# Supplementary material for: In(OTf)3-catalyzed intramolecular hydroarylation of α-phenylallyl β-ketosulfones – synthesis of sulfonyl 1-benzosuberones and 1-tetralones
Source: Royal Society of Chemistry journal article supplement (doi:10.1039/d0ra01962c), 2020-01-01
Supplement: d0ra01962c1.pdf [file d0ra01962c1.pdf]

## Supporting Information

# In(OTf)<sub>3</sub>-Catalyzed Intramolecular Hydroarylation of $\alpha$ -Phenylallyl $\beta$ -Ketosulfones. Synthesis of Sulfonyl 1-Benzosuberones and 1-Tetralones

Meng-Yang Chang,<sup>\*a,b</sup> Kai-Xiang Lai<sup>a</sup> and Yu-Lun Chang<sup>a</sup>

<sup>a</sup>Department of Medicinal and Applied Chemistry, Kaohsiung Medical University, Kaohsiung 807, Taiwan <sup>b</sup>Department of Medical Research, Kaohsiung Medical University Hospital, Kaohsiung 807, Taiwan

\*Corresponding authors: [mychang@kmu.edu.tw](mailto:mychang@kmu.edu.tw)

### Table of Contents

|                                                                                          |           |
|------------------------------------------------------------------------------------------|-----------|
| 1. <sup>1</sup> H NMR and <sup>13</sup> C NMR spectra copies of compounds <b>4a-4y</b>   | S2~S76    |
| 2. <sup>1</sup> H NMR and <sup>13</sup> C NMR spectra copies of compounds <b>5a-5l</b>   | S77~S114  |
| 3. <sup>1</sup> H NMR and <sup>13</sup> C NMR spectra copies of compounds <b>6a-6e</b>   | S115~S129 |
| 4. <sup>1</sup> H NMR and <sup>13</sup> C NMR spectra copies of compounds <b>7a-7d</b>   | S130~S145 |
| 5. <sup>1</sup> H NMR and <sup>13</sup> C NMR spectra copies of compounds <b>10a-10c</b> | S146~S155 |
| 6. X-ray crystal data of compounds <b>5a</b> , <b>5b</b> , <b>6a</b> and <b>10c</b>      | S156~S163 |

# Compound 4a (<sup>1</sup>H-NMR spectral data-1)

KSYE7C

Pulse Sequence: s2pu1

UNITYplus-400 "unity400"

Date: Aug 15 2018

Solvent: CDCl<sub>3</sub>

Ambient temperature

Total 32 repetitions

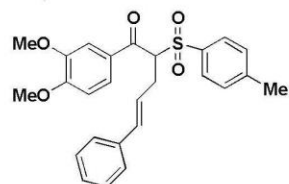

Compound 4a

<sup>1</sup>H NMR (400 MHz, CDCl<sub>3</sub>) spectra

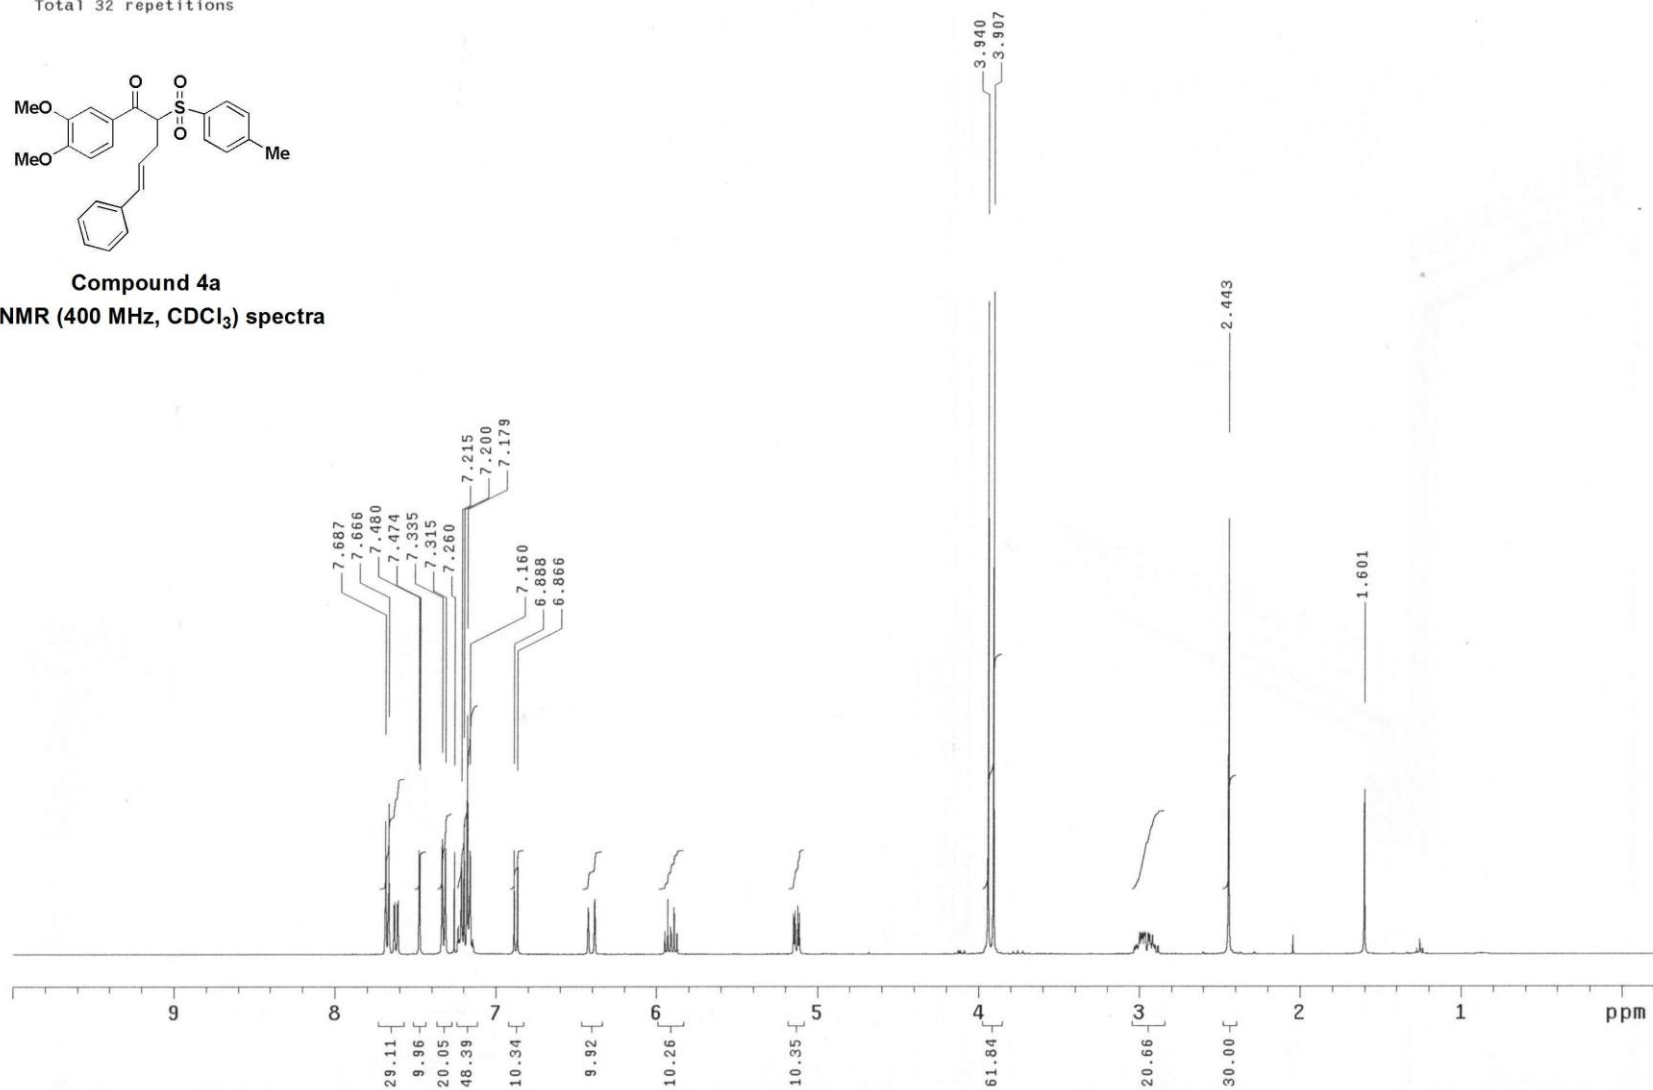

# Compound 4a (<sup>1</sup>H-NMR spectral data-2)

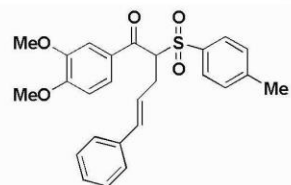

Compound 4a

<sup>1</sup>H NMR (400 MHz, CDCl<sub>3</sub>) spectra

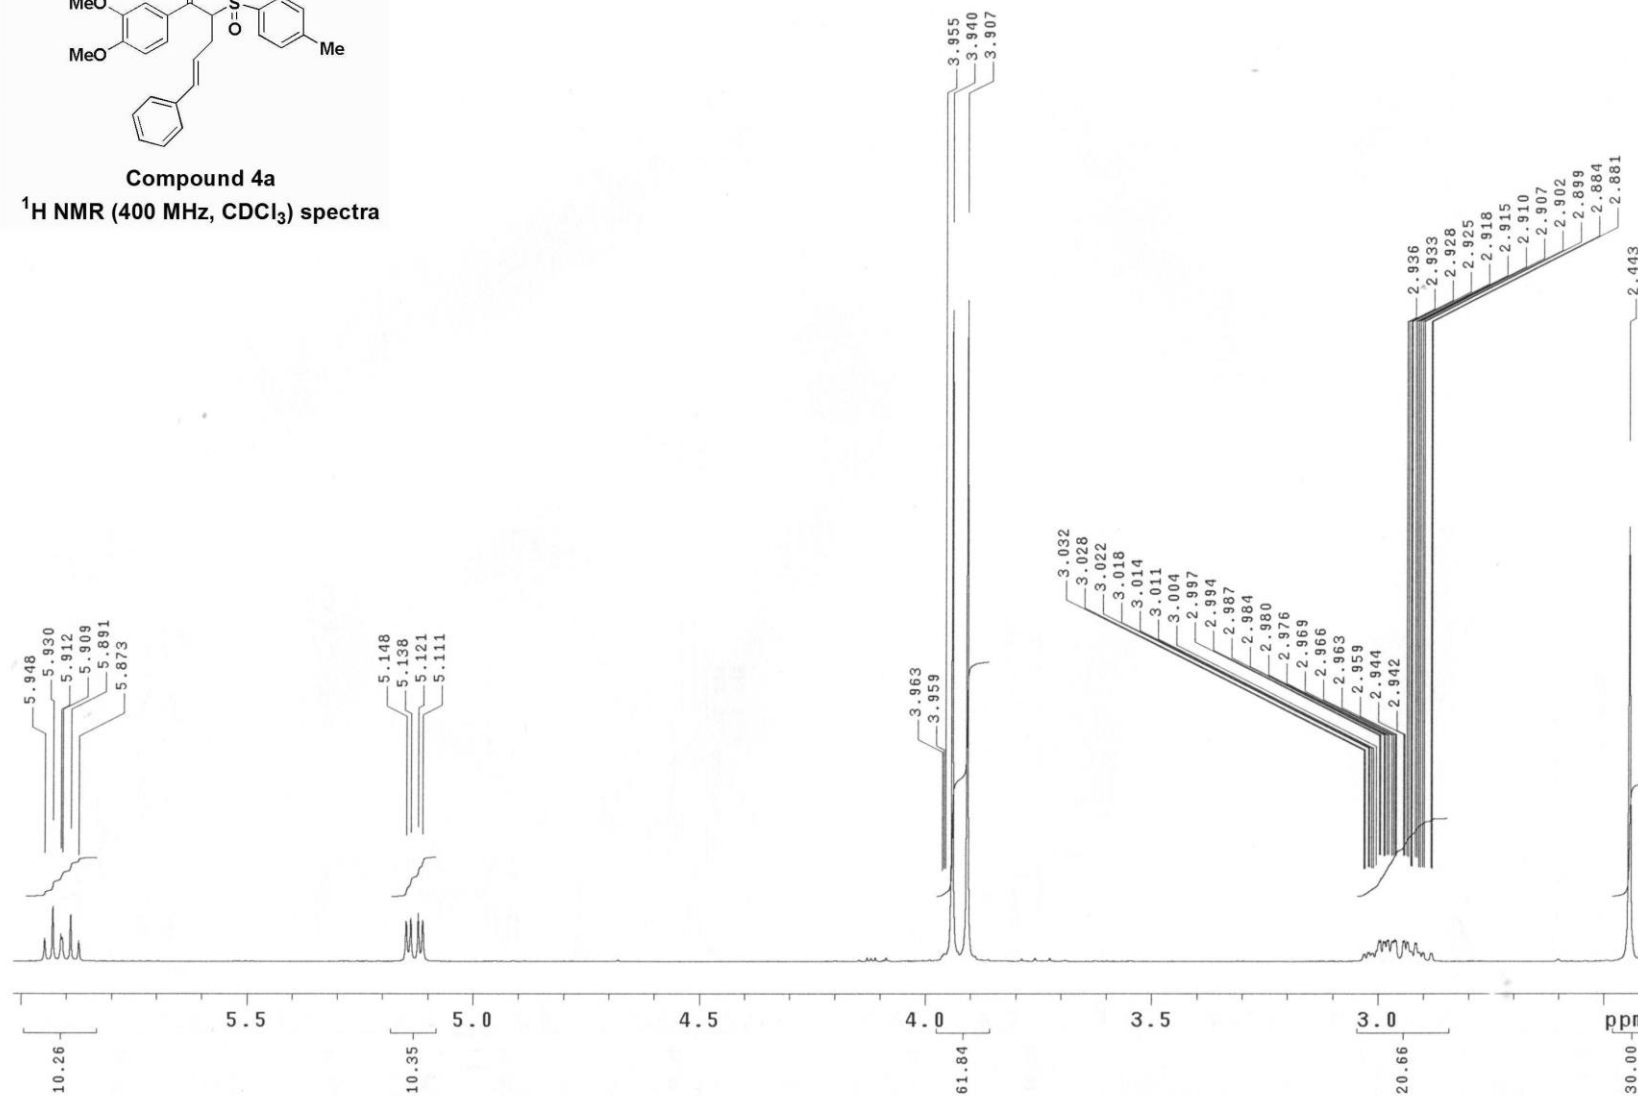

# Compound 4a ( $^{13}\text{C}$ -NMR spectral data)

KSYE7C

Pulse Sequence: s2pu1

UNITYplus-400 "unity400"

Date: Aug 15 2018

Solvent:  $\text{CDCl}_3$

Ambient temperature

Total 720 repetitions

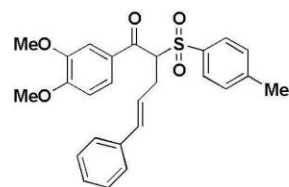

Compound 4a

$^{13}\text{C}$  NMR (100 MHz,  $\text{CDCl}_3$ ) spectra

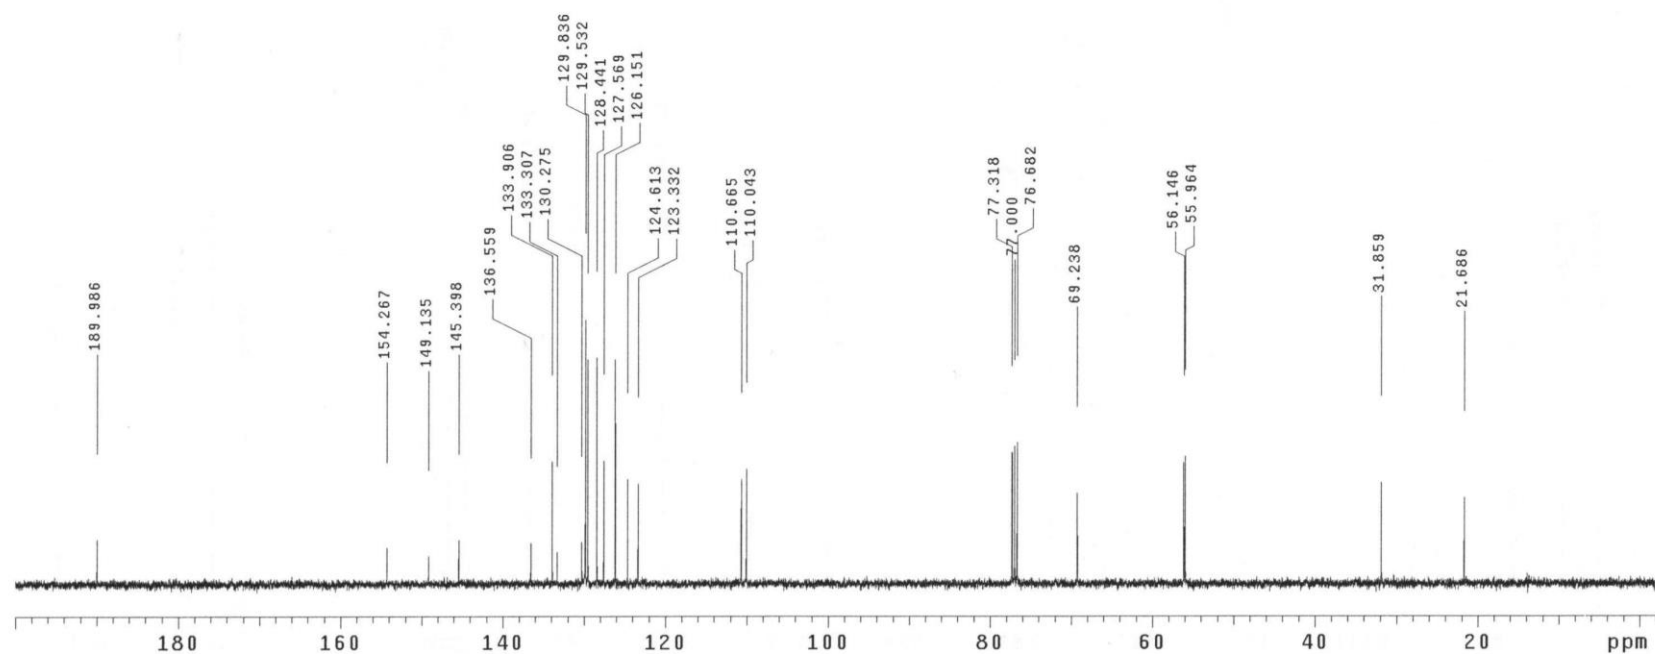

# Compound 4b (<sup>1</sup>H-NMR spectral data-1)

KSE8C

Pulse Sequence: s2pu1

UNITYplus-400 "unity400"

Date: Sep 11 2018

Solvent: CDCl<sub>3</sub>

Ambient temperature

Total 32 repetitions

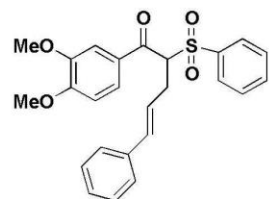

Compound 4b

<sup>1</sup>H NMR (400 MHz, CDCl<sub>3</sub>) spectra

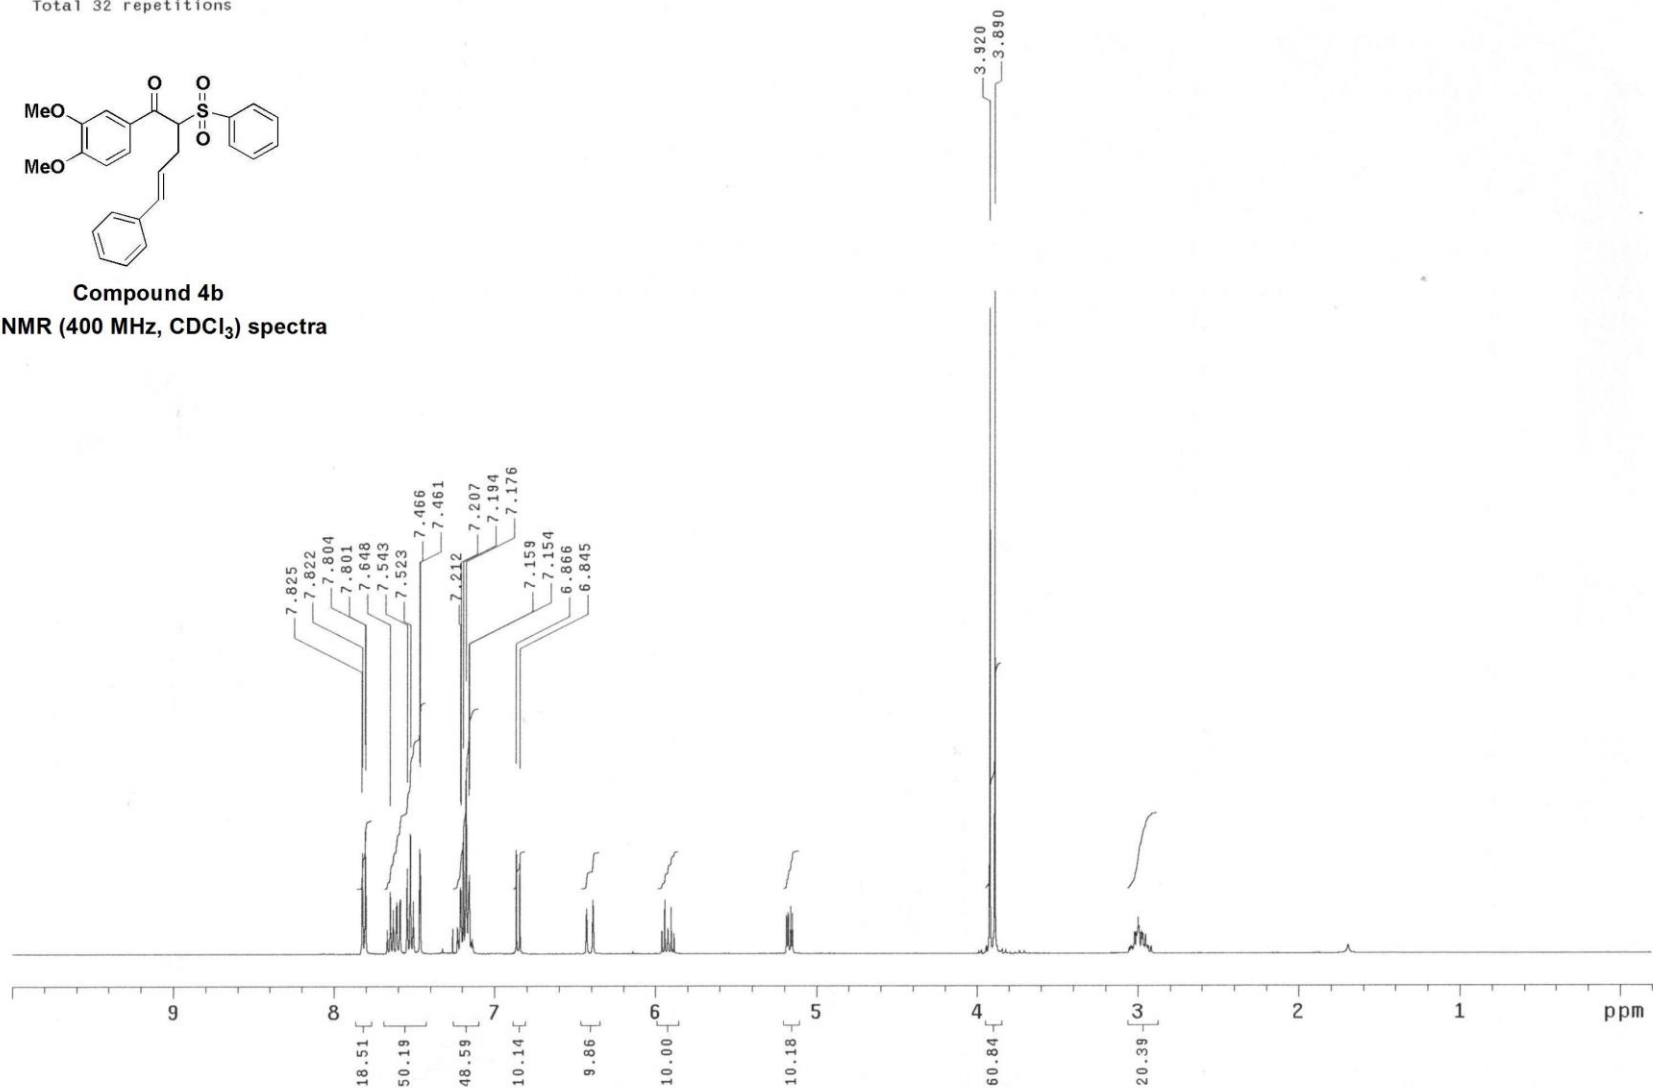

# Compound 4b (<sup>1</sup>H-NMR spectral data-2)

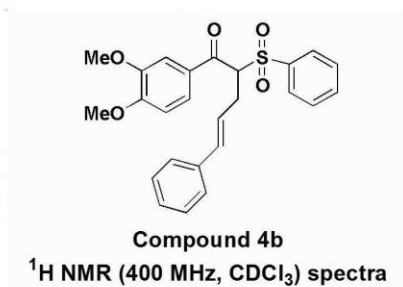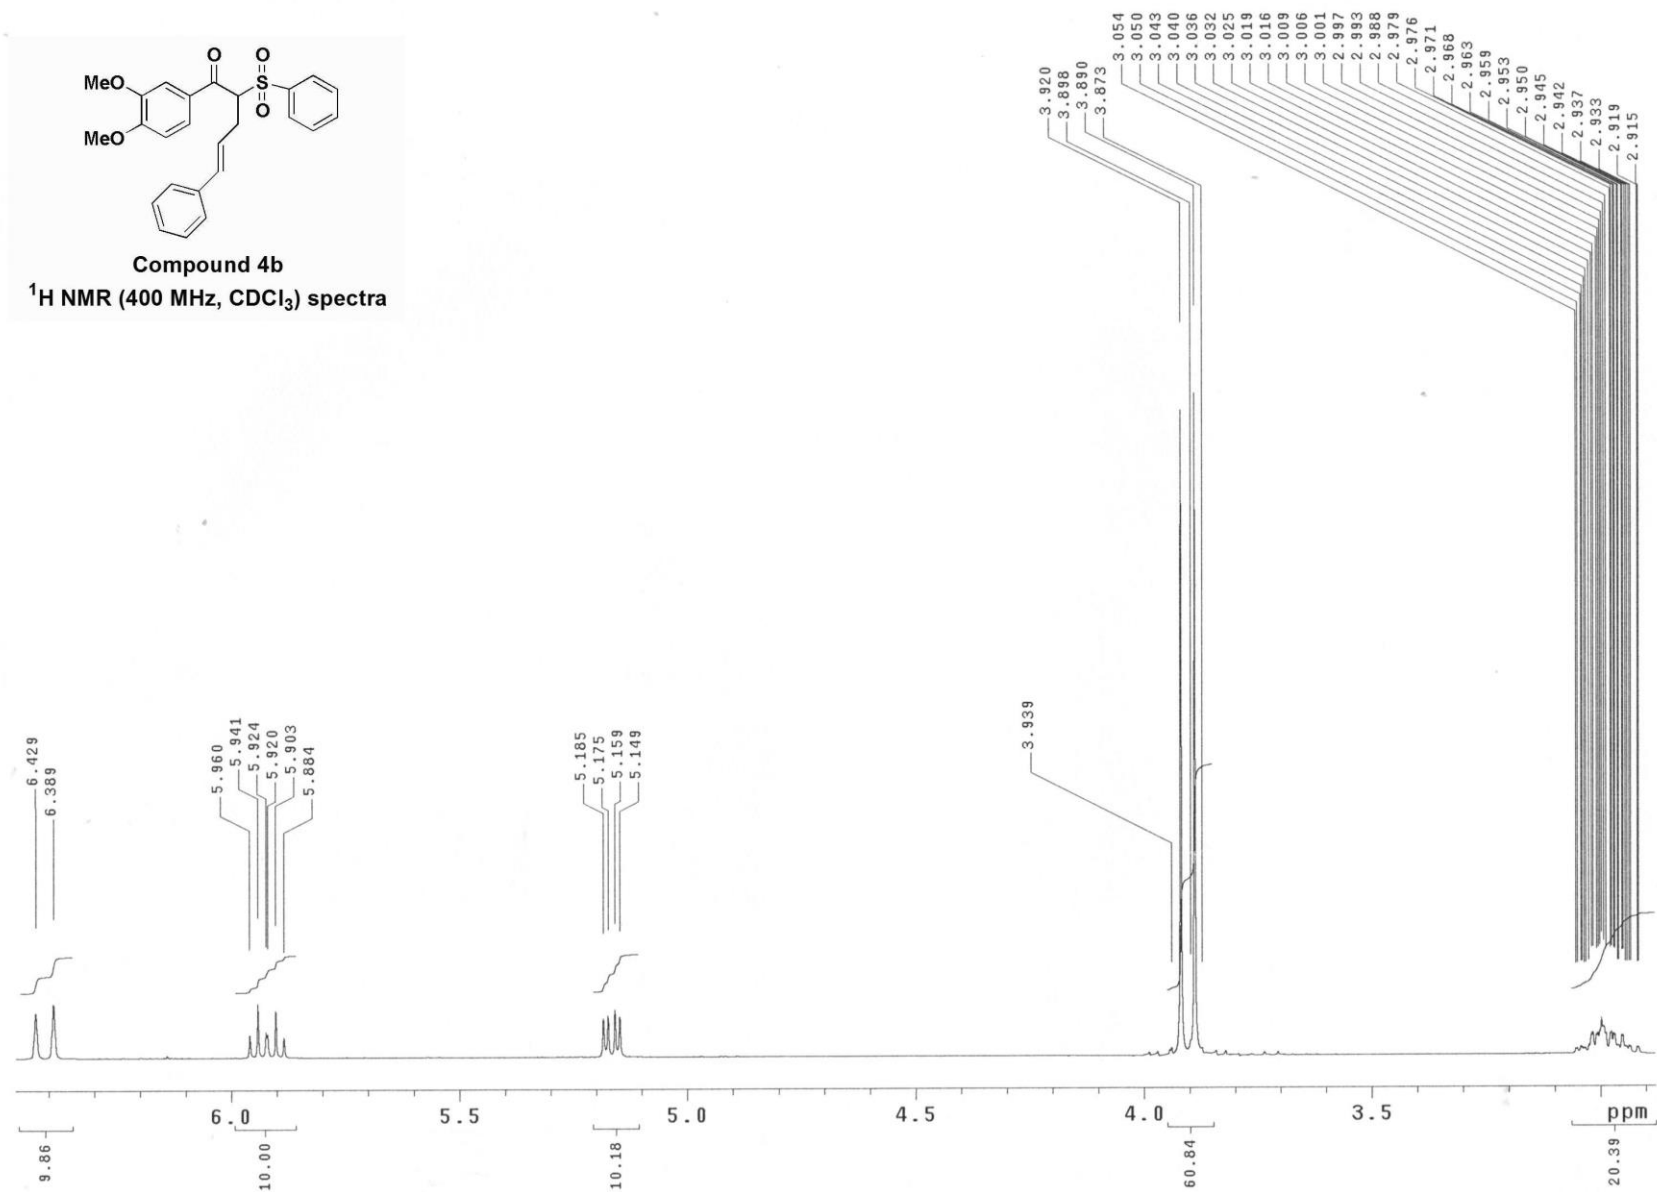

# Compound 4b (<sup>13</sup>C-NMR spectral data)

KSE8C

Pulse Sequence: s2pu1  
 UNITYplus-400 "unity400"  
 Date: Sep 11 2018  
 Solvent: CDCl<sub>3</sub>  
 Ambient temperature  
 Total 432 repetitions

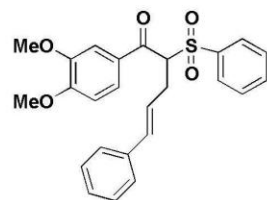

Compound 4b

<sup>13</sup>C NMR (100 MHz, CDCl<sub>3</sub>) spectra

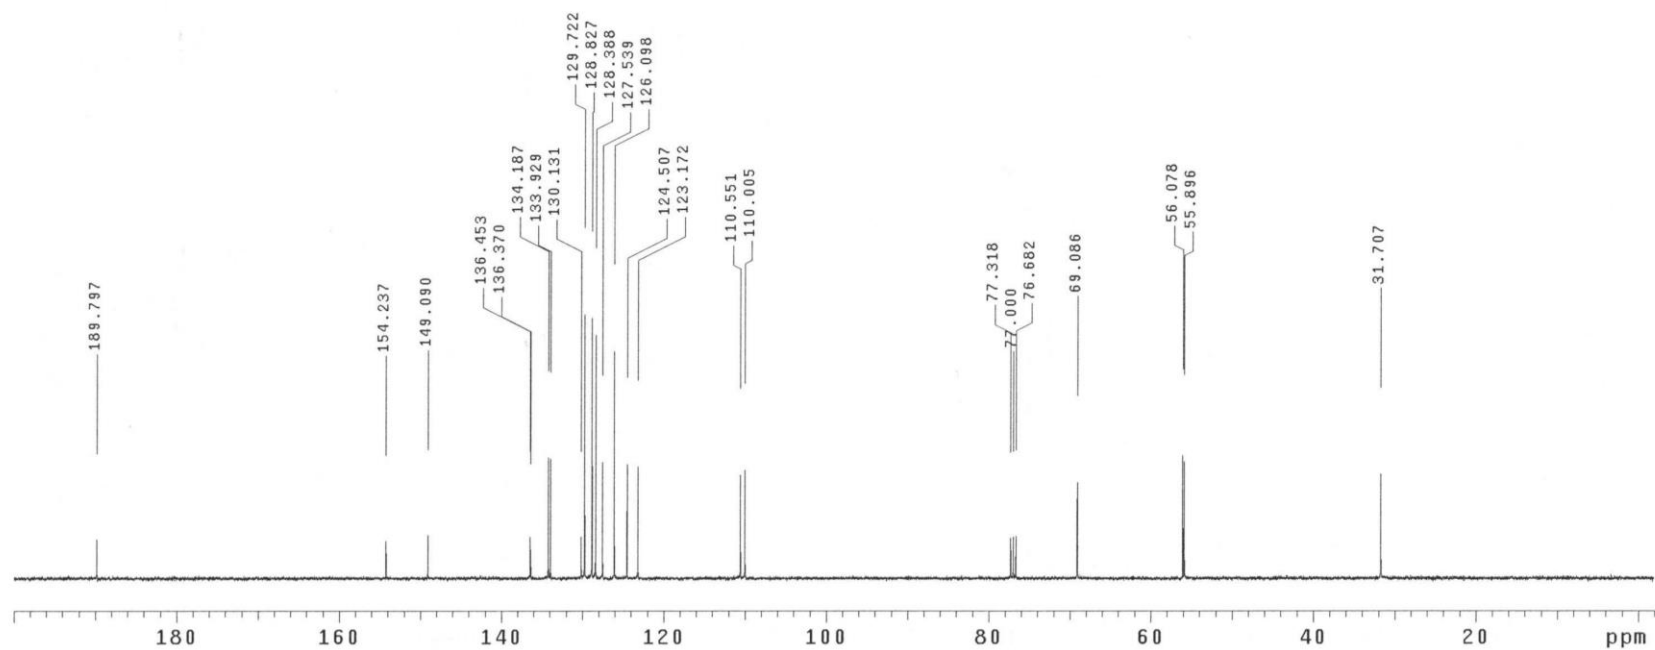

# Compound 4c (<sup>1</sup>H-NMR spectral data-1)

KSE11C

Pulse Sequence: s2pu1

UNITYplus-400 "unity400"

Date: Nov 6 2018

Solvent: CDCl<sub>3</sub>

Ambient temperature

Total 32 repetitions

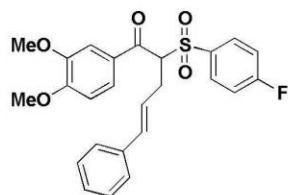

Compound 4c

<sup>1</sup>H NMR (400 MHz, CDCl<sub>3</sub>) spectra

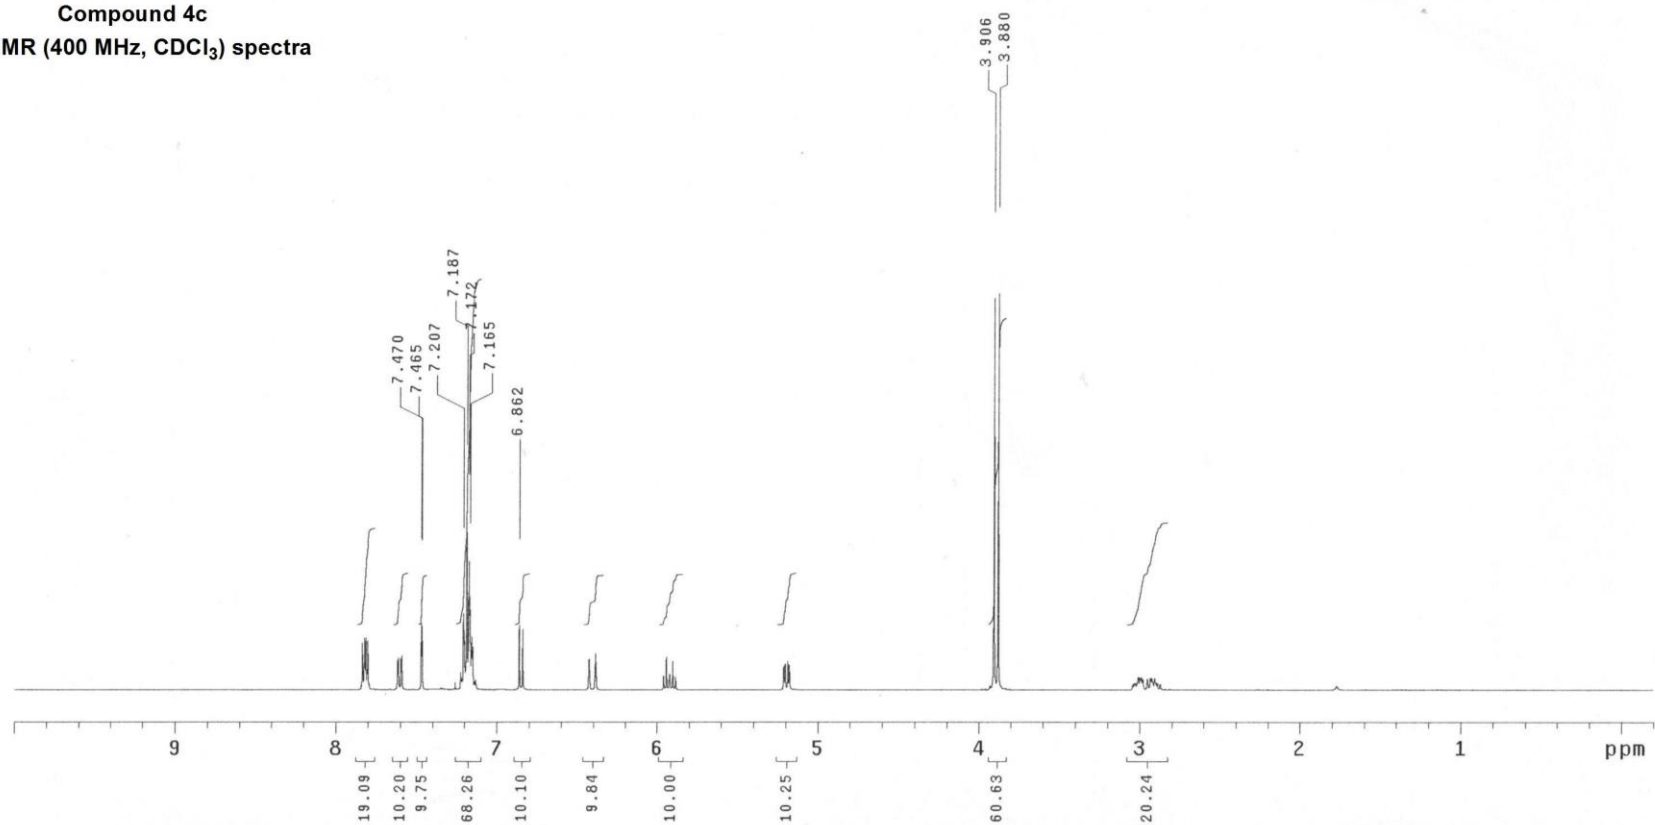

# Compound 4c (<sup>1</sup>H-NMR spectral data-2)

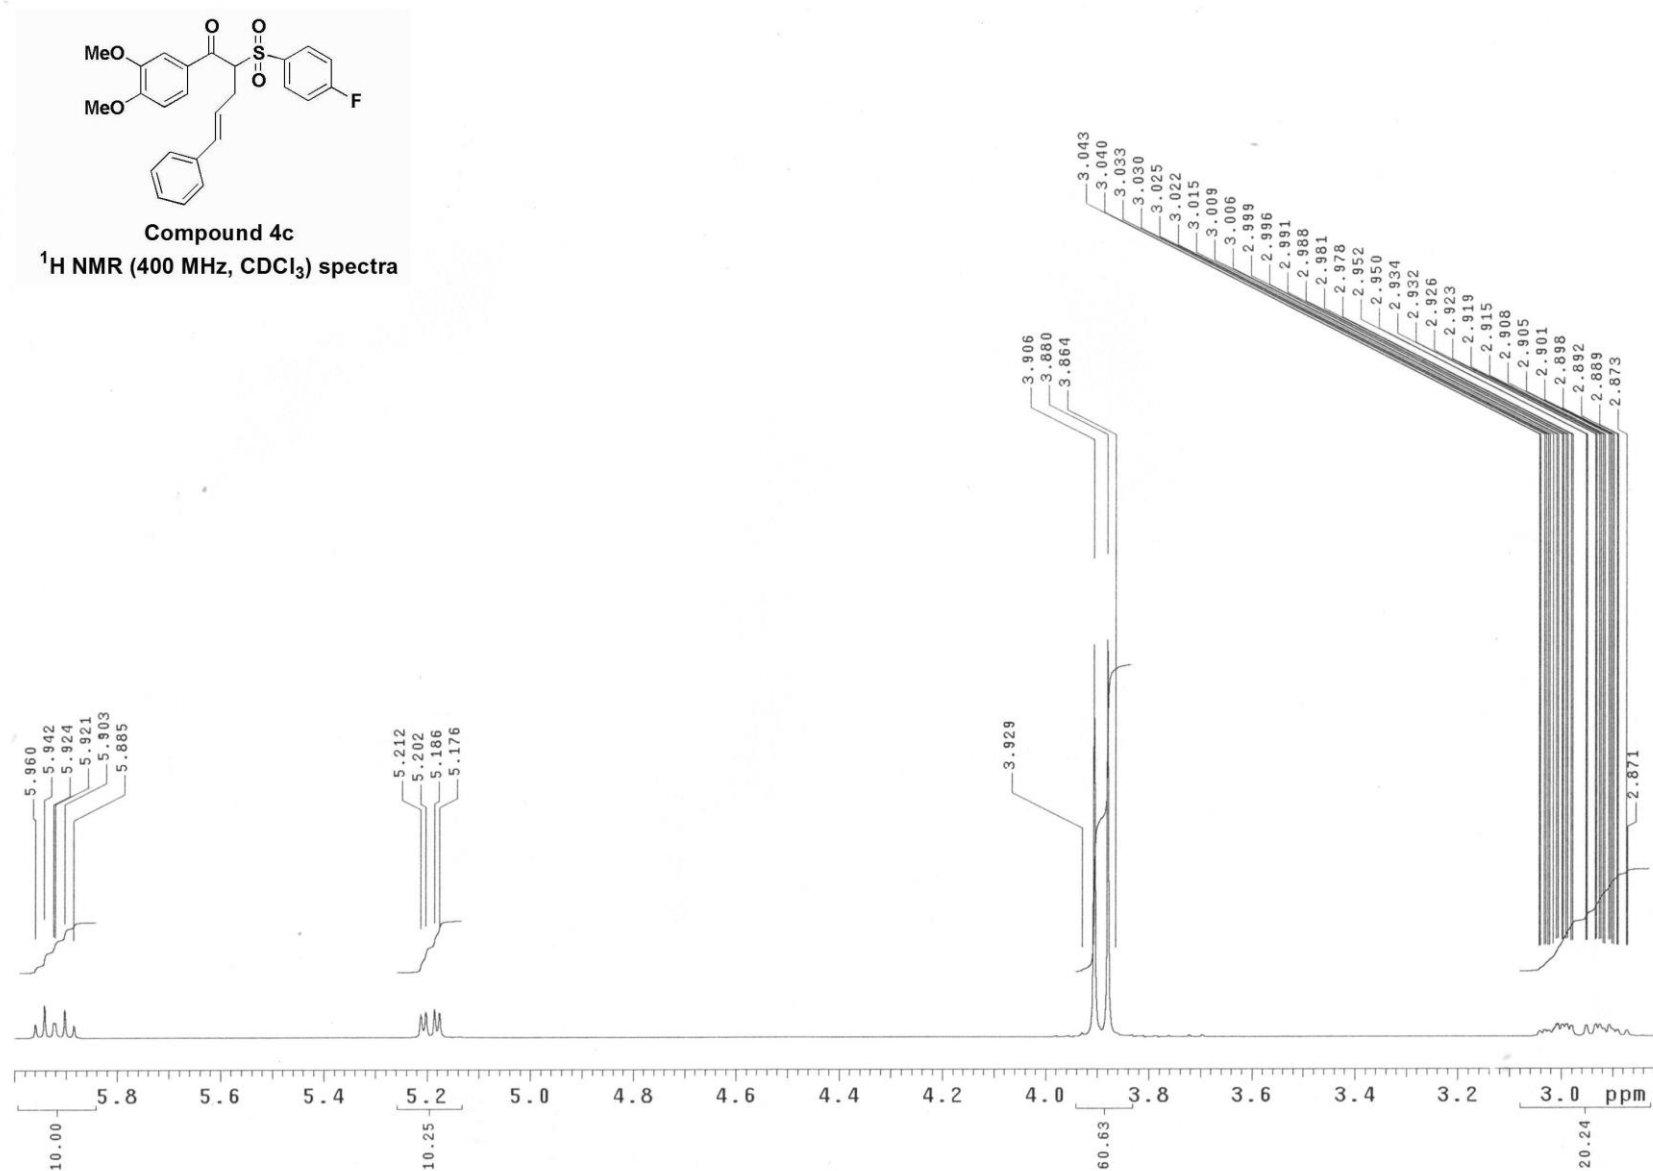

# Compound 4c (<sup>13</sup>C-NMR spectral data)

KSE11C

Pulse Sequence: s2pu1  
 UNITYplus-400 "unity400"  
 Date: Nov 6 2018  
 Solvent: CDCl<sub>3</sub>  
 Ambient temperature  
 Total 288 repetitions

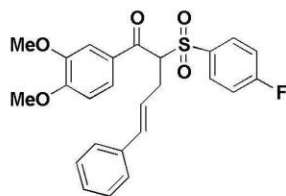

Compound 4c

<sup>13</sup>C NMR (100 MHz, CDCl<sub>3</sub>) spectra

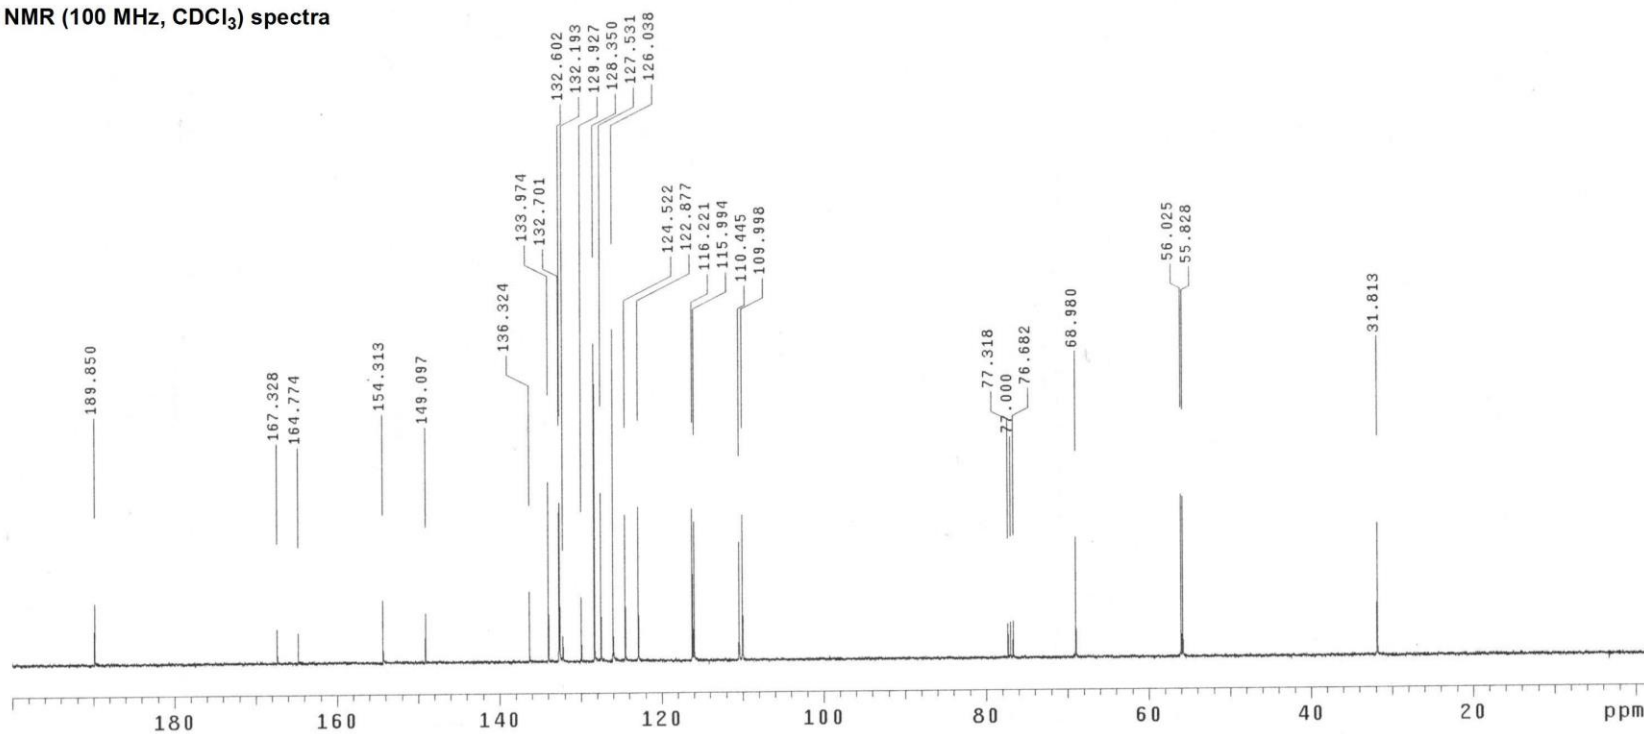

# Compound 4d (<sup>1</sup>H-NMR spectral data-1)

KSOMeC

Pulse Sequence: s2pu1  
UNITYplus-400 "unity400"  
Date: Nov 29 2018  
Solvent: CDCl<sub>3</sub>  
Ambient temperature  
Total 32 repetitions

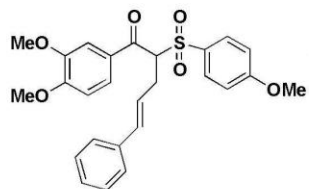

Compound 4d

<sup>1</sup>H NMR (400 MHz, CDCl<sub>3</sub>) spectra

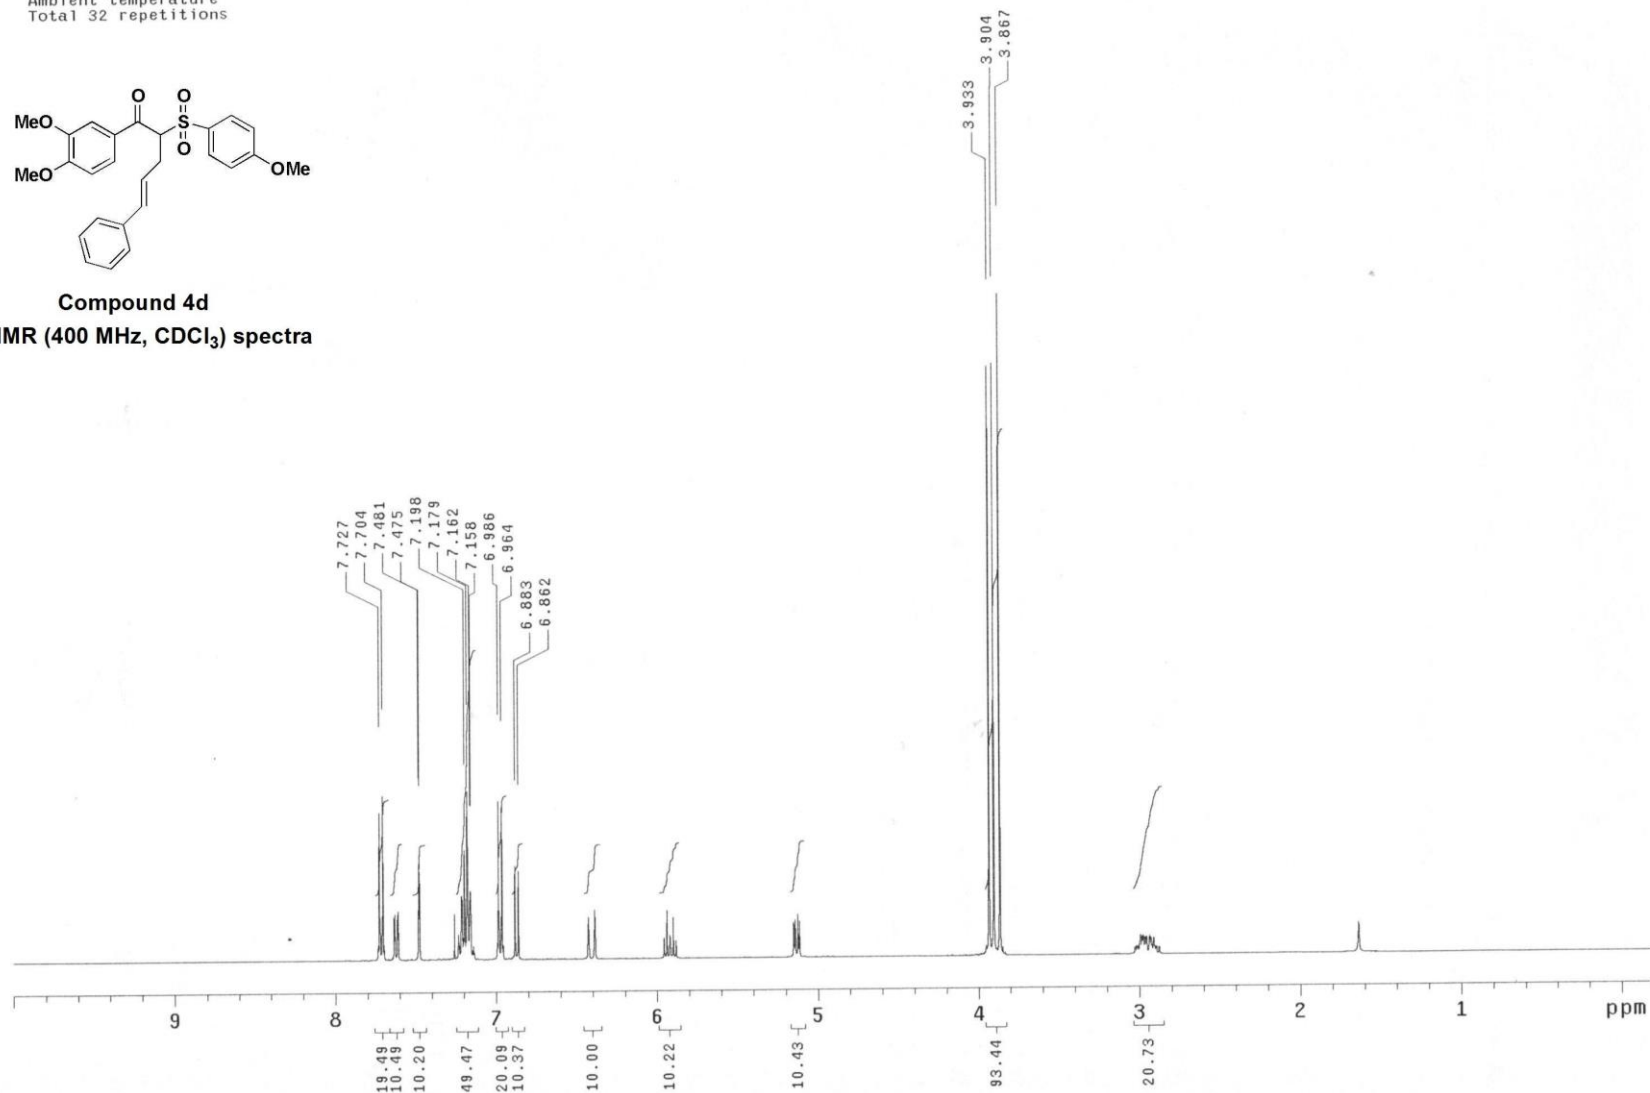

# Compound 4d (<sup>1</sup>H-NMR spectral data-2)

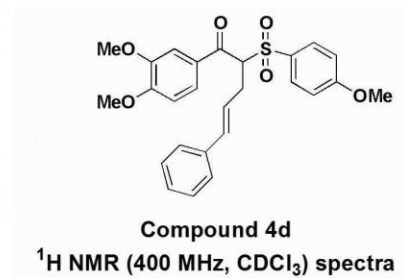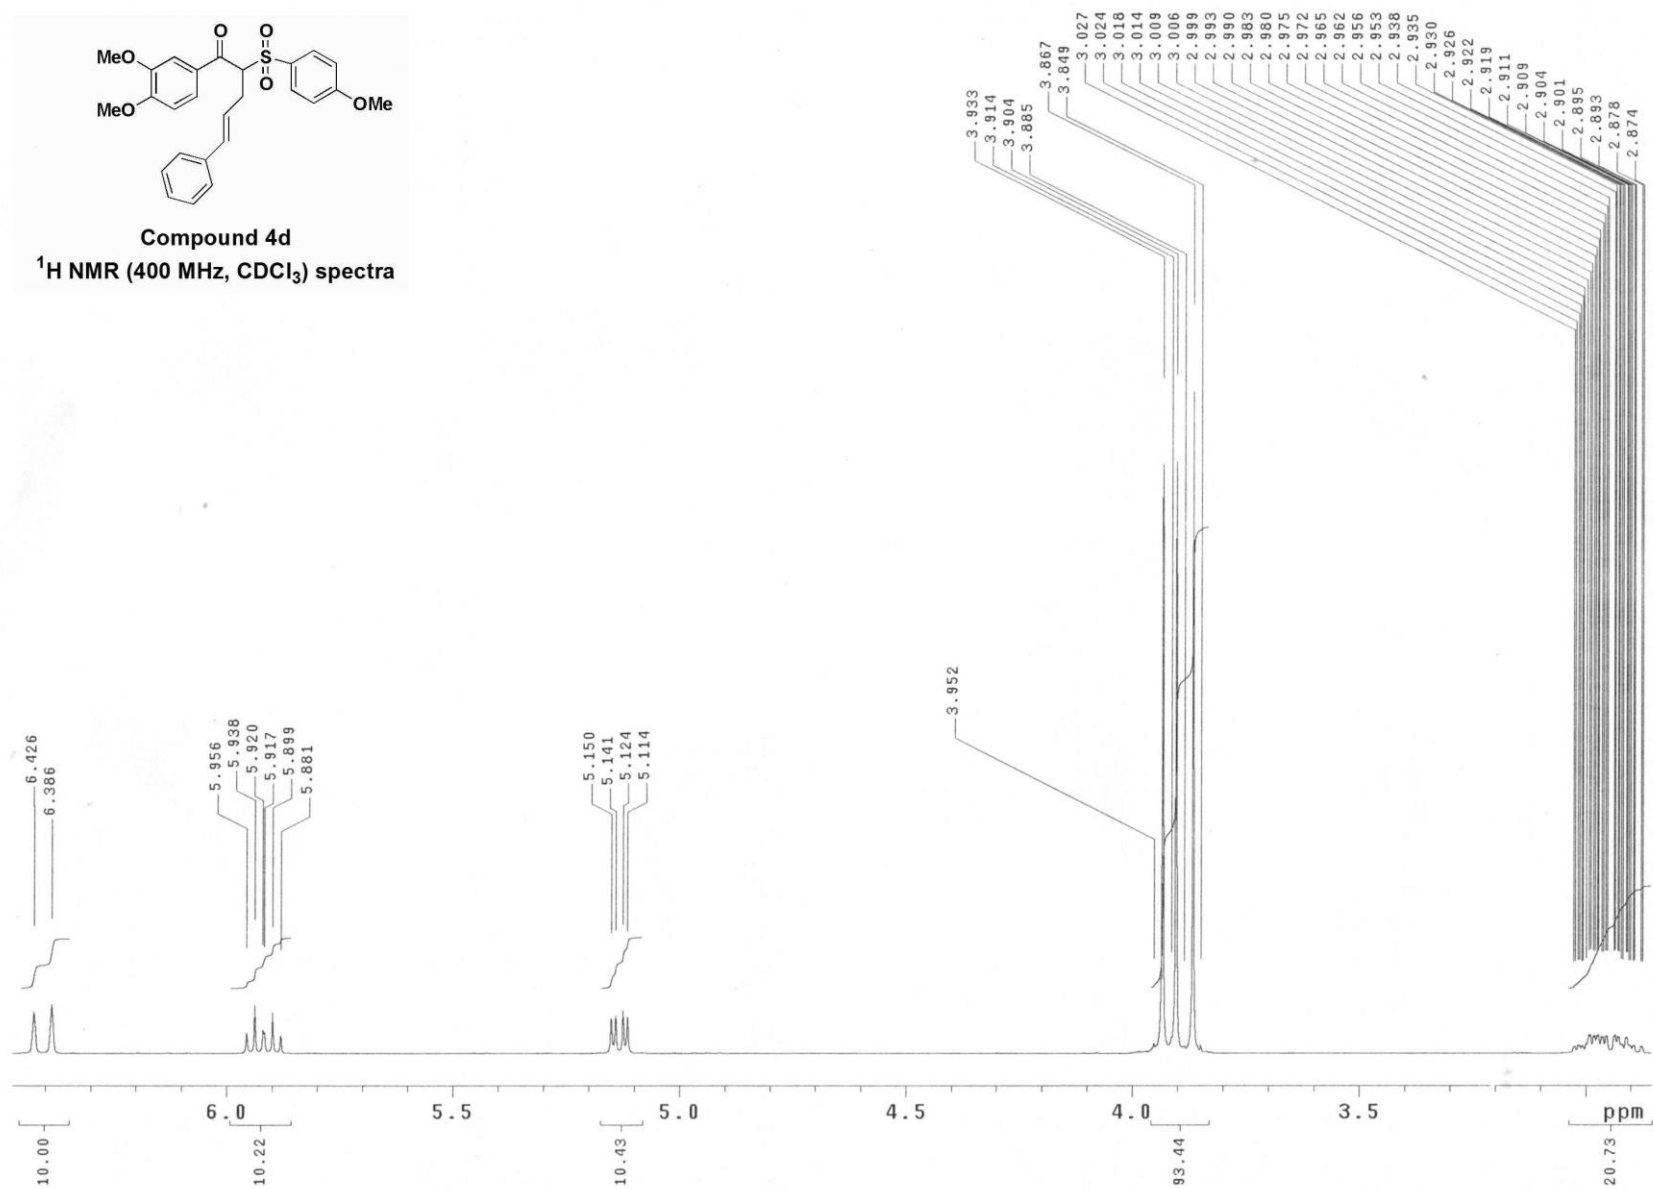

# Compound 4d (<sup>13</sup>C-NMR spectral data)

KSOMeC

Pulse Sequence: s2pul  
 UNITYplus-400 "unity400"  
 Date: Nov 29 2018  
 Solvent: CDCl<sub>3</sub>  
 Ambient temperature  
 Total 720 repetitions

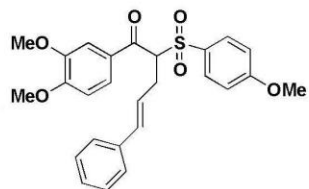

Compound 4d

<sup>13</sup>C NMR (100 MHz, CDCl<sub>3</sub>) spectra

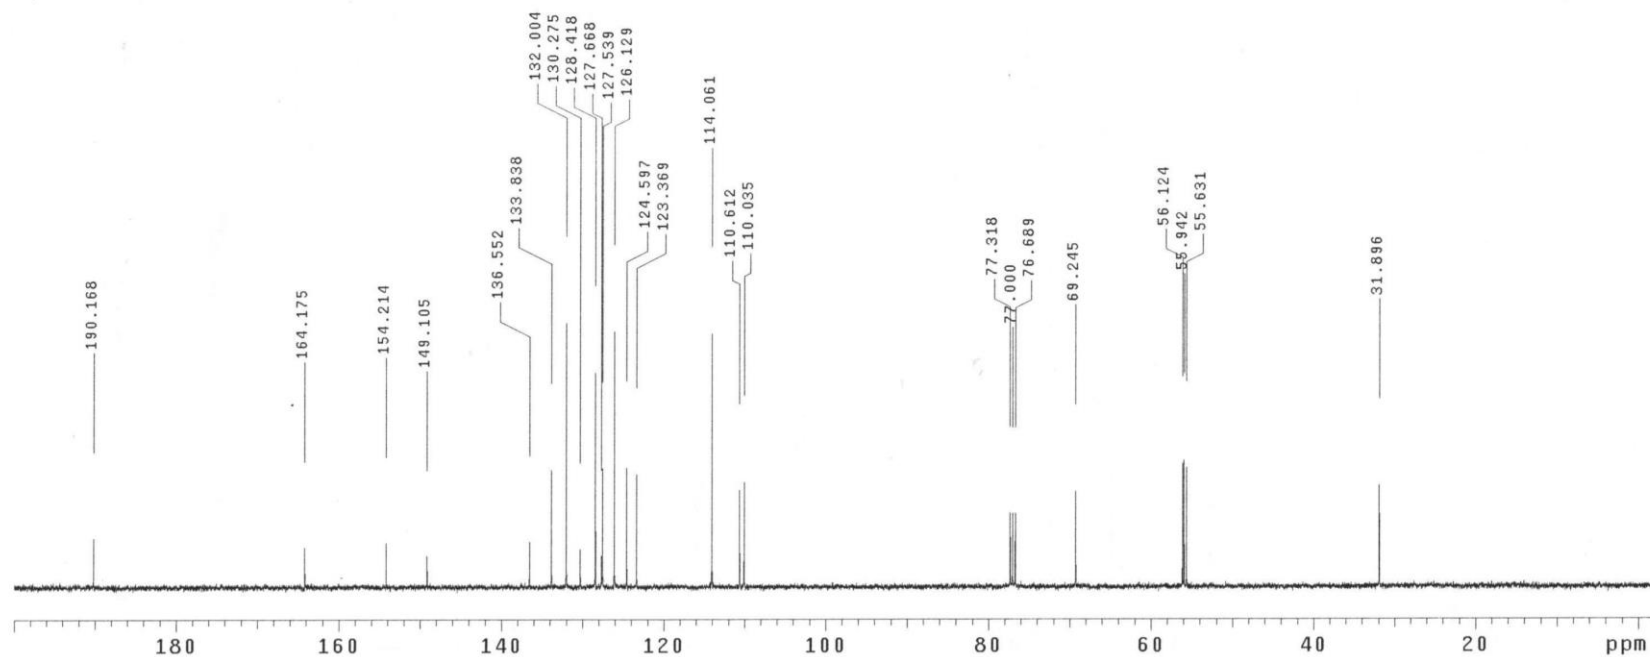

# Compound 4e (<sup>1</sup>H-NMR spectral data-1)

KSPHbUC

Pulse Sequence: s2pu1  
 UNITYplus-400 "unity400"  
 Date: Jan 8 2019  
 Solvent: CDCl<sub>3</sub>  
 Ambient temperature  
 Total 32 repetitions

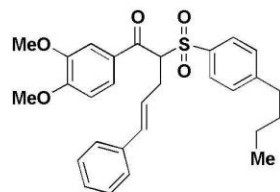

Compound 4e

<sup>1</sup>H NMR (400 MHz, CDCl<sub>3</sub>) spectra

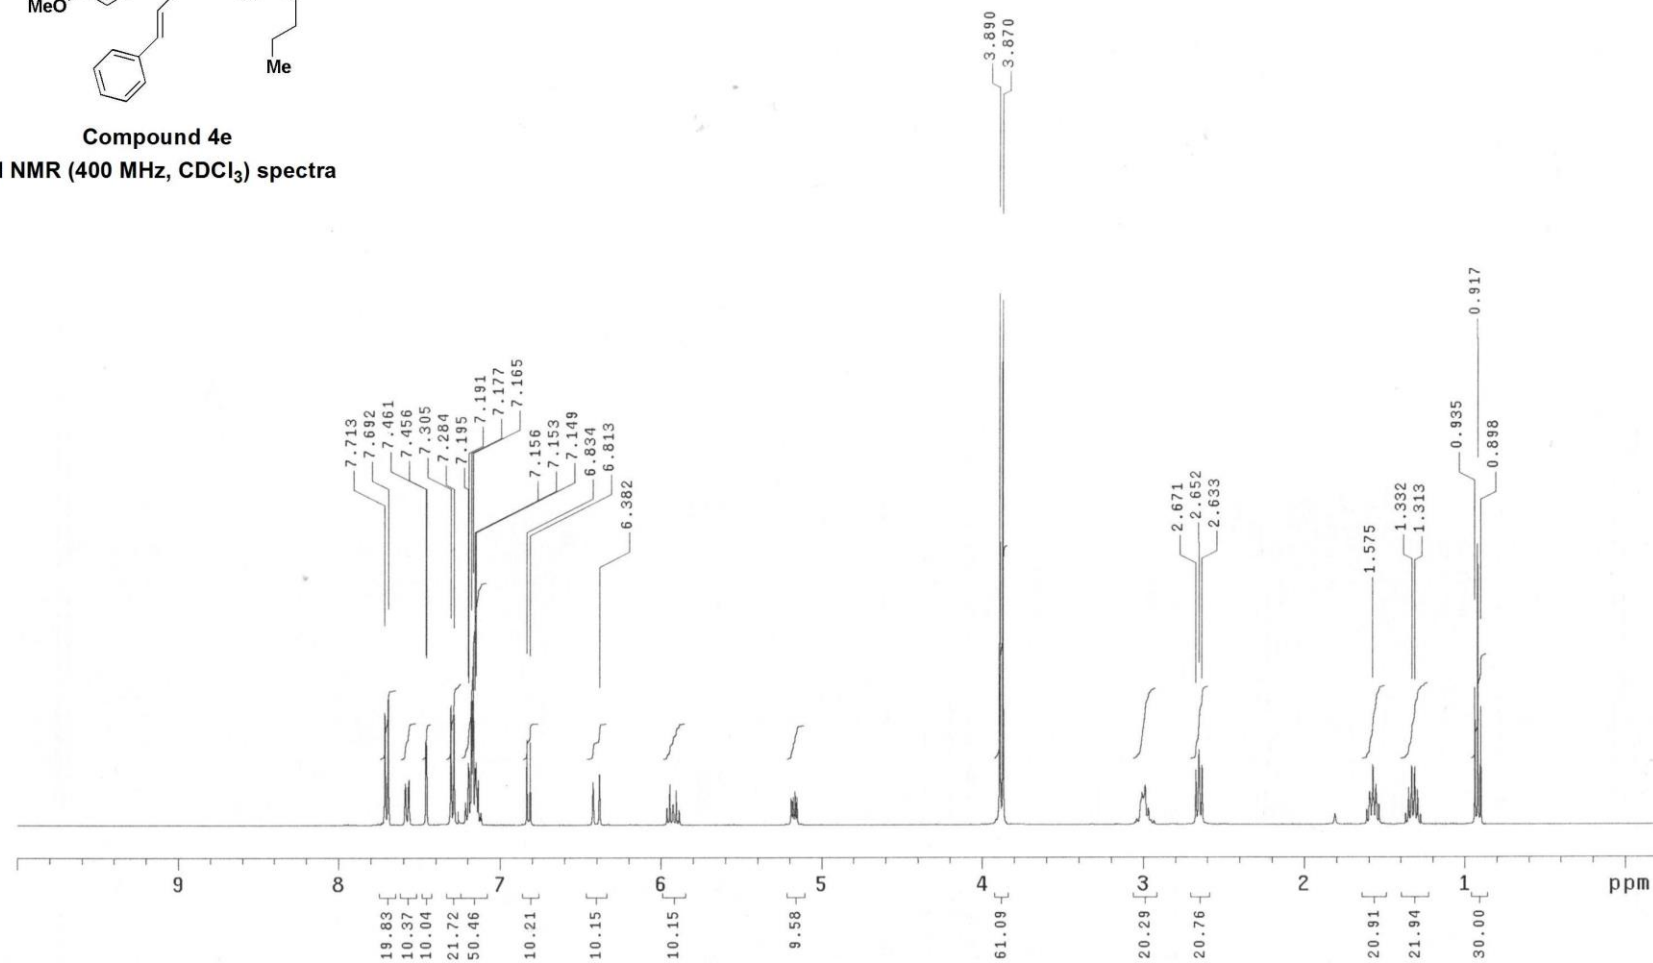

# Compound 4e (<sup>1</sup>H-NMR spectral data-2)

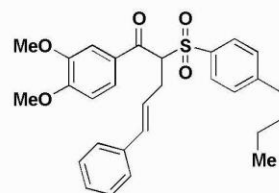

Compound 4e

<sup>1</sup>H NMR (400 MHz, CDCl<sub>3</sub>) spectra

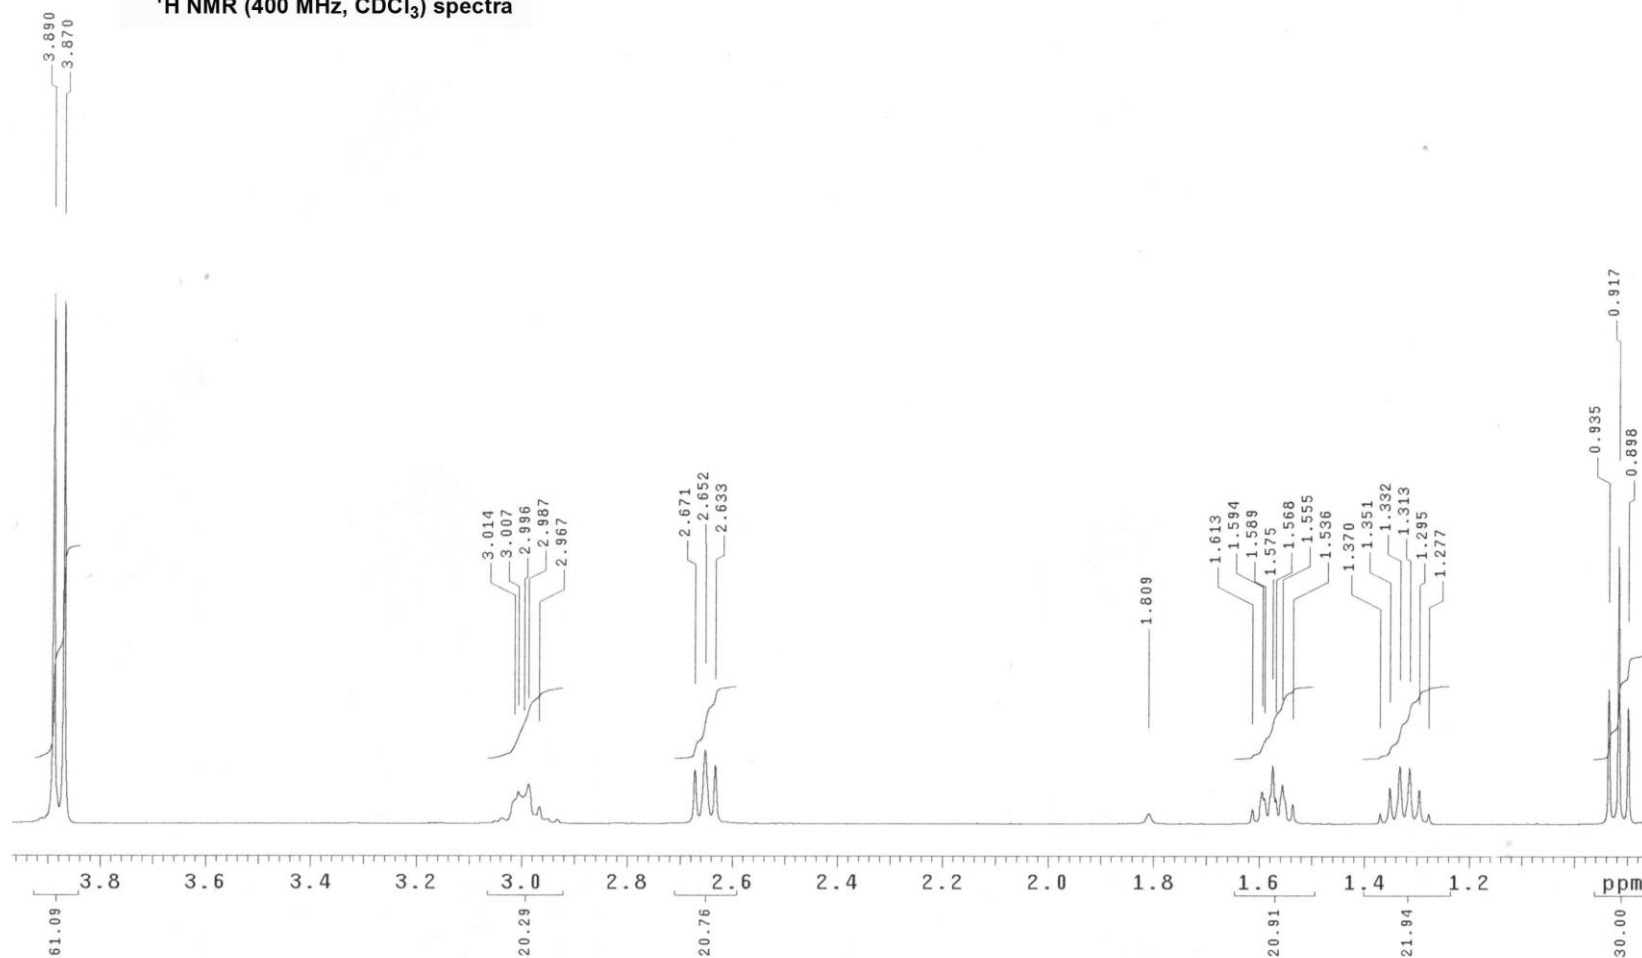

# Compound 4e (<sup>13</sup>C-NMR spectral data)

KSPHbUC

Pulse Sequence: s2pu1

UNITYplus-400 "unity400"

Date: Jan 8 2019

Solvent: CDCl<sub>3</sub>

Ambient temperature

Total 1536 repetitions

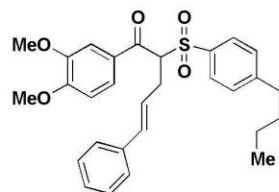

Compound 4e

<sup>13</sup>C NMR (100 MHz, CDCl<sub>3</sub>) spectra

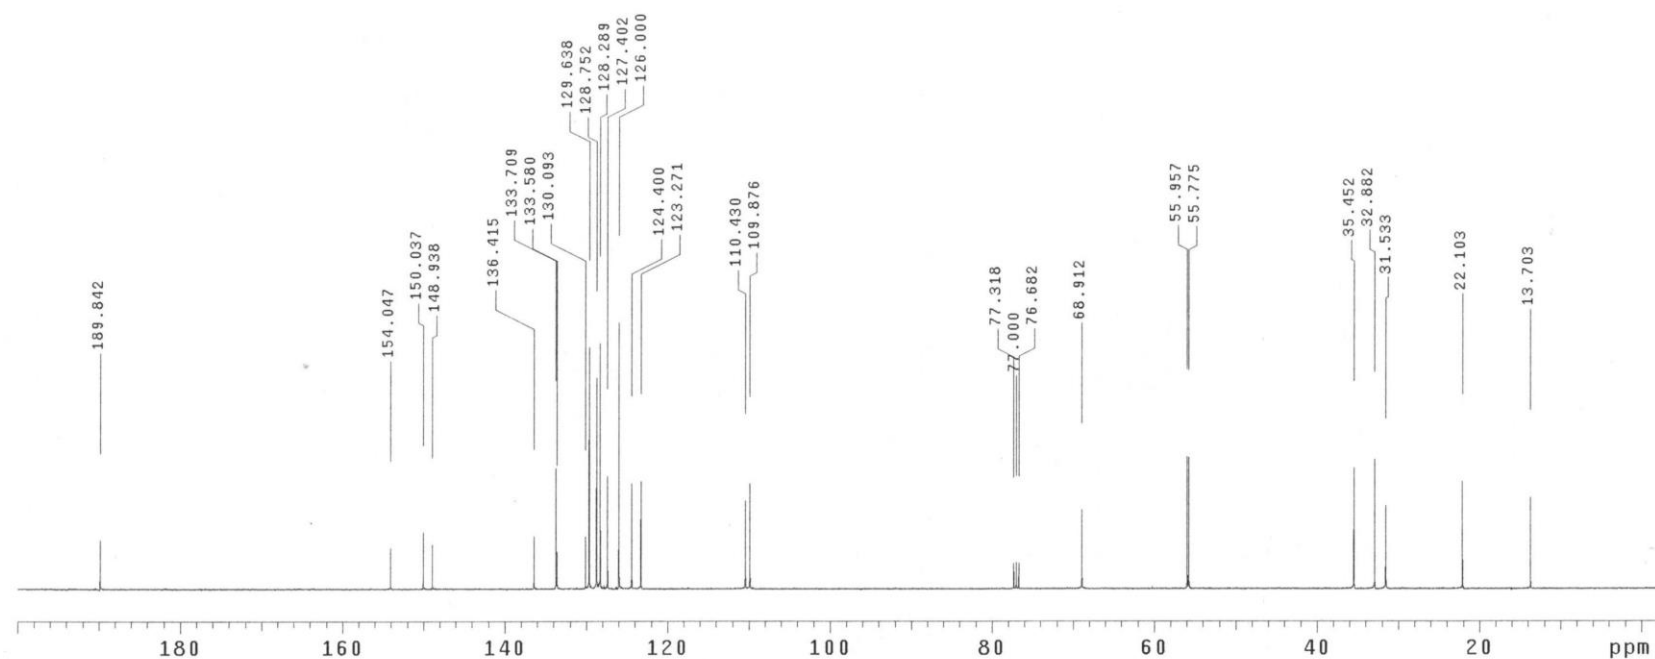

# Compound 4f (<sup>1</sup>H-NMR spectral data-1)

KSMsC

Pulse Sequence: s2pu1  
 UNITYplus-400 "unity400"  
 Date: Dec 4 2018  
 Solvent: CDCl<sub>3</sub>  
 Ambient temperature  
 Total 32 repetitions

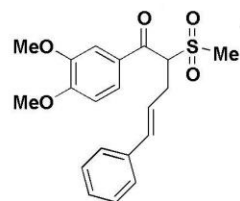

Compound 4f

<sup>1</sup>H NMR (400 MHz, CDCl<sub>3</sub>) spectra

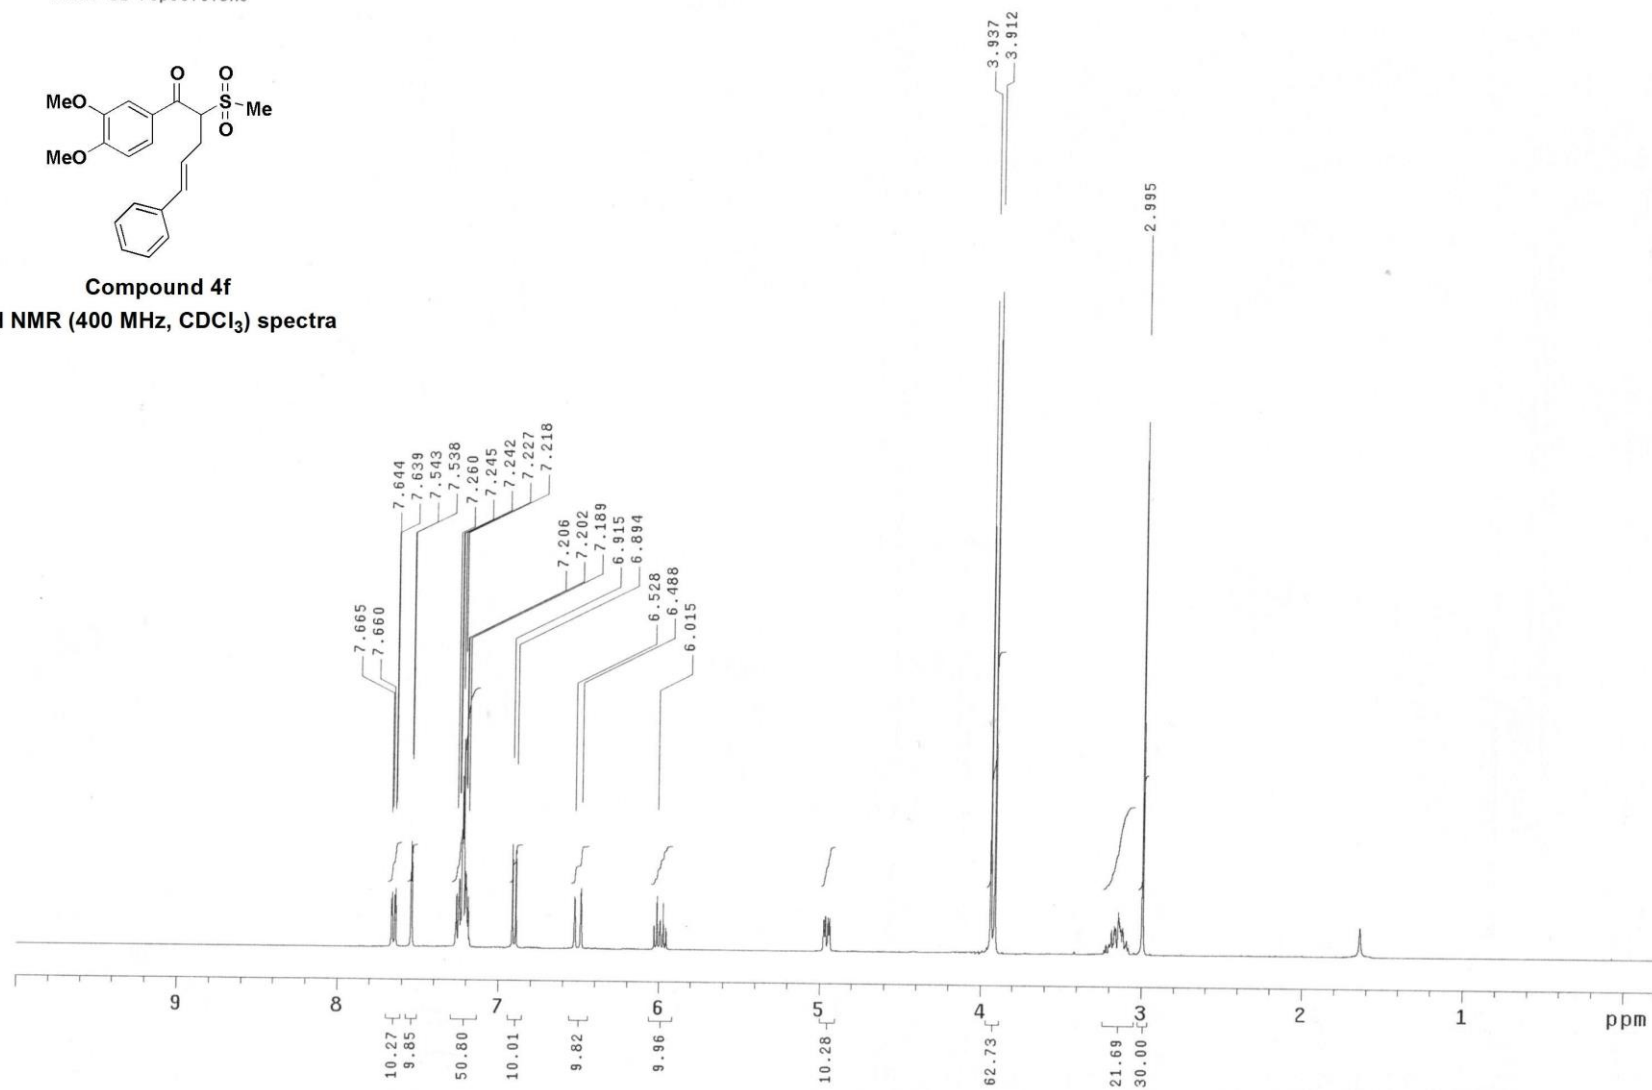

# Compound 4f (<sup>1</sup>H-NMR spectral data-2)

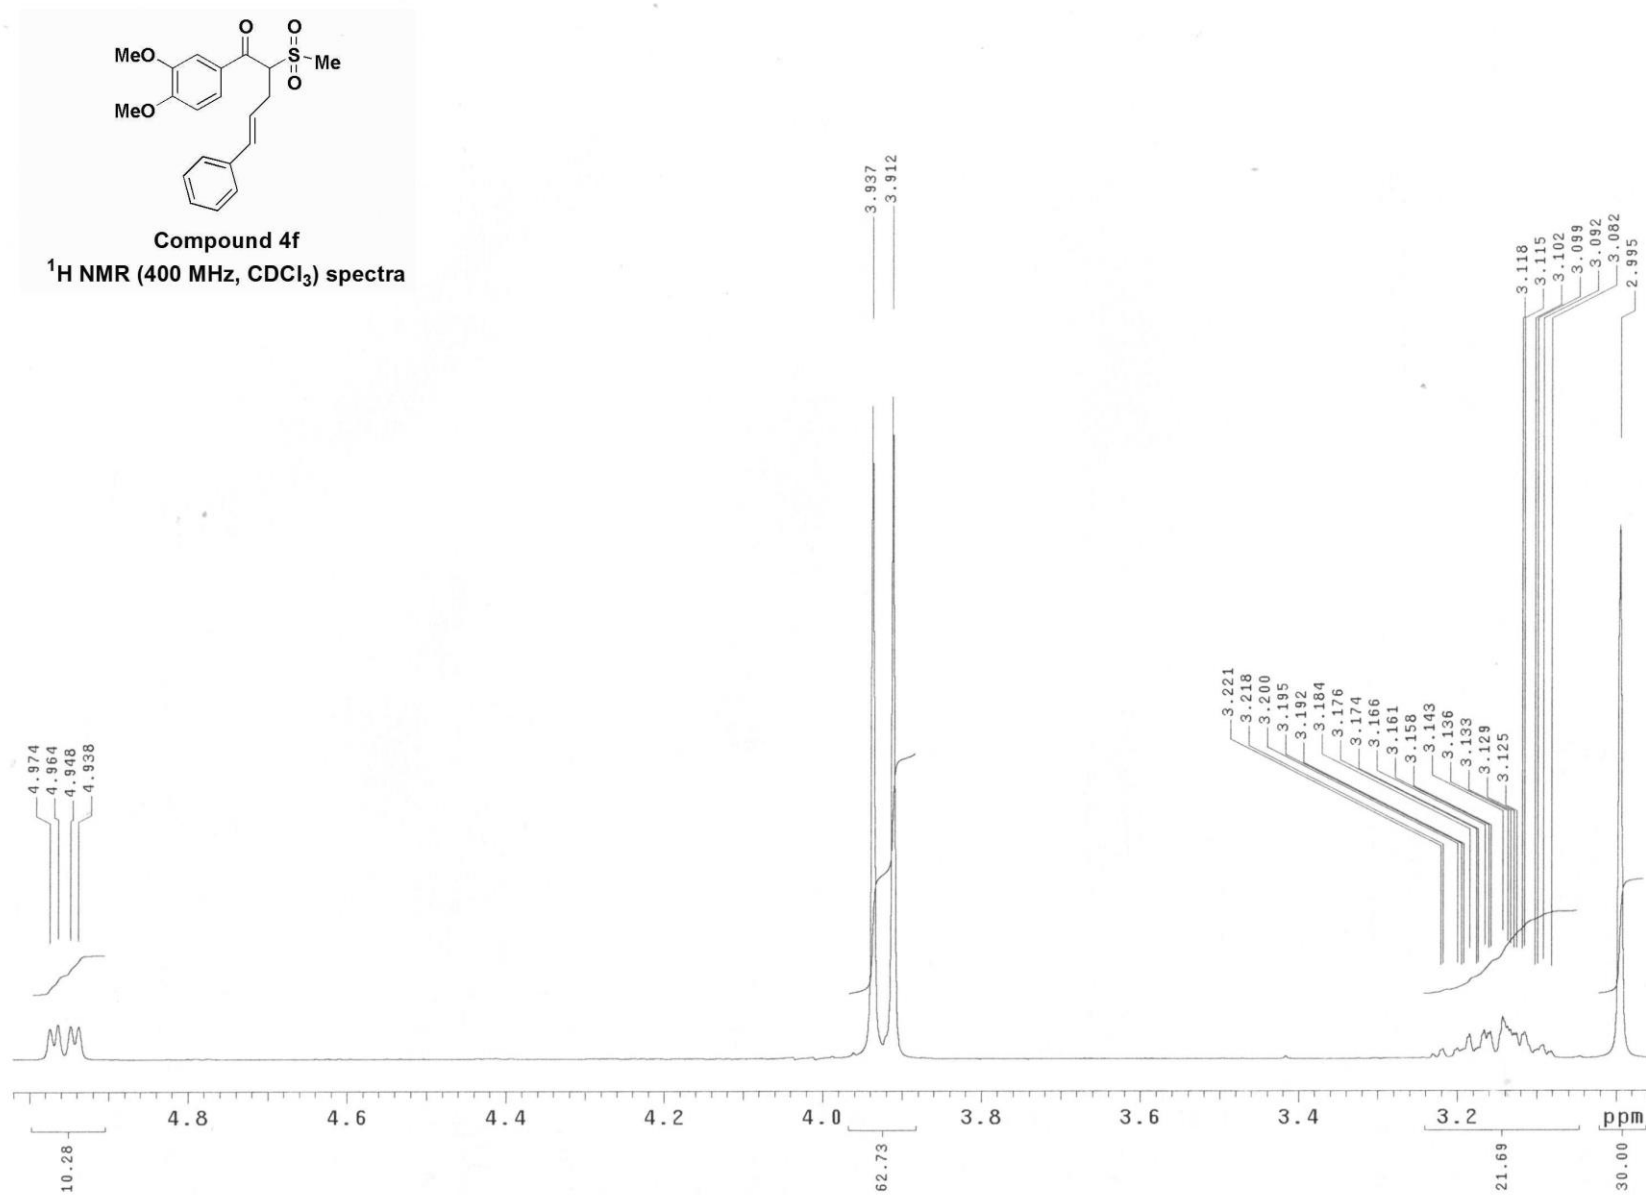

# Compound 4f (<sup>13</sup>C-NMR spectral data)

KSMsC

Pulse Sequence: s2pu1  
UNITYplus-400 "unity400"  
Date: Dec 4 2018  
Solvent: CDCl<sub>3</sub>  
Ambient temperature  
Total 2592 repetitions

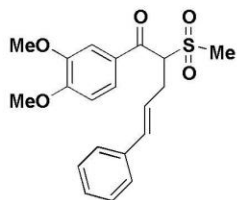

Compound 4f

<sup>13</sup>C NMR (100 MHz, CDCl<sub>3</sub>) spectra

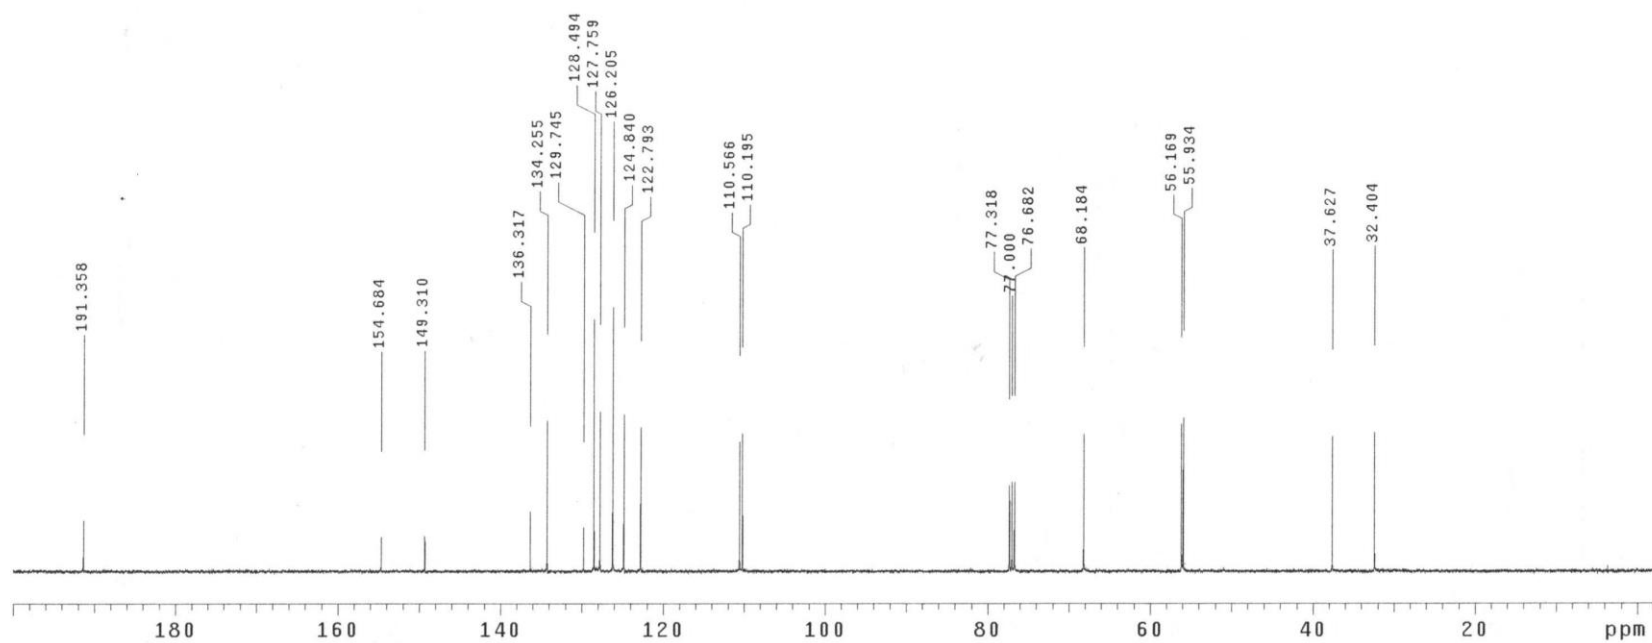

# Compound 4g (<sup>1</sup>H-NMR spectral data-1)

KSBUc

Pulse Sequence: s2pu1

UNITYplus-400 "unity400"

Date: Nov 30 2018

Solvent: CDCl<sub>3</sub>

Ambient temperature

Total 32 repetitions

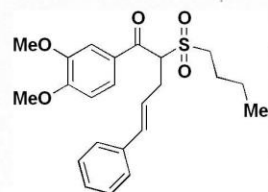

Compound 4g

<sup>1</sup>H NMR (400 MHz, CDCl<sub>3</sub>) spectra

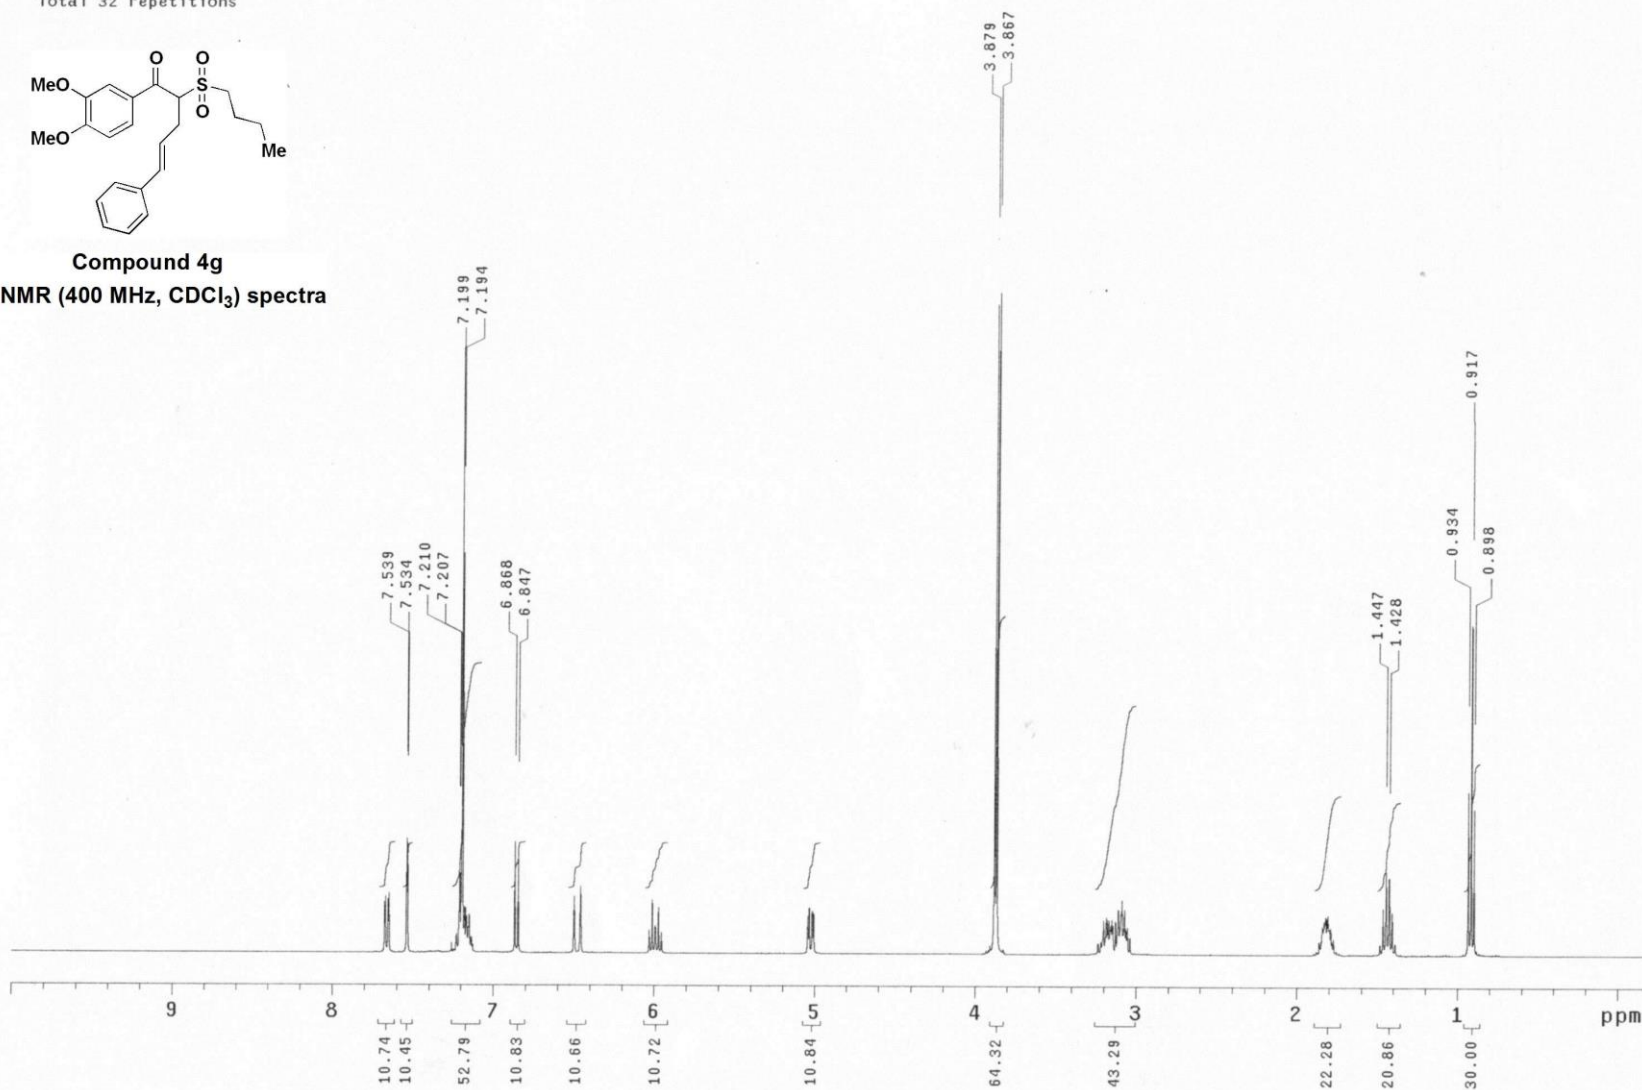

# Compound 4g (<sup>1</sup>H-NMR spectral data-2)

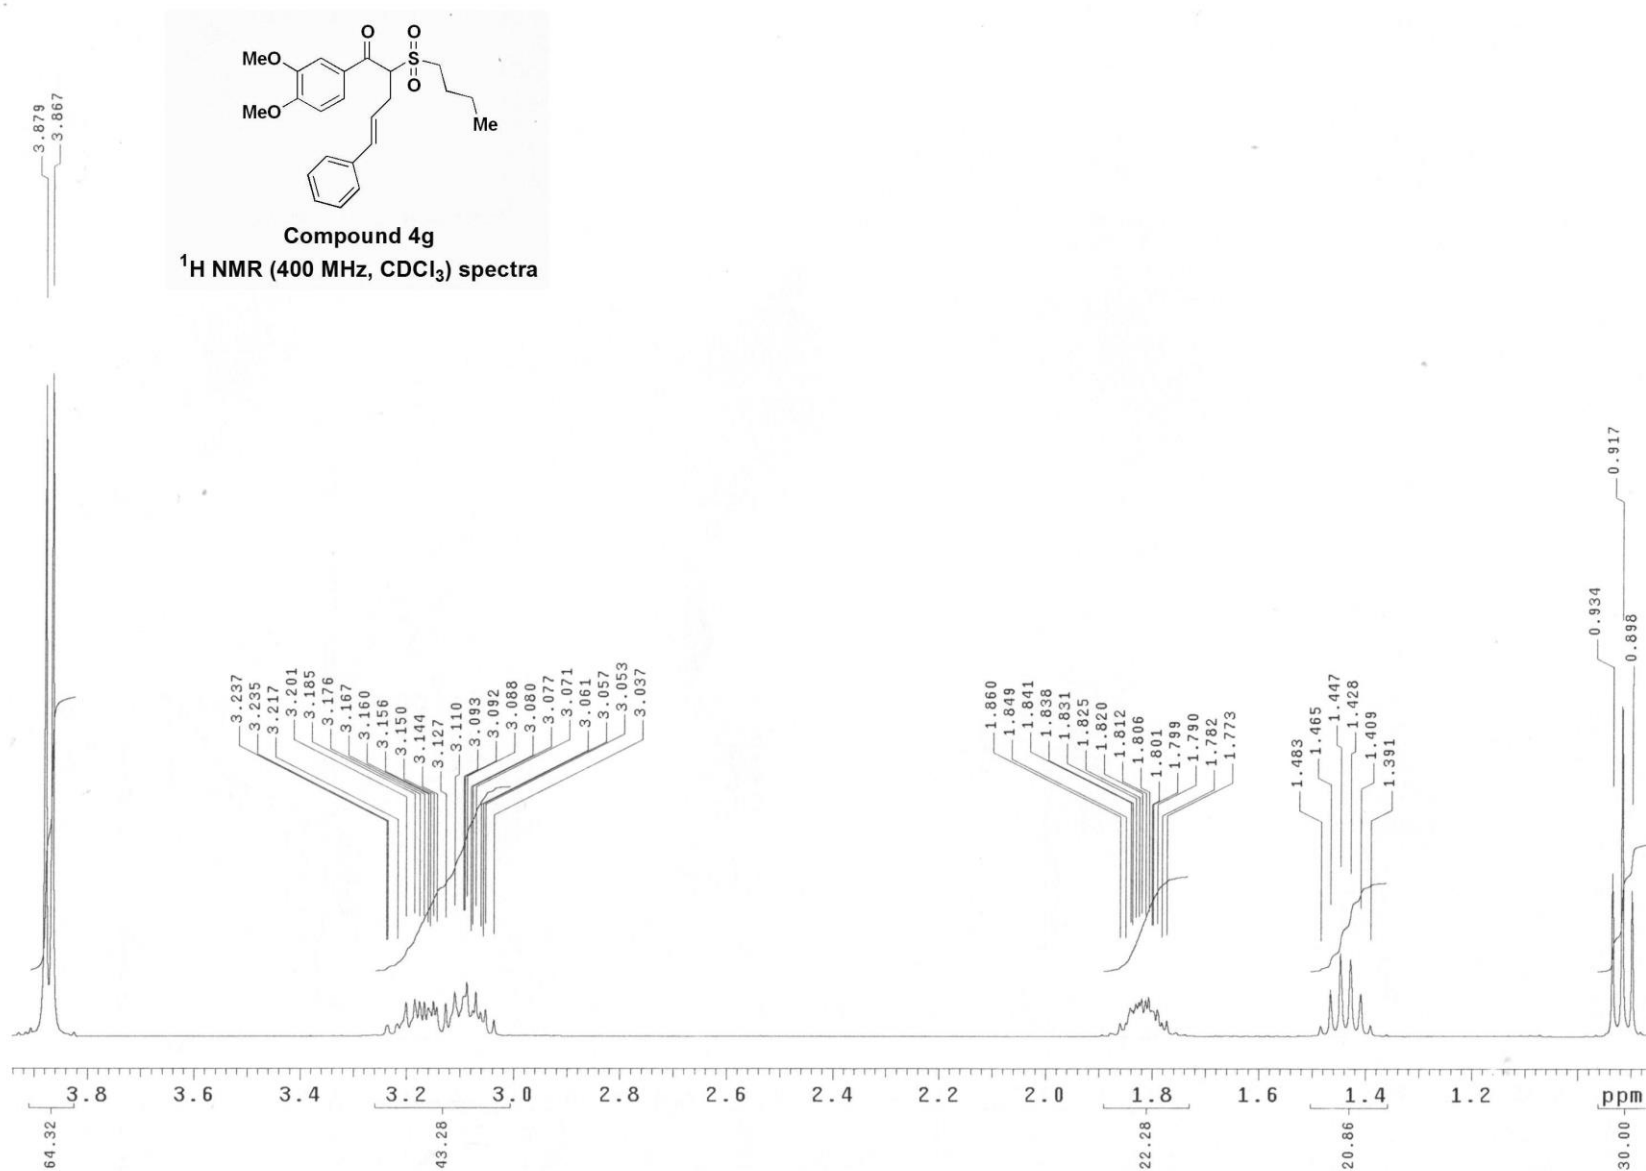

# Compound 4g (<sup>13</sup>C-NMR spectral data)

KSBUc

Pulse Sequence: s2pul

UNITYplus-400 "unity400"

Date: Nov 30 2018

Solvent: CDCl<sub>3</sub>

Ambient temperature

Total 320 repetitions

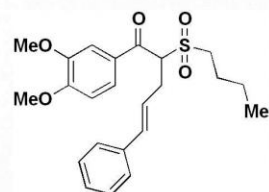

Compound 4g

<sup>13</sup>C NMR (100 MHz, CDCl<sub>3</sub>) spectra

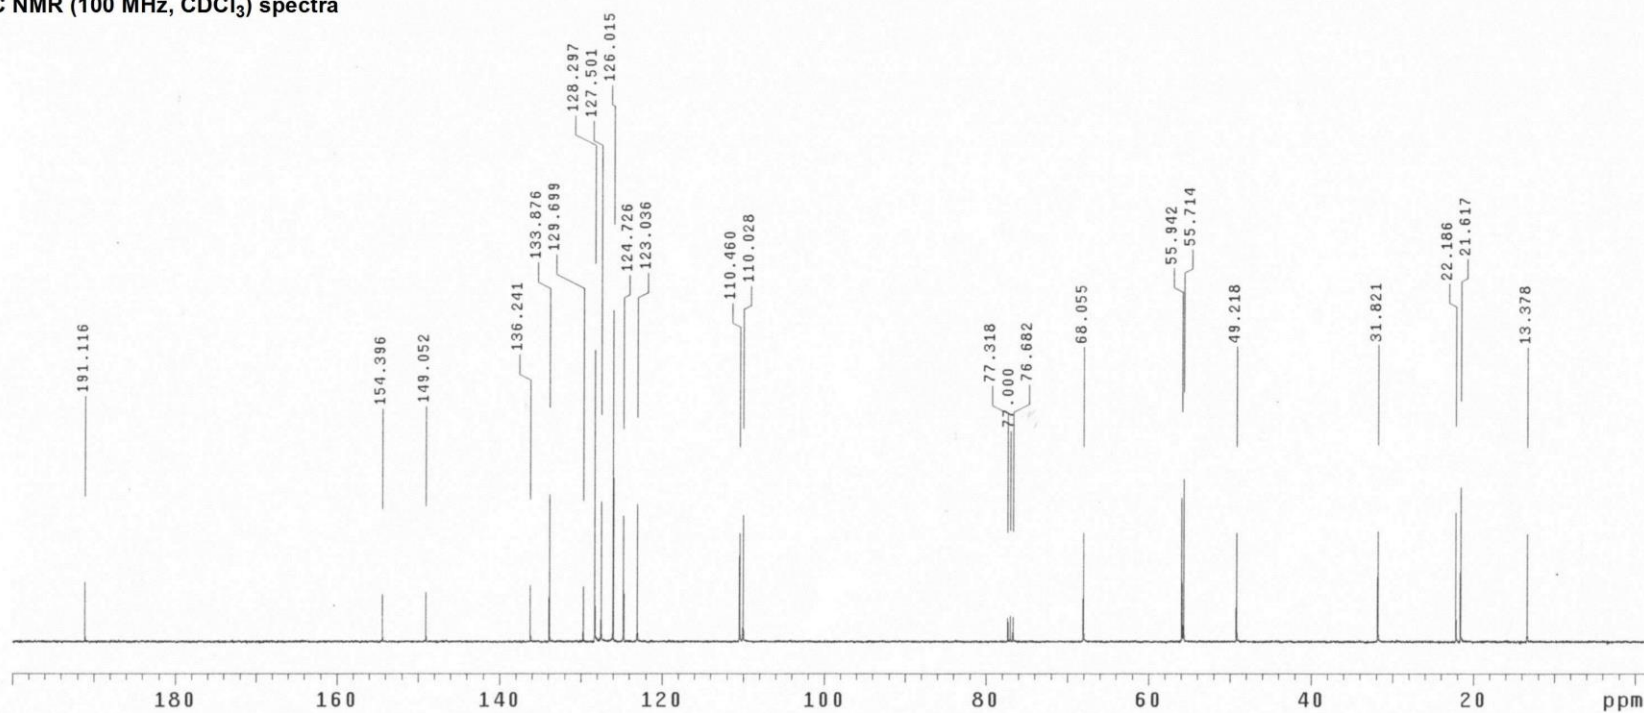

# Compound 4h (<sup>1</sup>H-NMR spectral data-1)

KSE1C

Pulse Sequence: s2pu1

UNITYplus-400 "unity400"

Date: Aug 29 2018

Solvent: CDCl<sub>3</sub>

Ambient temperature

Total 32 repetitions

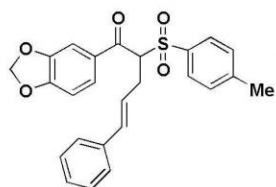

Compound 4h

<sup>1</sup>H NMR (400 MHz, CDCl<sub>3</sub>) spectra

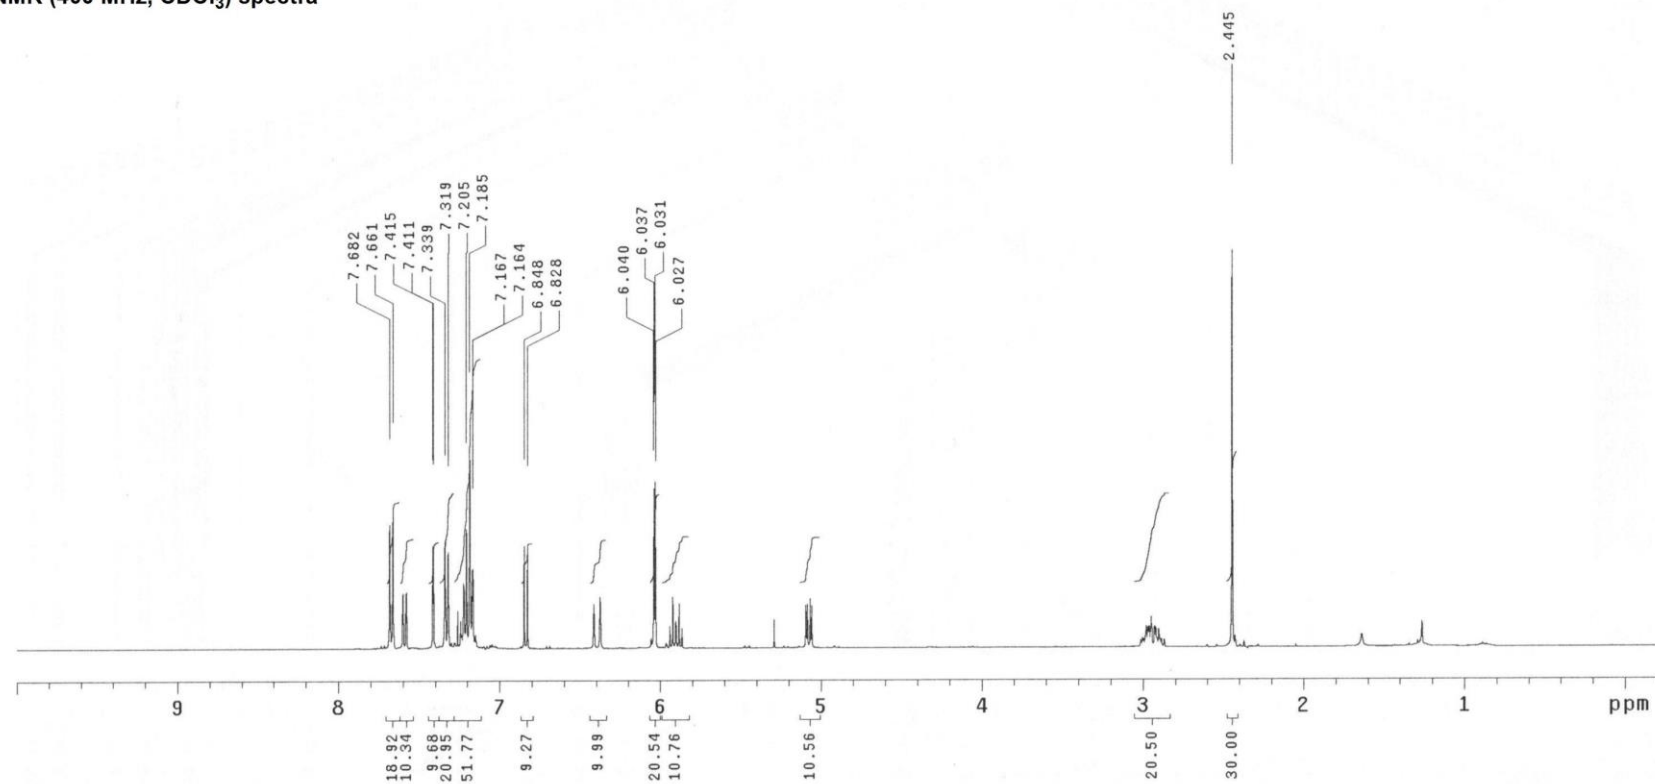

# Compound 4h (<sup>1</sup>H-NMR spectral data-2)

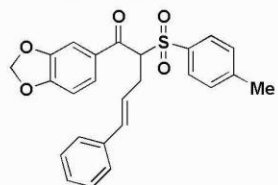

Compound 4h  
<sup>1</sup>H NMR (400 MHz, CDCl<sub>3</sub>) spectra

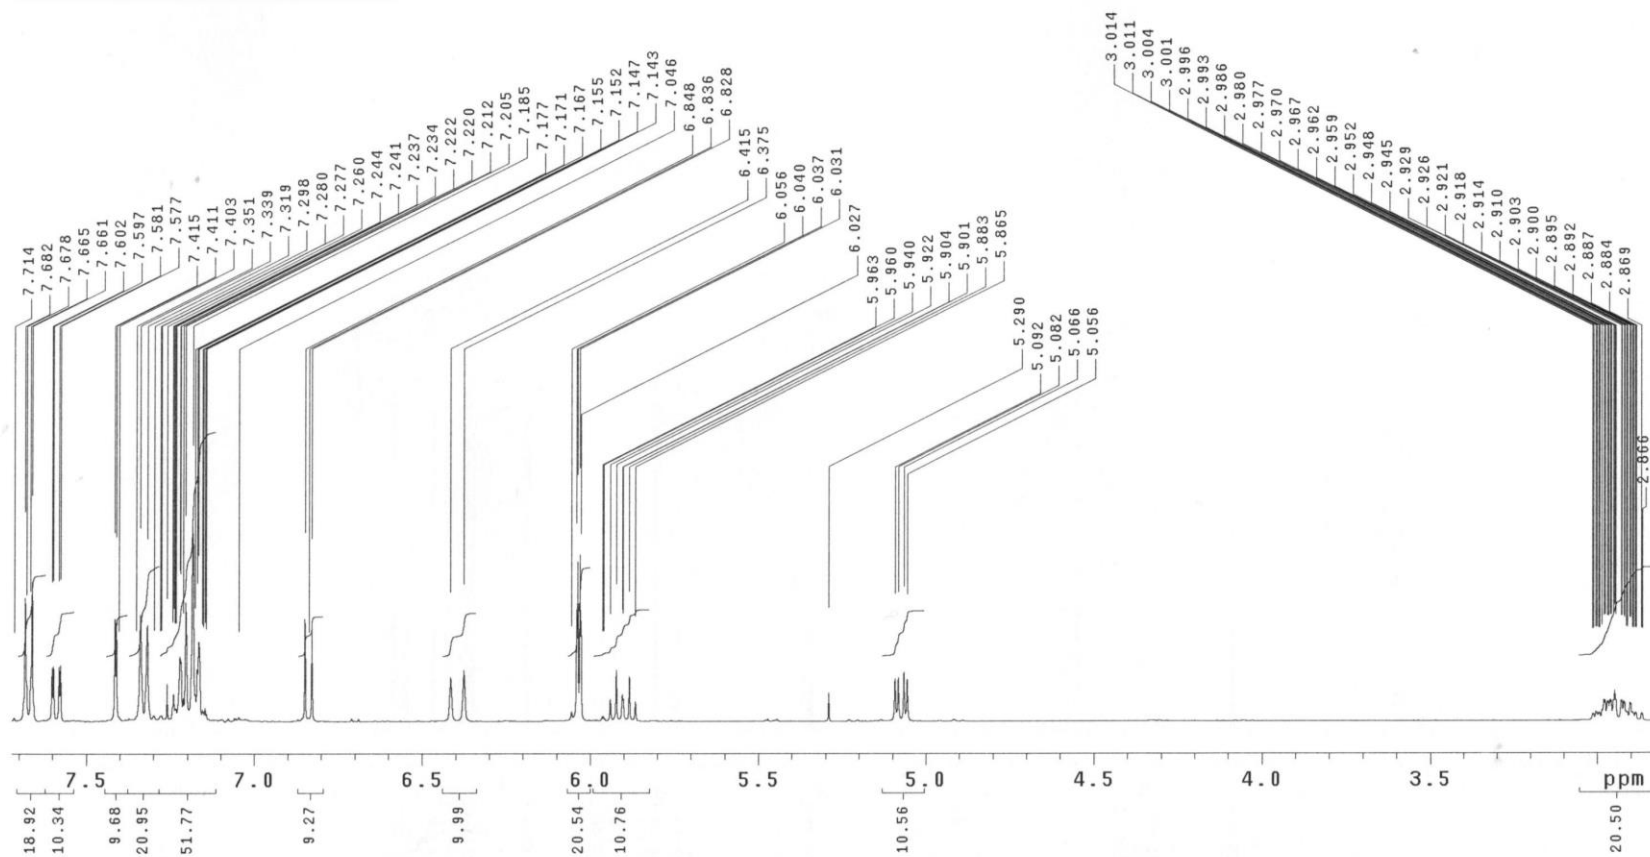

# Compound 4h (<sup>13</sup>C-NMR spectral data)

KSE1C

Pulse Sequence: s2pu1

UNITYplus-400 "unity400"

Date: Aug 29 2018

Solvent: CDCl<sub>3</sub>

Ambient temperature

Total 1024 repetitions

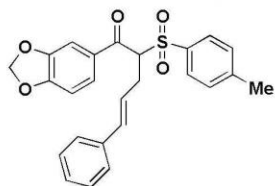

Compound 4h

<sup>13</sup>C NMR (100 MHz, CDCl<sub>3</sub>) spectra

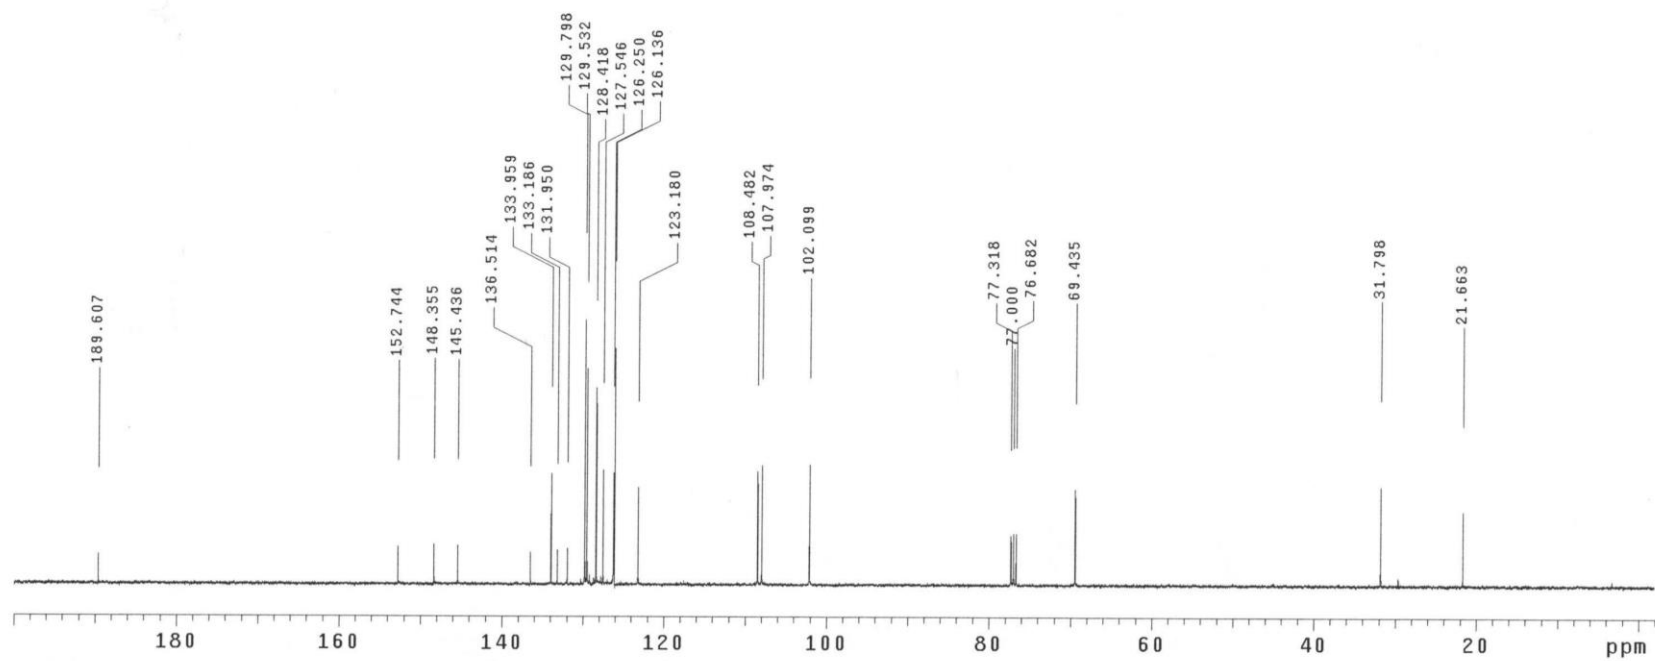

# Compound 4i (<sup>1</sup>H-NMR spectral data-1)

KSE5C

Pulse Sequence: s2pu1

UNITYplus-400 "unity400"

Date: Sep 11 2018

Solvent: CDCl<sub>3</sub>

Ambient temperature

Total 32 repetitions

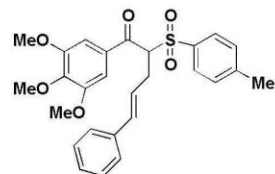

Compound 4i

<sup>1</sup>H NMR (400 MHz, CDCl<sub>3</sub>) spectra

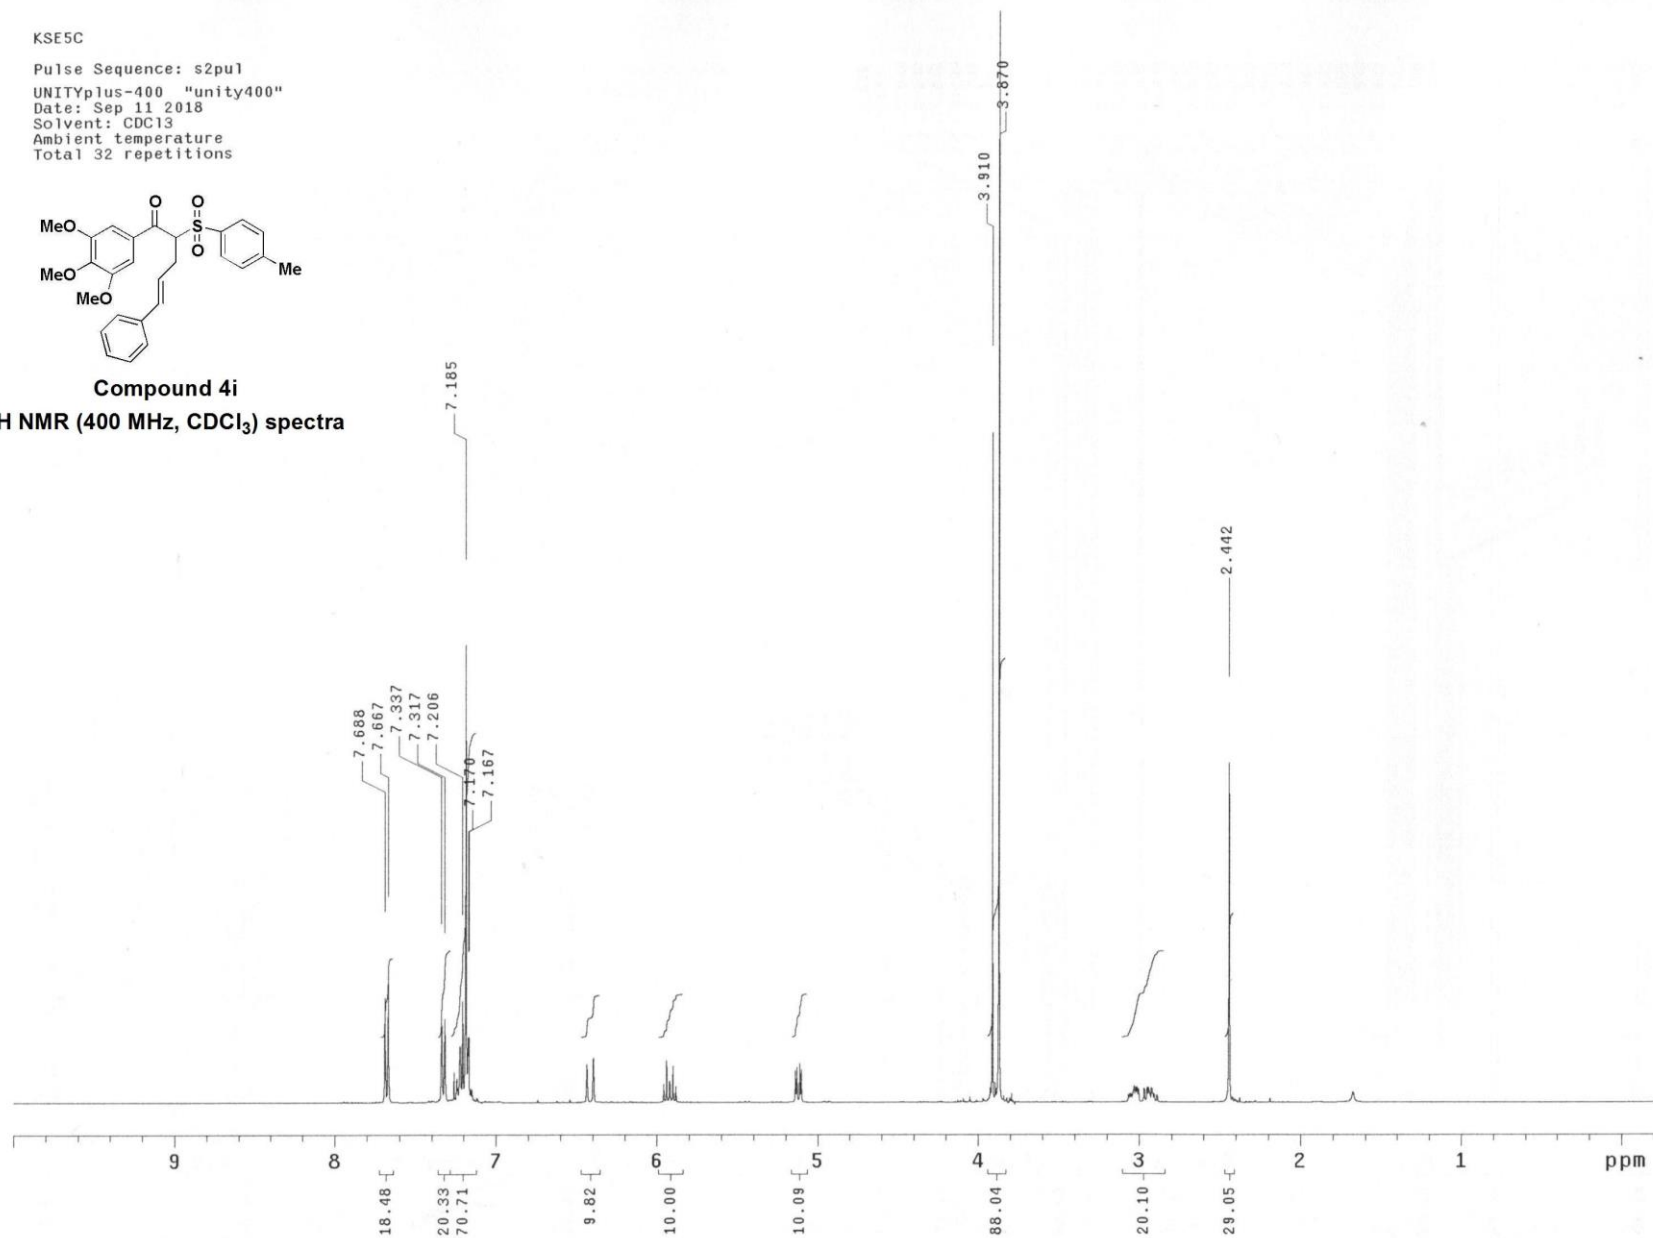

# Compound 4i (<sup>1</sup>H-NMR spectral data-2)

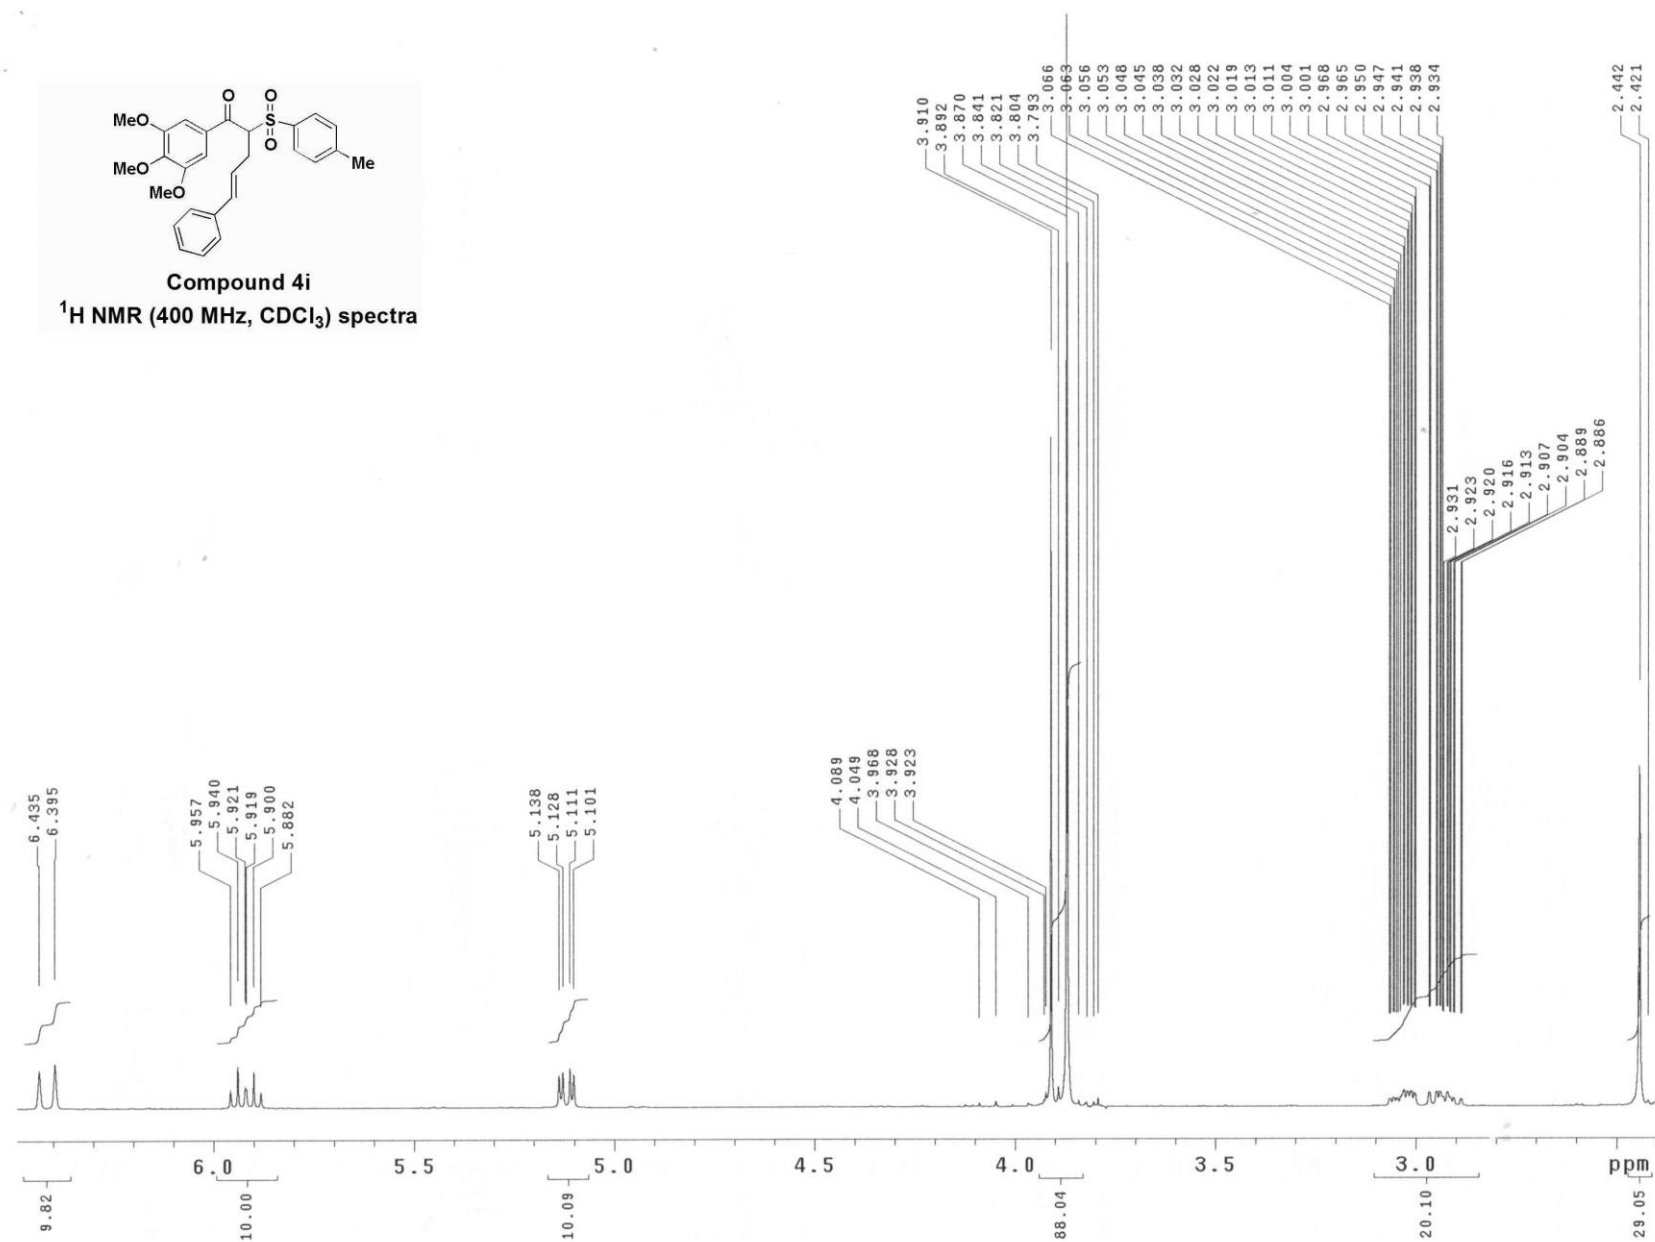

# Compound 4i (<sup>13</sup>C-NMR spectral data)

KSE5C

Pulse Sequence: s2pu1

UNITYplus-400 "unity400"

Date: Sep 11 2018

Solvent: CDCl<sub>3</sub>

Ambient temperature

Total 1360 repetitions

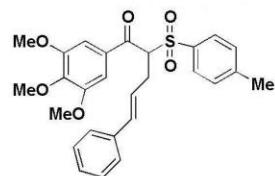

Compound 4i

<sup>13</sup>C NMR (100 MHz, CDCl<sub>3</sub>) spectra

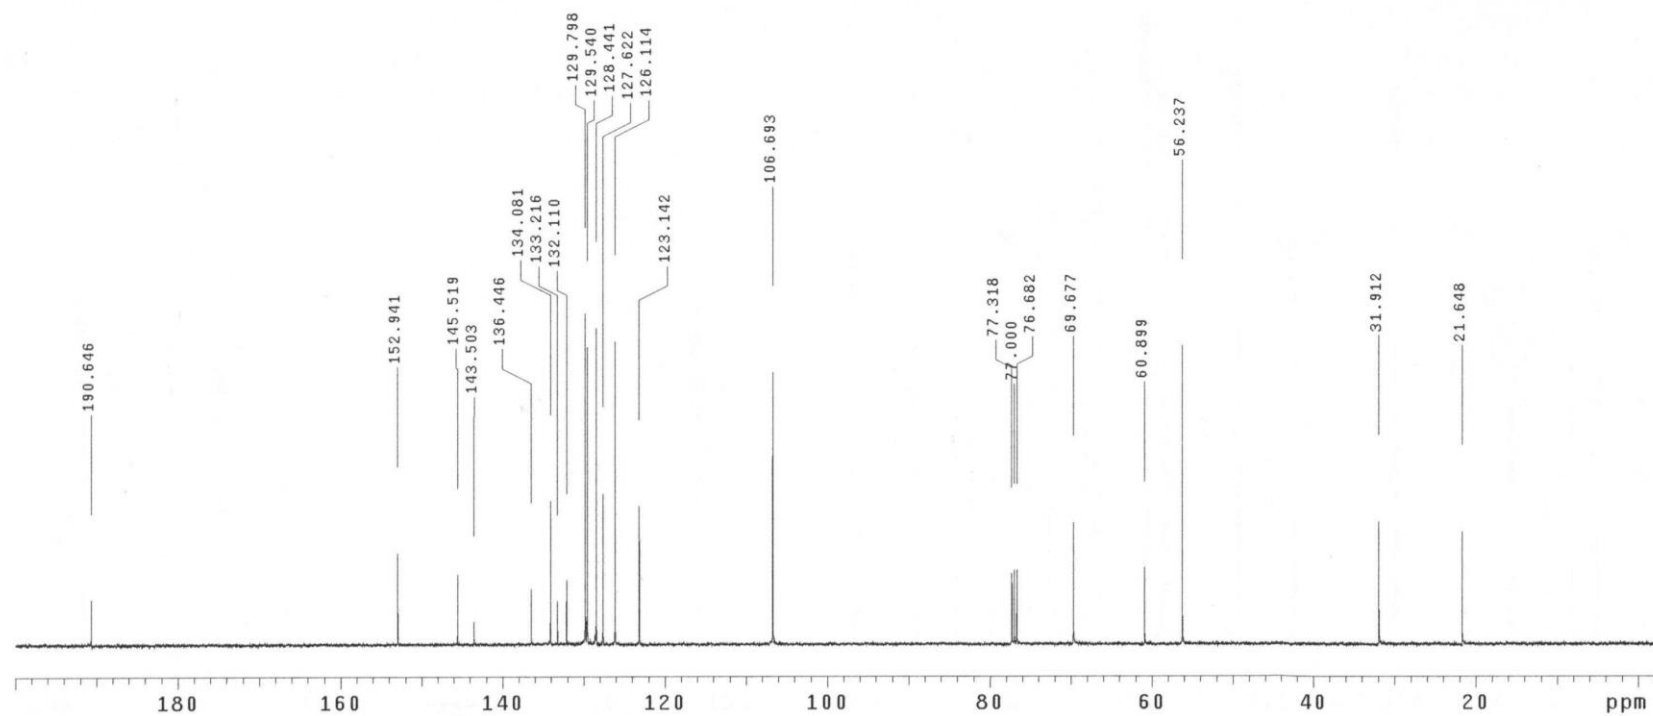

# Compound 4j (<sup>1</sup>H-NMR spectral data-1)

KS30BSc

Pulse Sequence: s2pu1  
 UNITYplus-400 "unity400"  
 Date: Feb 11 2019  
 Solvent: CDCl<sub>3</sub>  
 Ambient temperature  
 Total 32 repetitions

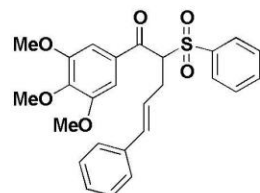

Compound 4j

<sup>1</sup>H NMR (400 MHz, CDCl<sub>3</sub>) spectra

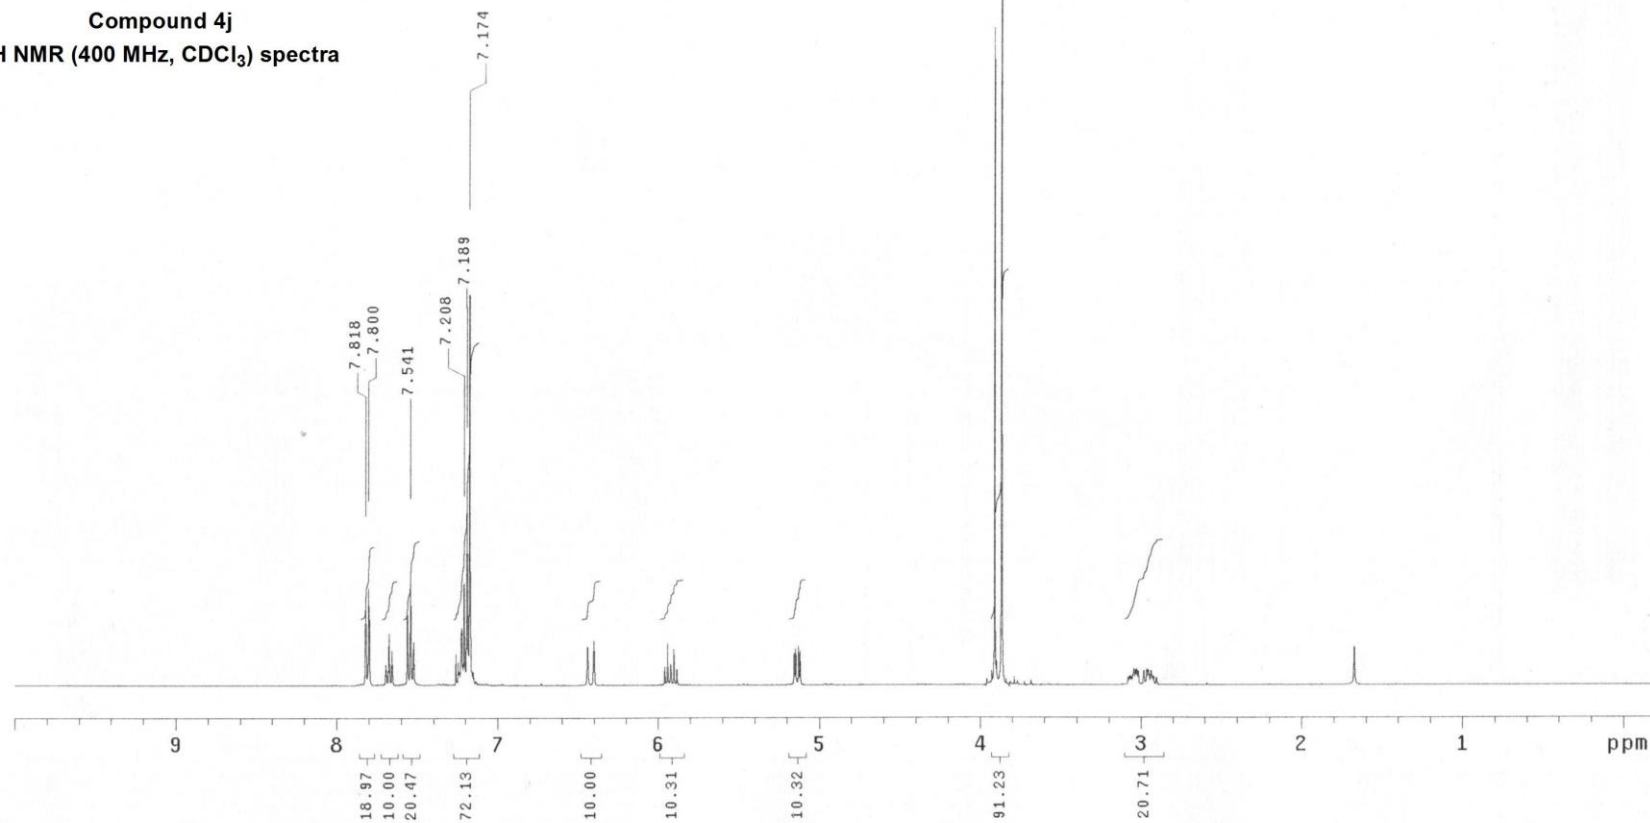

# Compound 4j (<sup>1</sup>H-NMR spectral data-2)

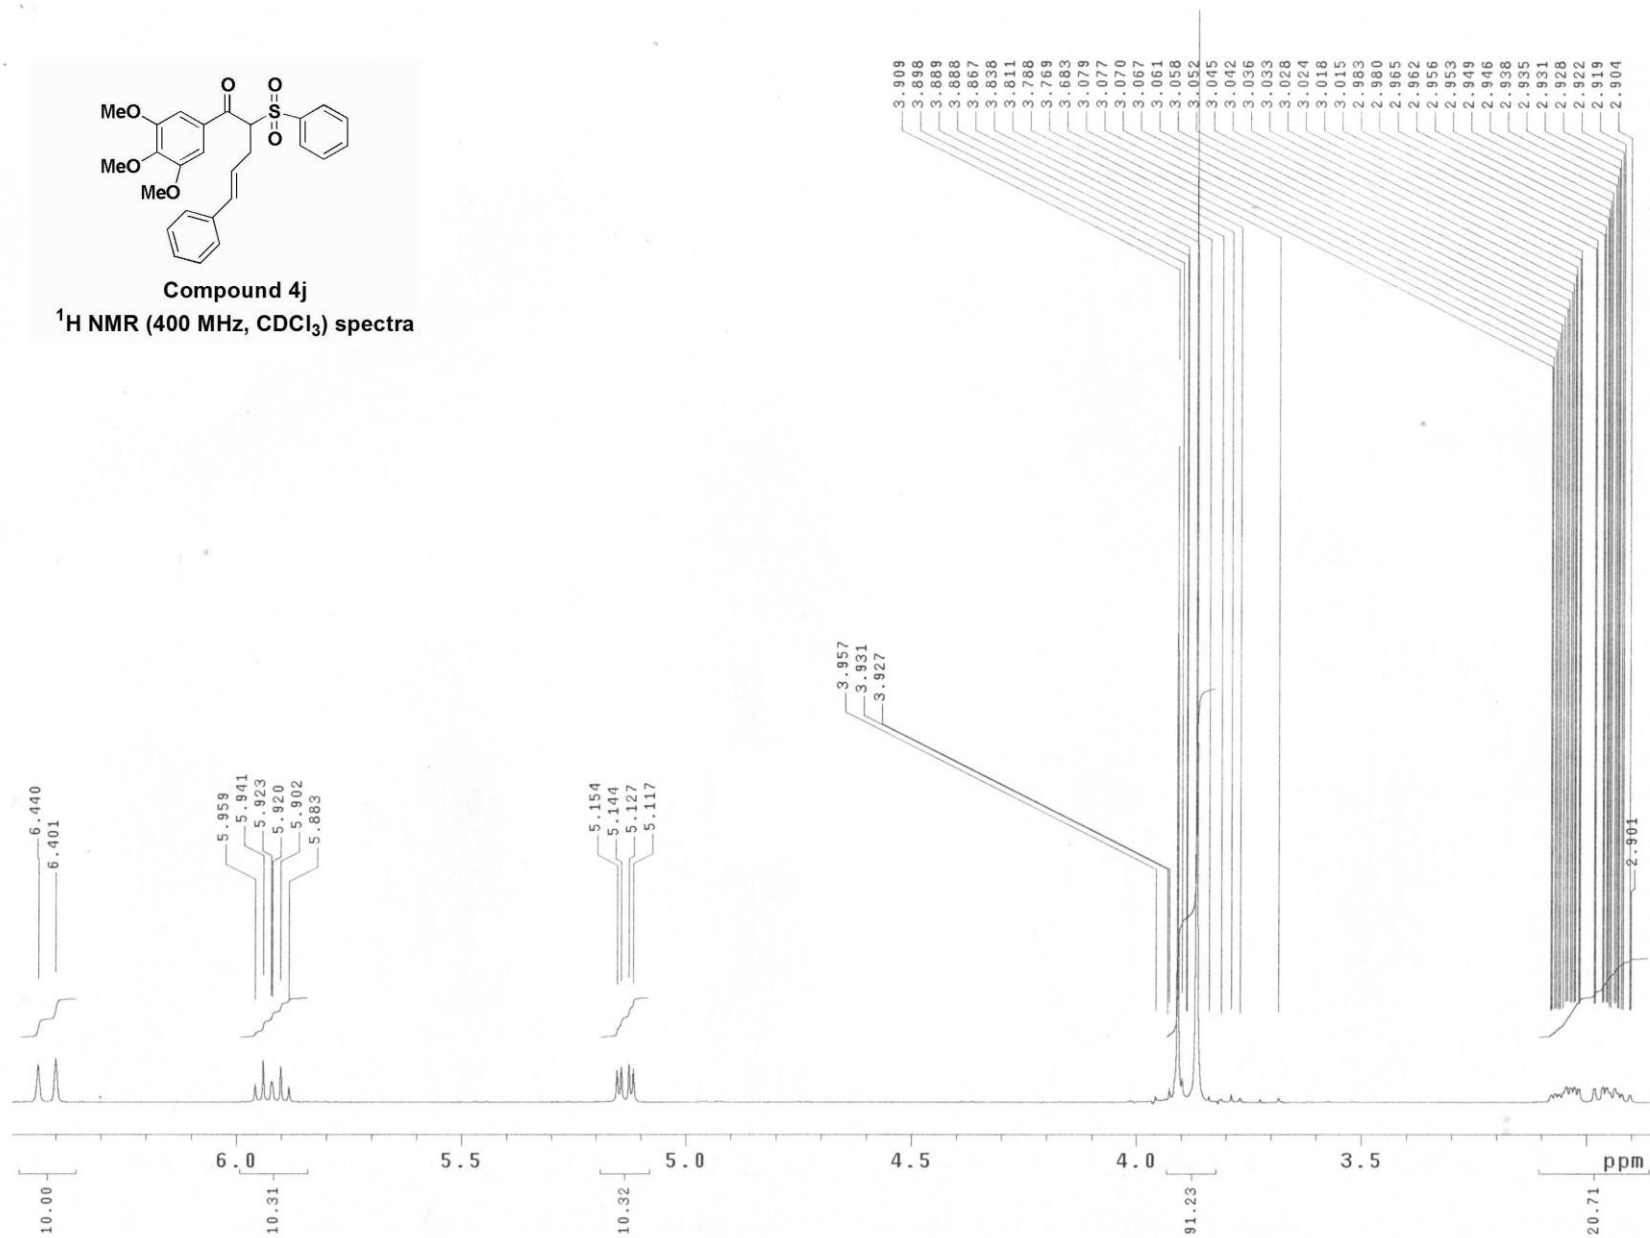

# Compound 4j (<sup>13</sup>C-NMR spectral data)

Pulse Sequence: s2pu1  
 UNITYplus-400 "unity400"  
 Date: Feb 11 2019  
 Solvent: CDCl<sub>3</sub>  
 Ambient temperature  
 Total 1424 repetitions

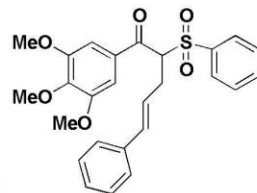

Compound 4j

<sup>13</sup>C NMR (100 MHz, CDCl<sub>3</sub>) spectra

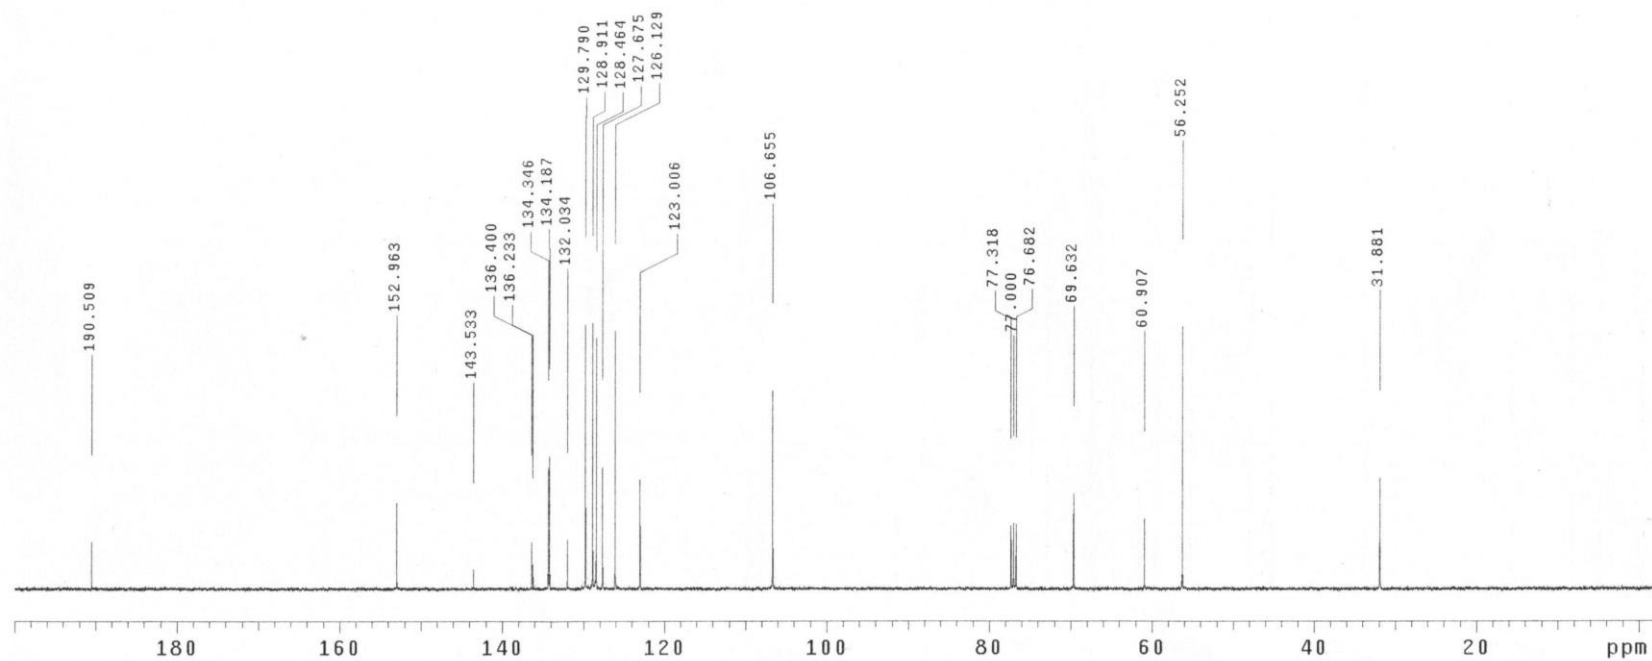

# Compound 4k (<sup>1</sup>H-NMR spectral data-1)

KS30MsC

Pulse Sequence: s2pu1

UNITYplus-400 "unity400"

Date: Jan 30 2019

Solvent: CDCl<sub>3</sub>

Ambient temperature

Total 32 repetitions

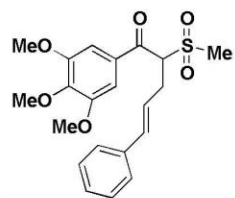

Compound 4k

<sup>1</sup>H NMR (400 MHz, CDCl<sub>3</sub>) spectra

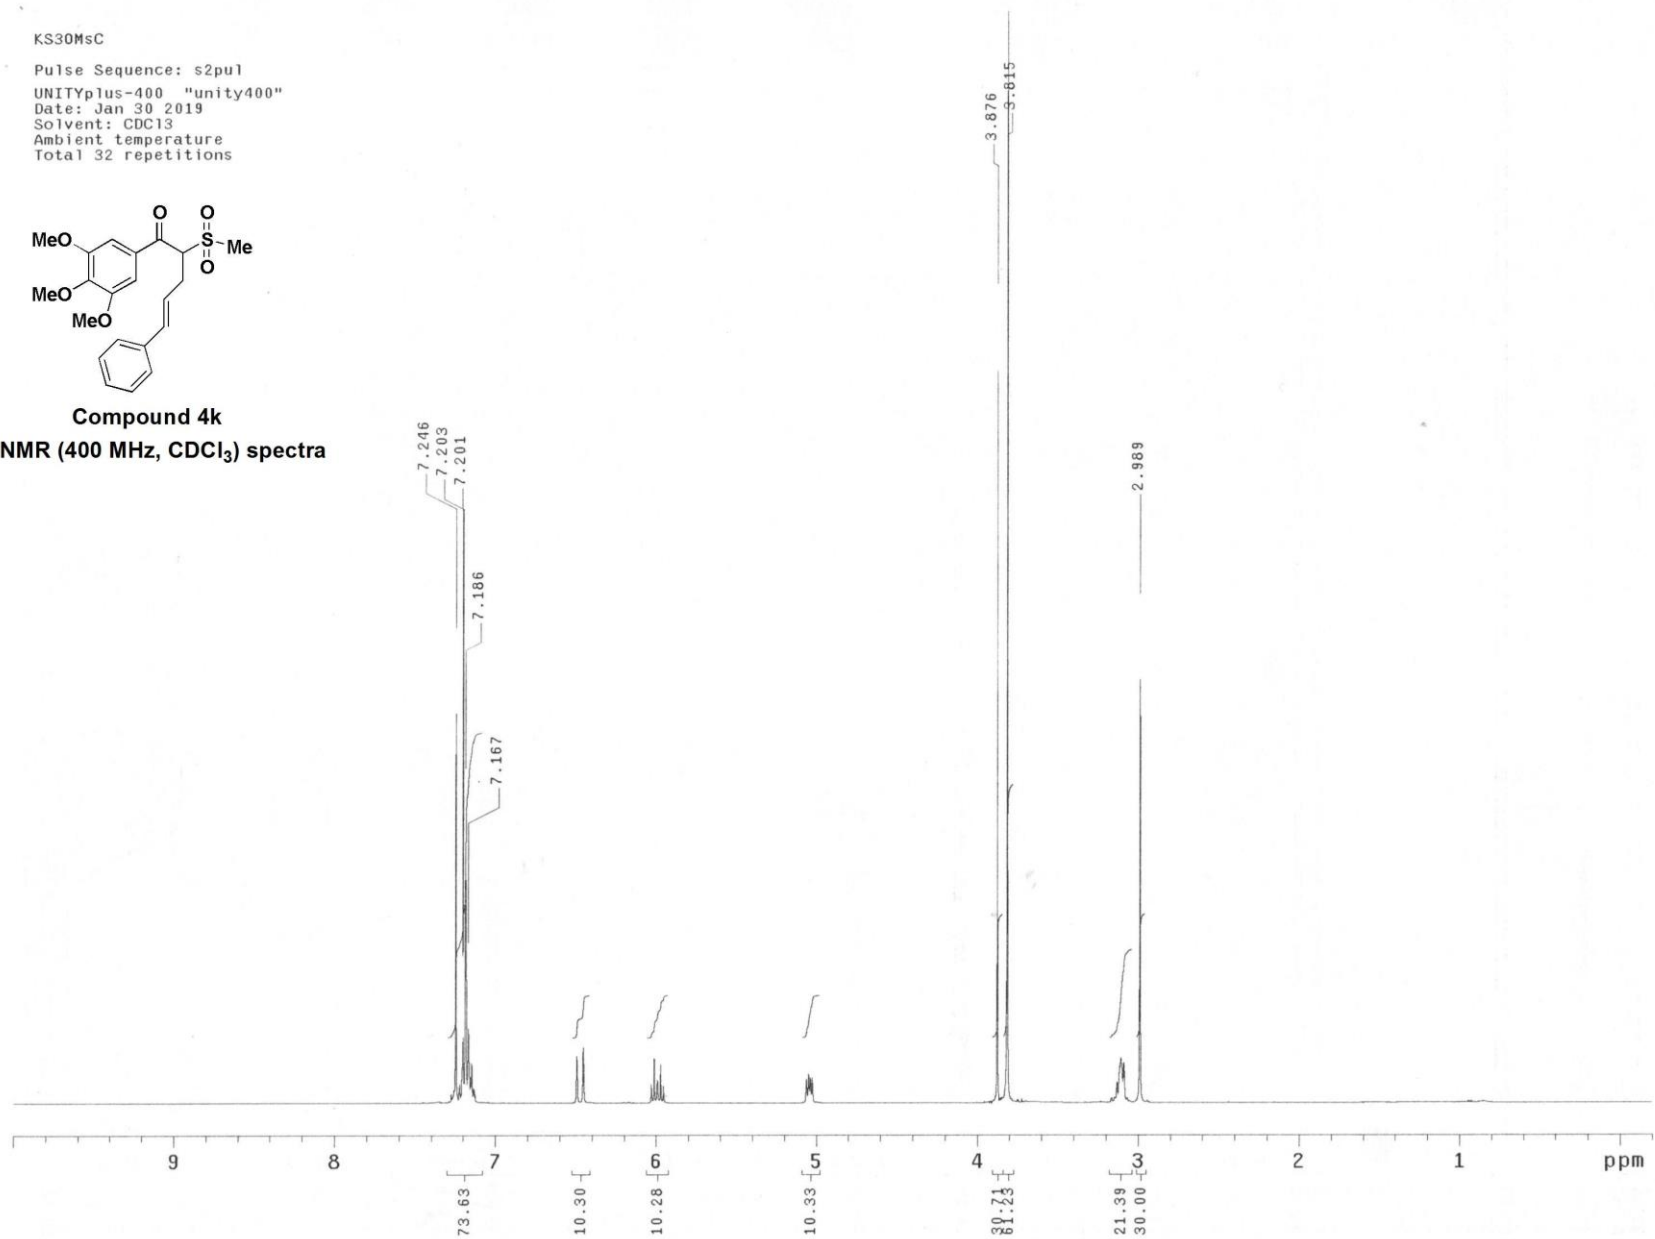

# Compound 4k (<sup>1</sup>H-NMR spectral data-2)

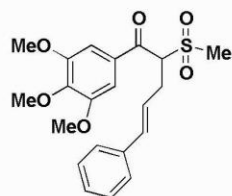

Compound 4k

<sup>1</sup>H NMR (400 MHz, CDCl<sub>3</sub>) spectra

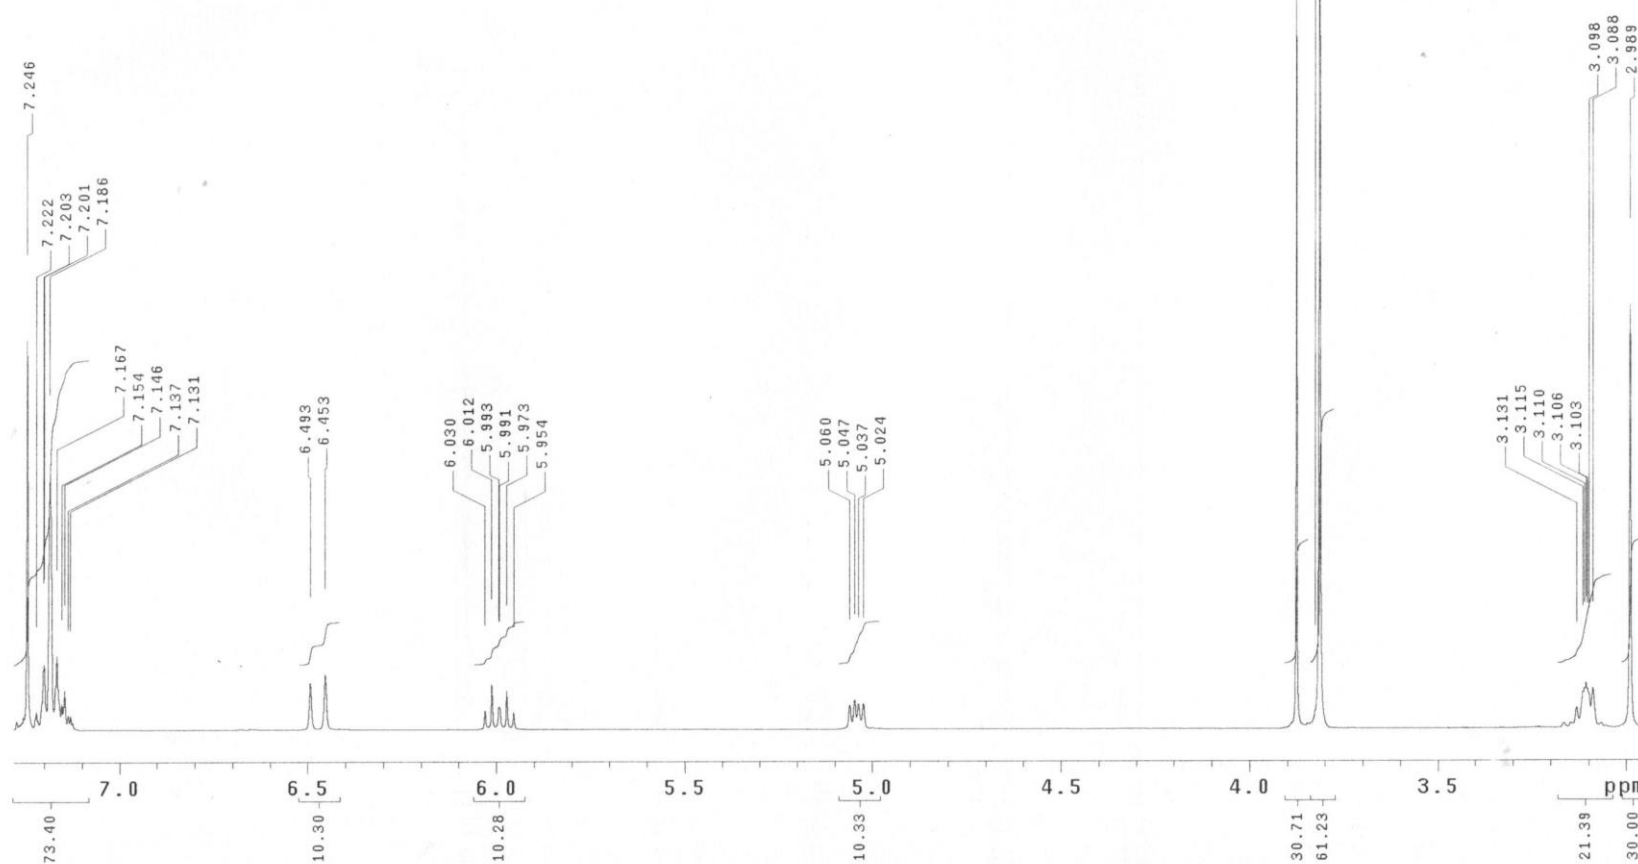

# Compound 4k (<sup>13</sup>C-NMR spectral data)

KS30MsC

Pulse Sequence: s2pu1

UNITYplus-400 "unity400"

Date: Jan 30 2019

Solvent: CDCl<sub>3</sub>

Ambient temperature

Total 368 repetitions

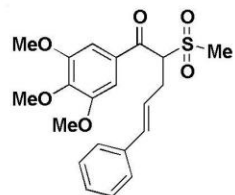

Compound 4k

<sup>13</sup>C NMR (100 MHz, CDCl<sub>3</sub>) spectra

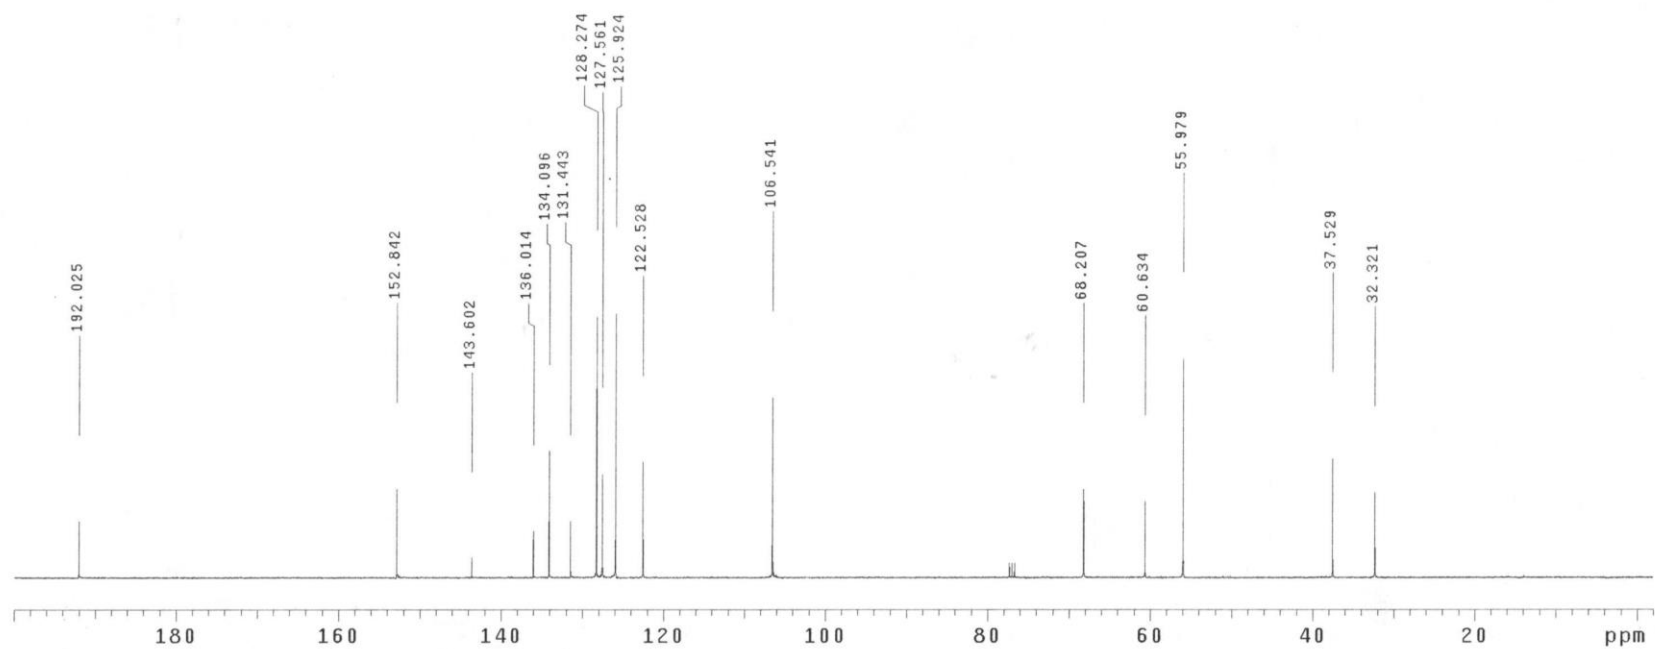

# Compound 4I (<sup>1</sup>H-NMR spectral data-1)

KSE2C

Pulse Sequence: s2pu1

UNITYplus-400 "unity400"

Date: Aug 29 2018

Solvent: CDCl<sub>3</sub>

Ambient temperature

Total 32 repetitions

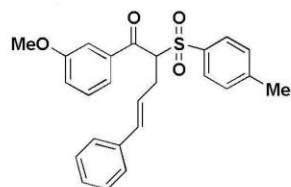

Compound 4I

<sup>1</sup>H NMR (400 MHz, CDCl<sub>3</sub>) spectra

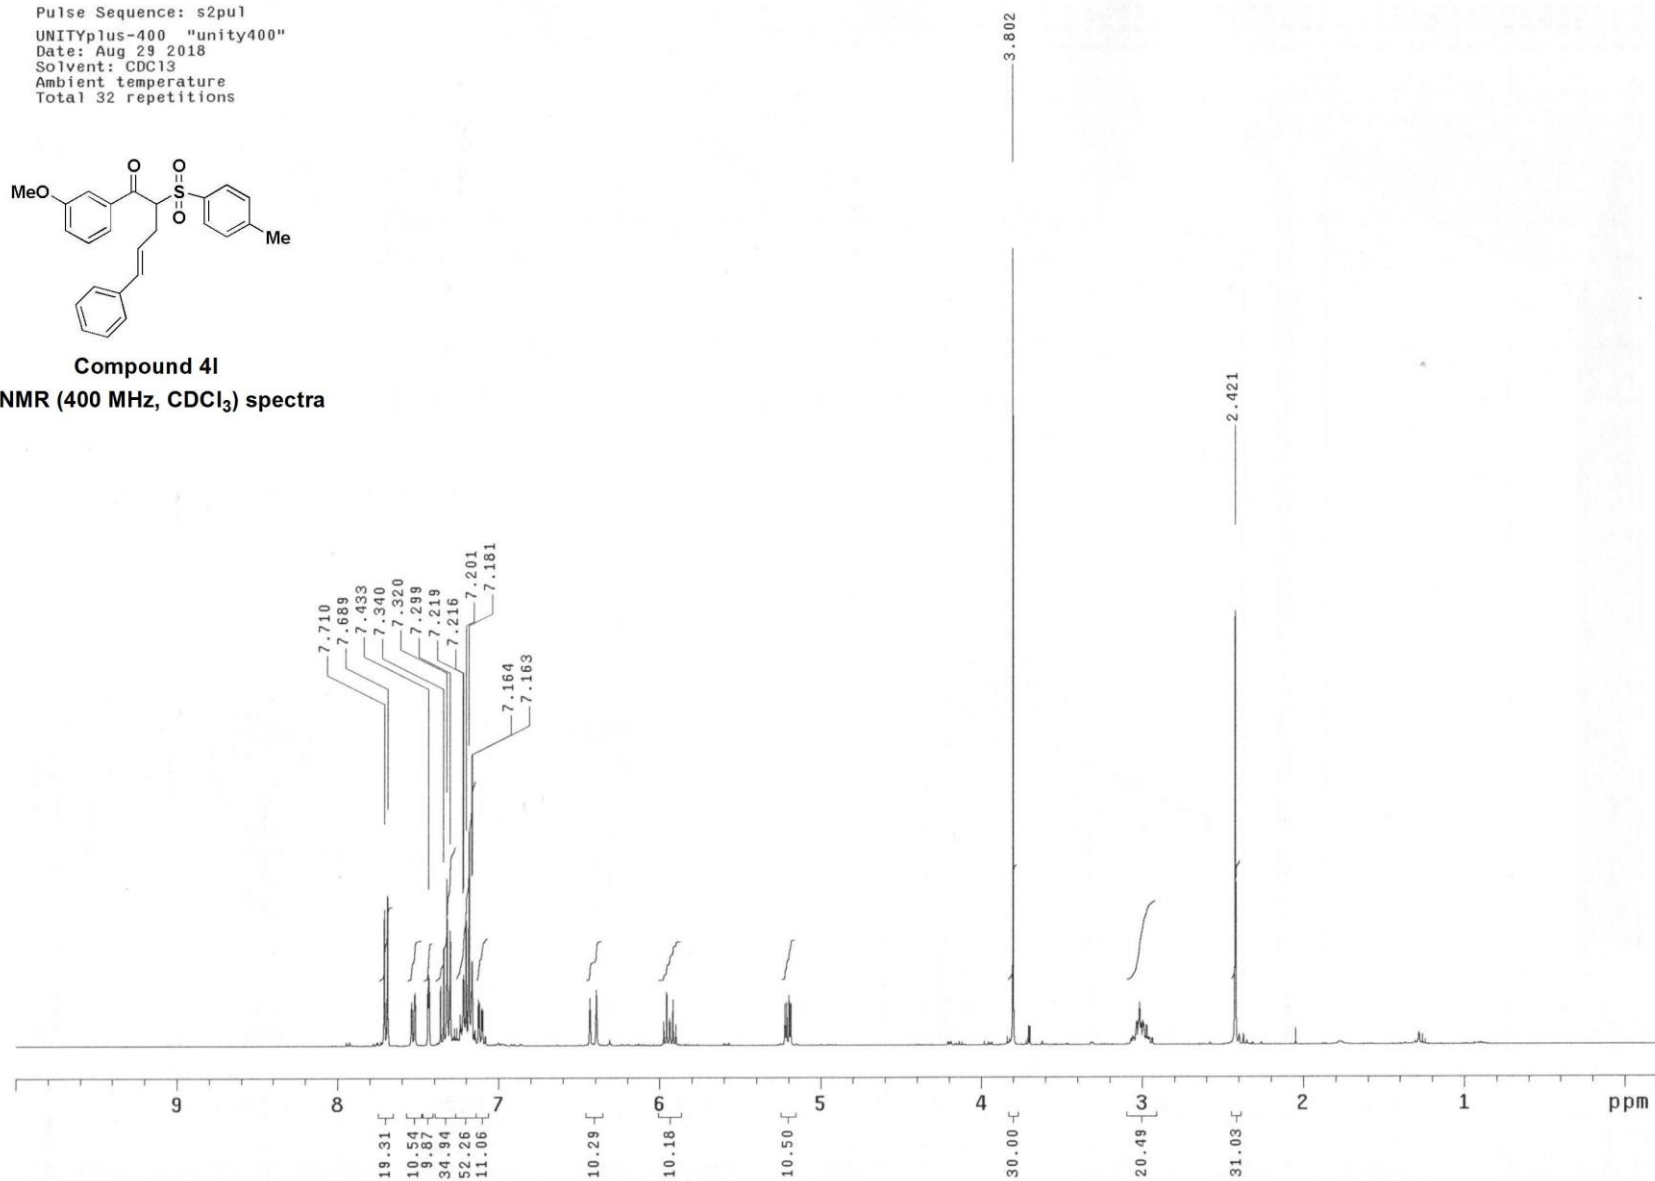

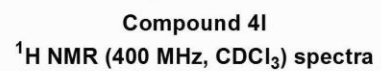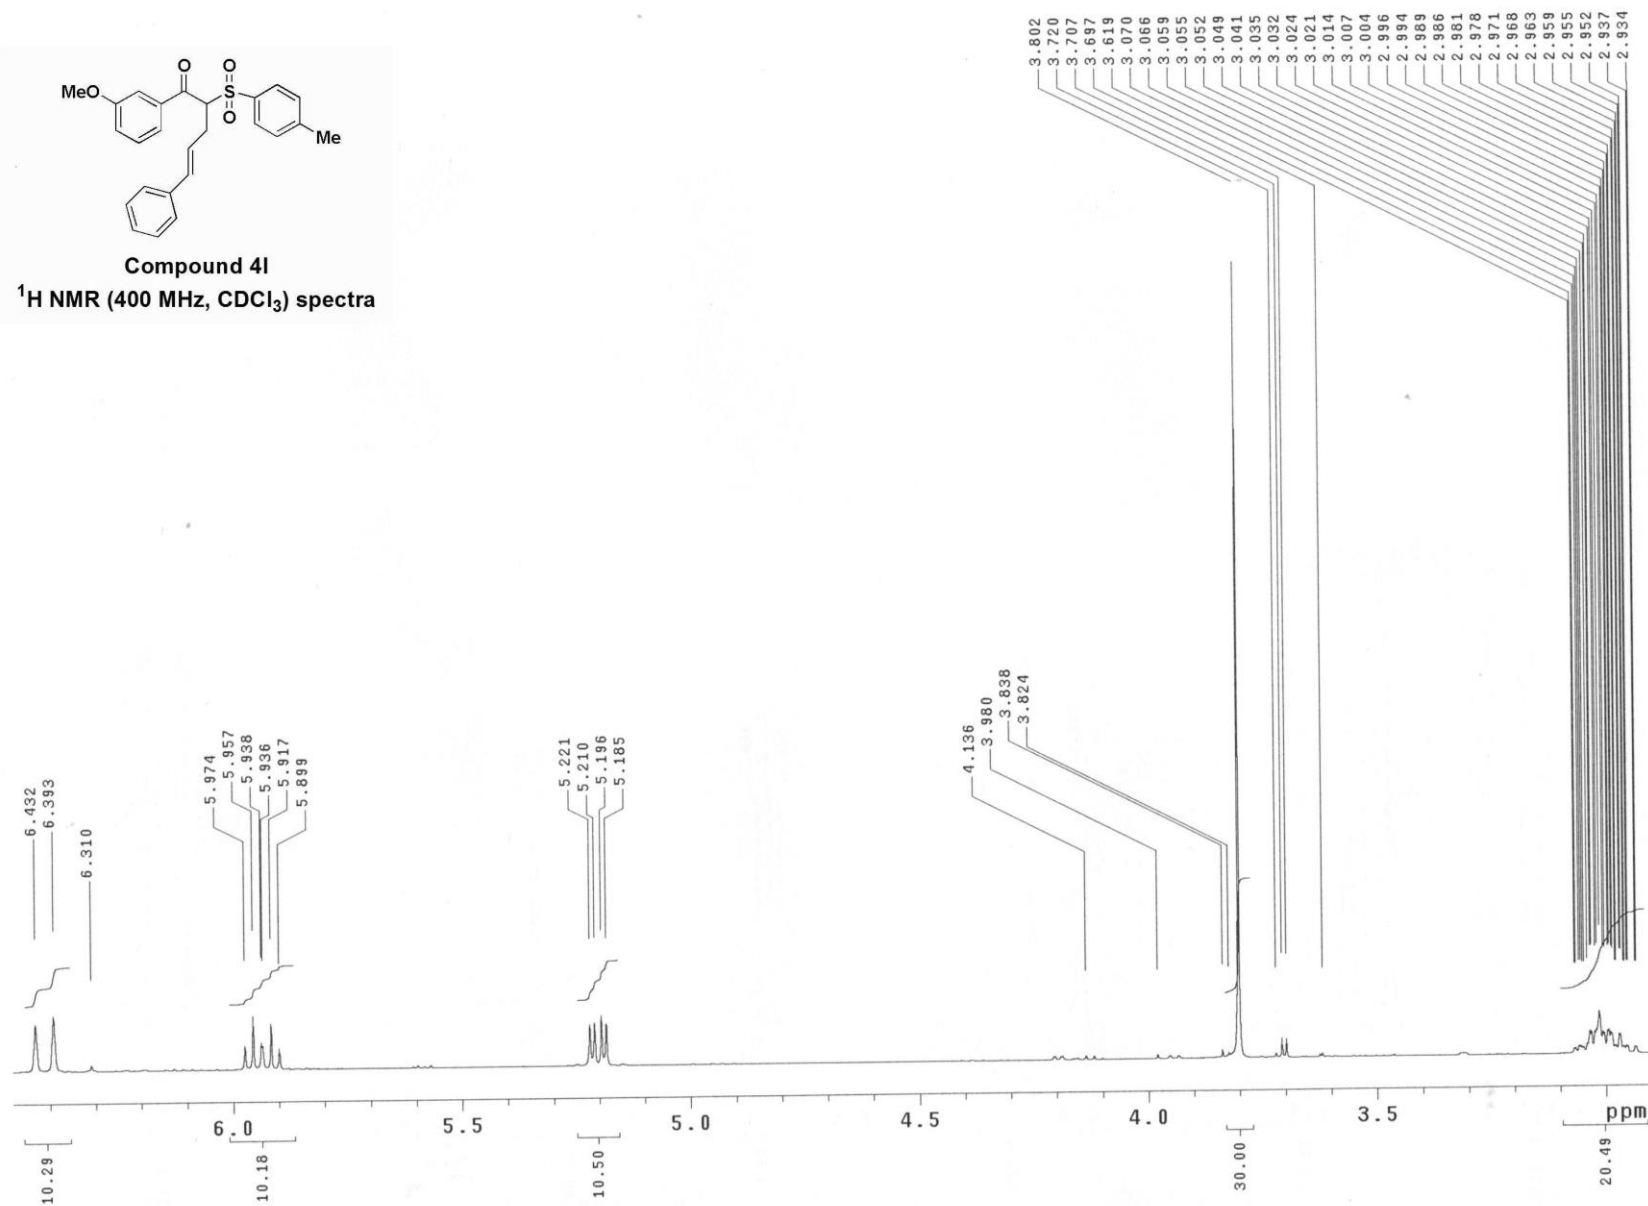

# Compound 4I (<sup>13</sup>C-NMR spectral data)

KSE2C

Pulse Sequence: s2pu1

UNITYplus-400 "unity400"

Date: Aug 29 2018

Solvent: CDCl<sub>3</sub>

Ambient temperature

Total 1024 repetitions

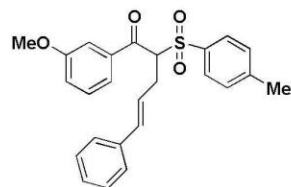

Compound 4I

<sup>13</sup>C NMR (100 MHz, CDCl<sub>3</sub>) spectra

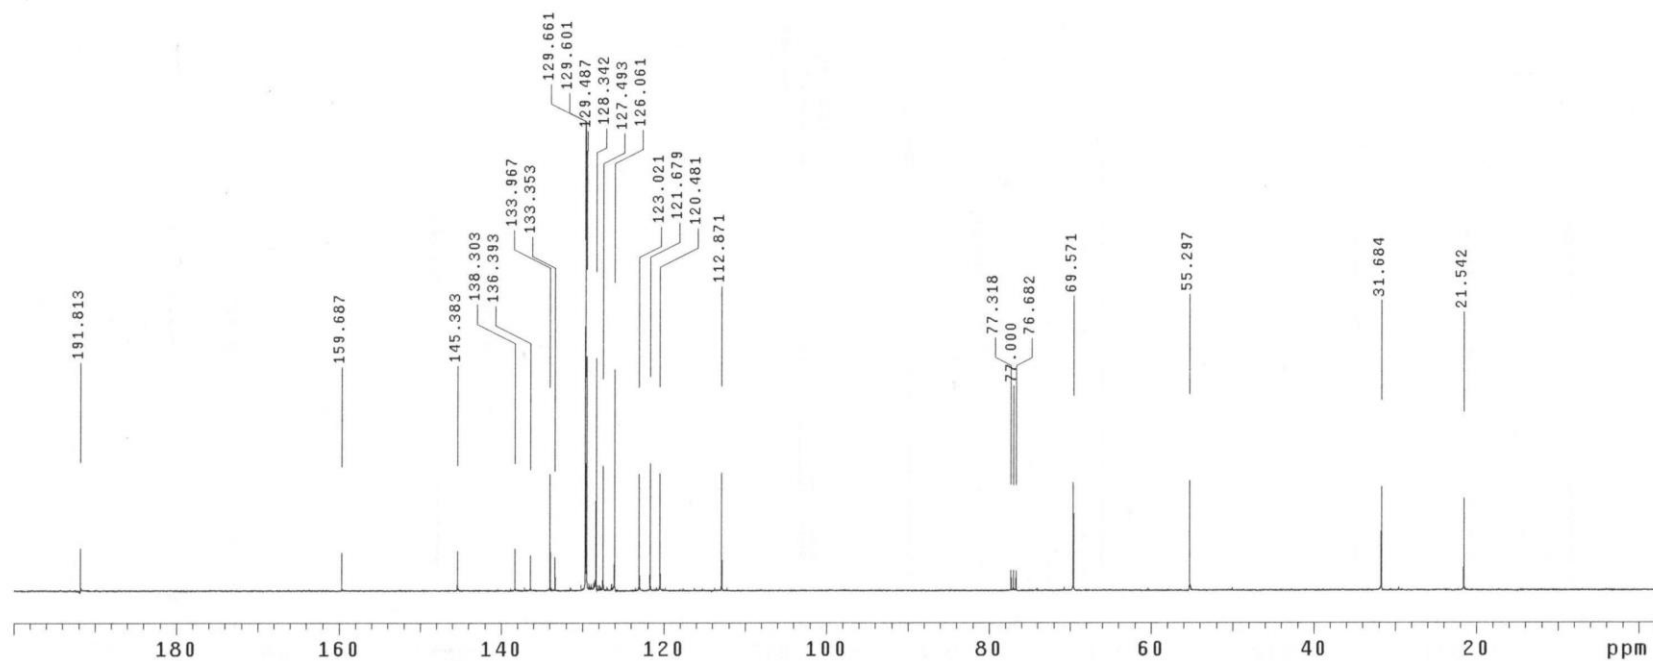

# Compound 4m (<sup>1</sup>H-NMR spectral data-1)

KSE4C

Pulse Sequence: s2pu1

UNITYplus-400 "unity400"

Date: Sep 4 2018

Solvent: CDCl<sub>3</sub>

Ambient temperature

Total 32 repetitions

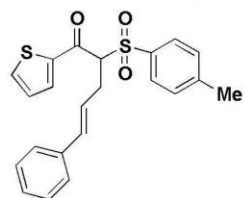

Compound 4m

<sup>1</sup>H NMR (400 MHz, CDCl<sub>3</sub>) spectra

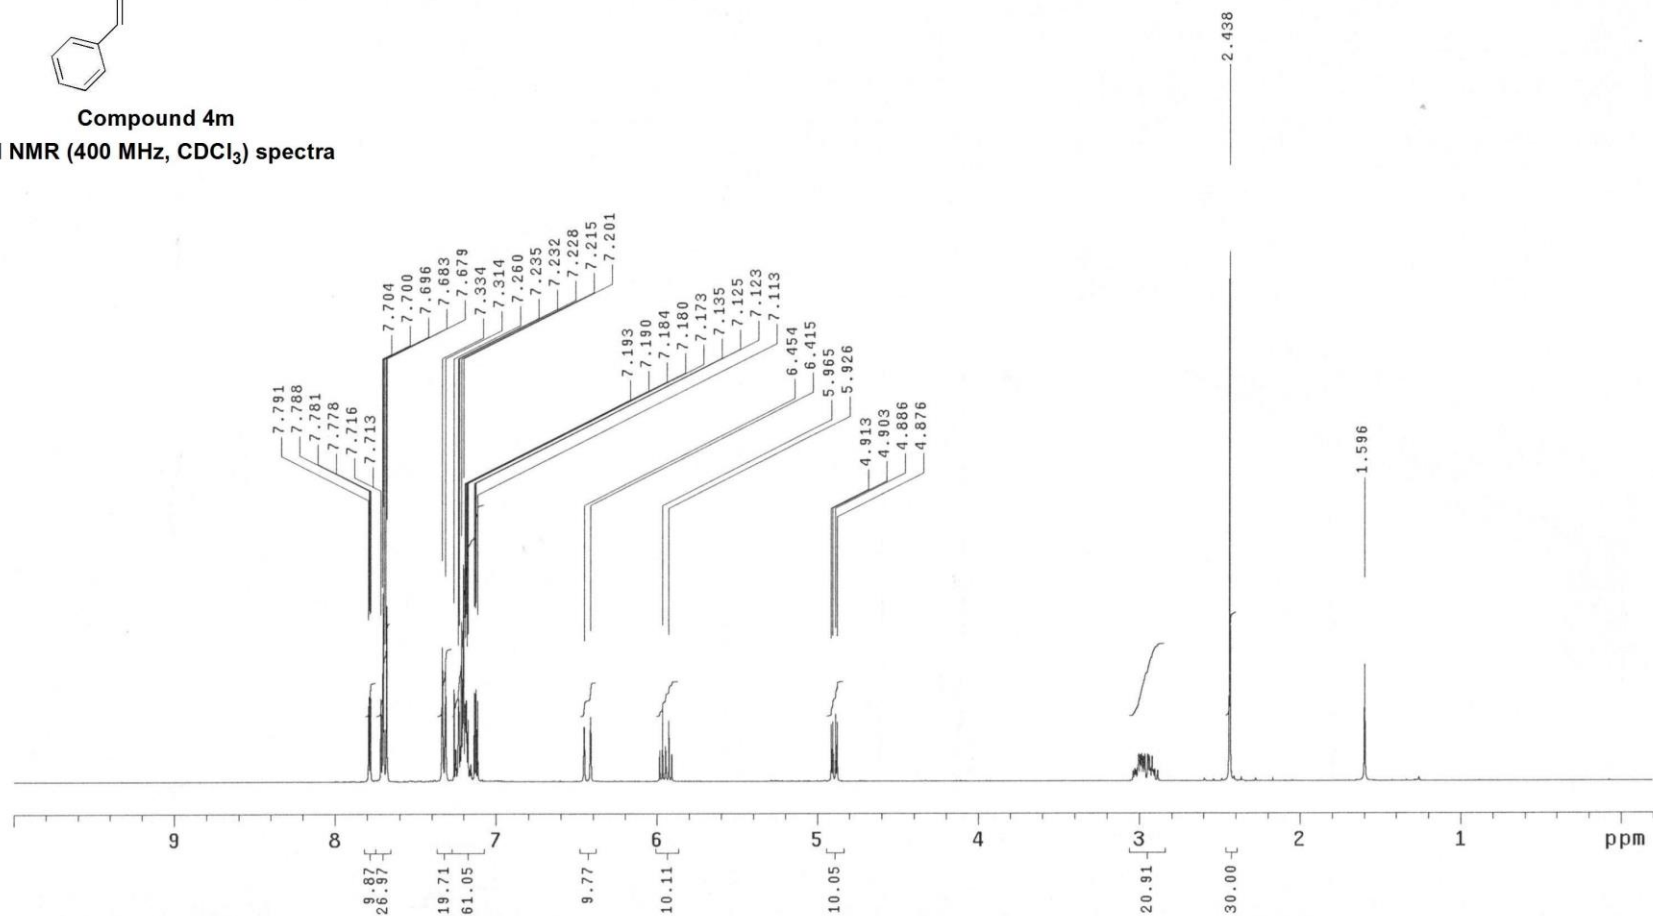

# Compound 4m (<sup>1</sup>H-NMR spectral data-2)

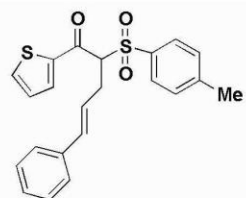

Compound 4m  
<sup>1</sup>H NMR (400 MHz, CDCl<sub>3</sub>) spectra

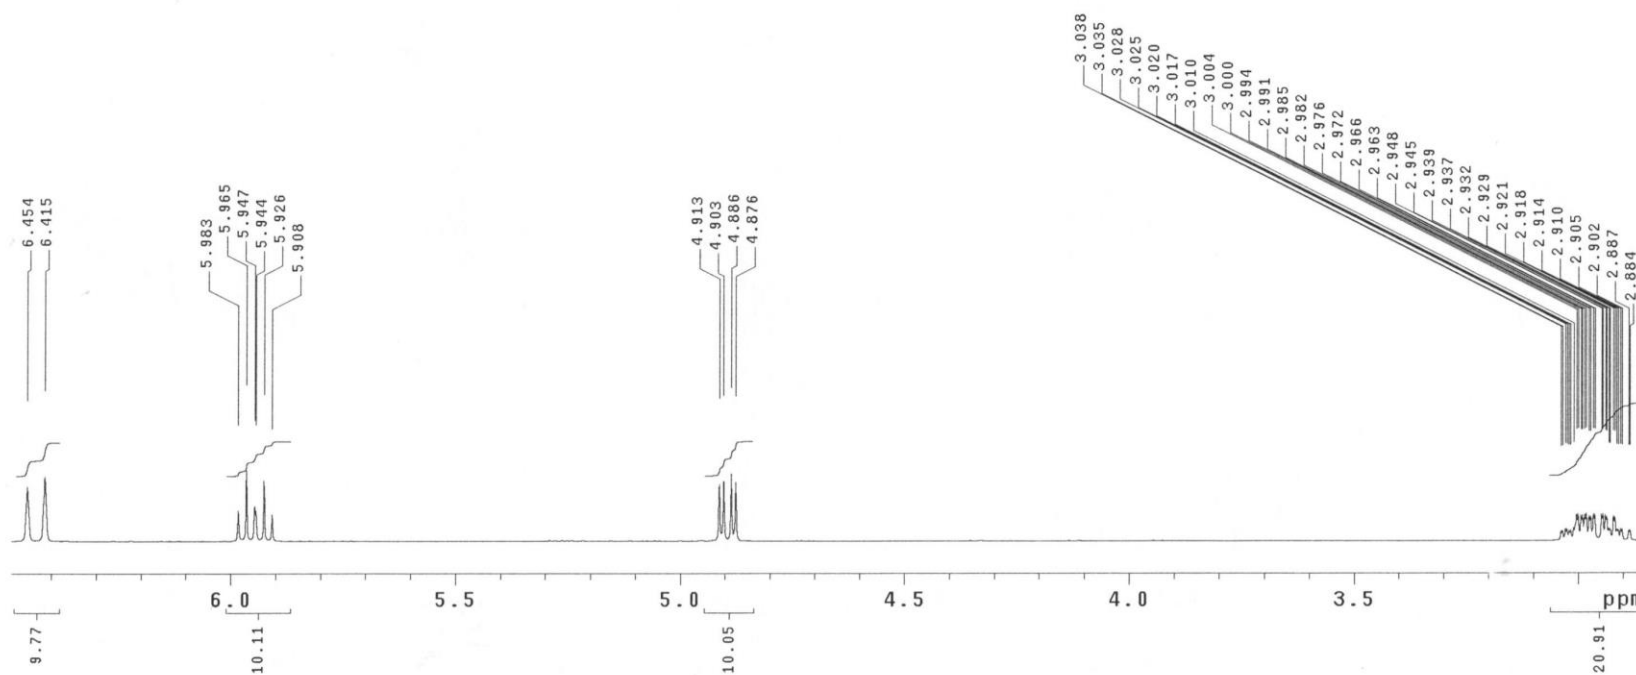

# Compound 4m (<sup>13</sup>C-NMR spectral data)

KSE4C

Pulse Sequence: s2pu1

UNITYplus-400 "unity400"

Date: Sep 4 2018

Solvent: CDCl<sub>3</sub>

Ambient temperature

Total 1952 repetitions

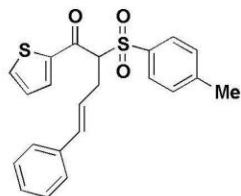

Compound 4m

<sup>13</sup>C NMR (100 MHz, CDCl<sub>3</sub>) spectra

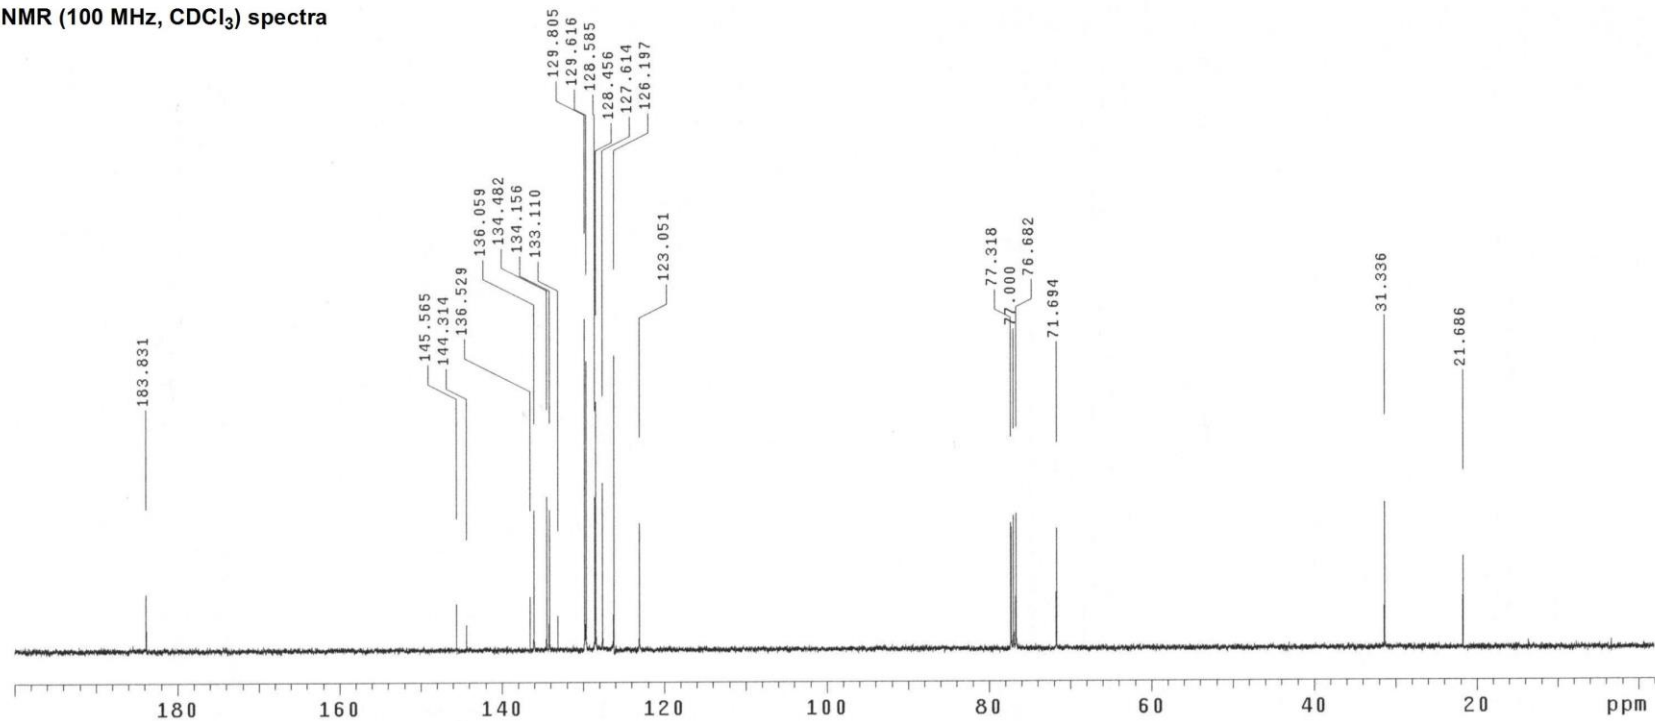

# Compound 4n (<sup>1</sup>H-NMR spectral data-1)

KSE3C

Pulse Sequence: s2pu1

UNITYplus-400 "unity400"

Date: Sep 6 2018

Solvent: CDCl<sub>3</sub>

Ambient temperature

Total 32 repetitions

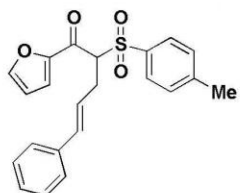

Compound 4n

<sup>1</sup>H NMR (400 MHz, CDCl<sub>3</sub>) spectra

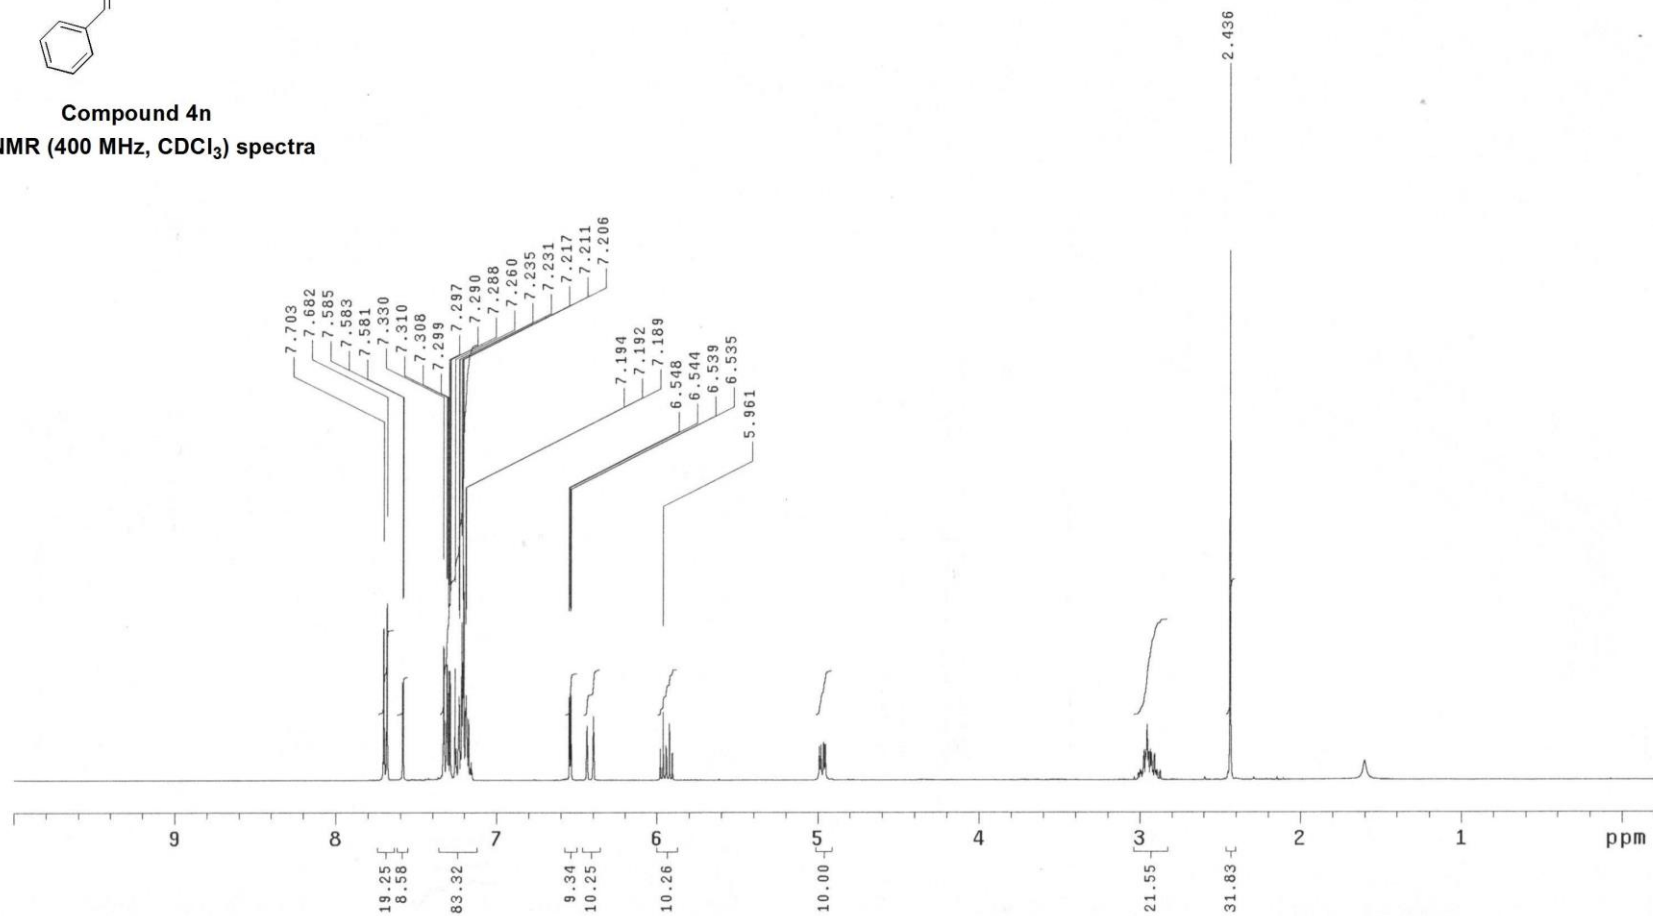

# Compound 4n (<sup>1</sup>H-NMR spectral data-2)

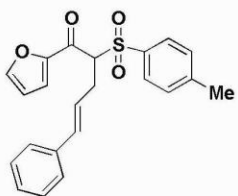

Compound 4n

<sup>1</sup>H NMR (400 MHz, CDCl<sub>3</sub>) spectra

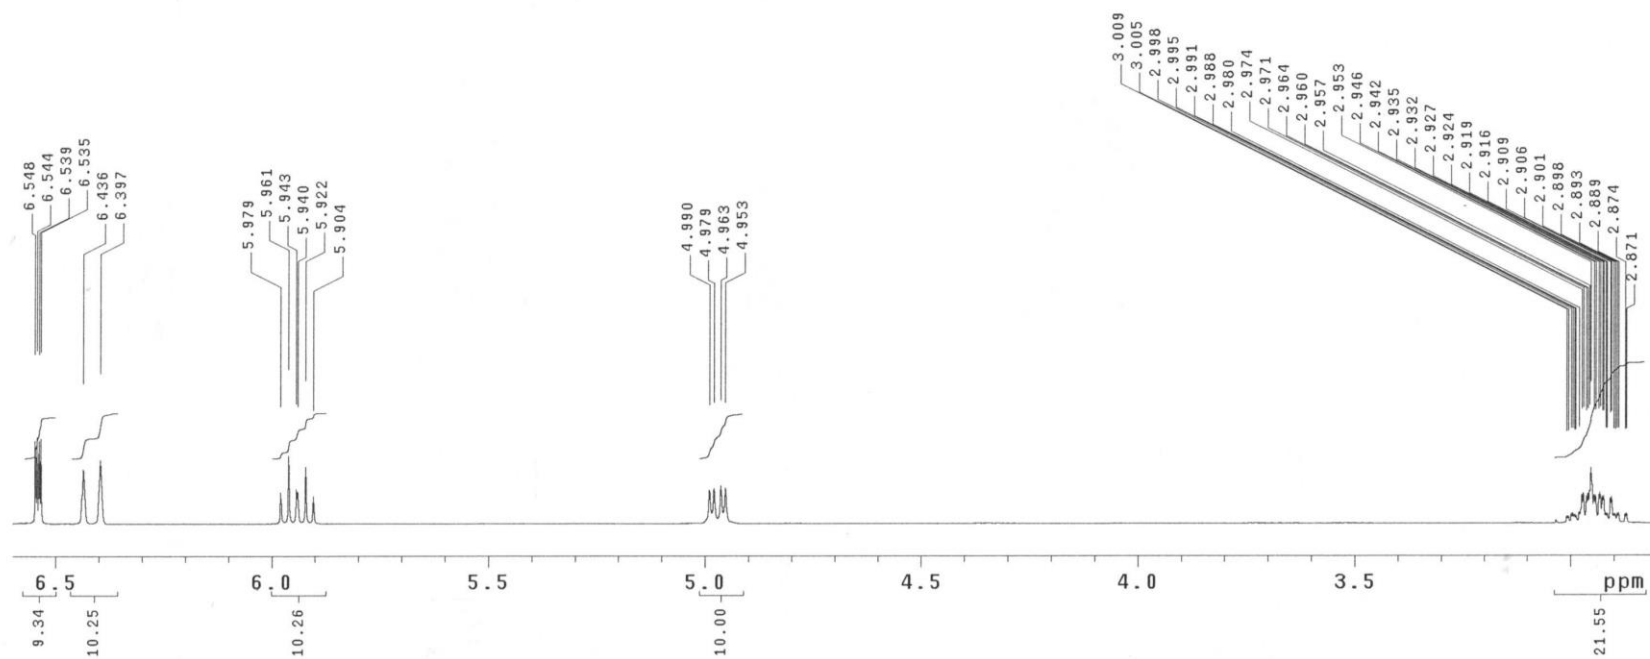

# Compound 4n (<sup>13</sup>C-NMR spectral data)

Pulse Sequence: s2pu1  
UNITYplus-400 "unity400"  
Date: Sep 6 2018  
Solvent: CDCl<sub>3</sub>  
Ambient temperature  
Total 1408 repetitions

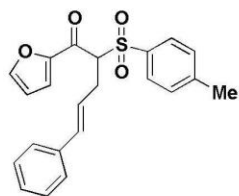

Compound 4n

<sup>13</sup>C NMR (100 MHz, CDCl<sub>3</sub>) spectra

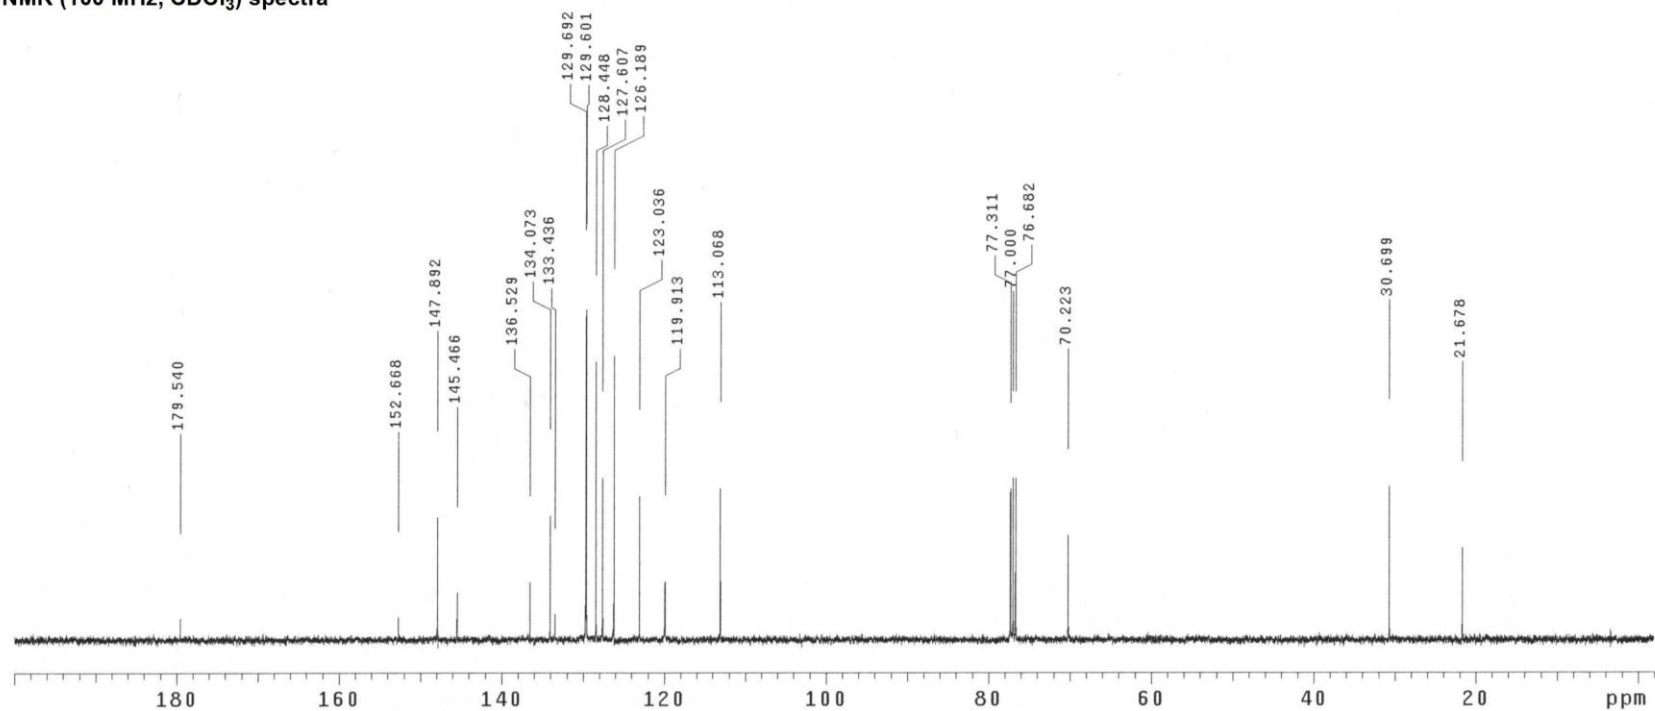

# Compound 4o (<sup>1</sup>H-NMR spectral data-1)

KSTSBr

Pulse Sequence: s2pu1

UNITYplus-400 "unity400"

Date: Feb 21 2019

Solvent: CDCl<sub>3</sub>

Ambient temperature

Total 32 repetitions

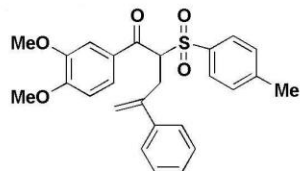

Compound 4o

<sup>1</sup>H NMR (400 MHz, CDCl<sub>3</sub>) spectra

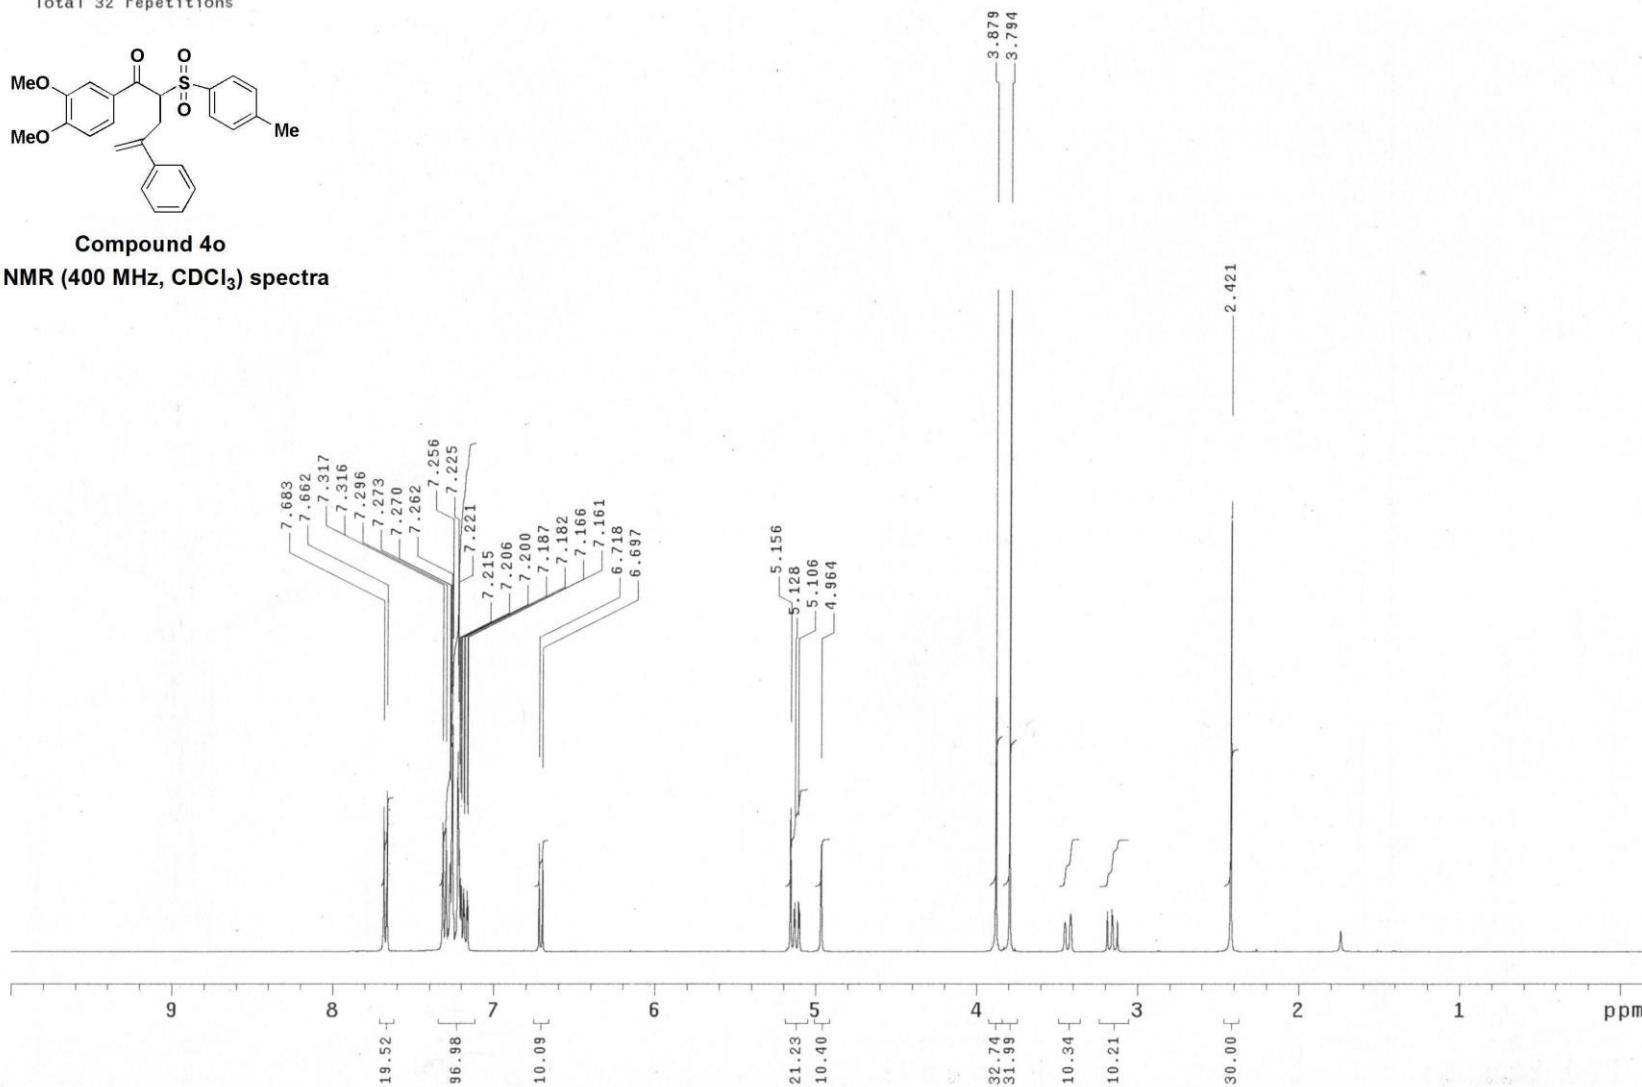

# Compound 4o (<sup>1</sup>H-NMR spectral data-2)

KSTSBr

Pulse Sequence: s2pu1

UNITYplus-400 "unity400"

Date: Feb 21 2019

Solvent: CDCl<sub>3</sub>

Ambient temperature

Total 32 repetitions

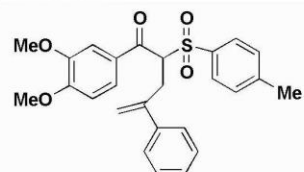

Compound 4o

<sup>1</sup>H NMR (400 MHz, CDCl<sub>3</sub>) spectra

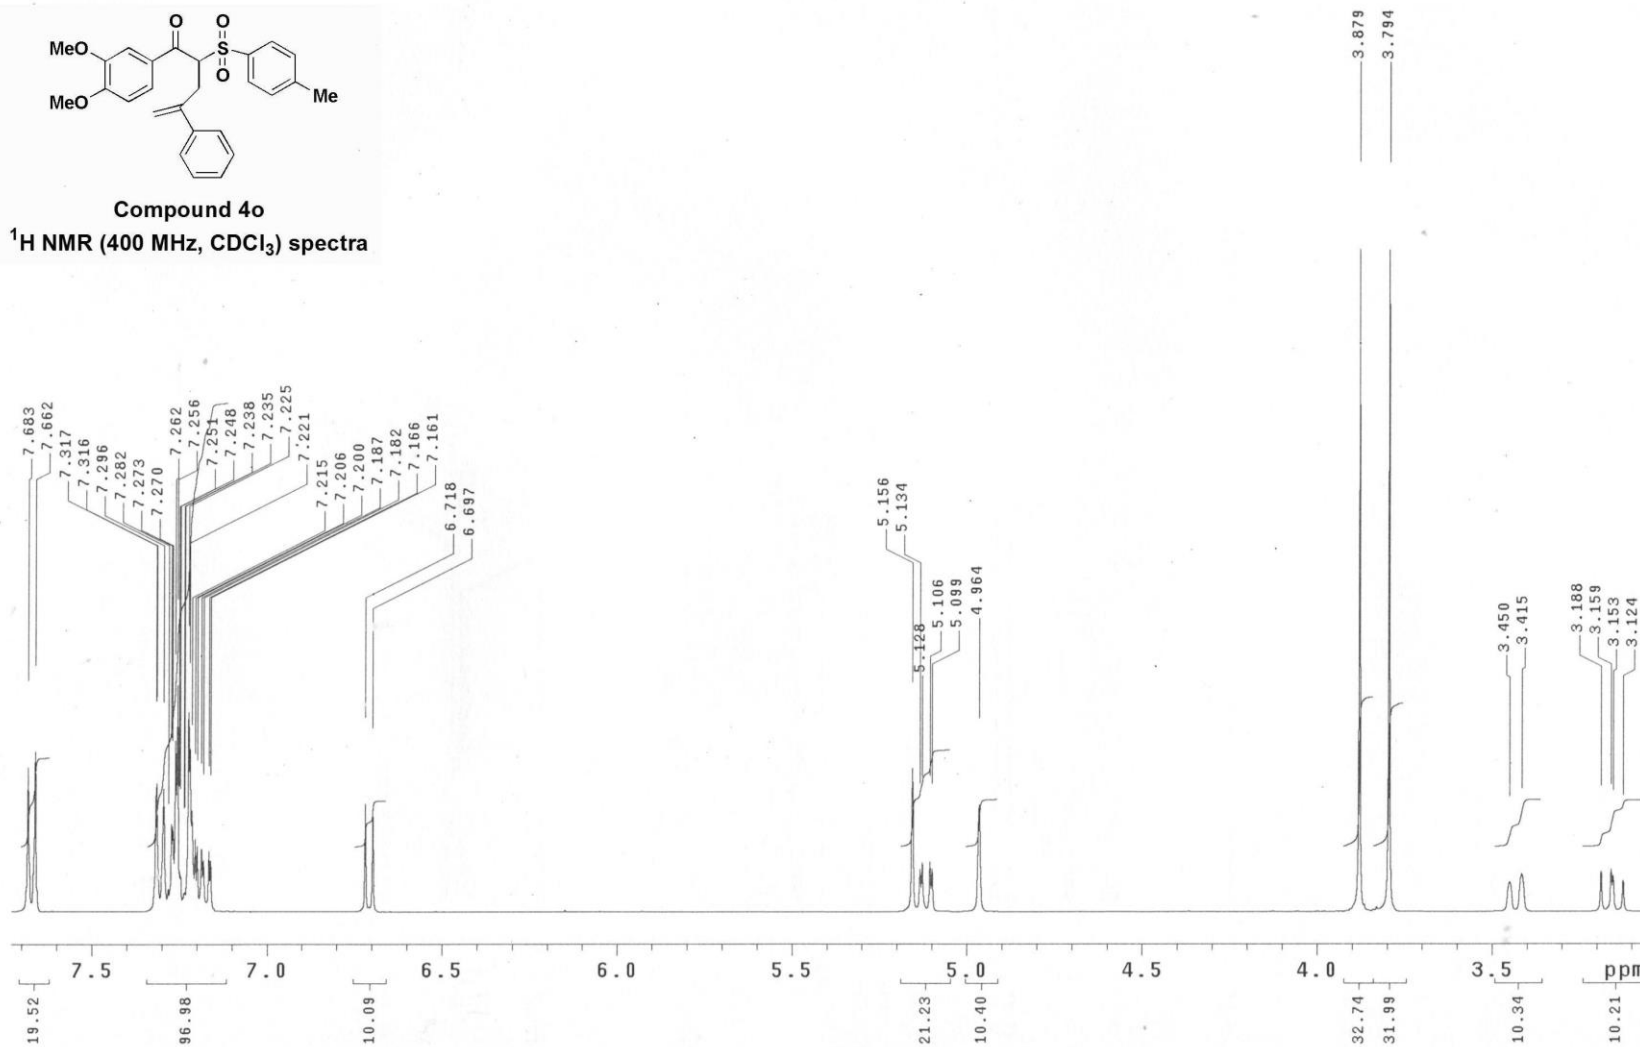

# Compound 4o (<sup>13</sup>C-NMR spectral data)

KSTSBr

Pulse Sequence: s2pu1

UNITYplus-400 "unity400"

Date: Feb 21 2019

Solvent: CDCl<sub>3</sub>

Ambient temperature

Total 560 repetitions

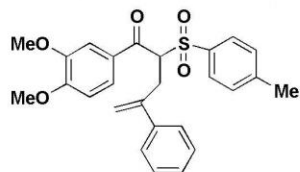

Compound 4o

<sup>13</sup>C NMR (100 MHz, CDCl<sub>3</sub>) spectra

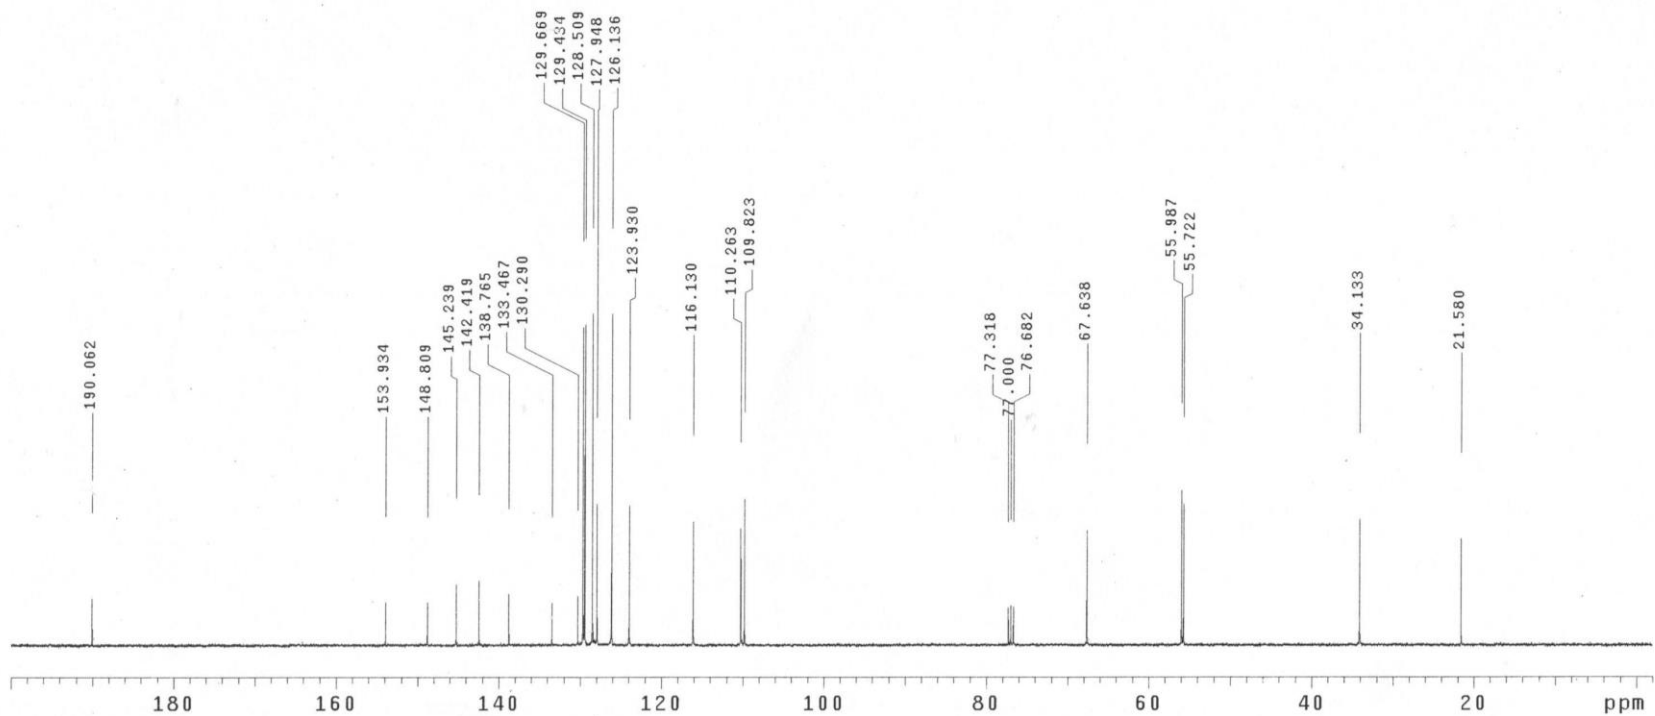

# Compound 4p (<sup>1</sup>H-NMR spectral data-1)

KSBSD

Pulse Sequence: s2pu1

UNITYplus-400 "unity400"

Date: Mar 8 2019

Solvent: CDCl<sub>3</sub>

Ambient temperature

Total 32 repetitions

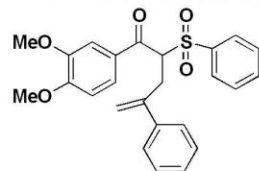

Compound 4p

<sup>1</sup>H NMR (400 MHz, CDCl<sub>3</sub>) spectra

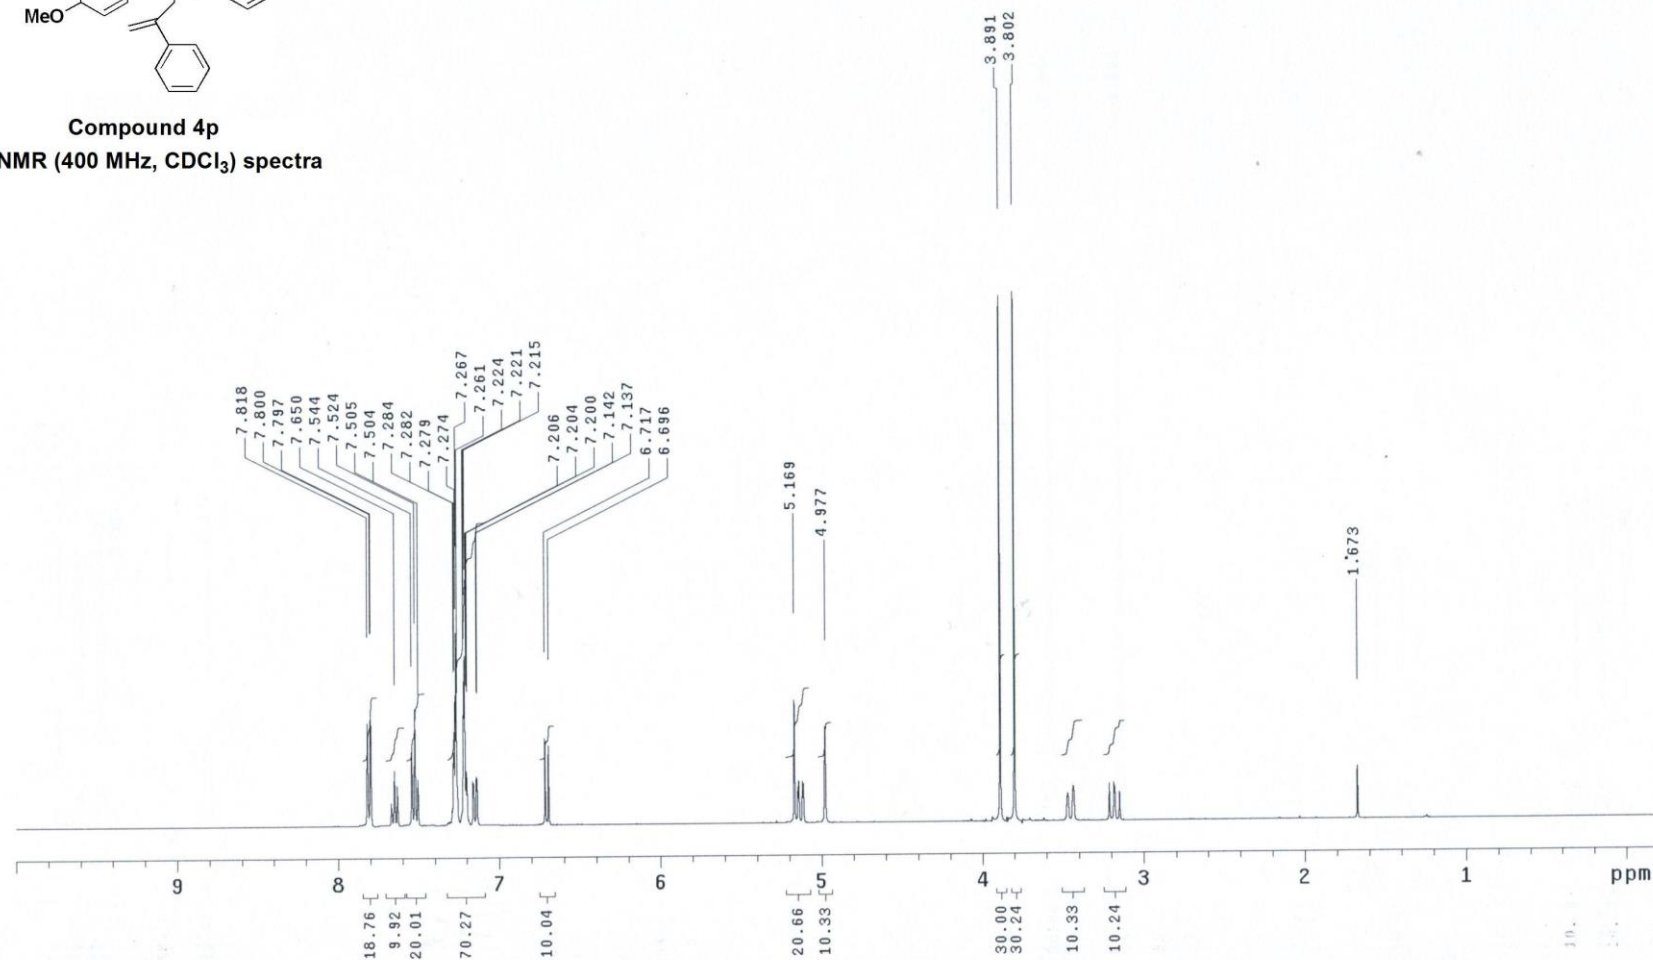

# Compound 4p (<sup>1</sup>H-NMR spectral data-2)

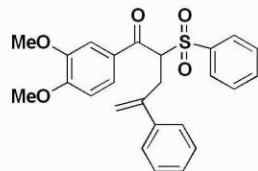

Compound 4p  
<sup>1</sup>H NMR (400 MHz, CDCl<sub>3</sub>) spectra

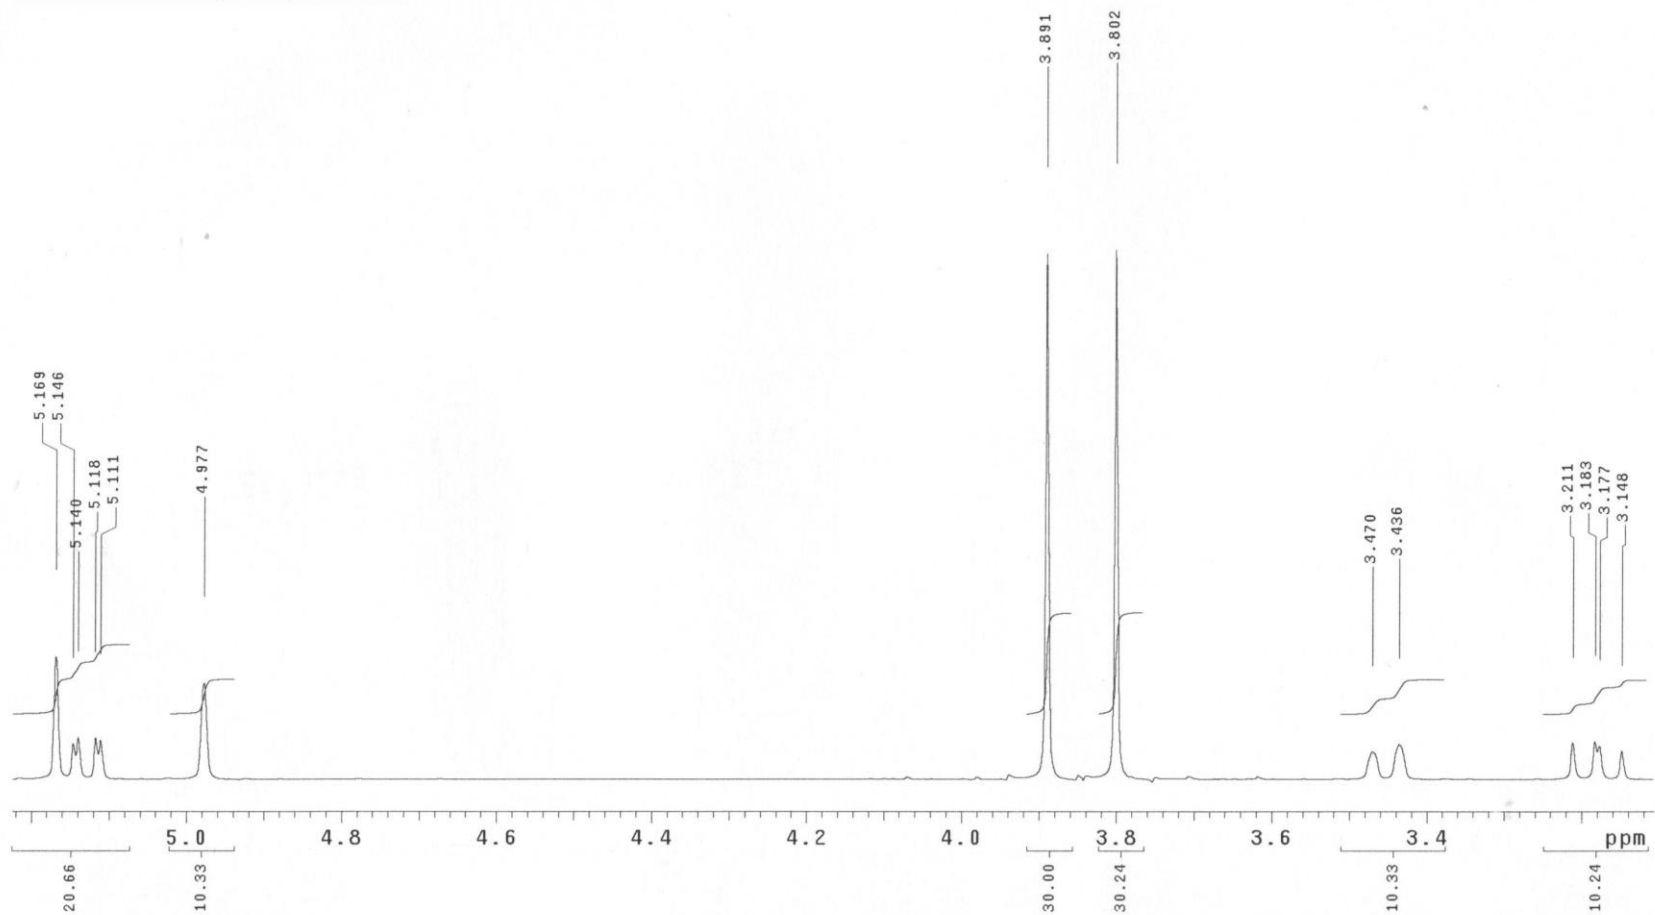

# Compound 4p (<sup>13</sup>C-NMR spectral data)

KSBSD

Pulse Sequence: s2pu1

UNITYplus-400 "unity400"

Date: Mar 8 2019

Solvent: CDCl<sub>3</sub>

Ambient temperature

Total 800 repetitions

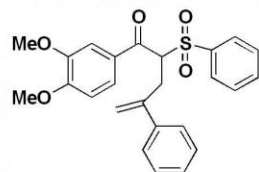

Compound 4p

<sup>13</sup>C NMR (100 MHz, CDCl<sub>3</sub>) spectra

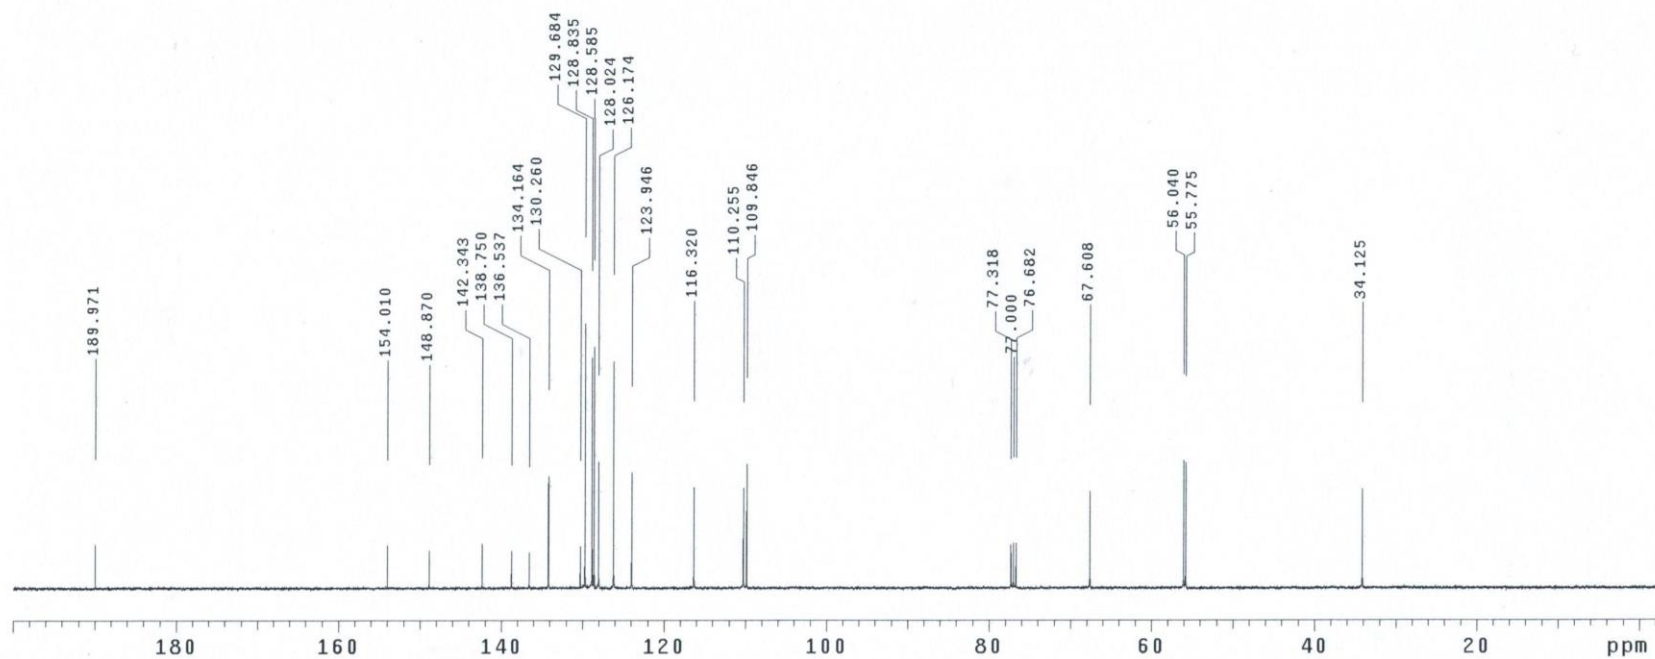

# Compound 4q (<sup>1</sup>H-NMR spectral data-1)

KSMSD

Pulse Sequence: s2pu1

UNITYplus-400 "unity400"

Date: Mar 18 2019

Solvent: CDCl<sub>3</sub>

Ambient temperature

Total 32 repetitions

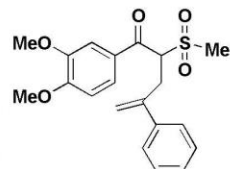

Compound 4q

<sup>1</sup>H NMR (400 MHz, CDCl<sub>3</sub>) spectra

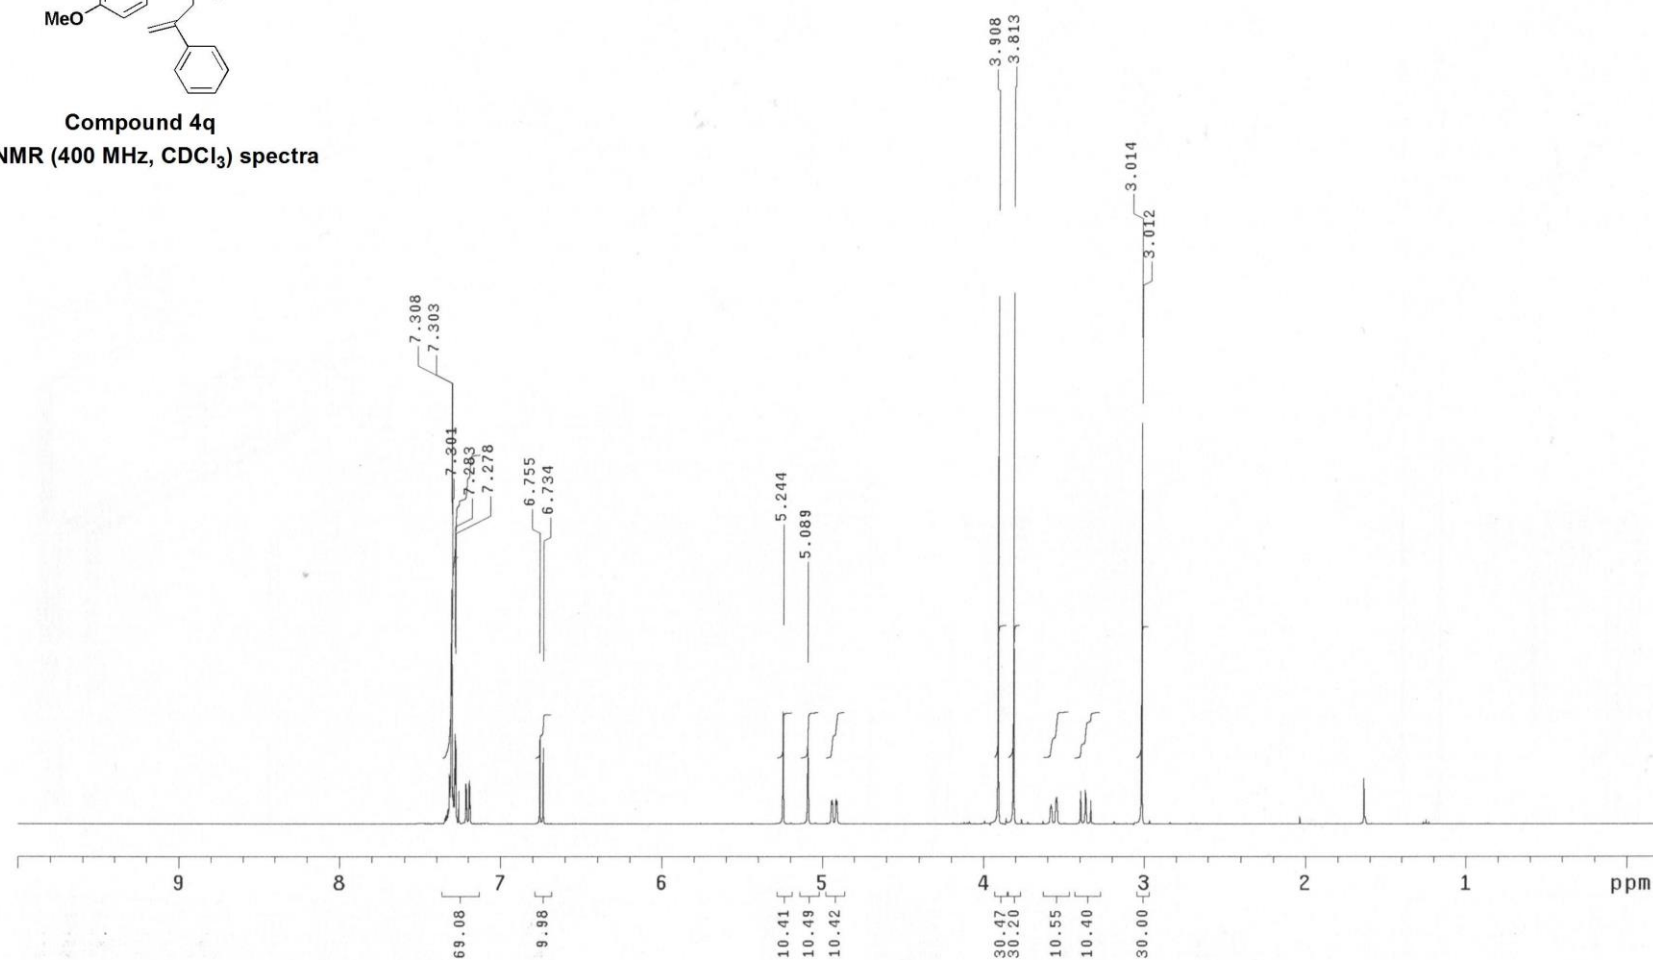

# Compound 4q (<sup>1</sup>H-NMR spectral data-2)

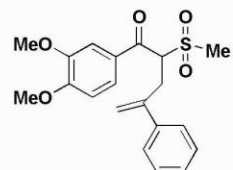

Compound 4q

<sup>1</sup>H NMR (400 MHz, CDCl<sub>3</sub>) spectra

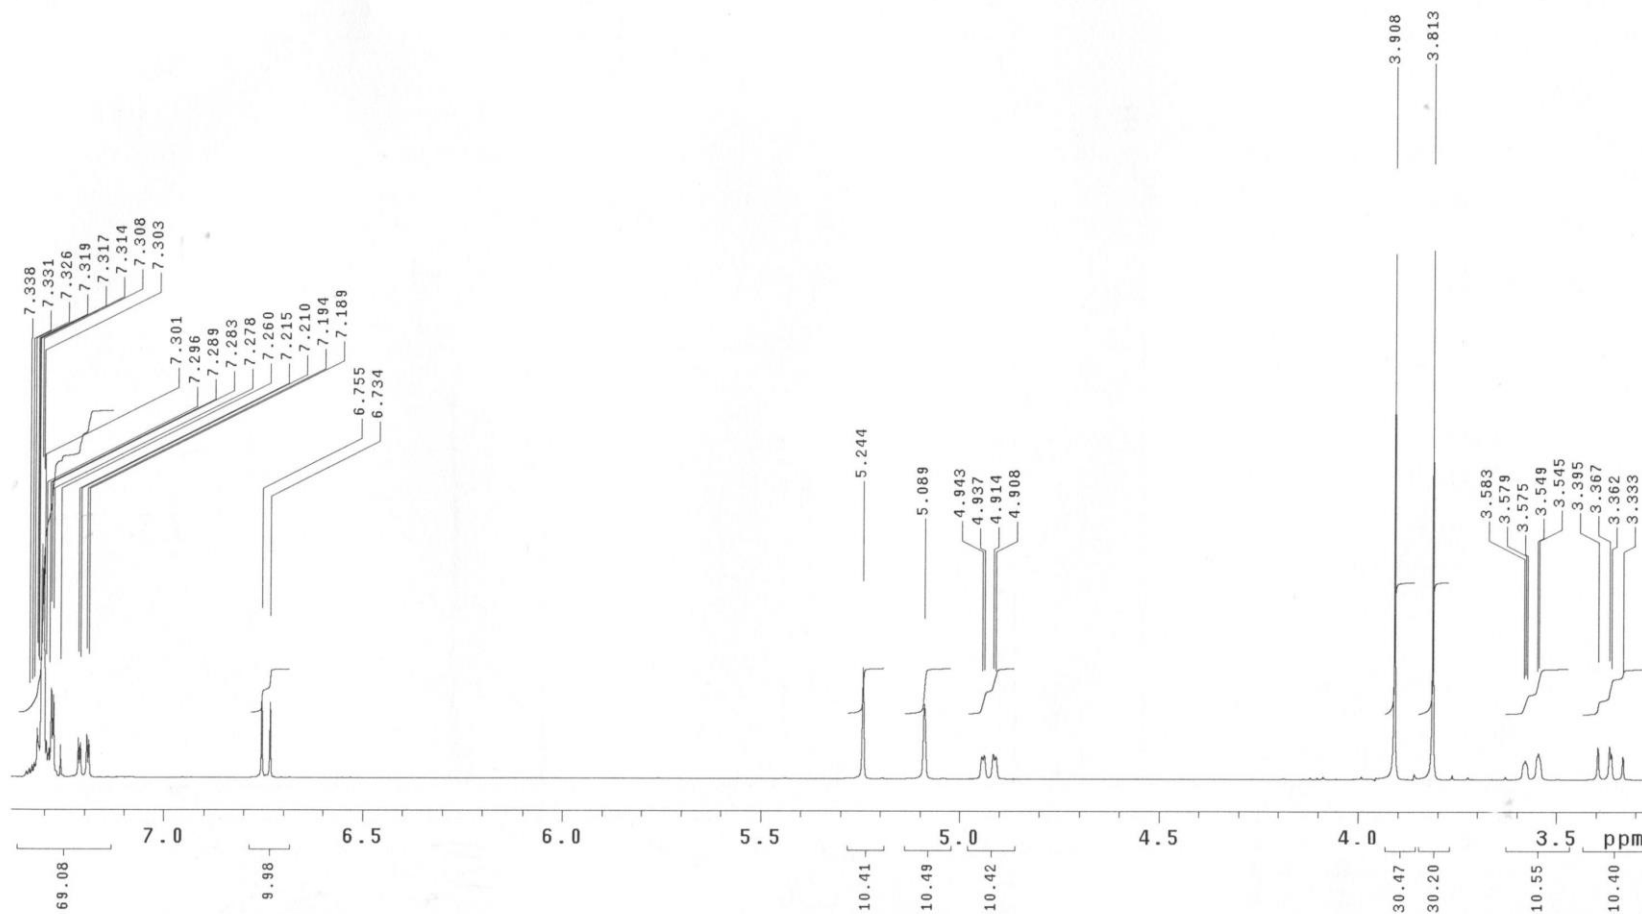

# Compound 4q ( $^{13}\text{C}$ -NMR spectral data)

Pulse Sequence: s2pu1  
UNITYplus-400 "unity400"  
Date: Mar 18 2019  
Solvent:  $\text{CDCl}_3$   
Ambient temperature  
Total 672 repetitions

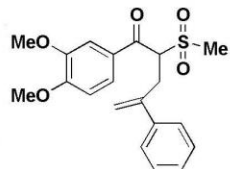

Compound 4q

$^{13}\text{C}$  NMR (100 MHz,  $\text{CDCl}_3$ ) spectra

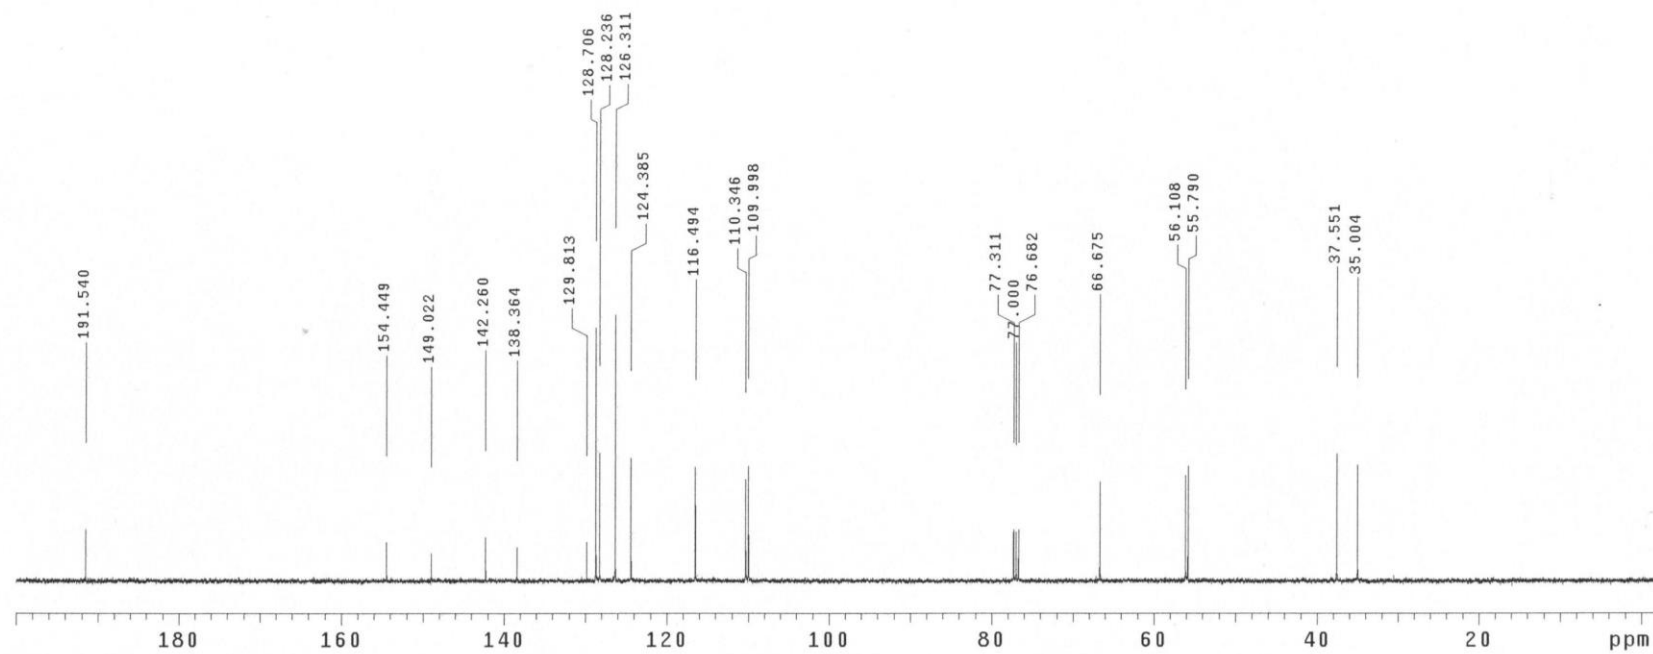

# Compound 4r (<sup>1</sup>H-NMR spectral data-1)

KSmMeD

Pulse Sequence: s2pu1

UNITYplus-400 "unity400"

Date: Mar 12 2019

Solvent: CDCl<sub>3</sub>

Ambient temperature

Total 32 repetitions

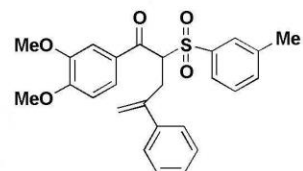

Compound 4r

<sup>1</sup>H NMR (400 MHz, CDCl<sub>3</sub>) spectra

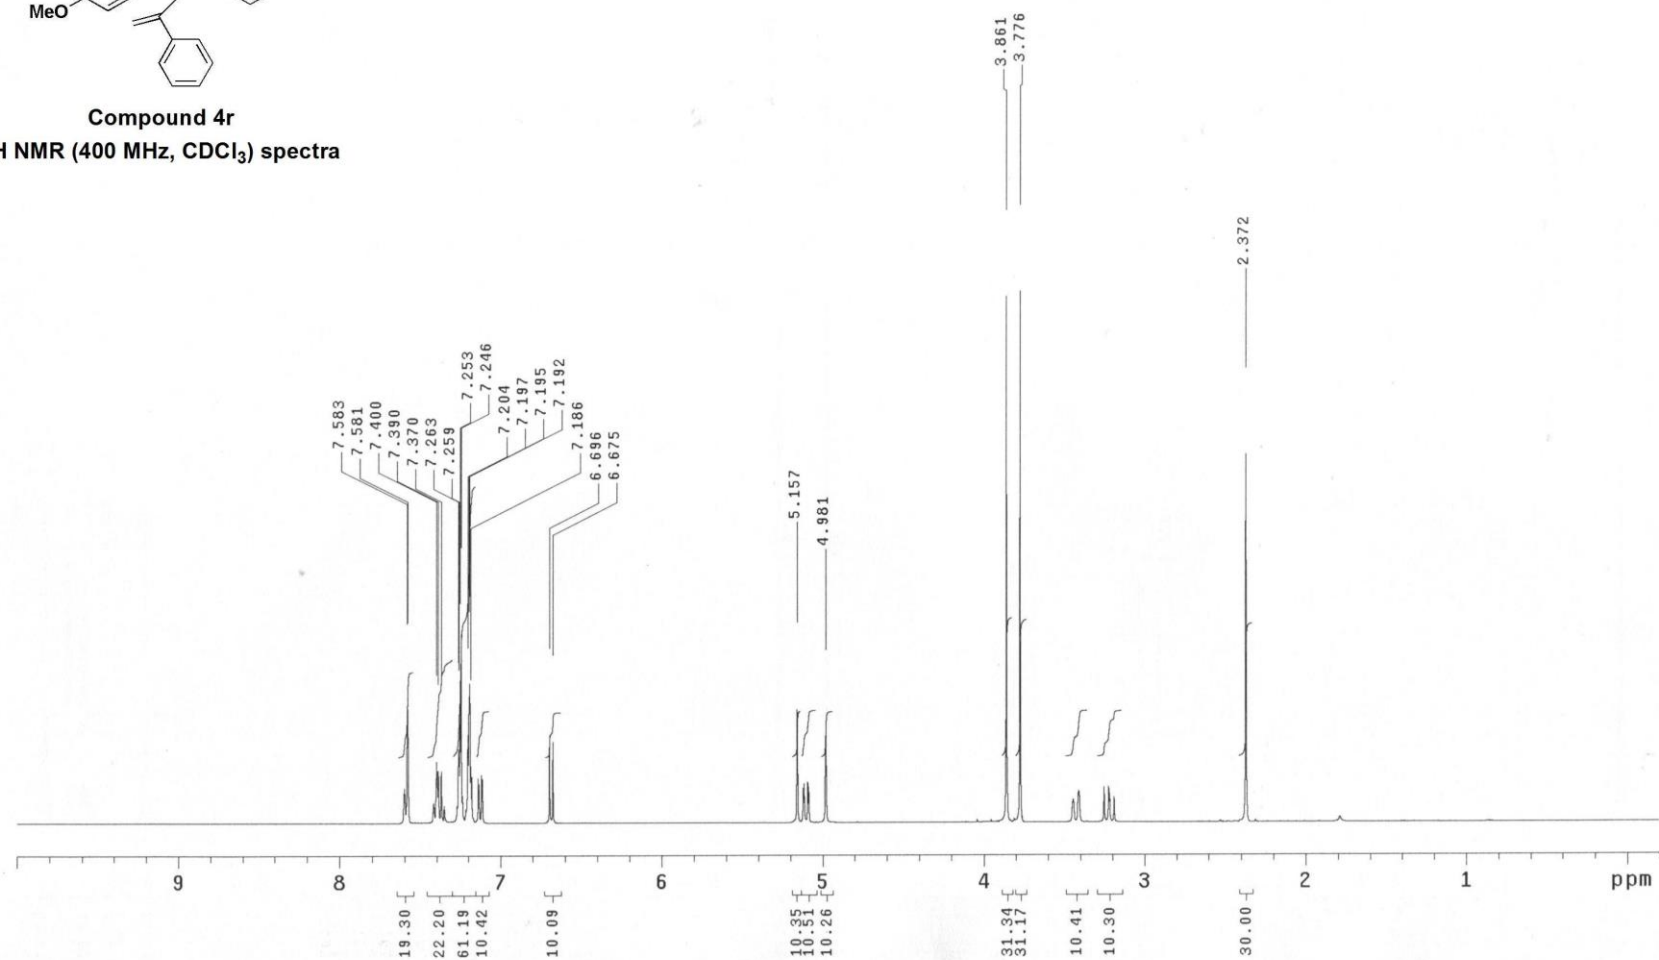

# Compound 4r (<sup>1</sup>H-NMR spectral data-2)

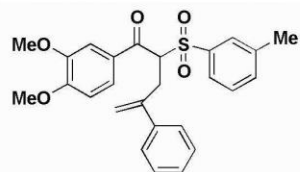

Compound 4r

<sup>1</sup>H NMR (400 MHz, CDCl<sub>3</sub>) spectra

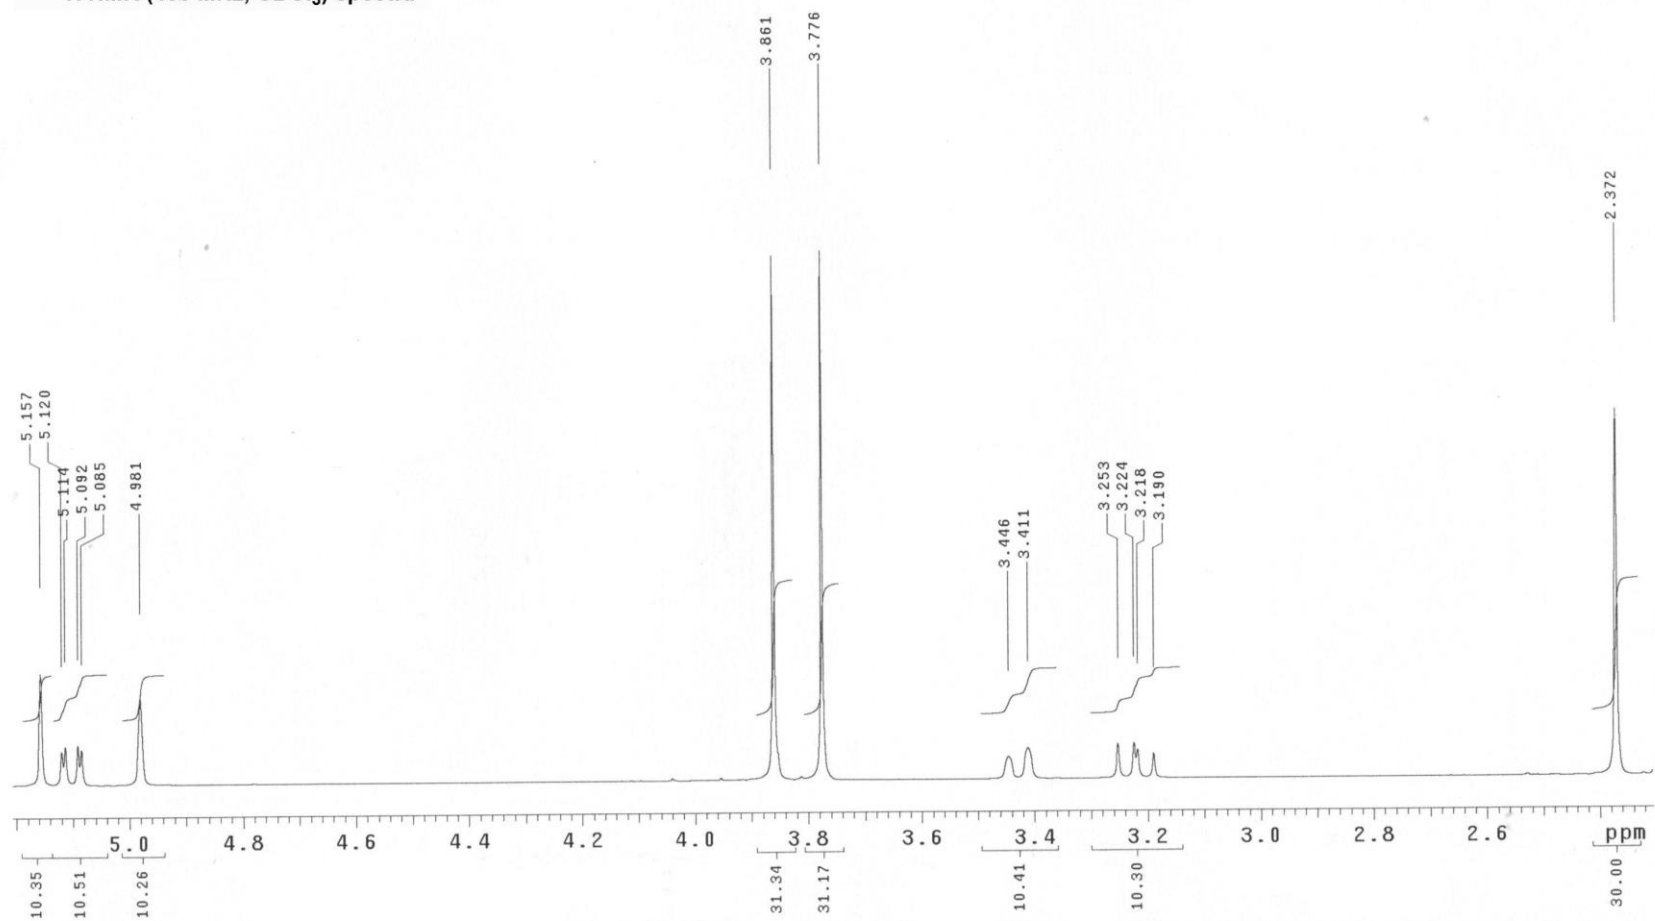

# Compound 4r (<sup>13</sup>C-NMR spectral data)

KSmMeD

Pulse Sequence: s2pu1

UNITYplus-400 "unity400"

Date: Mar 12 2019

Solvent: CDCl<sub>3</sub>

Ambient temperature

Total 1024 repetitions

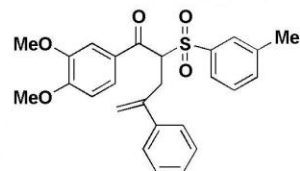

Compound 4r

<sup>13</sup>C NMR (100 MHz, CDCl<sub>3</sub>) spectra

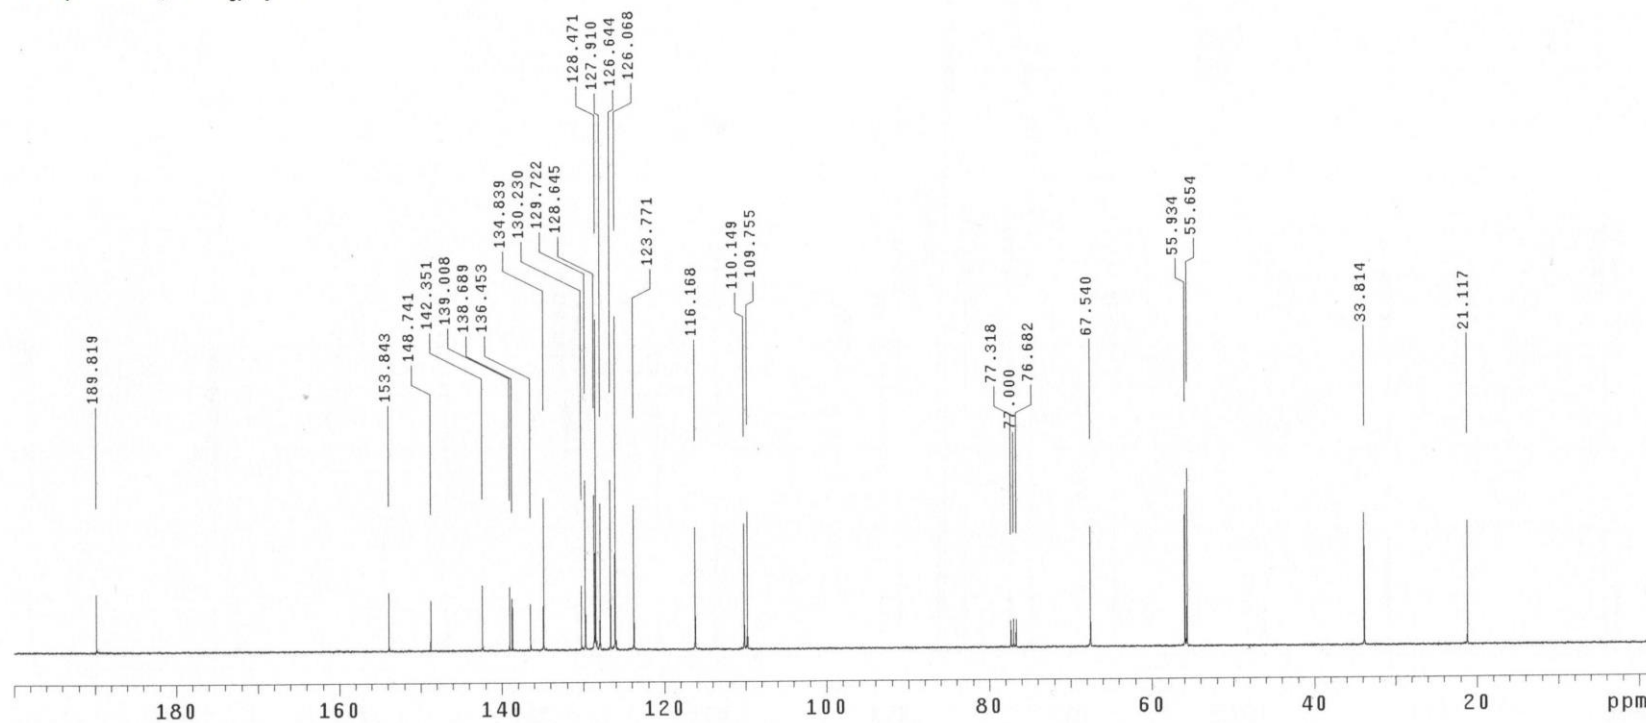

# Compound 4s (<sup>1</sup>H-NMR spectral data-1)

KS30MeD

Pulse Sequence: s2pu1

UNITYplus-400 "unity400"

Date: Mar 7 2019

Solvent: CDCl<sub>3</sub>

Ambient temperature

Total 32 repetitions

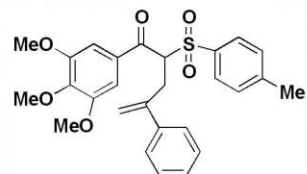

Compound 4s

<sup>1</sup>H NMR (400 MHz, CDCl<sub>3</sub>) spectra

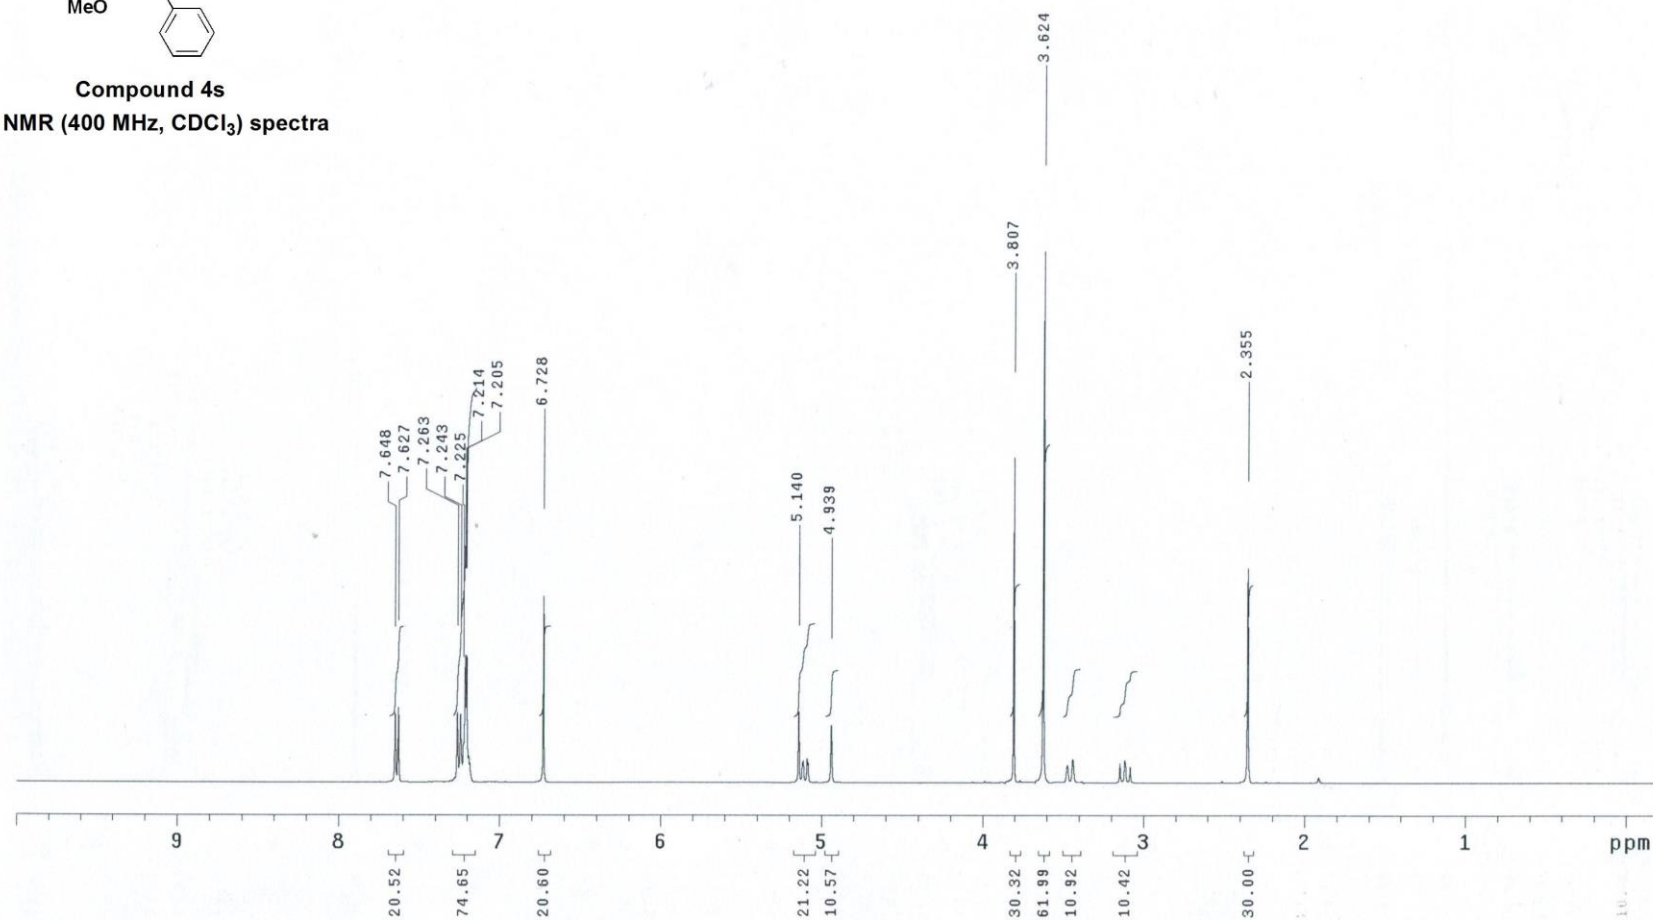

# Compound 4s (<sup>1</sup>H-NMR spectral data-2)

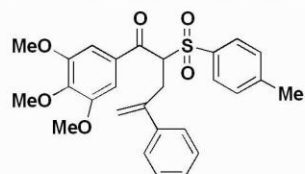

Compound 4s

<sup>1</sup>H NMR (400 MHz, CDCl<sub>3</sub>) spectra

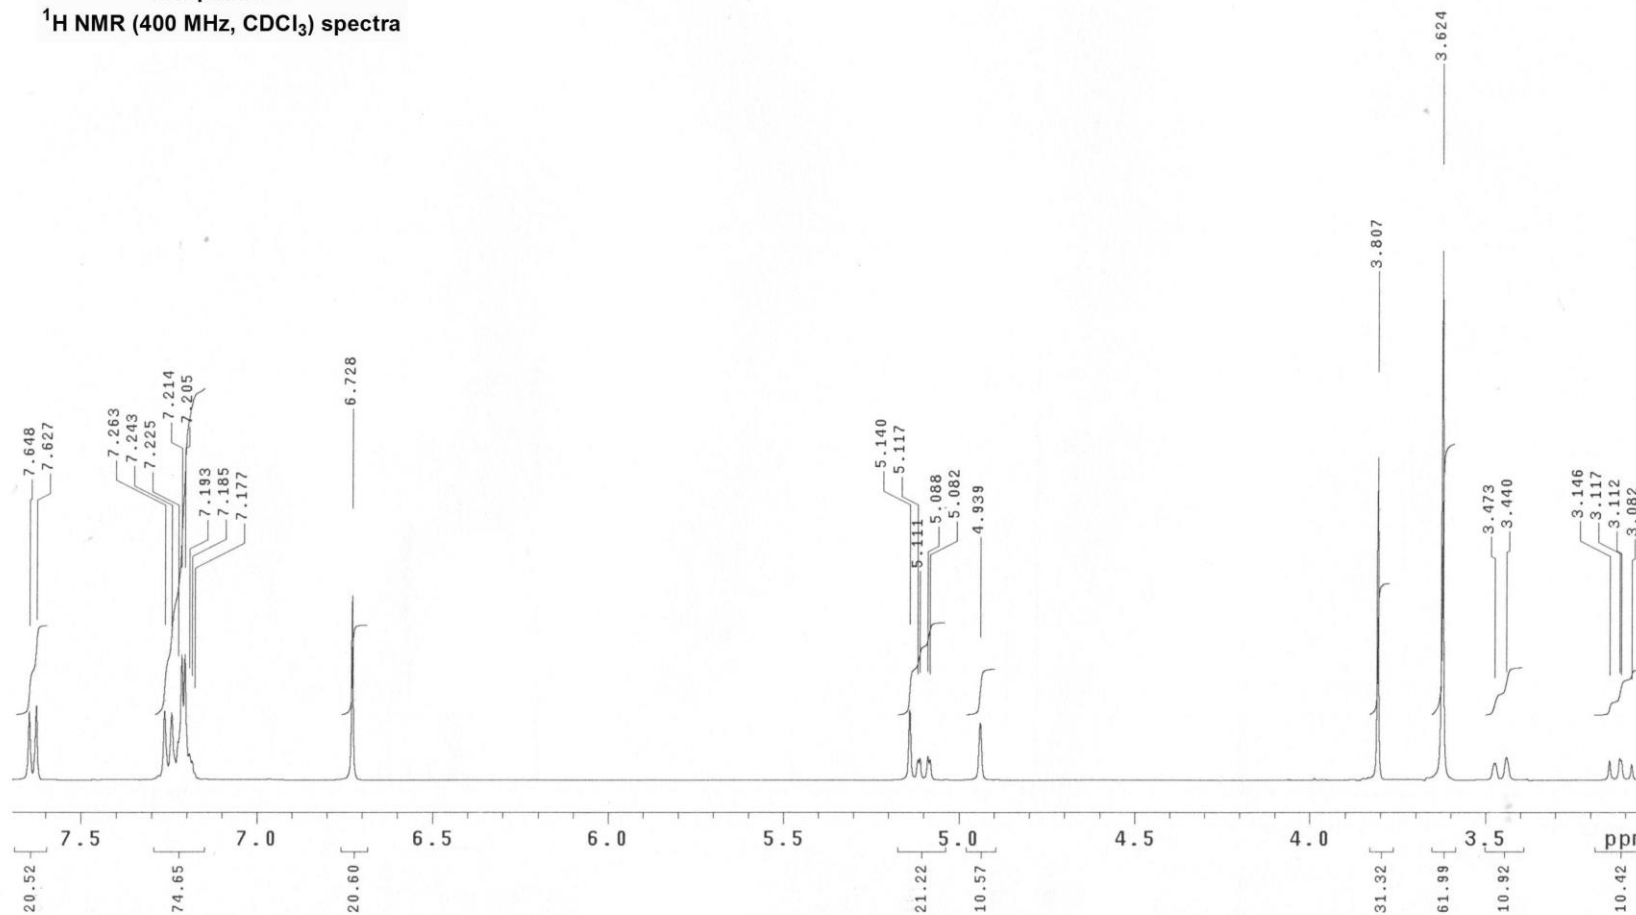

# Compound 4s (<sup>13</sup>C-NMR spectral data)

KS30MeD

Pulse Sequence: s2pu1

UNITYplus-400 "unity400"

Date: Mar 7 2019

Solvent: CDCl<sub>3</sub>

Ambient temperature

Total 160 repetitions

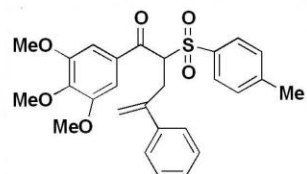

Compound 4s

<sup>13</sup>C NMR (100 MHz, CDCl<sub>3</sub>) spectra

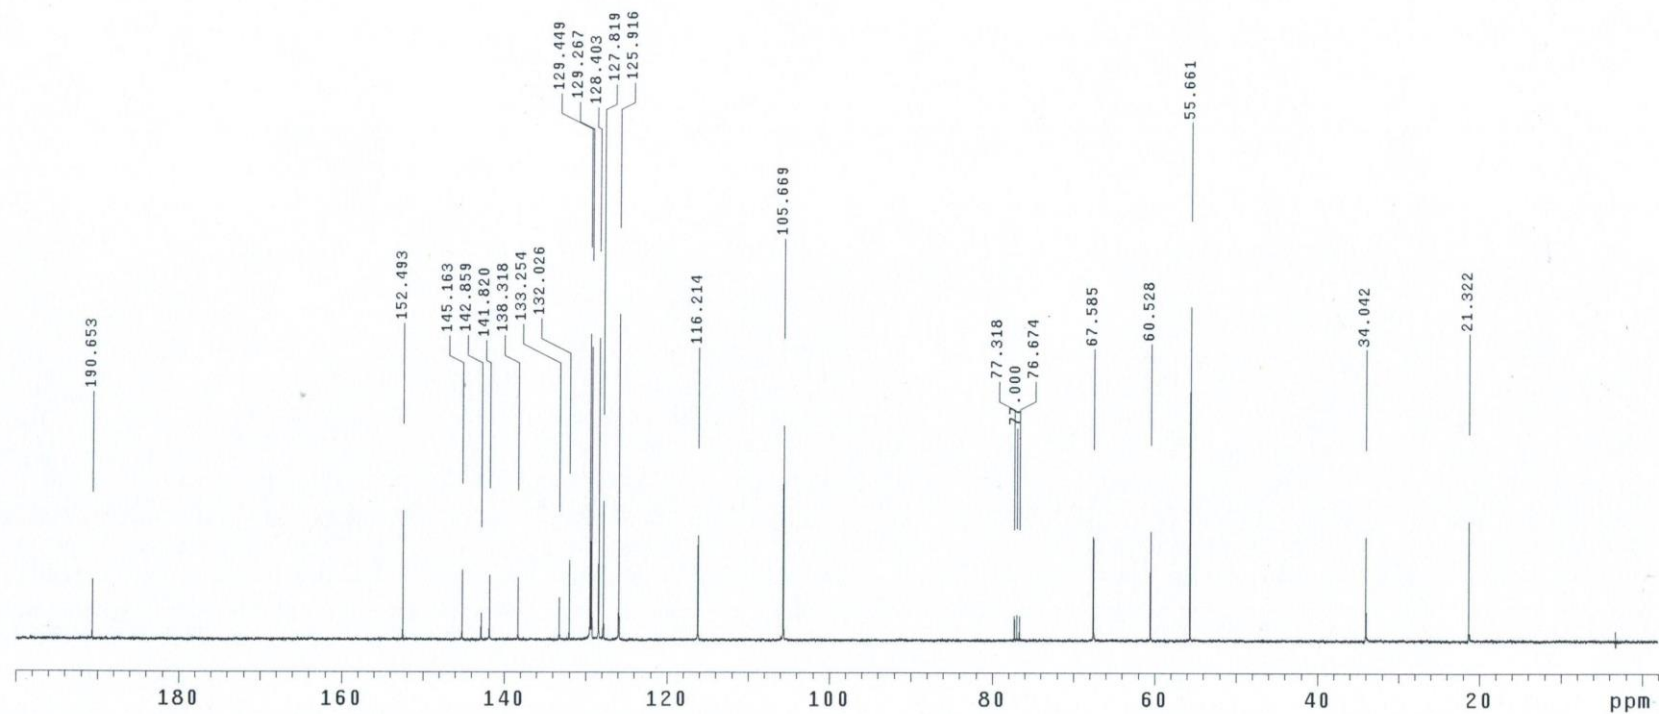

# Compound 4t (<sup>1</sup>H-NMR spectral data-1)

KSE7Cr

Pulse Sequence: s2pu1

UNITYplus-400 "unity400"

Date: Nov 26 2018

Solvent: CDCl<sub>3</sub>

Ambient temperature

Total 32 repetitions

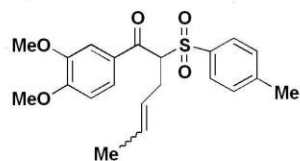

Compound 4t

<sup>1</sup>H NMR (400 MHz, CDCl<sub>3</sub>) spectra

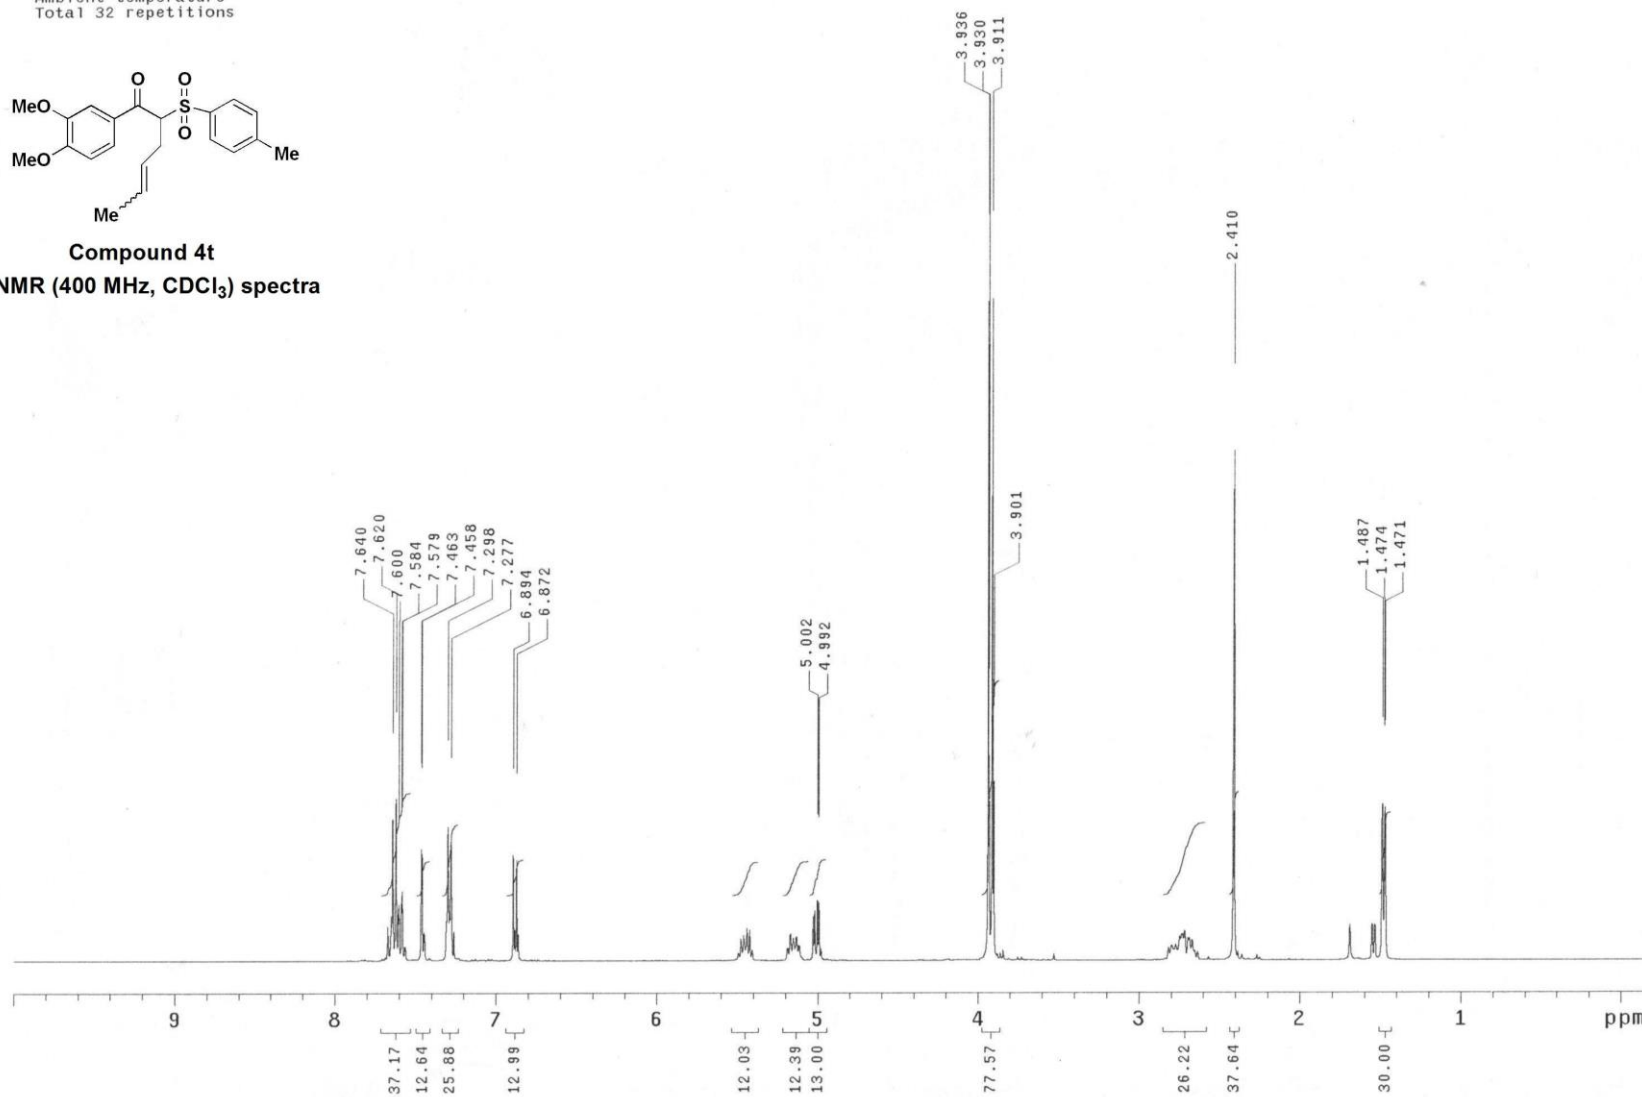

# Compound 4t (<sup>1</sup>H-NMR spectral data-2)

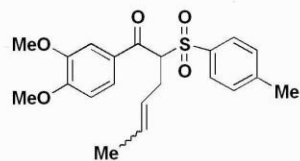

Compound 4t  
<sup>1</sup>H NMR (400 MHz, CDCl<sub>3</sub>) spectra

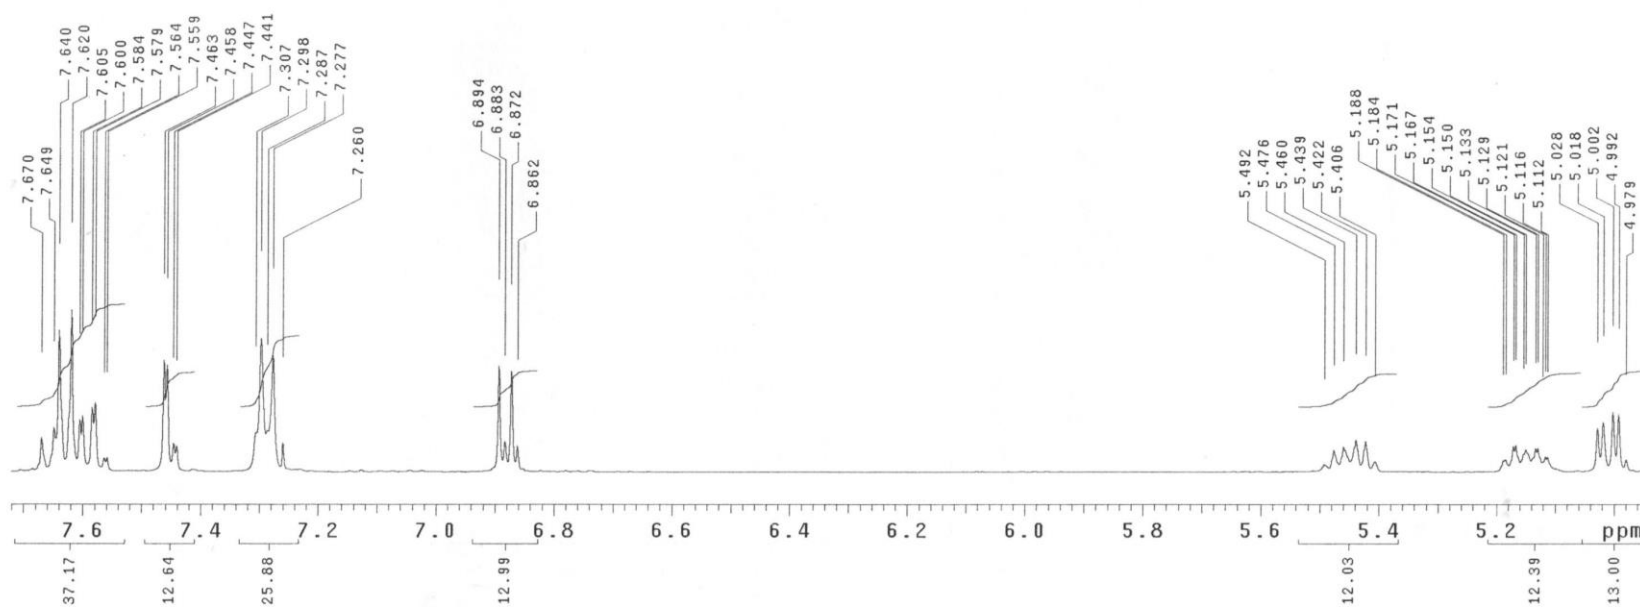

# Compound 4t (<sup>13</sup>C-NMR spectral data)

KSE7Cr

Pulse Sequence: s2pu1

UNITYplus-400 "unity400"

Date: Nov 26 2018

Solvent: CDCl<sub>3</sub>

Ambient temperature

Total 848 repetitions

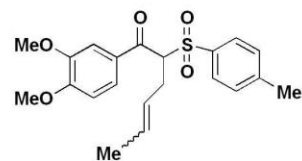

Compound 4t

<sup>13</sup>C NMR (100 MHz, CDCl<sub>3</sub>) spectra

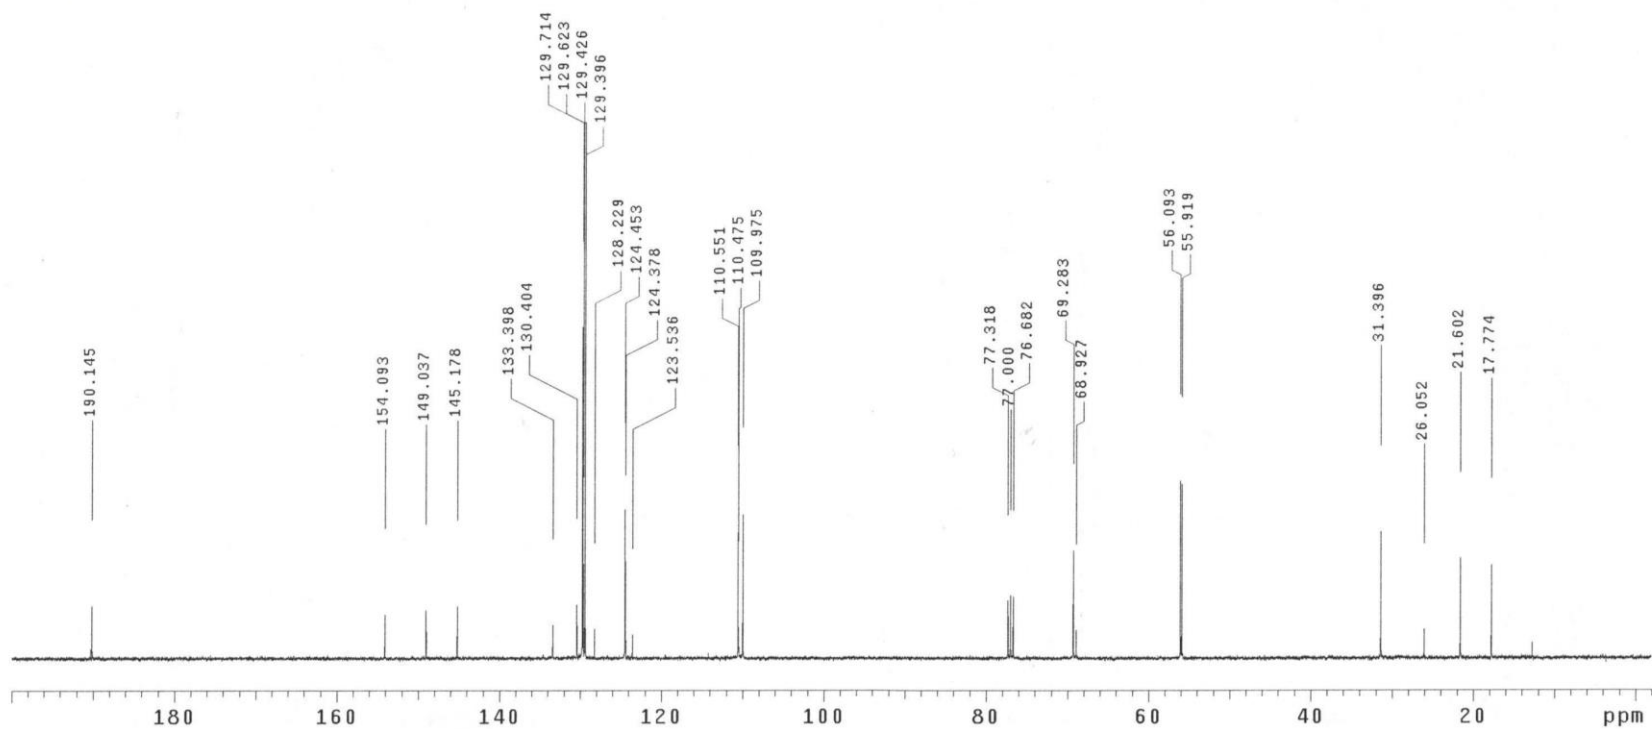

# Compound 4u (<sup>1</sup>H-NMR spectral data-1)

KSFCr

Pulse Sequence: s2pu1  
 UNITYplus-400 "unity400"  
 Date: Dec 24 2018  
 Solvent: CDCl<sub>3</sub>  
 Ambient temperature  
 Total 32 repetitions

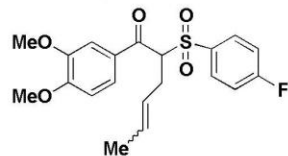

Compound 4u

<sup>1</sup>H NMR (400 MHz, CDCl<sub>3</sub>) spectra

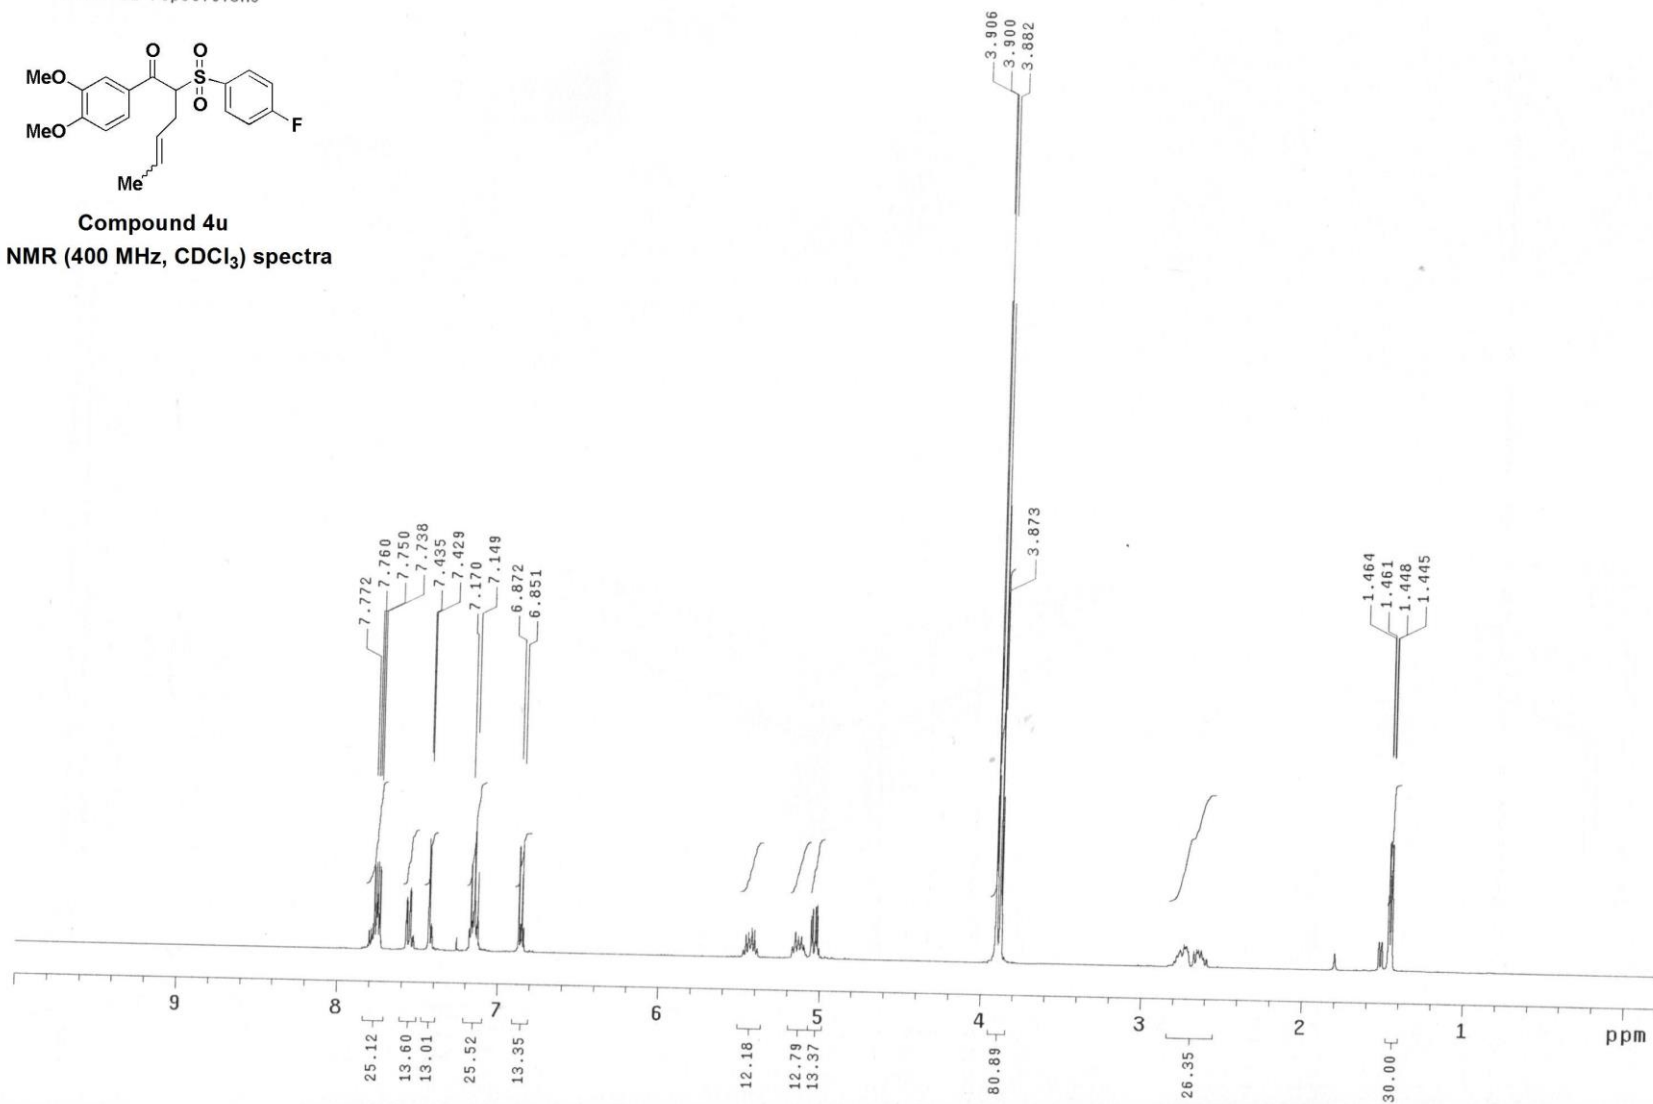

# Compound 4u (<sup>1</sup>H-NMR spectral data-2)

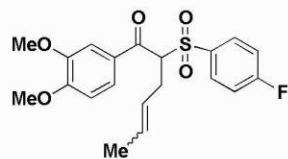

Compound 4u

<sup>1</sup>H NMR (400 MHz, CDCl<sub>3</sub>) spectra

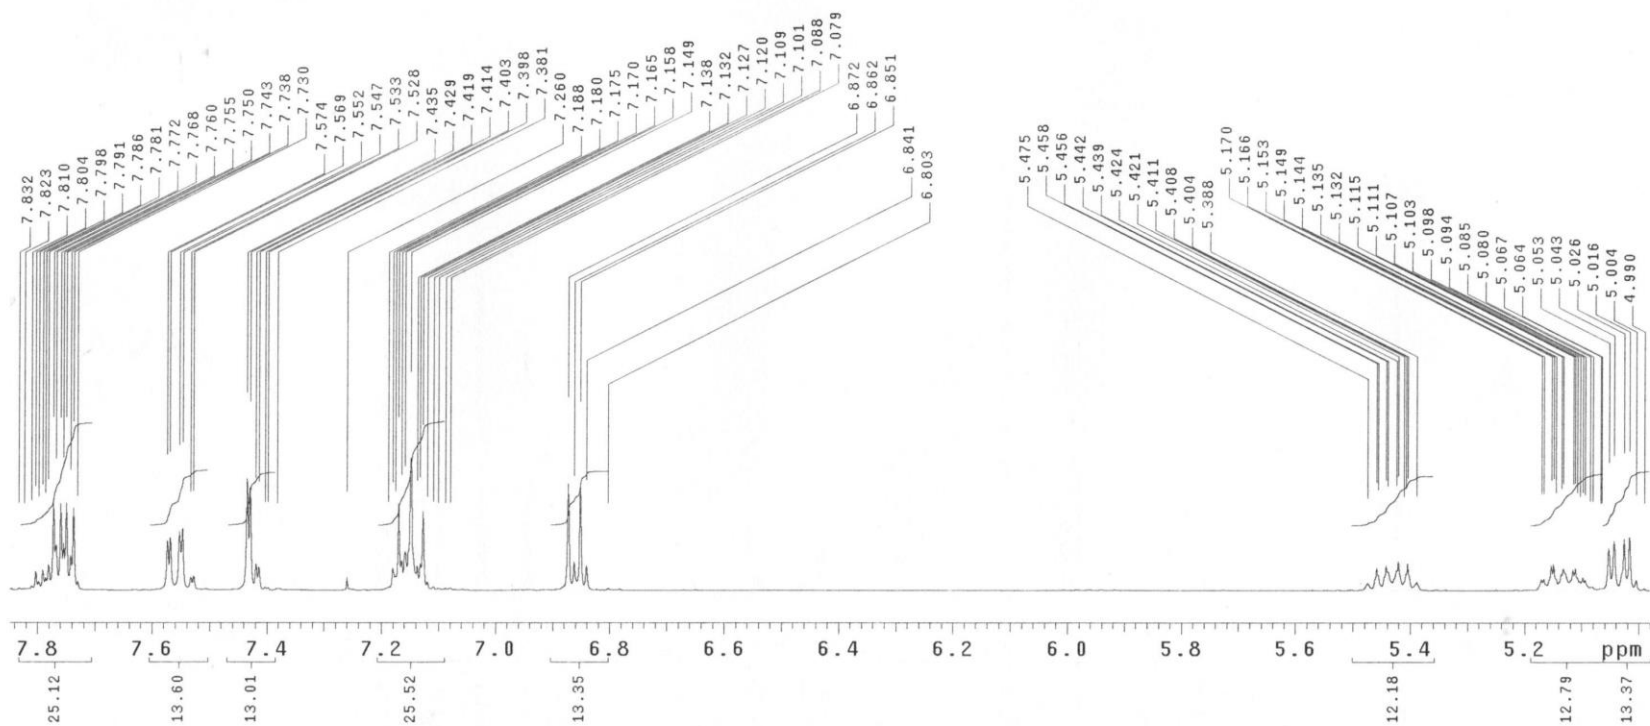

# Compound 4u (<sup>13</sup>C-NMR spectral data)

KSFCr

Pulse Sequence: s2pu1

UNITYplus-400 "unity400"

Date: Dec 24 2018

Solvent: CDCl<sub>3</sub>

Ambient temperature

Total 800 repetitions

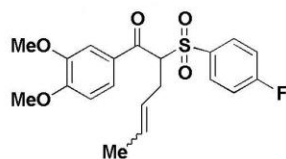

Compound 4u

<sup>13</sup>C NMR (100 MHz, CDCl<sub>3</sub>) spectra

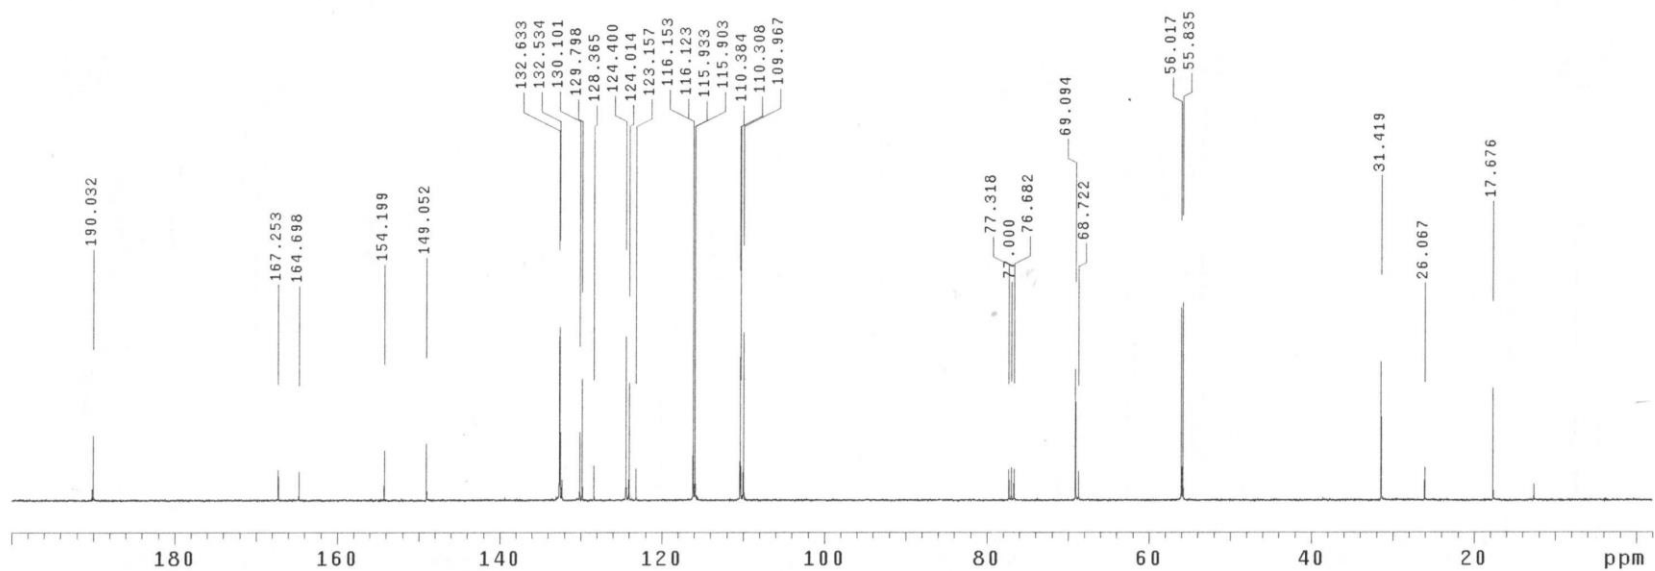

# Compound 4v (<sup>1</sup>H-NMR spectral data-1)

KSOMeCr

Pulse Sequence: s2pu1

UNITYplus-400 "unity400"

Date: Jan 3 2019

Solvent: CDCl<sub>3</sub>

Ambient temperature

Total 32 repetitions

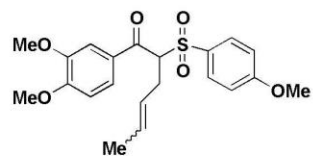

Compound 4v

<sup>1</sup>H NMR (400 MHz, CDCl<sub>3</sub>) spectra

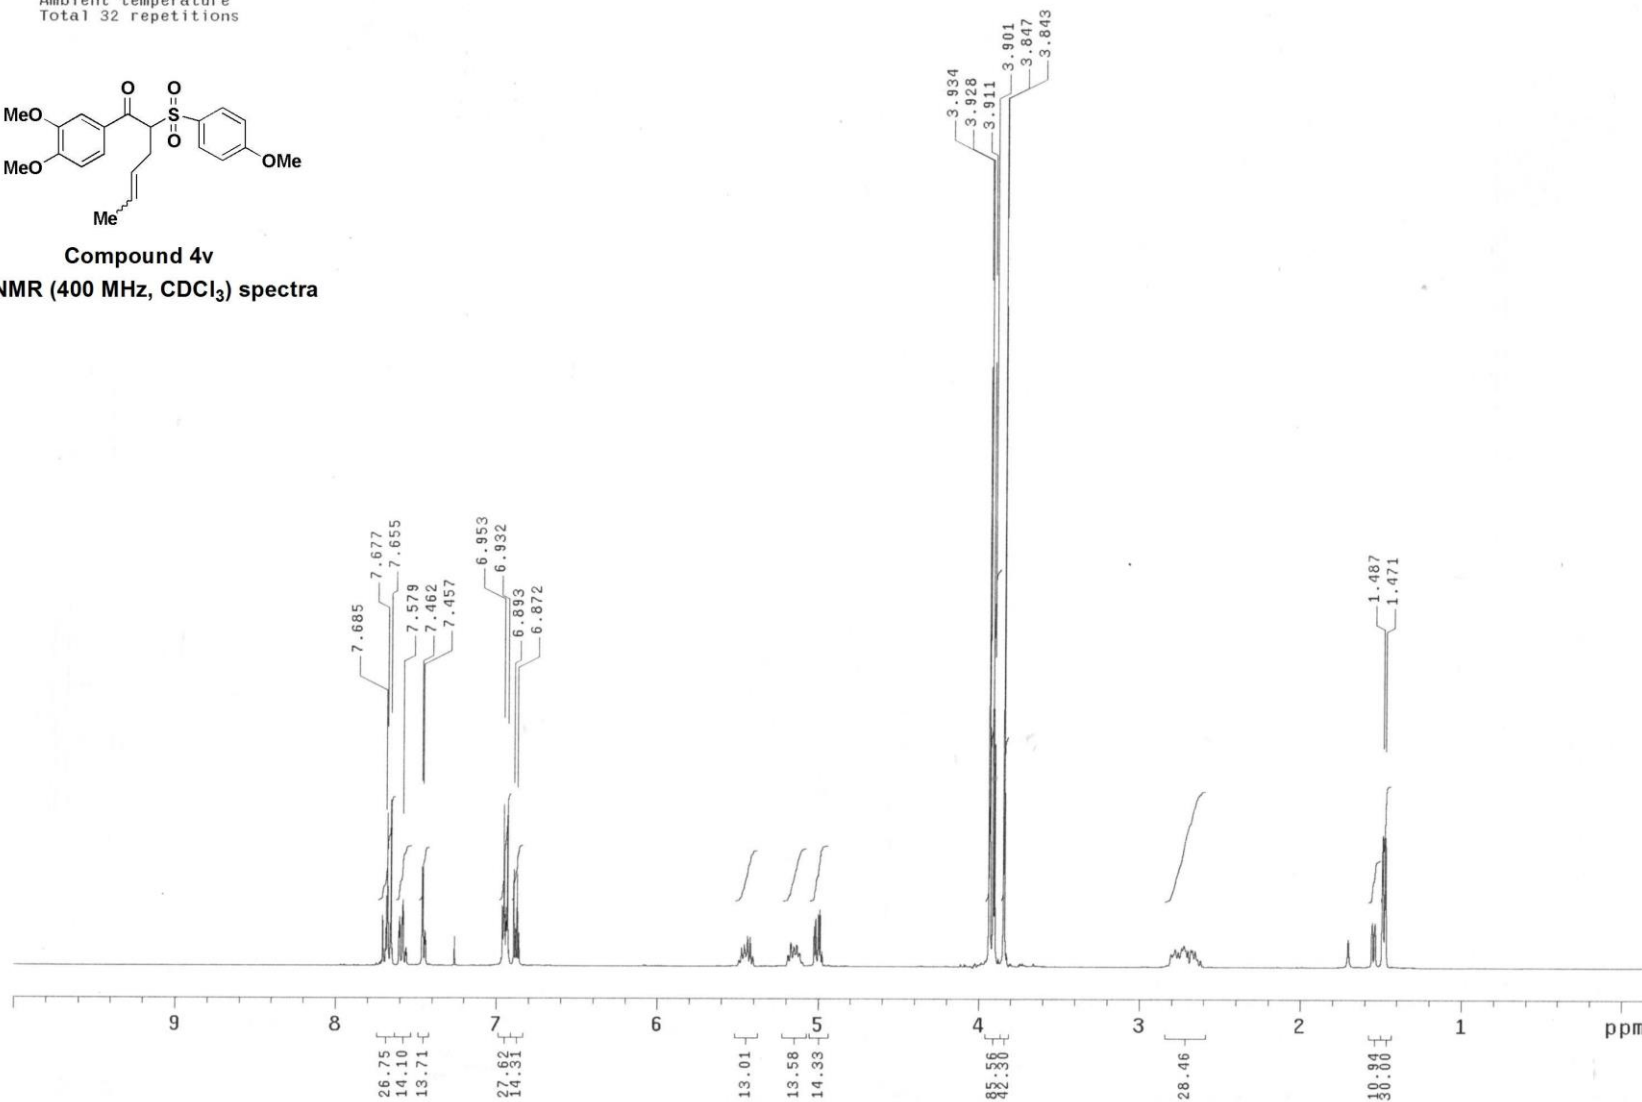

# Compound 4v (<sup>1</sup>H-NMR spectral data-2)

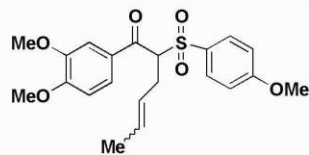

Compound 4v

<sup>1</sup>H NMR (400 MHz, CDCl<sub>3</sub>) spectra

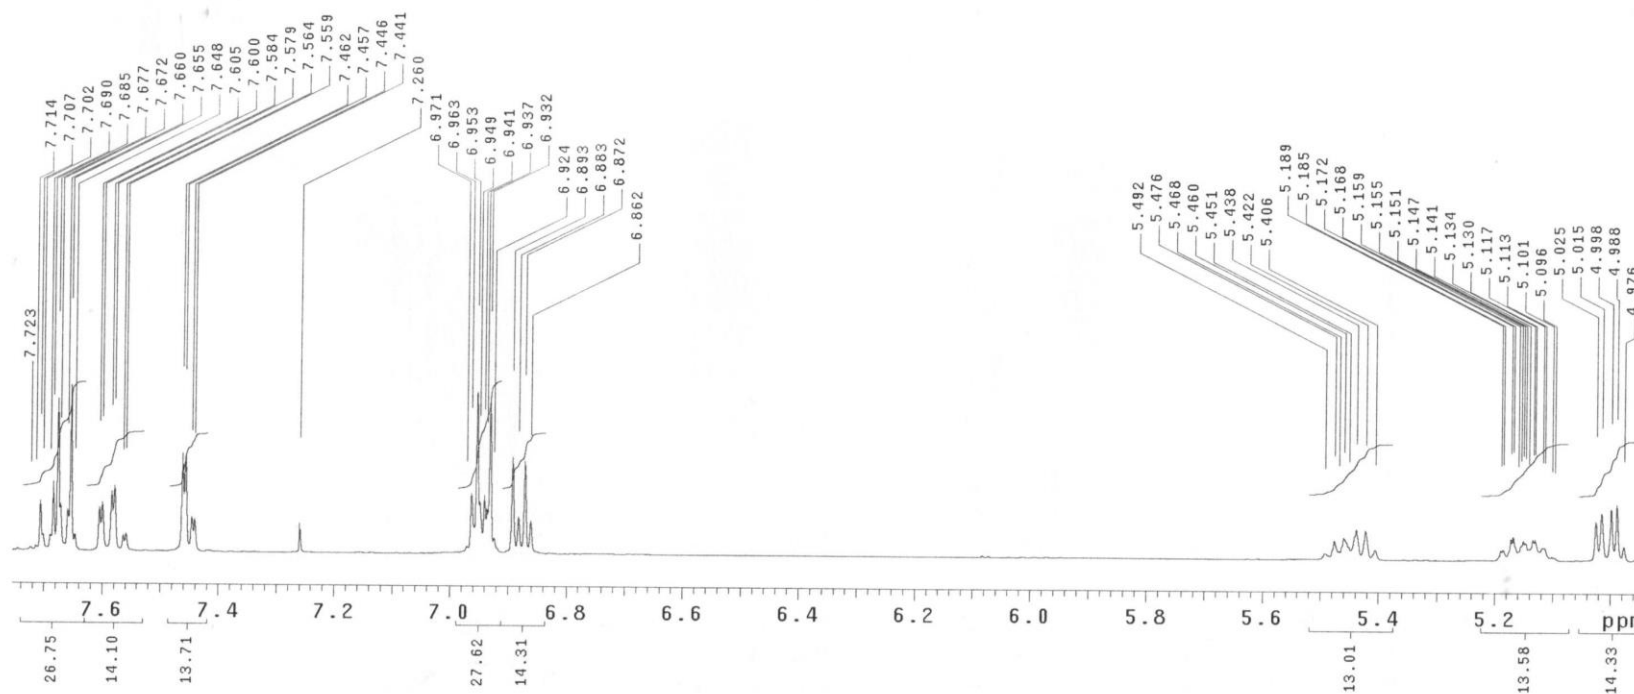

# Compound 4v (<sup>13</sup>C-NMR spectral data)

KSOMeCr

Pulse Sequence: s2pu1

UNITYplus-400 "unity400"

Date: Jan 3 2019

Solvent: CDCl<sub>3</sub>

Ambient temperature

Total 528 repetitions

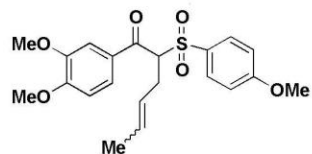

Compound 4v

<sup>13</sup>C NMR (100 MHz, CDCl<sub>3</sub>) spectra

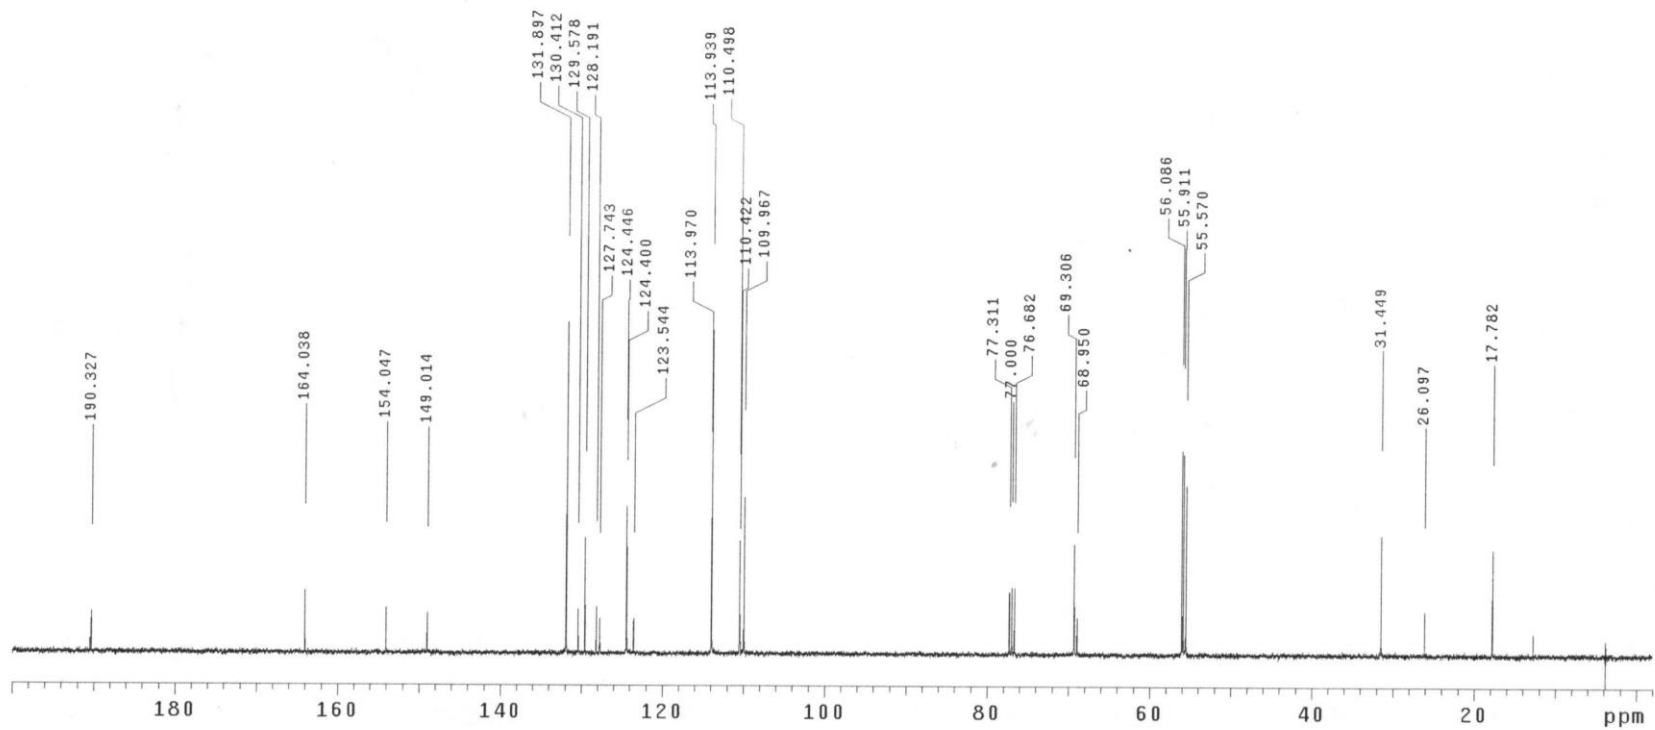

# Compound 4w (<sup>1</sup>H-NMR spectral data-1)

KSPHbUCr

Pulse Sequence: s2pu1

UNITYplus-400 "unity400"

Date: Jan 3 2019

Solvent: CDCl<sub>3</sub>

Ambient temperature

Total 32 repetitions

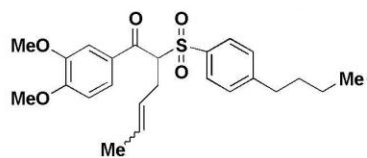

Compound 4w

<sup>1</sup>H NMR (400 MHz, CDCl<sub>3</sub>) spectra

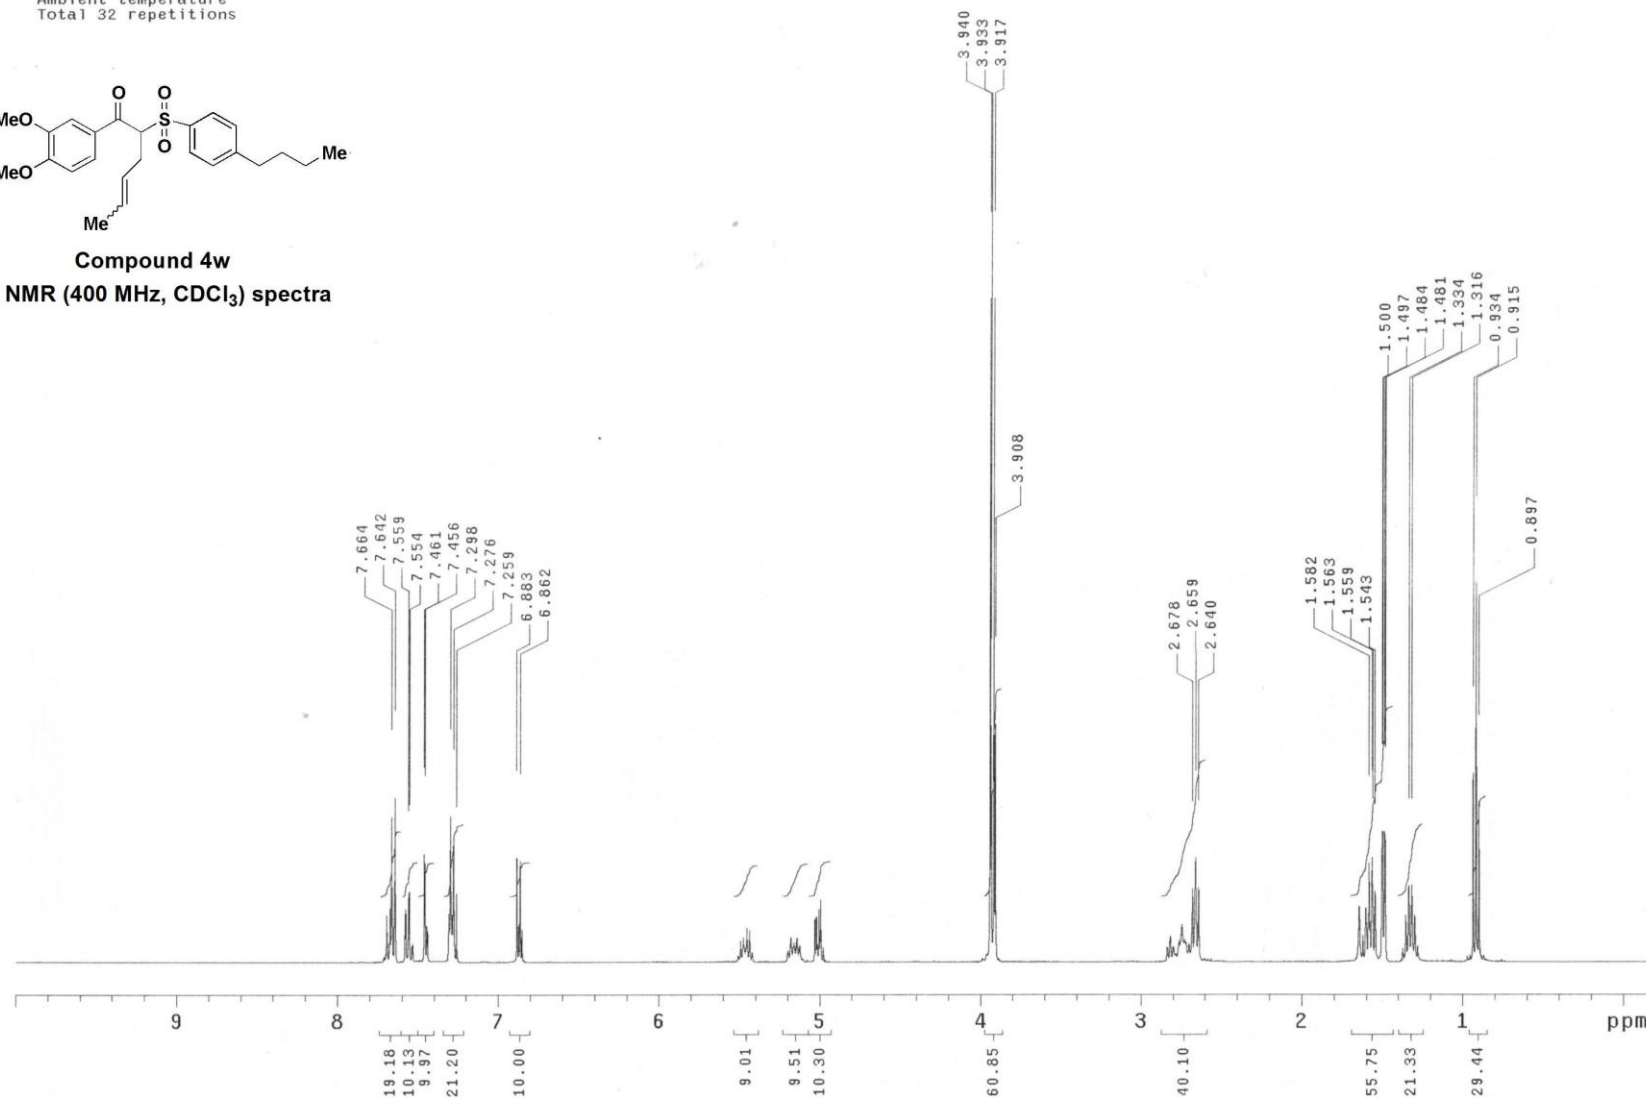

# Compound 4w (<sup>1</sup>H-NMR spectral data-2)

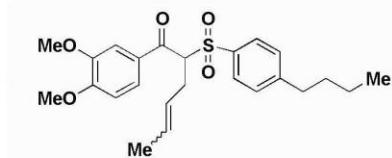

Compound 4w

<sup>1</sup>H NMR (400 MHz, CDCl<sub>3</sub>) spectra

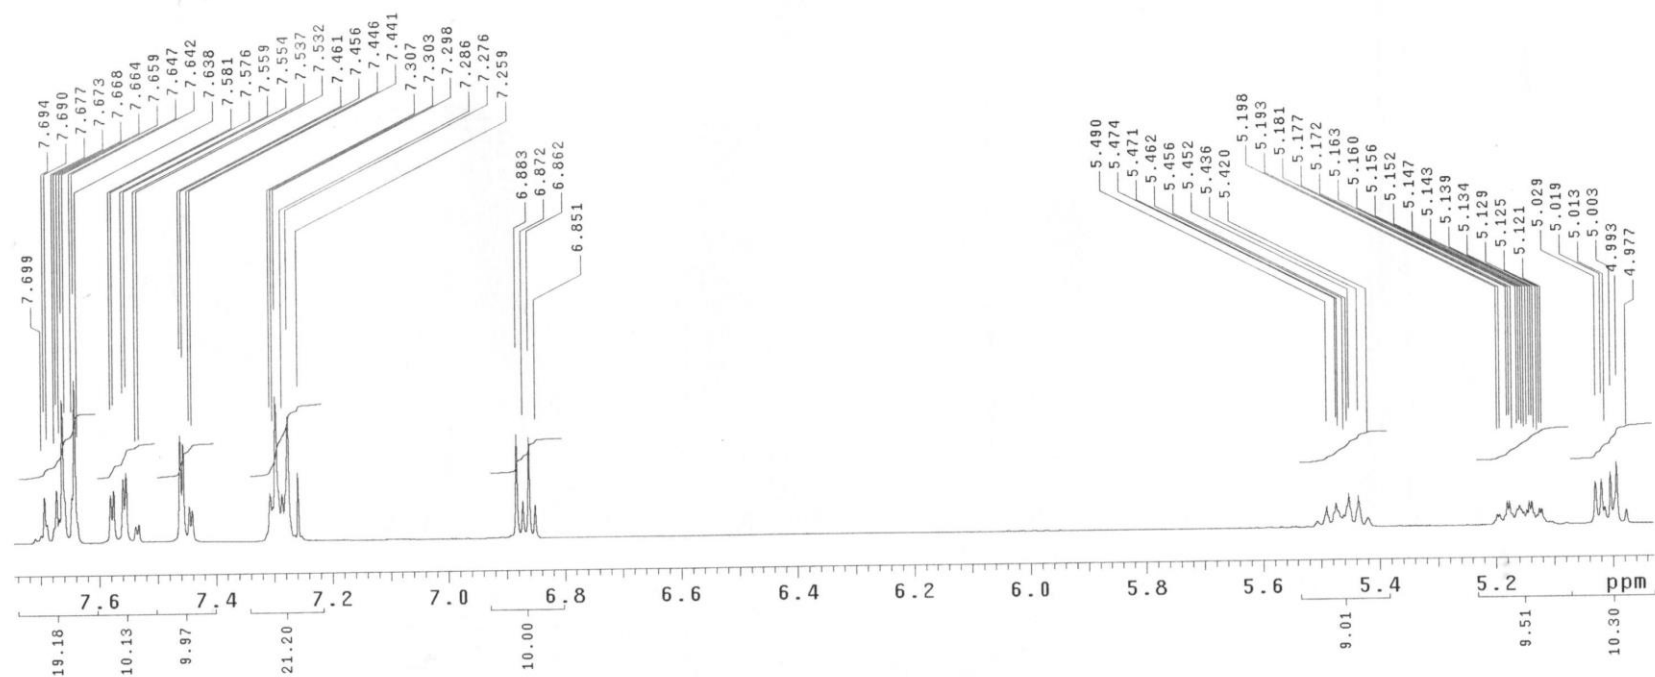

# Compound 4w (<sup>13</sup>C-NMR spectral data)

KSPHbUCr

Pulse Sequence: s2pu1

UNITYplus-400 "unity400"

Date: Jan 3 2019

Solvent: CDCl<sub>3</sub>

Ambient temperature

Total 1248 repetitions

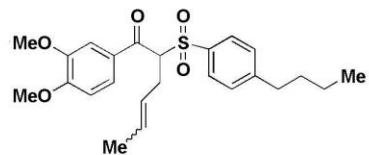

Compound 4w

<sup>13</sup>C NMR (100 MHz, CDCl<sub>3</sub>) spectra

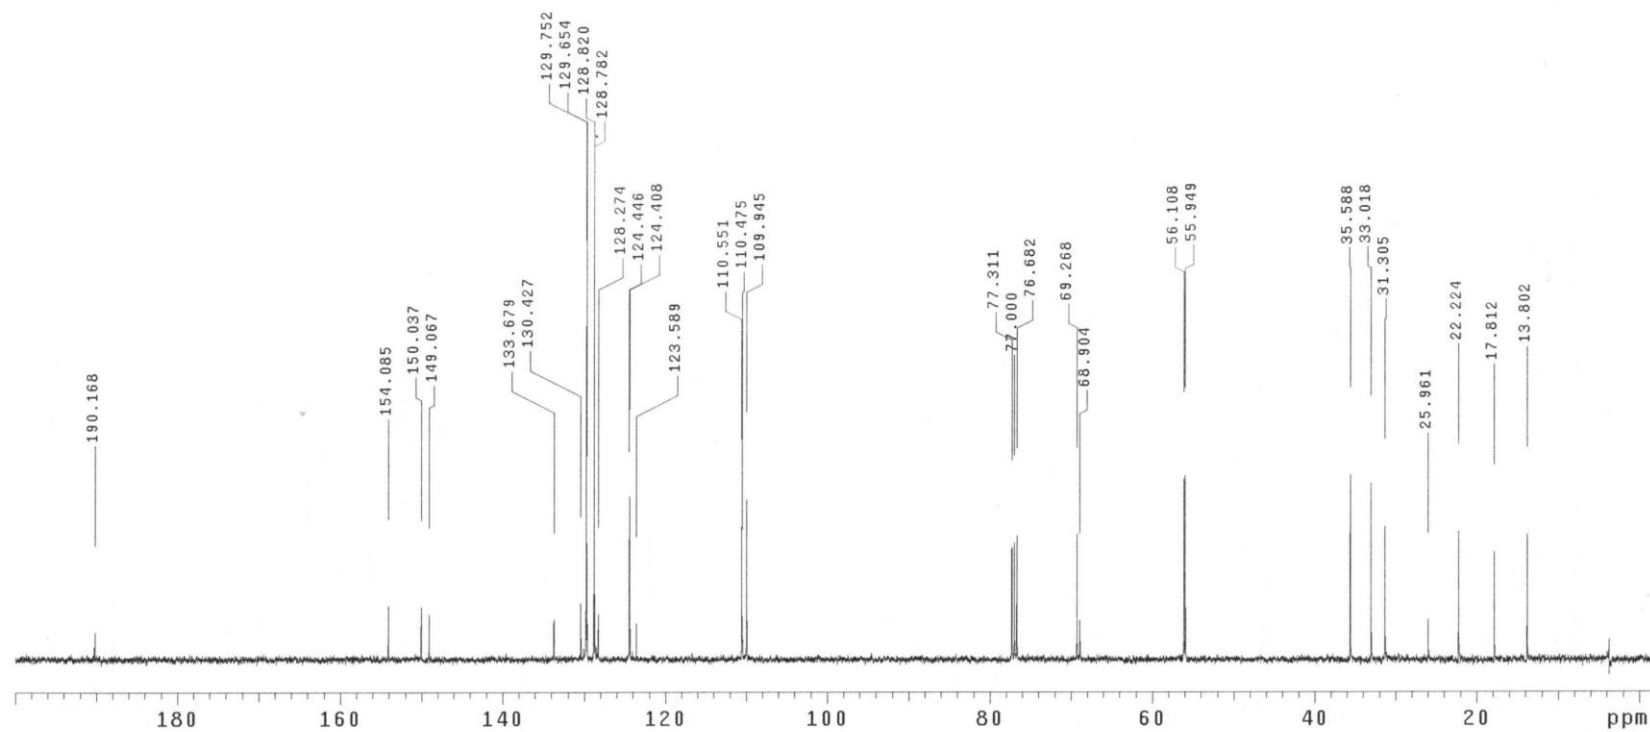

# Compound 4x (<sup>1</sup>H-NMR spectral data-1)

KSTsPr

Pulse Sequence: s2pu1

UNITYplus-400 "unity400"

Date: Jan 9 2019

Solvent: CDCl<sub>3</sub>

Ambient temperature

Total 32 repetitions

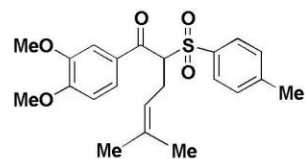

Compound 4x

<sup>1</sup>H NMR (400 MHz, CDCl<sub>3</sub>) spectra

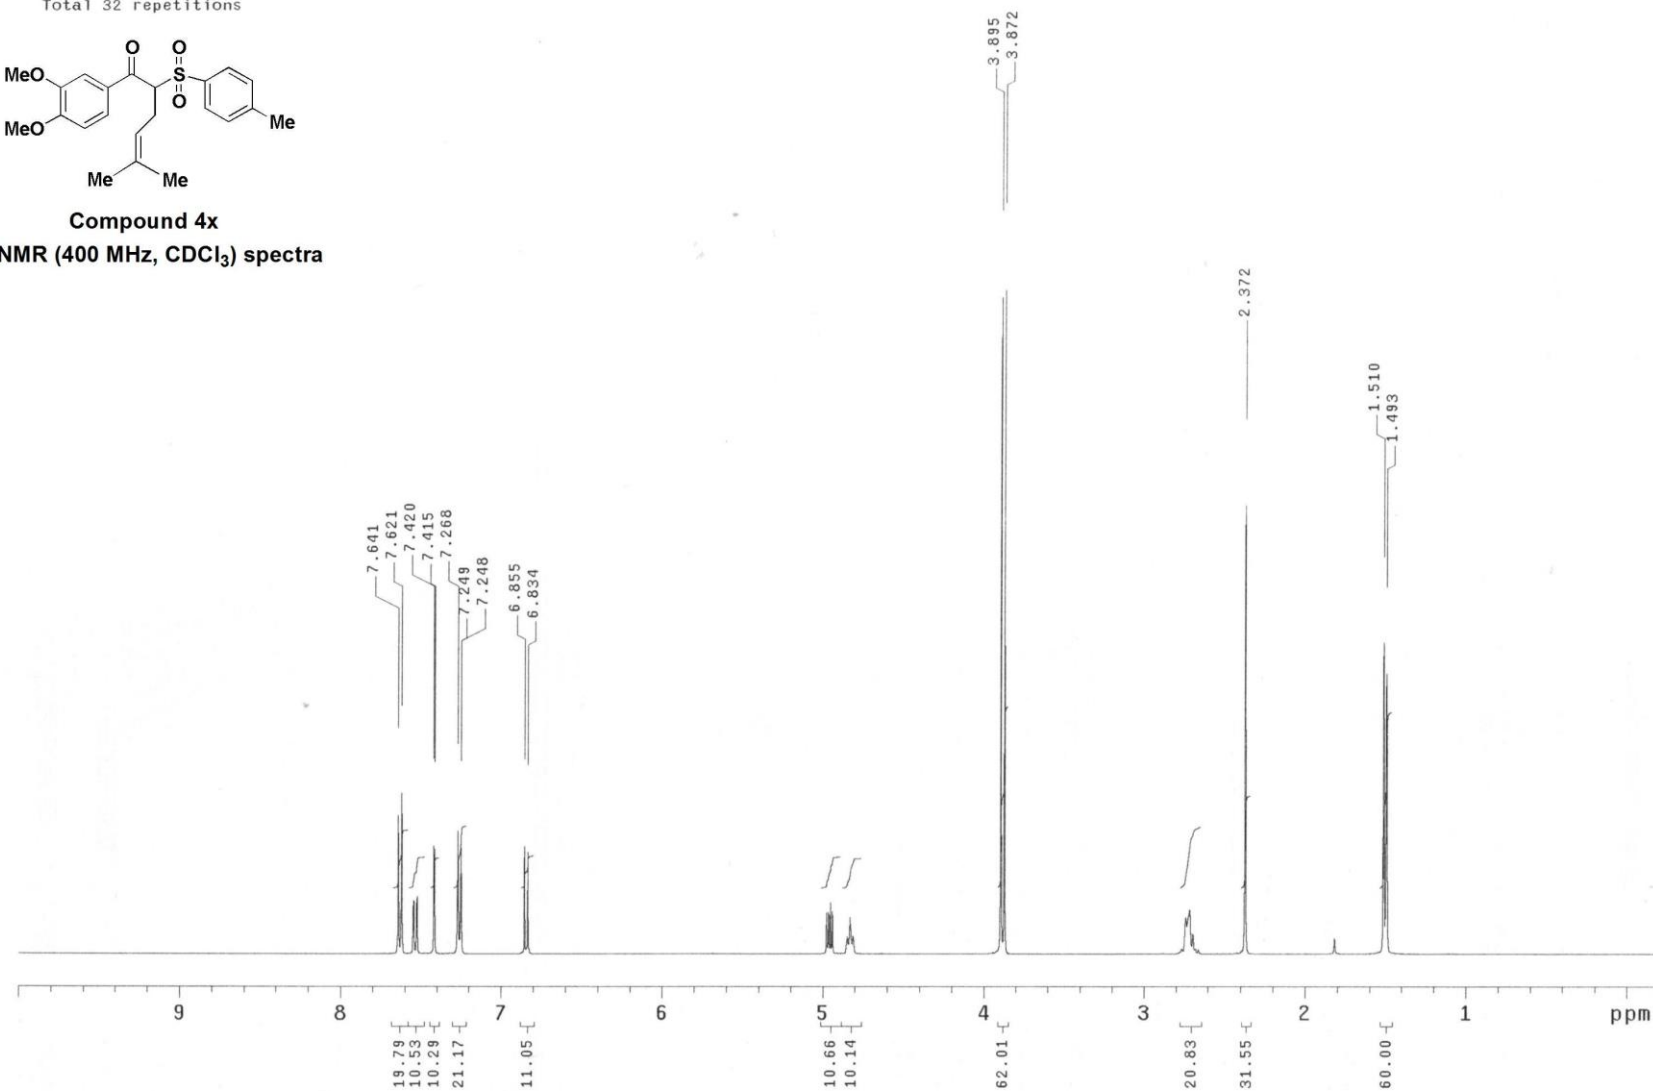

# Compound 4x (<sup>1</sup>H-NMR spectral data-2)

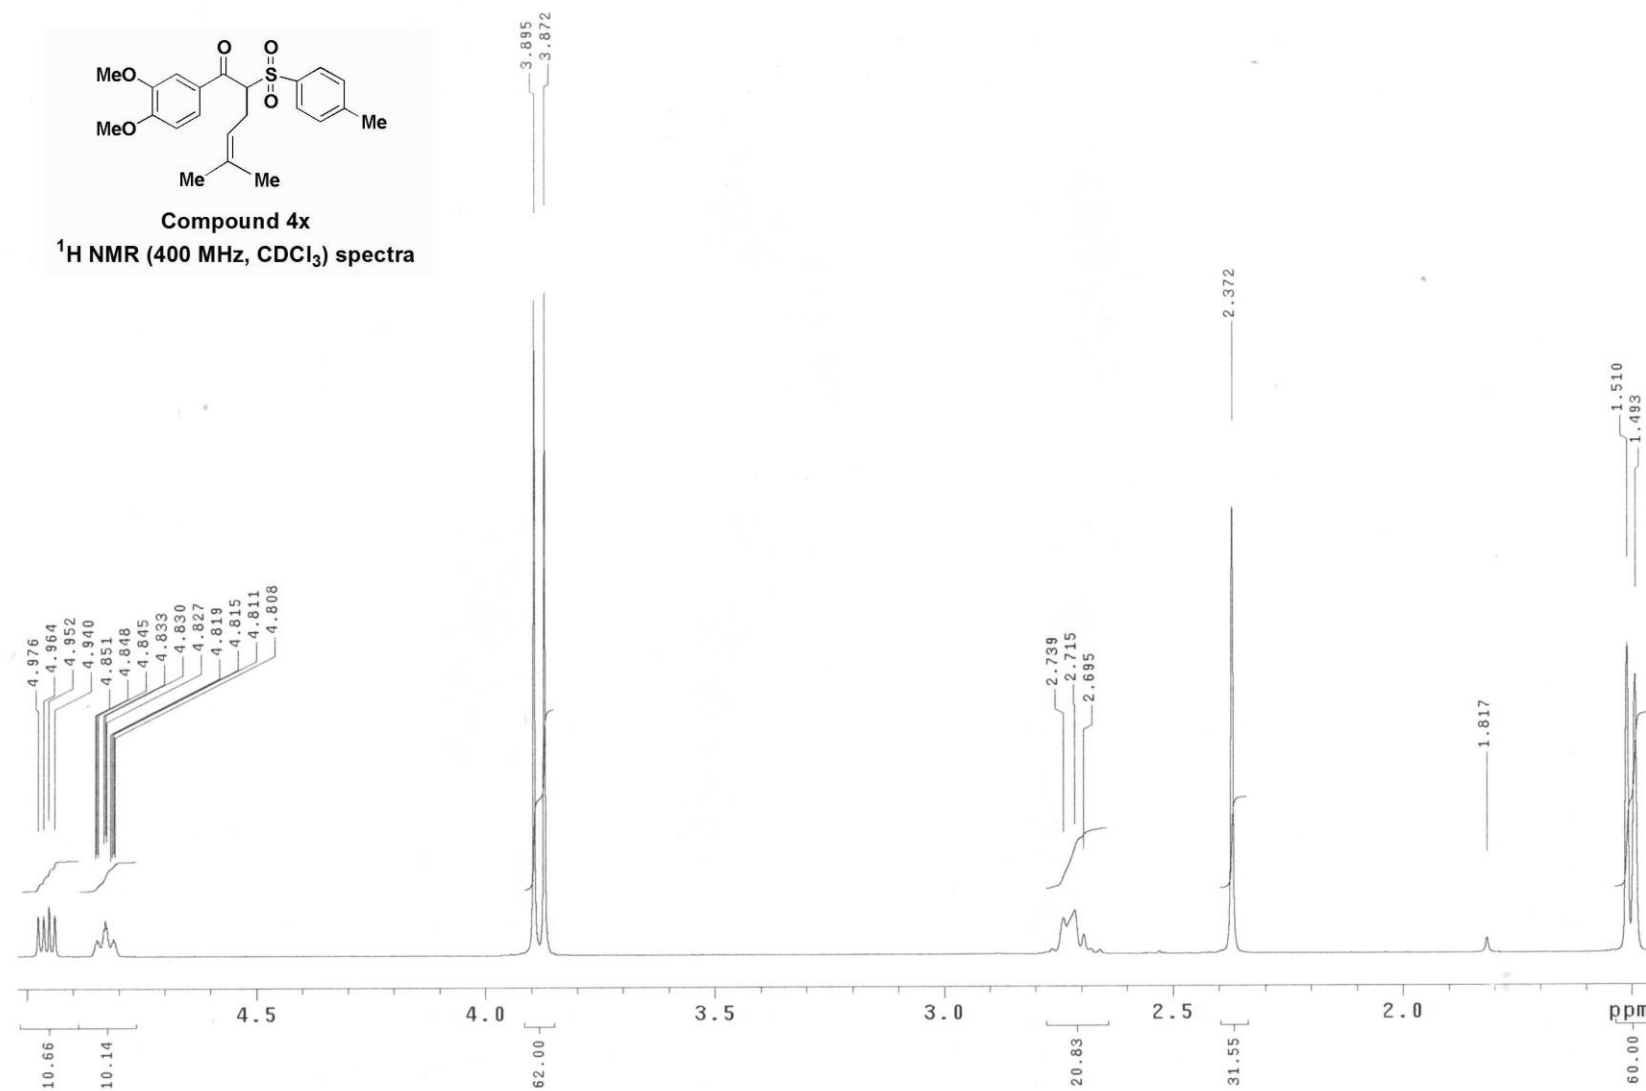

# Compound 4x (<sup>13</sup>C-NMR spectral data)

KSTsPr

Pulse Sequence: s2pu1

UNITYplus-400 "unity400"

Date: Jan 9 2019

Solvent: CDCl<sub>3</sub>

Ambient temperature

Total 336 repetitions

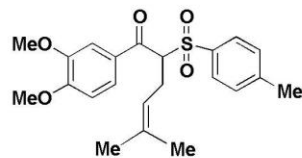

Compound 4x

<sup>13</sup>C NMR (100 MHz, CDCl<sub>3</sub>) spectra

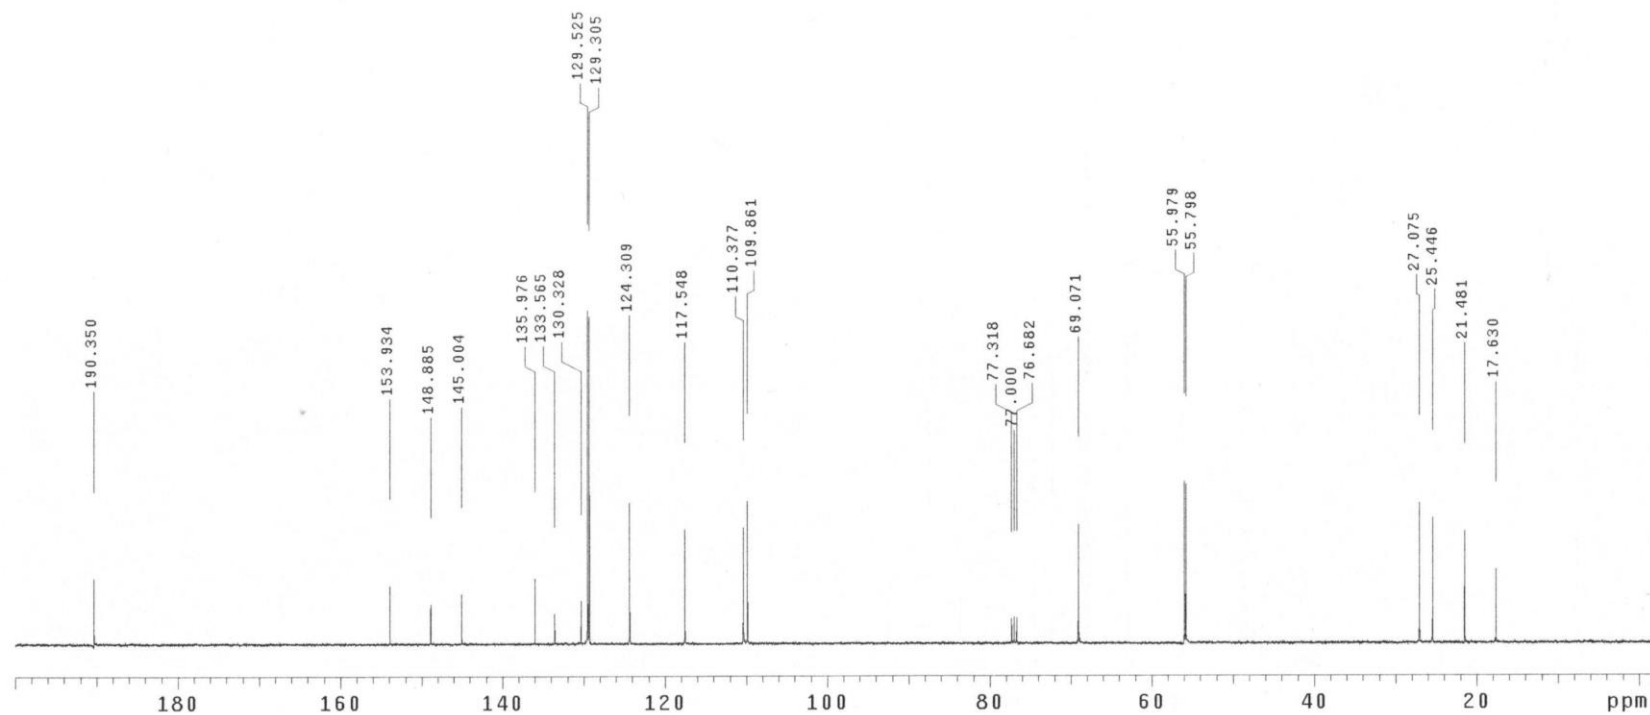

# Compound 4y (<sup>1</sup>H-NMR spectral data-1)

KS4y

Pulse Sequence: s2pu1

UNITYplus-400 "unity400"

Date: May 4 2020

Solvent: CDCl<sub>3</sub>

Ambient temperature

Total 32 repetitions

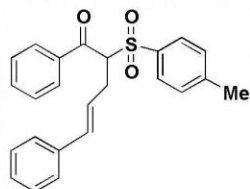

Compound 4y

<sup>1</sup>H NMR (400 MHz, CDCl<sub>3</sub>) spectra

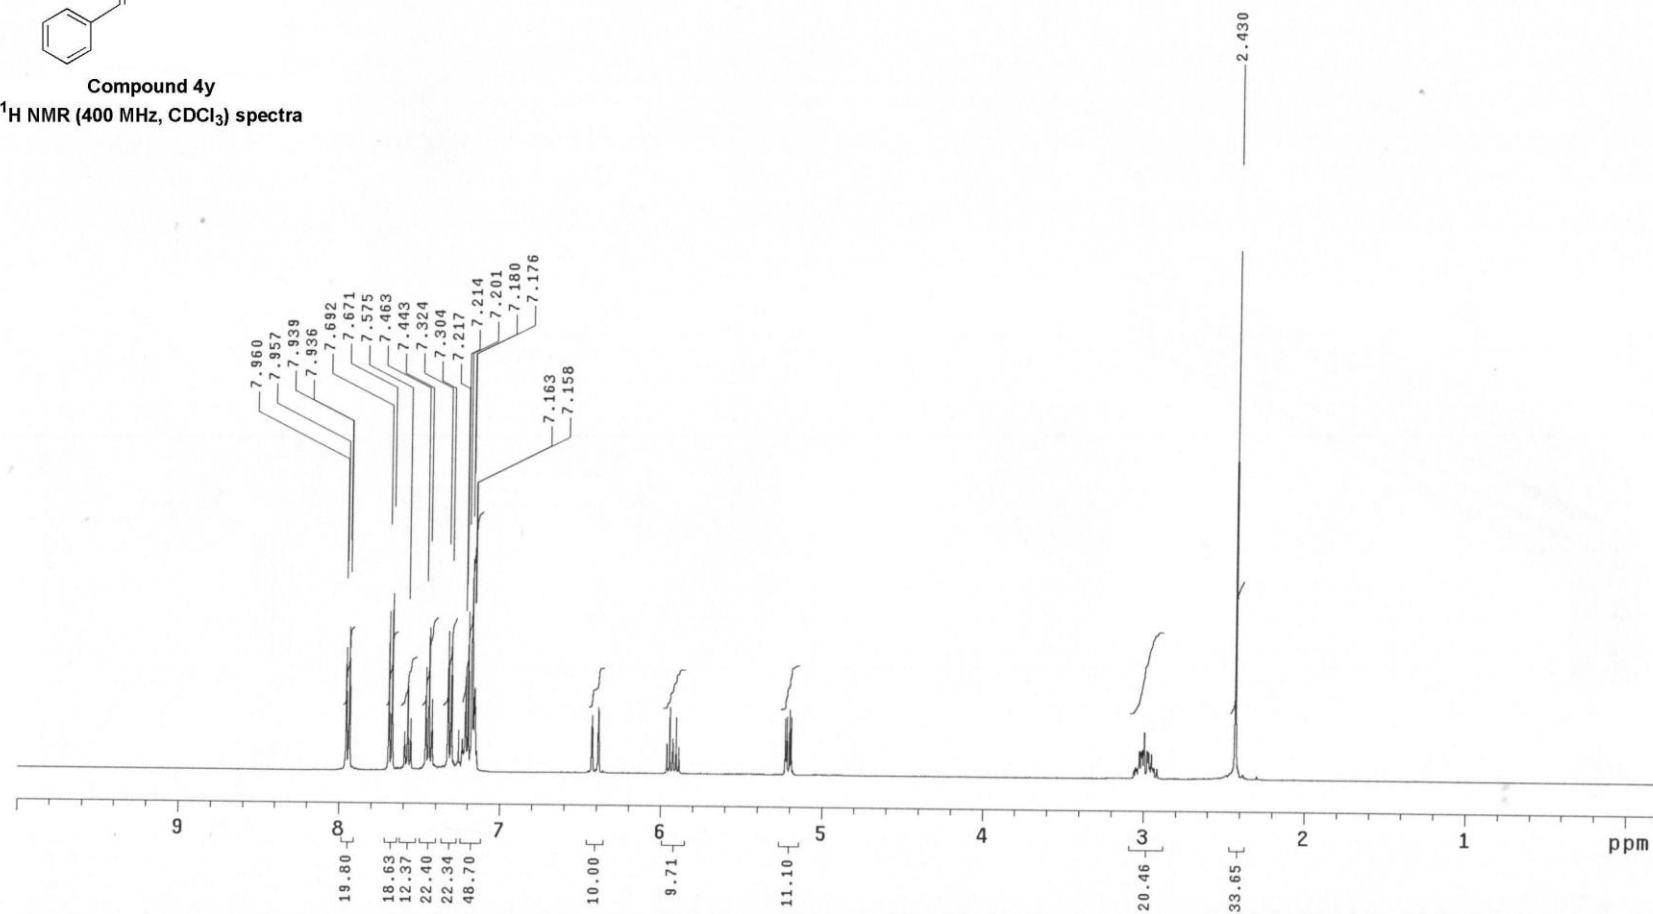

# Compound 4y (<sup>1</sup>H-NMR spectral data-2)

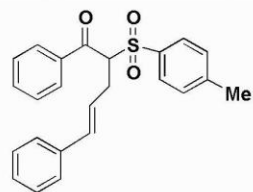

Compound 4y  
<sup>1</sup>H NMR (400 MHz, CDCl<sub>3</sub>) spectra

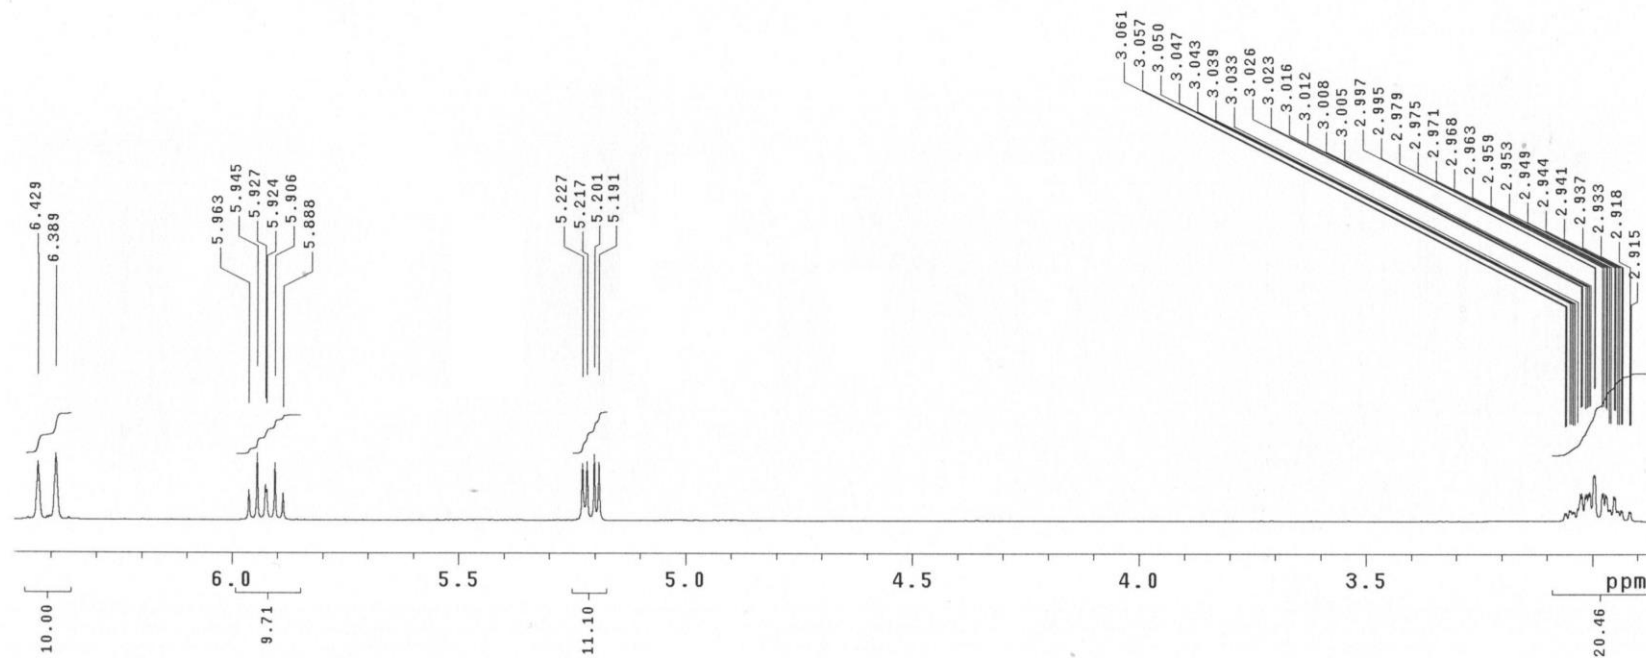

# Compound 4y (<sup>13</sup>C-NMR spectral data)

KS4y

Pulse Sequence: s2pu1

UNITYplus-400 "unity400"

Date: May 4 2020

Solvent: CDCl<sub>3</sub>

Ambient temperature

Total 704 repetitions

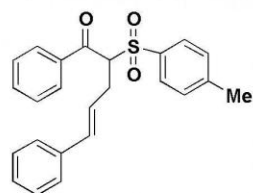

Compound 4y

<sup>13</sup>C NMR (100 MHz, CDCl<sub>3</sub>) spectra

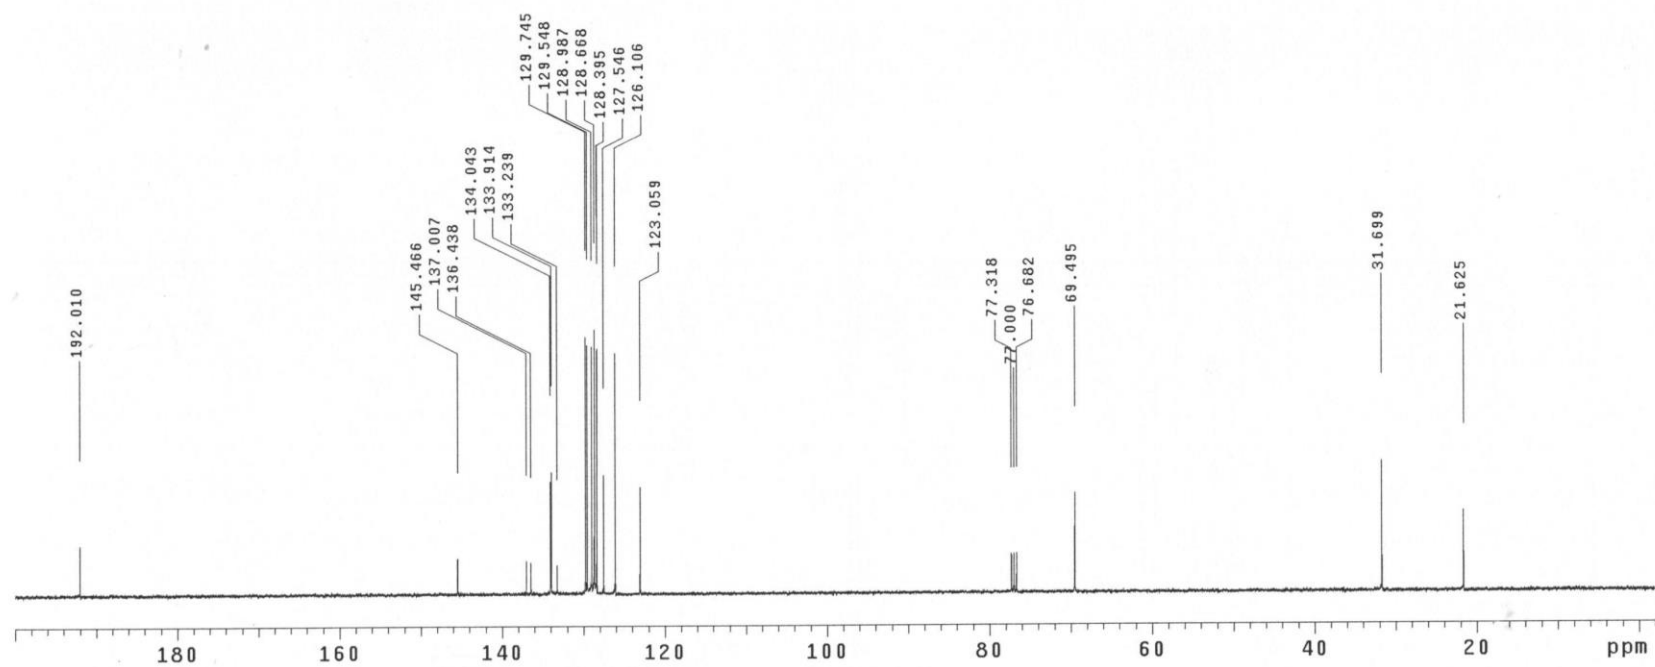

# Compound 5a (<sup>1</sup>H-NMR spectral data-1)

KSTSCrB

Pulse Sequence: s2pu1

UNITYplus-400 "unity400"

Date: Apr 17 2020

Solvent: CDCl<sub>3</sub>

Ambient temperature

Total 32 repetitions

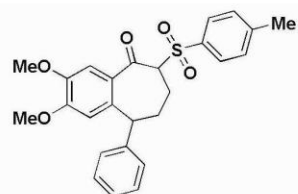

Compound 5a

<sup>1</sup>H NMR (400 MHz, CDCl<sub>3</sub>) spectra

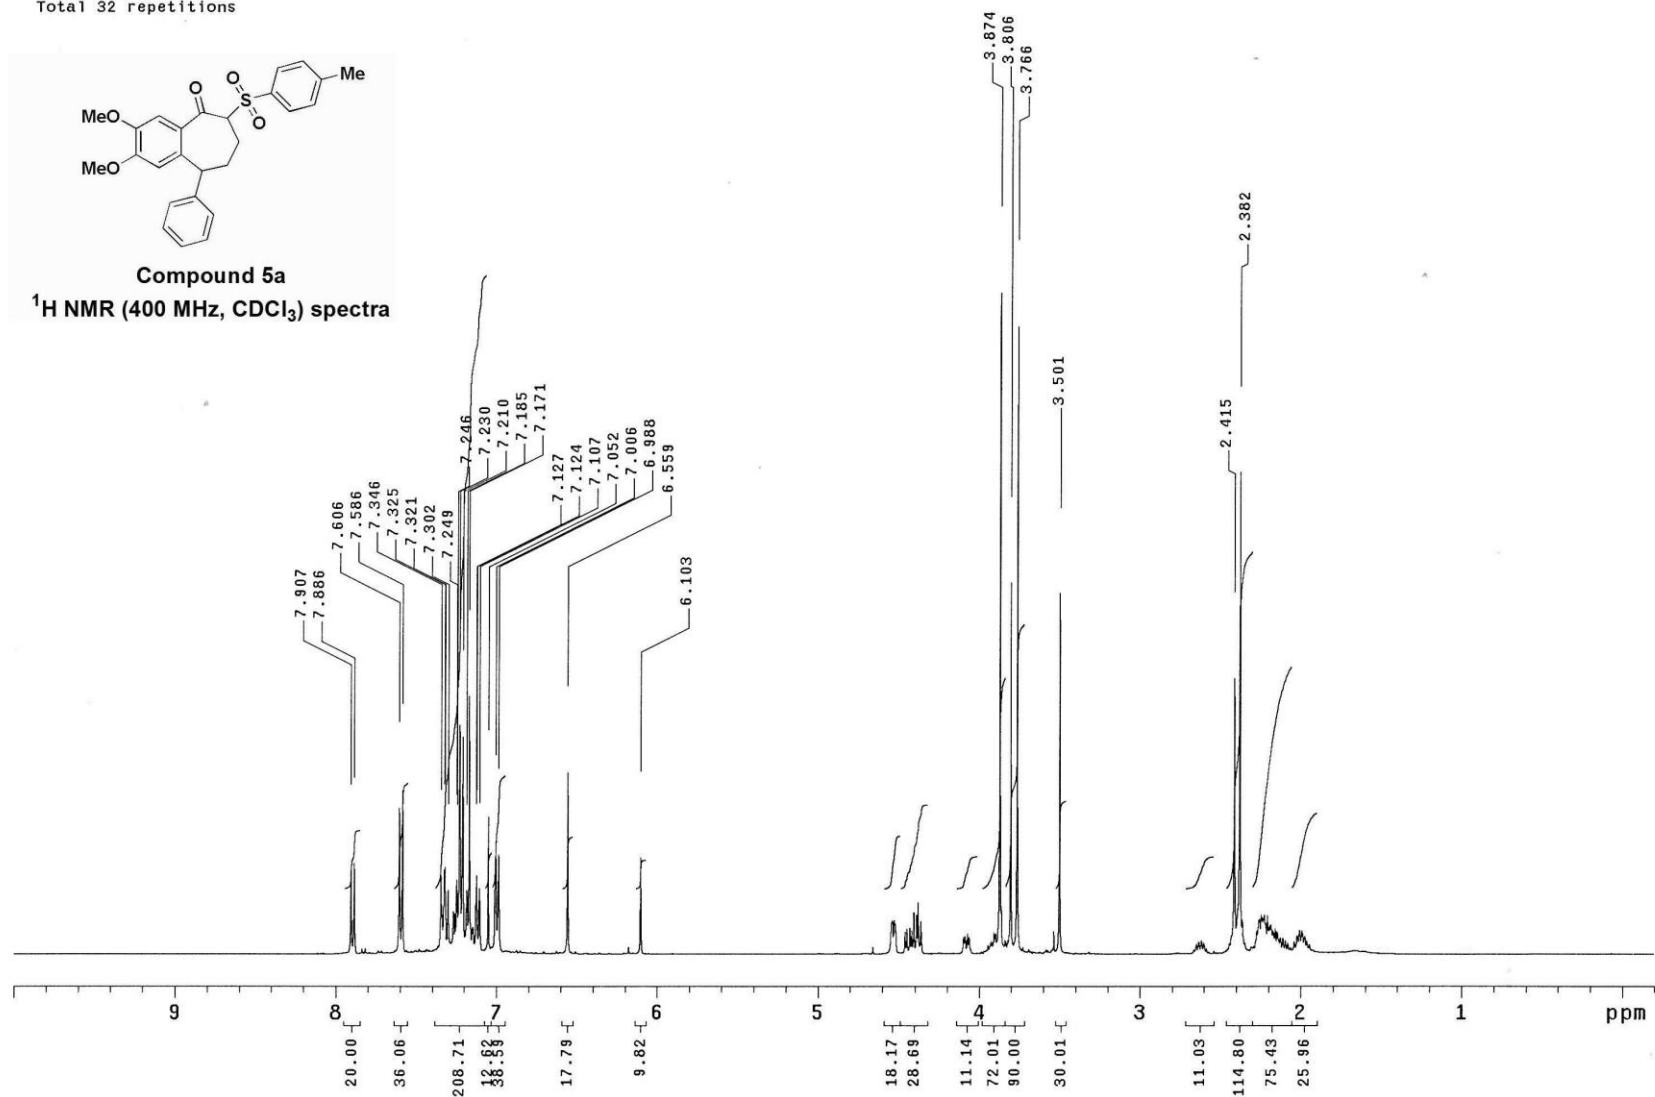

# Compound 5a (<sup>1</sup>H-NMR spectral data-2)

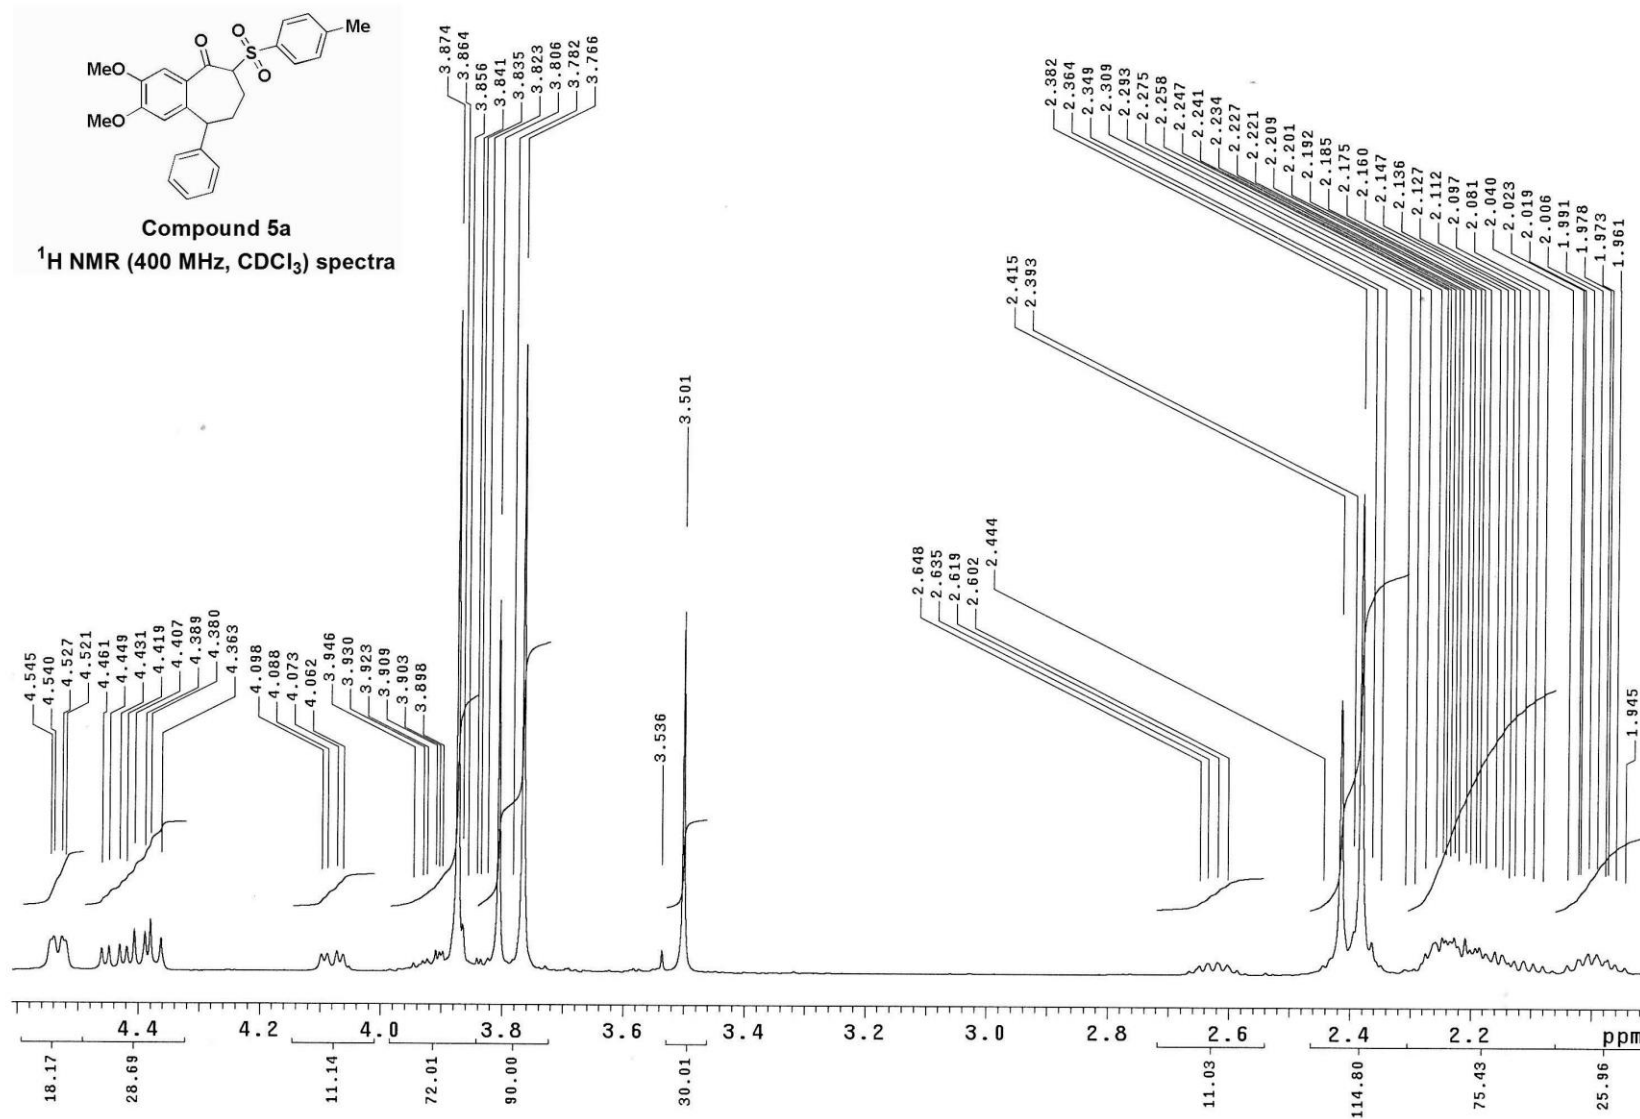

# Compound 5a (<sup>13</sup>C-NMR spectral data)

KSTSCrB

Pulse Sequence: s2pu1

UNITYplus-400 "unity400"

Date: Apr 17 2020

Solvent: CDCl<sub>3</sub>

Ambient temperature

Total 800 repetitions

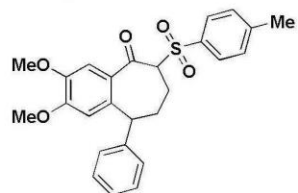

Compound 5a

<sup>13</sup>C NMR (100 MHz, CDCl<sub>3</sub>) spectra

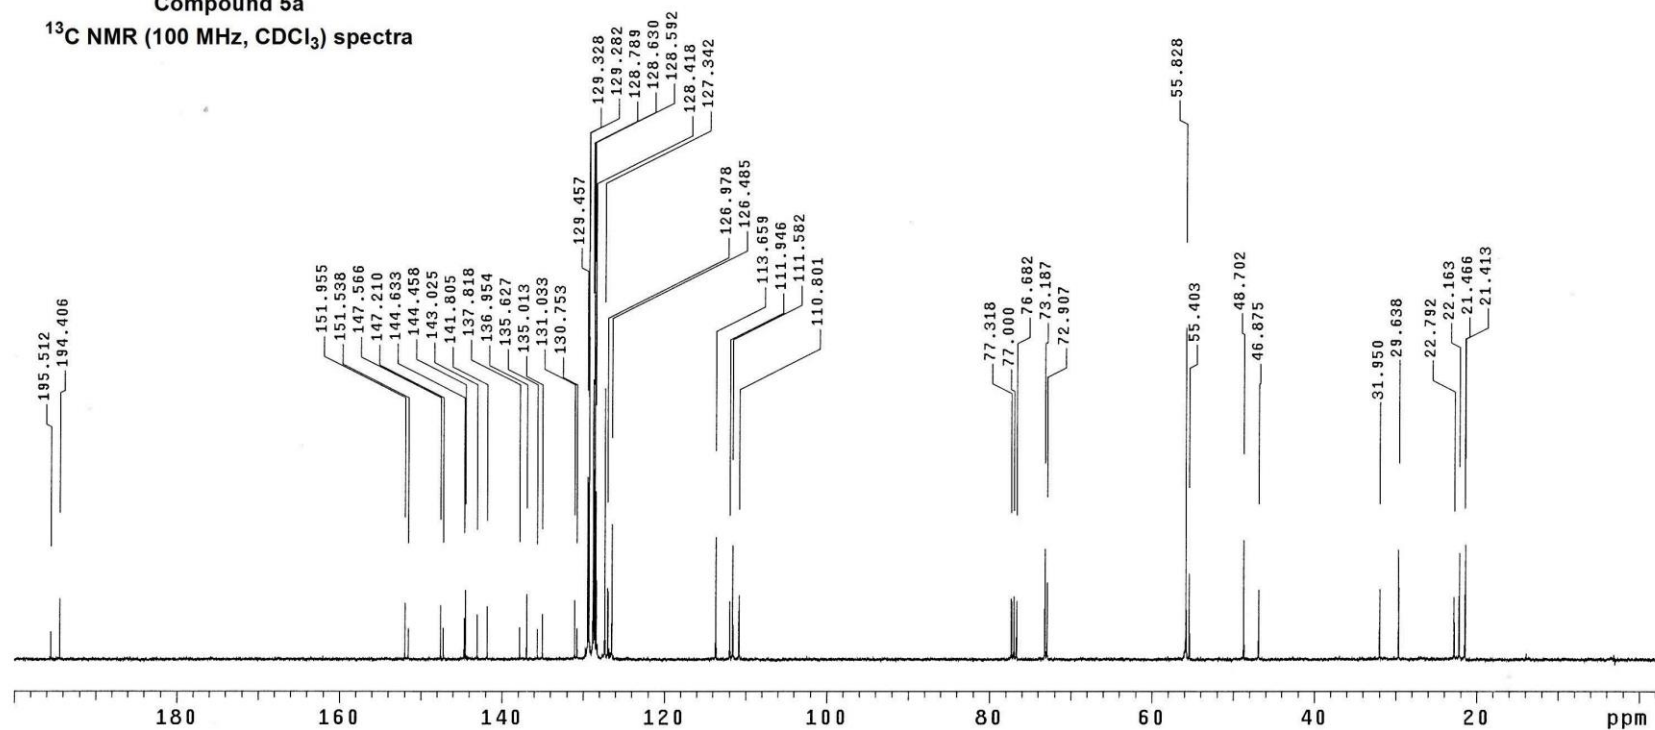

# Compound 5b (<sup>1</sup>H-NMR spectral data-1)

KSE8CBF

Pulse Sequence: s2pu1

UNITYplus-400 "unity400"

Date: Sep 20 2018

Solvent: CDCl<sub>3</sub>

Ambient temperature

Total 32 repetitions

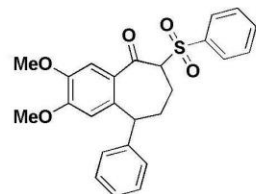

Compound 5b

<sup>1</sup>H NMR (400 MHz, CDCl<sub>3</sub>) spectra

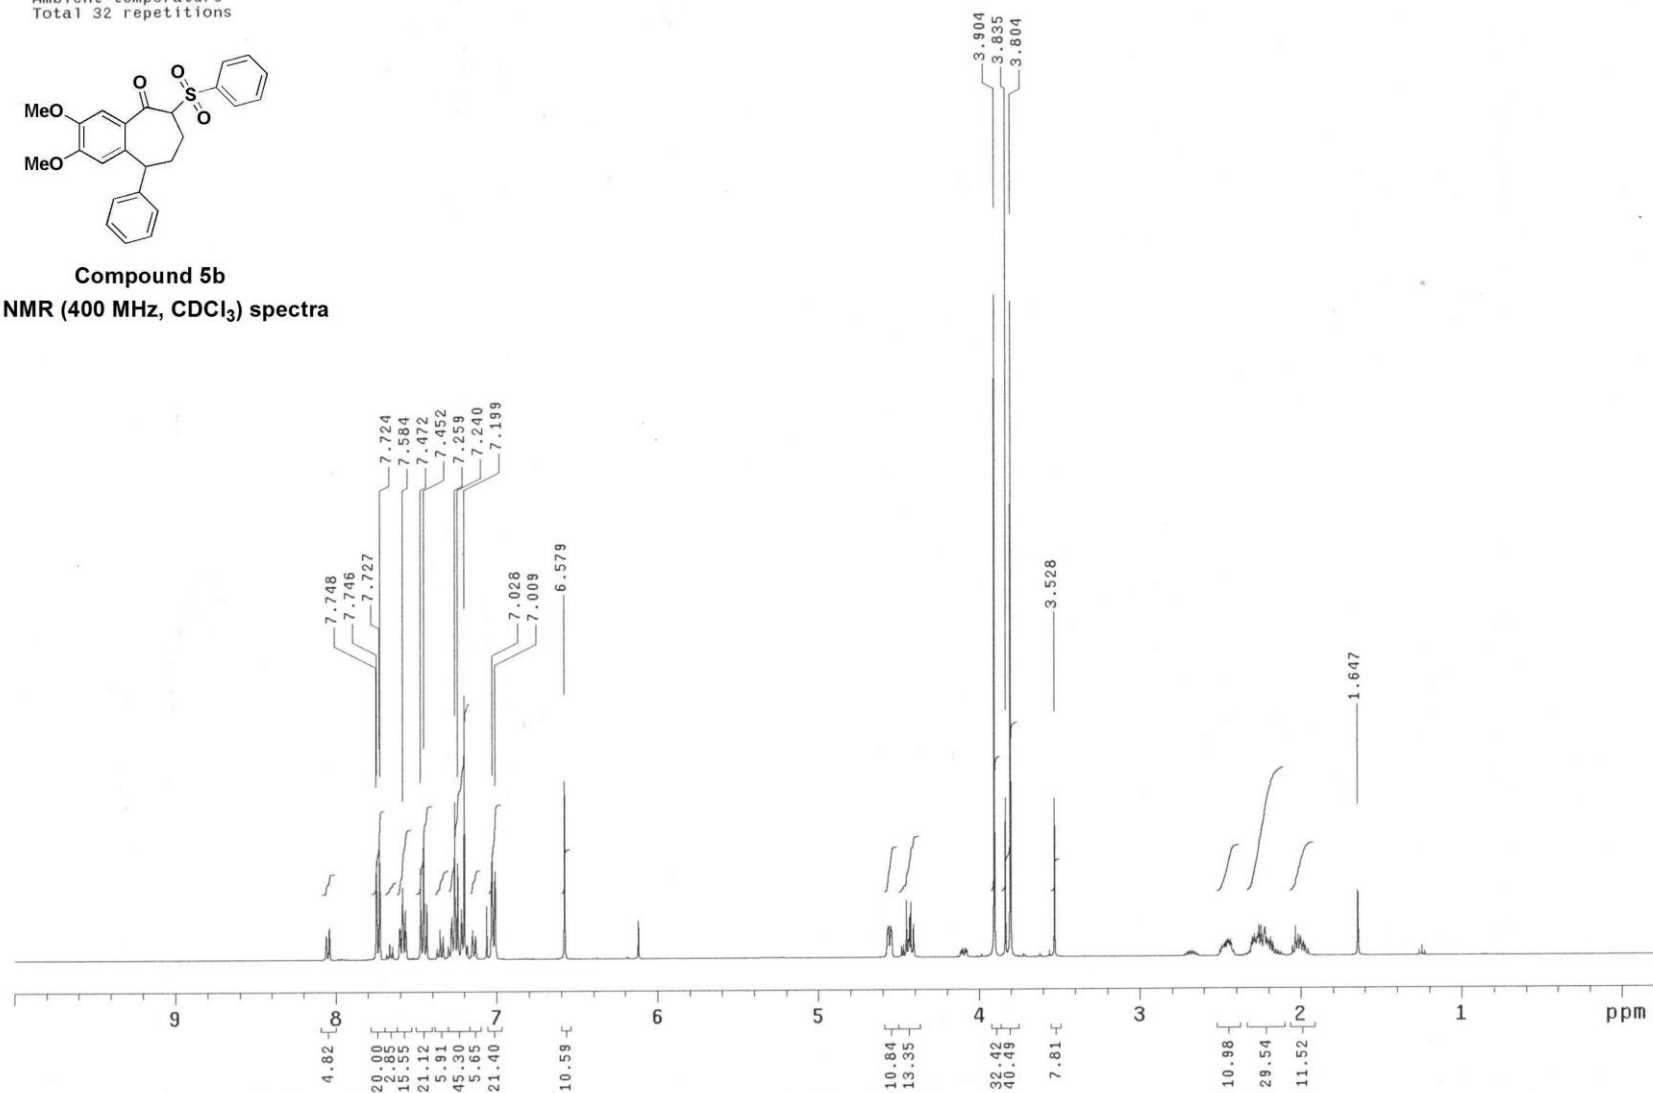

# Compound 5b (<sup>1</sup>H-NMR spectral data-2)

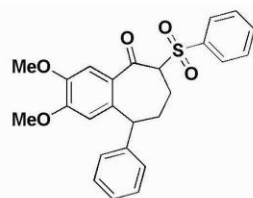

Compound 5b

<sup>1</sup>H NMR (400 MHz, CDCl<sub>3</sub>) spectra

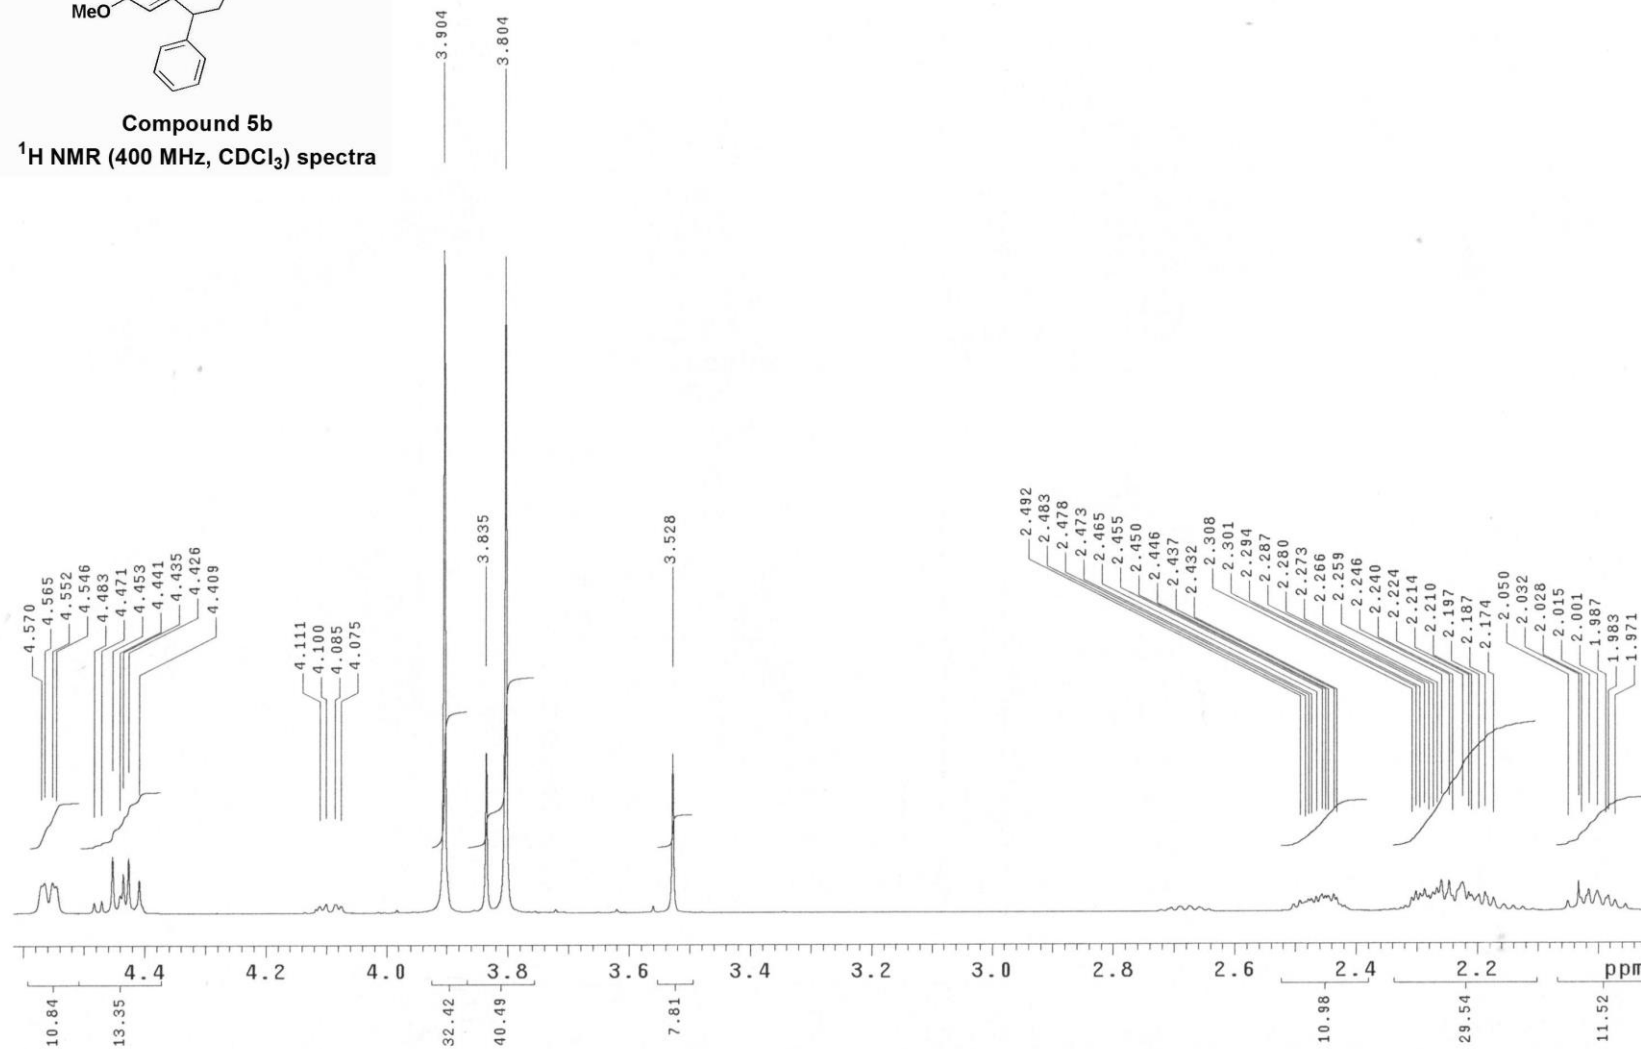

# Compound 5b ( $^{13}\text{C}$ -NMR spectral data)

KSE8CBF

Pulse Sequence: s2pu1

UNITYplus-400 "unity400"

Date: Sep 20 2018

Solvent:  $\text{CDCl}_3$

Ambient temperature

Total 640 repetitions

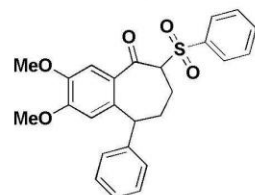

Compound 5b

$^{13}\text{C}$  NMR (100 MHz,  $\text{CDCl}_3$ ) spectra

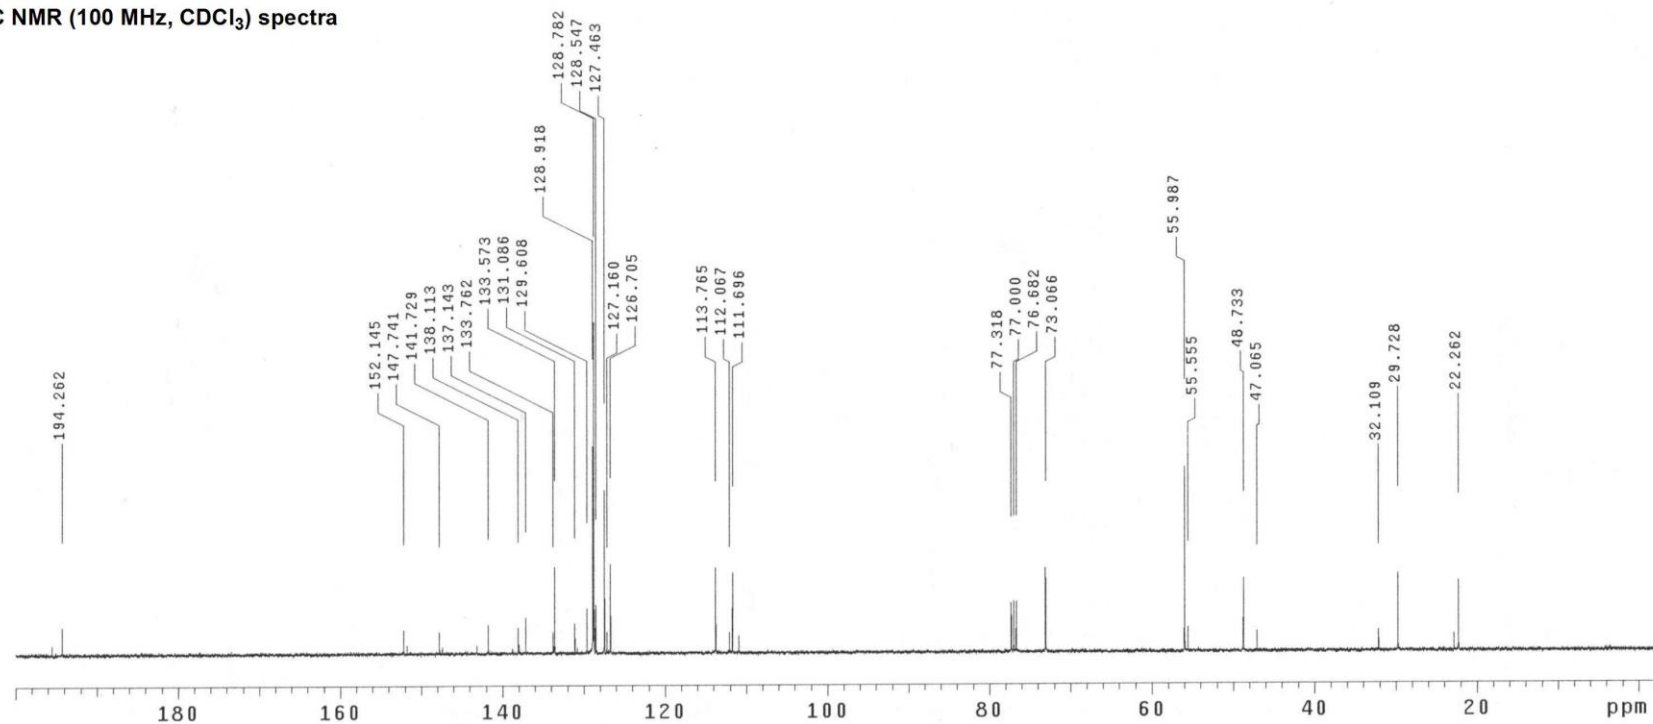

# Compound 5c (<sup>1</sup>H-NMR spectral data-1)

KSSC

Pulse Sequence: s2pu1

UNITYplus-400 "unity400"

Date: May 4 2020

Solvent: CDCl<sub>3</sub>

Ambient temperature

Total 32 repetitions

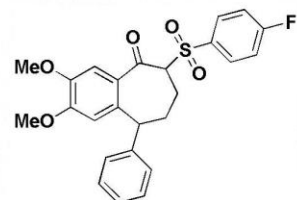

Compound 5c

<sup>1</sup>H NMR (400 MHz, CDCl<sub>3</sub>) spectra

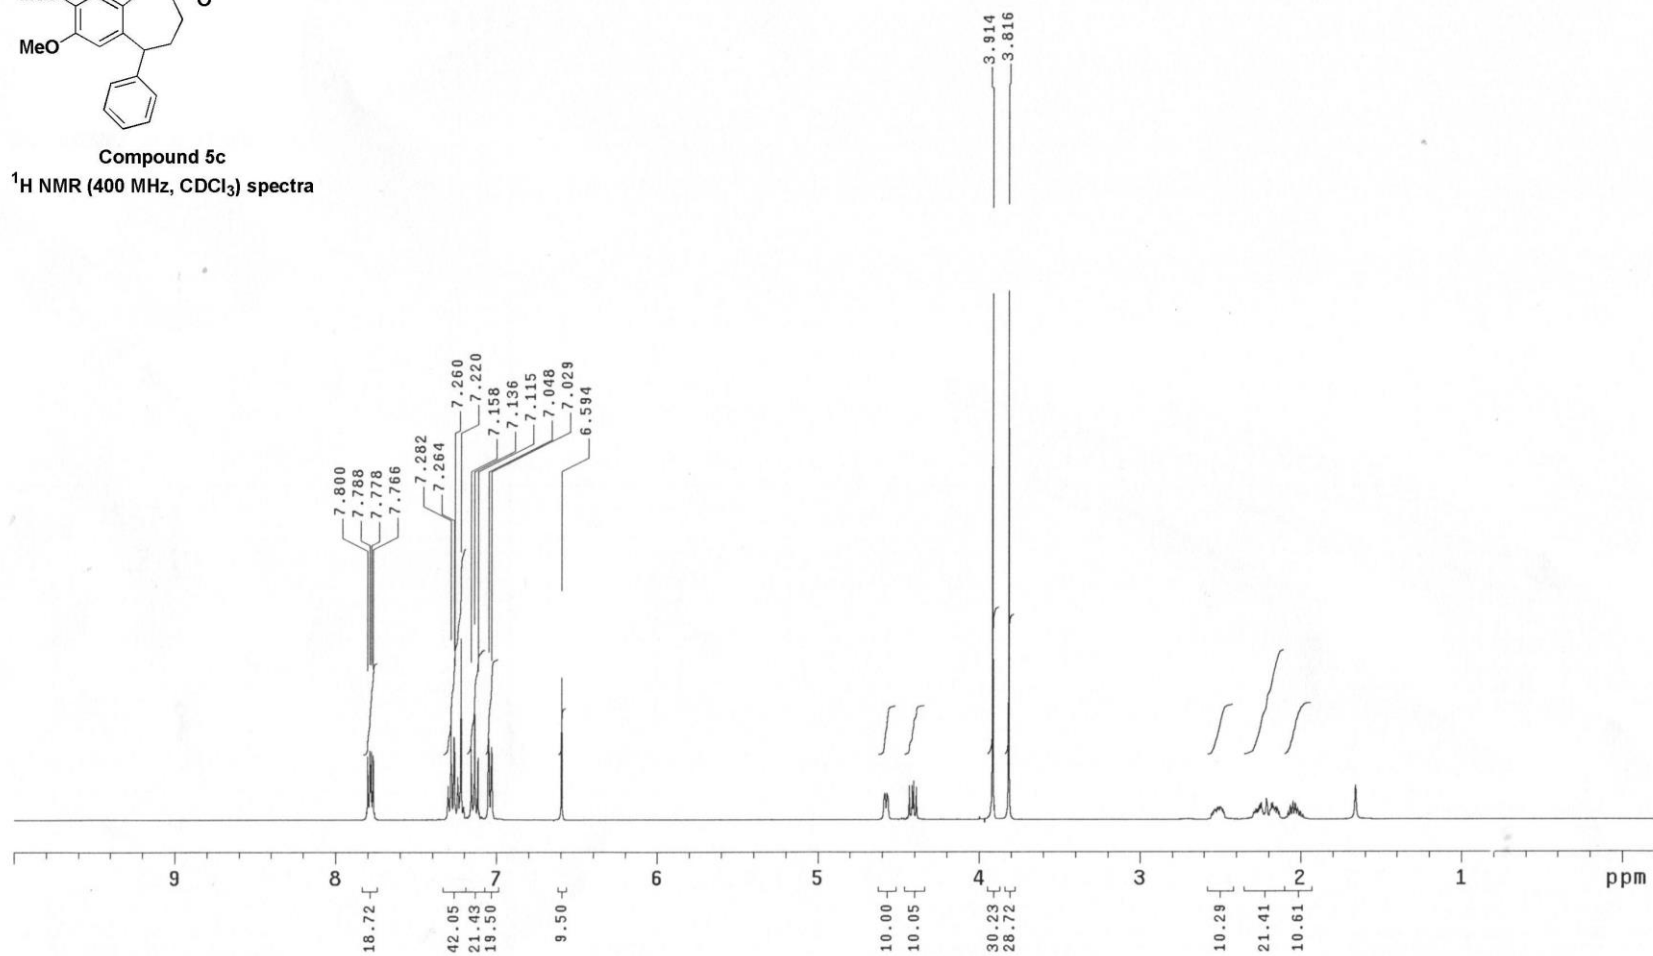

# Compound 5c (<sup>1</sup>H-NMR spectral data-2)

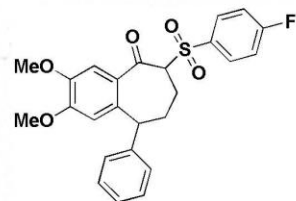

Compound 5c  
<sup>1</sup>H NMR (400 MHz, CDCl<sub>3</sub>) spectra

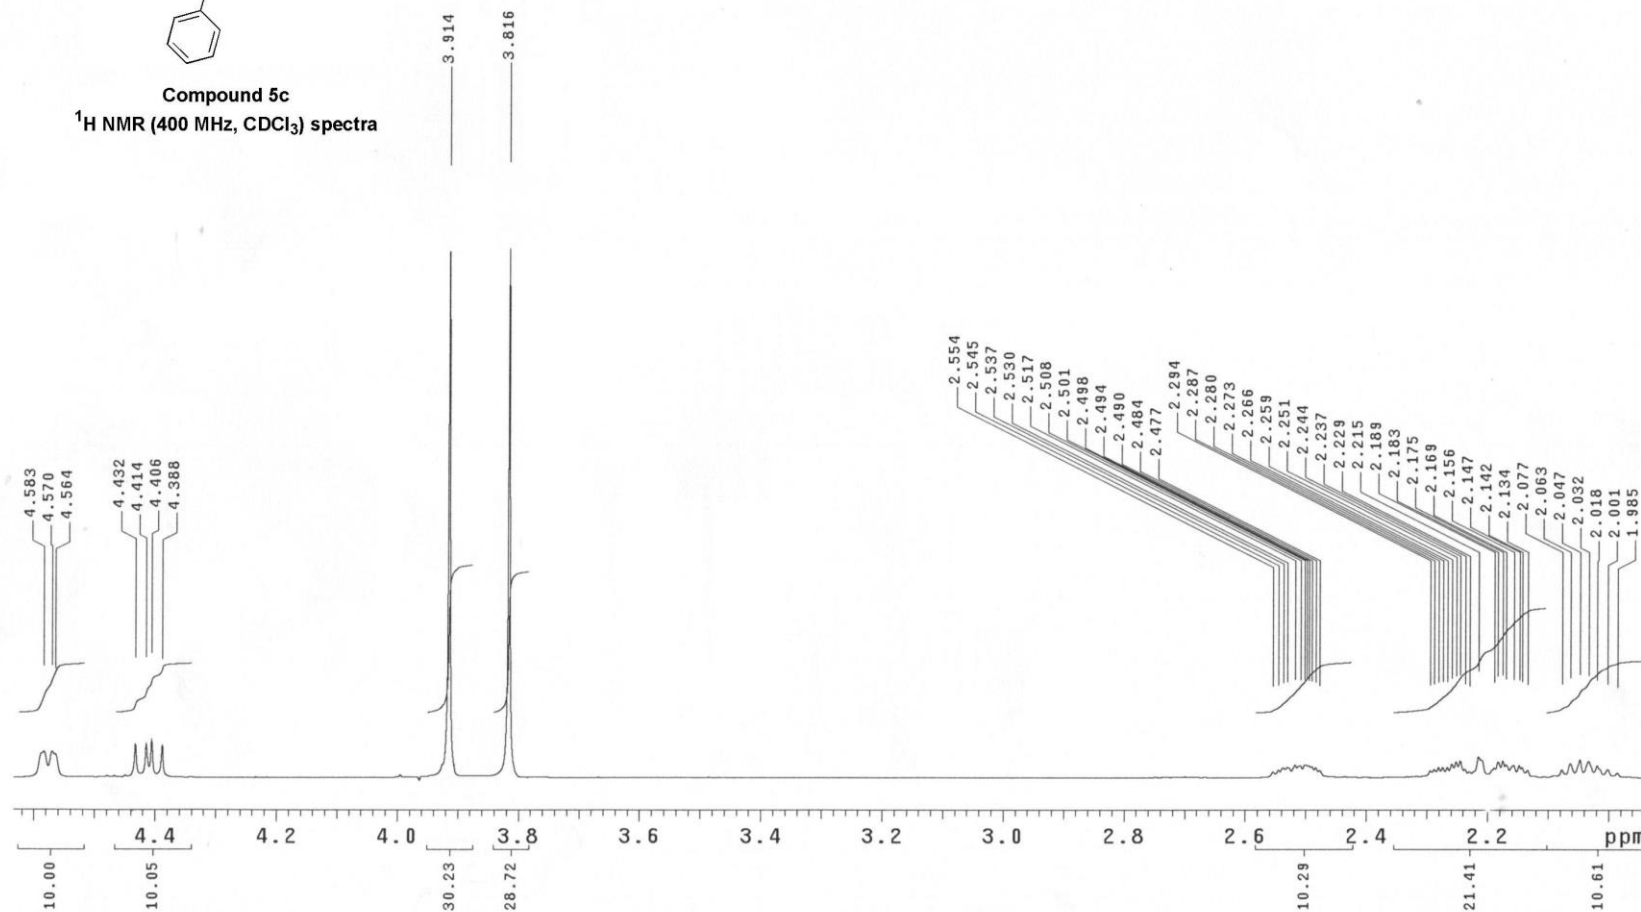

# Compound 5c (<sup>13</sup>C-NMR spectral data)

KS5C

Pulse Sequence: s2pu1

UNITYplus-400 "unity400"

Date: May 4 2020

Solvent: CDCl<sub>3</sub>

Ambient temperature

Total 1088 repetitions

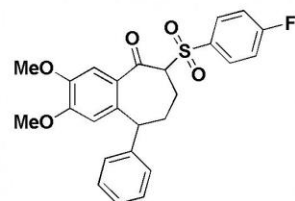

Compound 5c

<sup>13</sup>C NMR (100 MHz, CDCl<sub>3</sub>) spectra

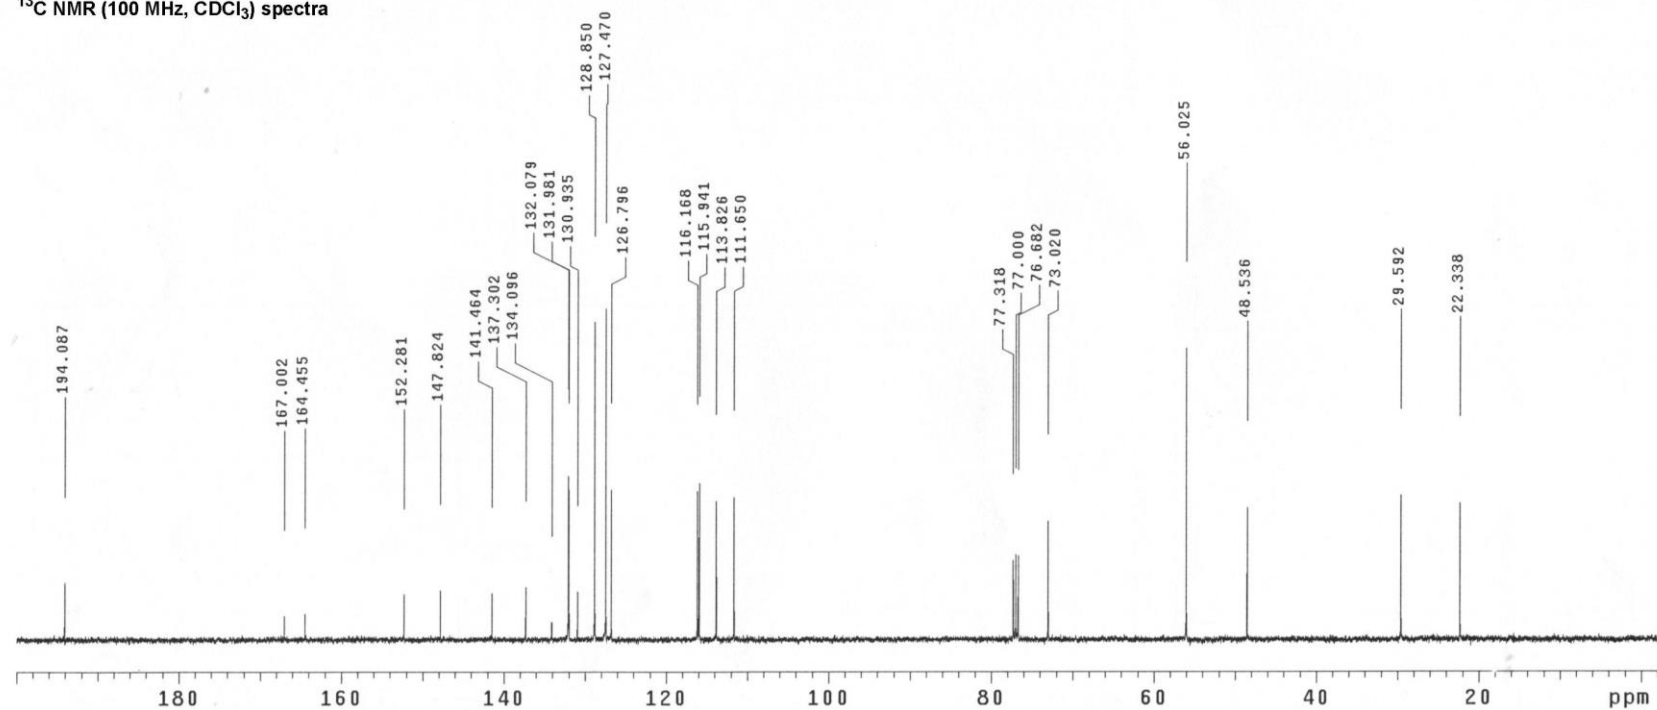

# Compound 5d (<sup>1</sup>H-NMR spectral data-1)

KSOMeCBF

Pulse Sequence: s2pu1

UNITYplus-400 "unity400"

Date: Dec 27 2018

Solvent: CDCl<sub>3</sub>

Ambient temperature

Total 32 repetitions

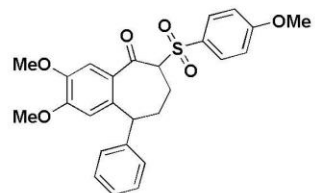

Compound 5d

<sup>1</sup>H NMR (400 MHz, CDCl<sub>3</sub>) spectra

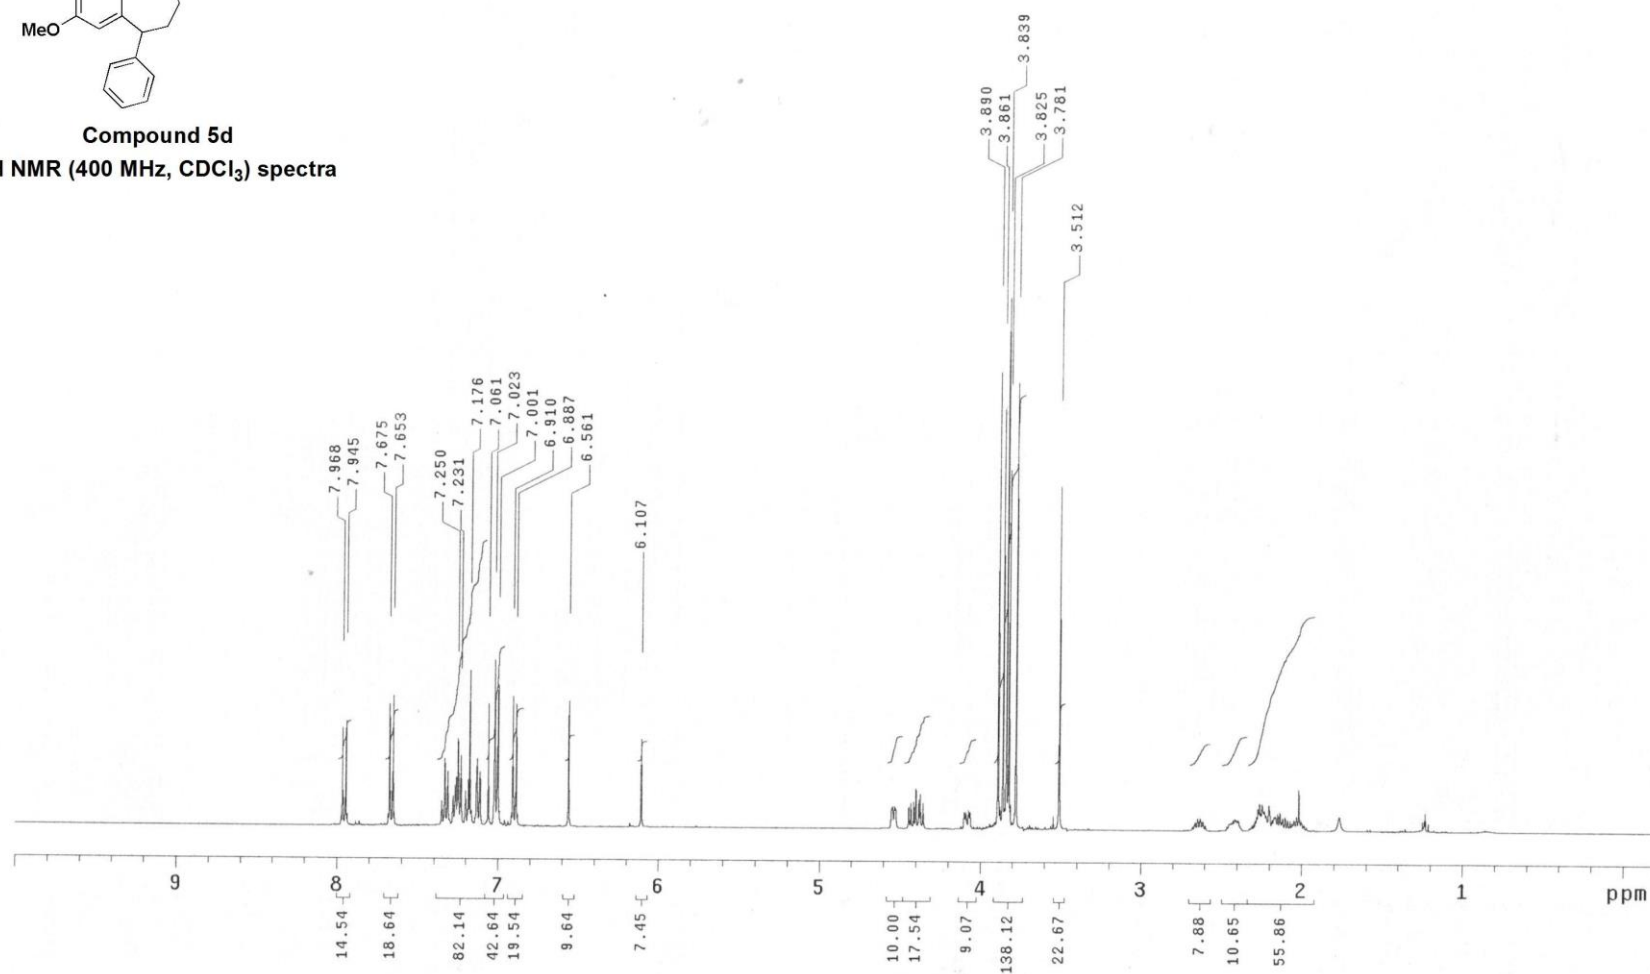

# Compound 5d (<sup>1</sup>H-NMR spectral data-2)

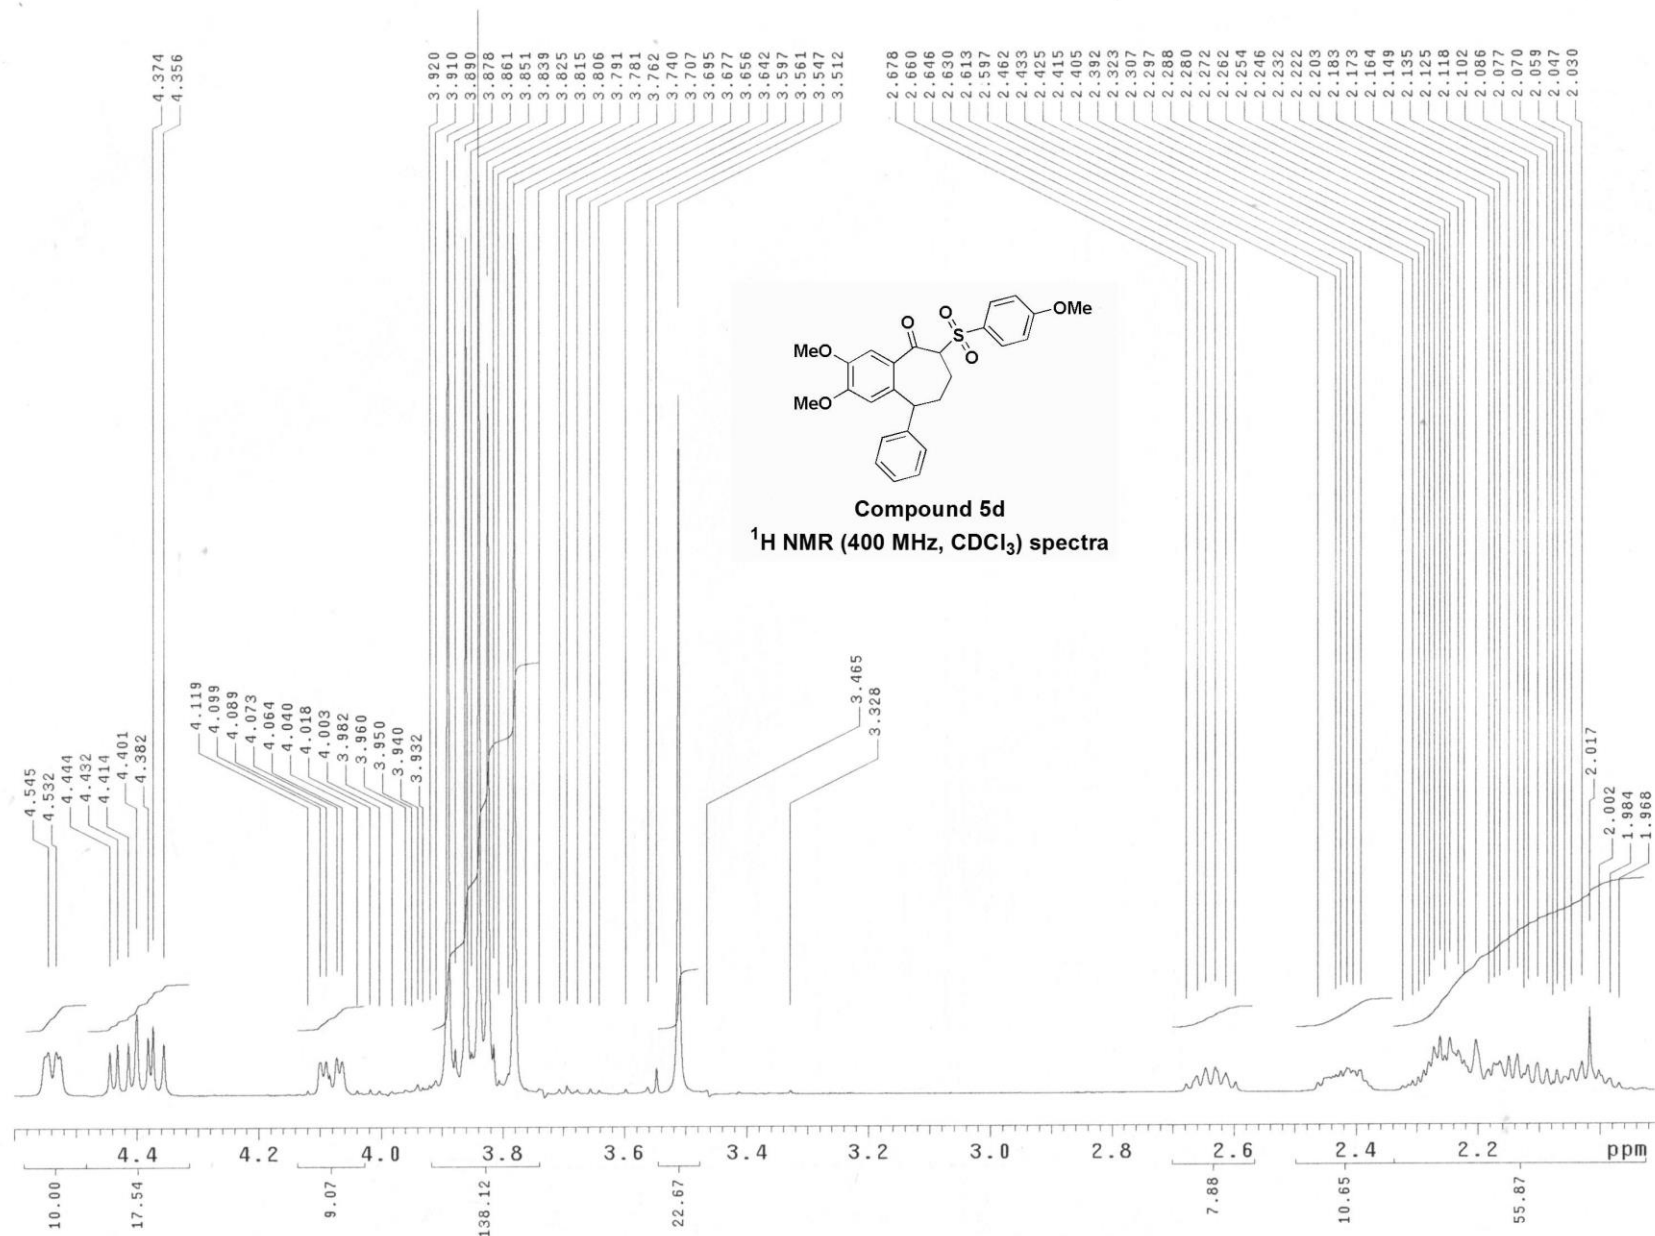

# Compound 5d (<sup>13</sup>C-NMR spectral data)

KSOMeCBF

Pulse Sequence: s2pu1

UNITYplus-400 "unity400"

Date: Dec 27 2018

Solvent: CDCl<sub>3</sub>

Ambient temperature

Total 752 repetitions

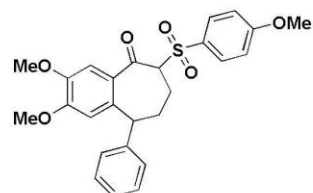

Compound 5d

<sup>13</sup>C NMR (100 MHz, CDCl<sub>3</sub>) spectra

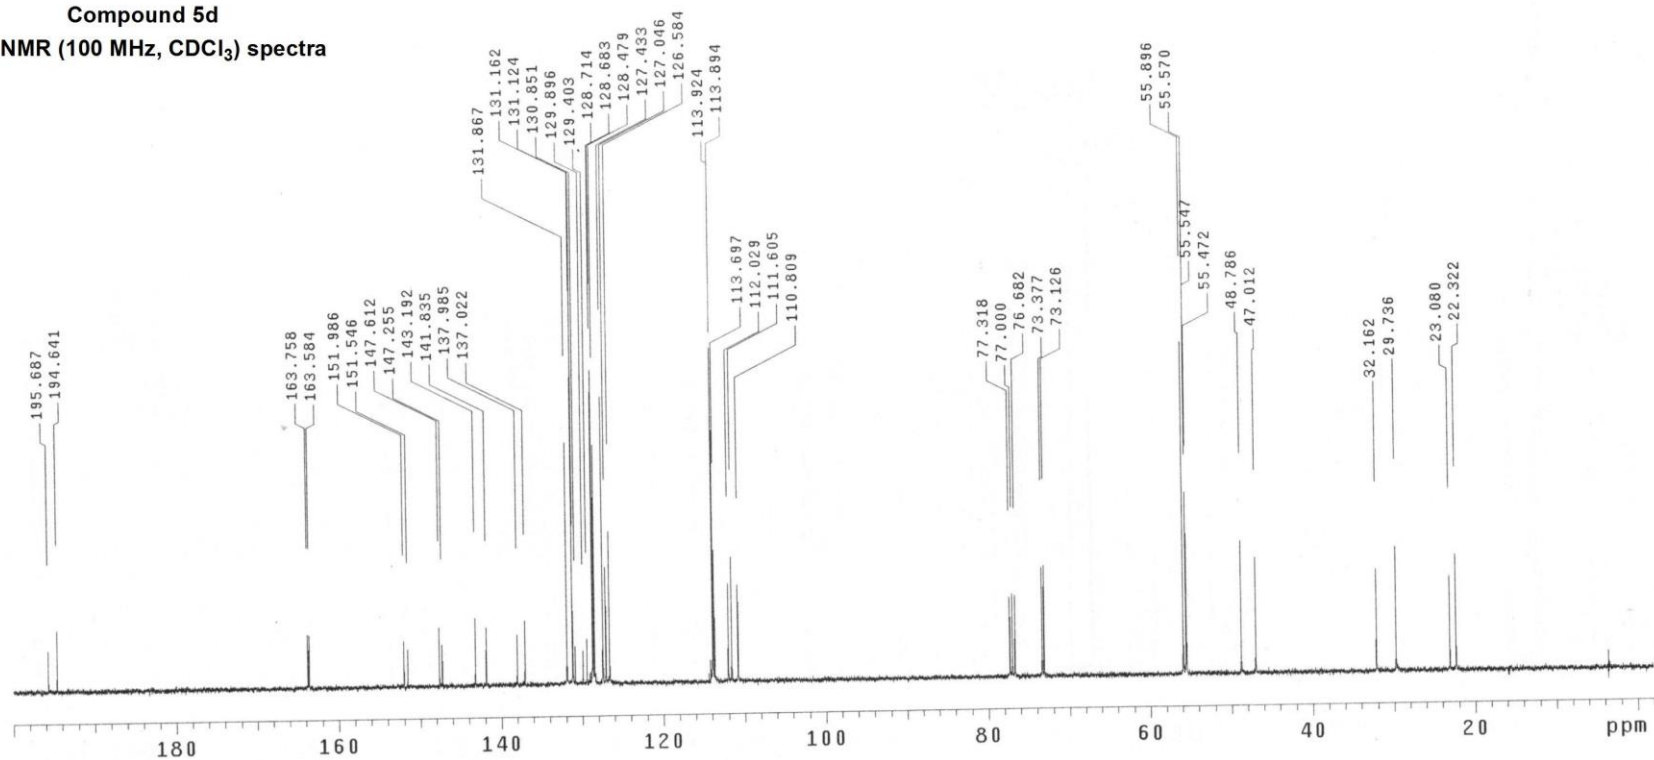

# Compound 5e (<sup>1</sup>H-NMR spectral data-1)

KSPHbuCBF

Pulse Sequence: s2pul

UNITYplus-400 "unity400"

Date: Jan 14 2019

Solvent: CDCl<sub>3</sub>

Ambient temperature

Total 32 repetitions

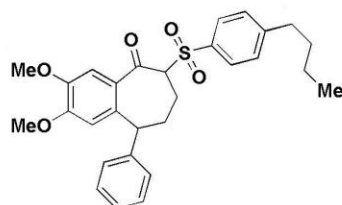

Compound 5e

<sup>1</sup>H NMR (400 MHz, CDCl<sub>3</sub>) spectra

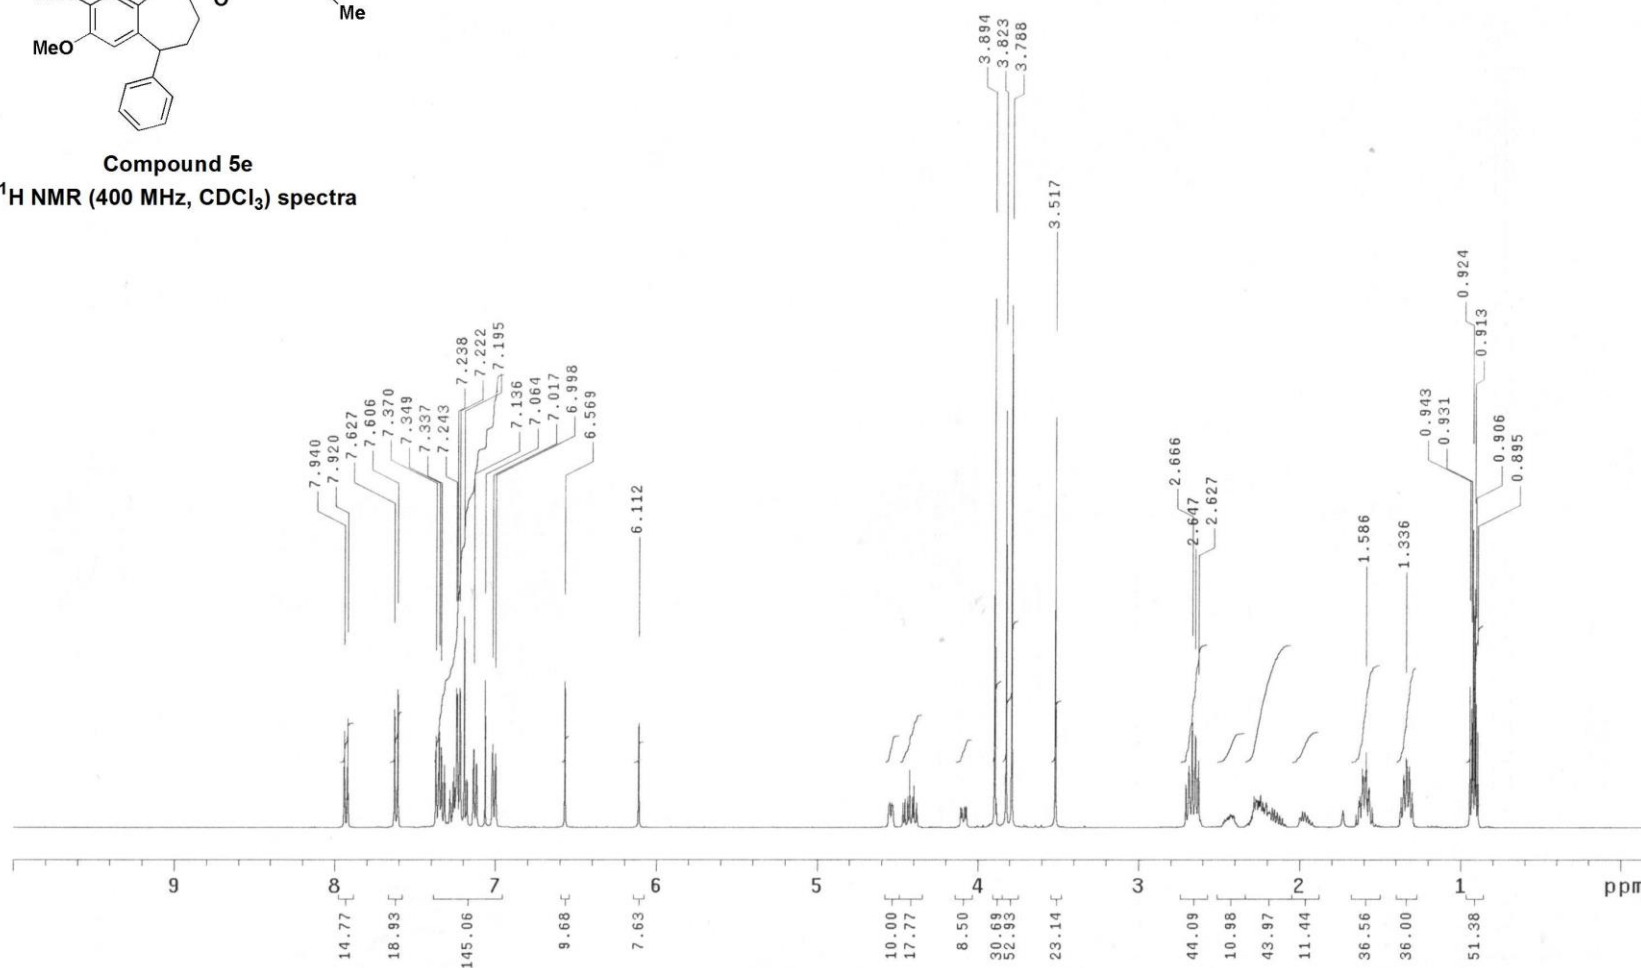

# Compound 5e (<sup>1</sup>H-NMR spectral data-2)

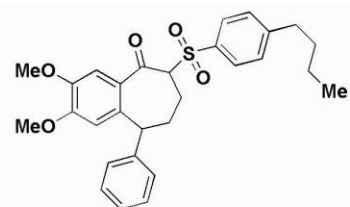

Compound 5e

<sup>1</sup>H NMR (400 MHz, CDCl<sub>3</sub>) spectra

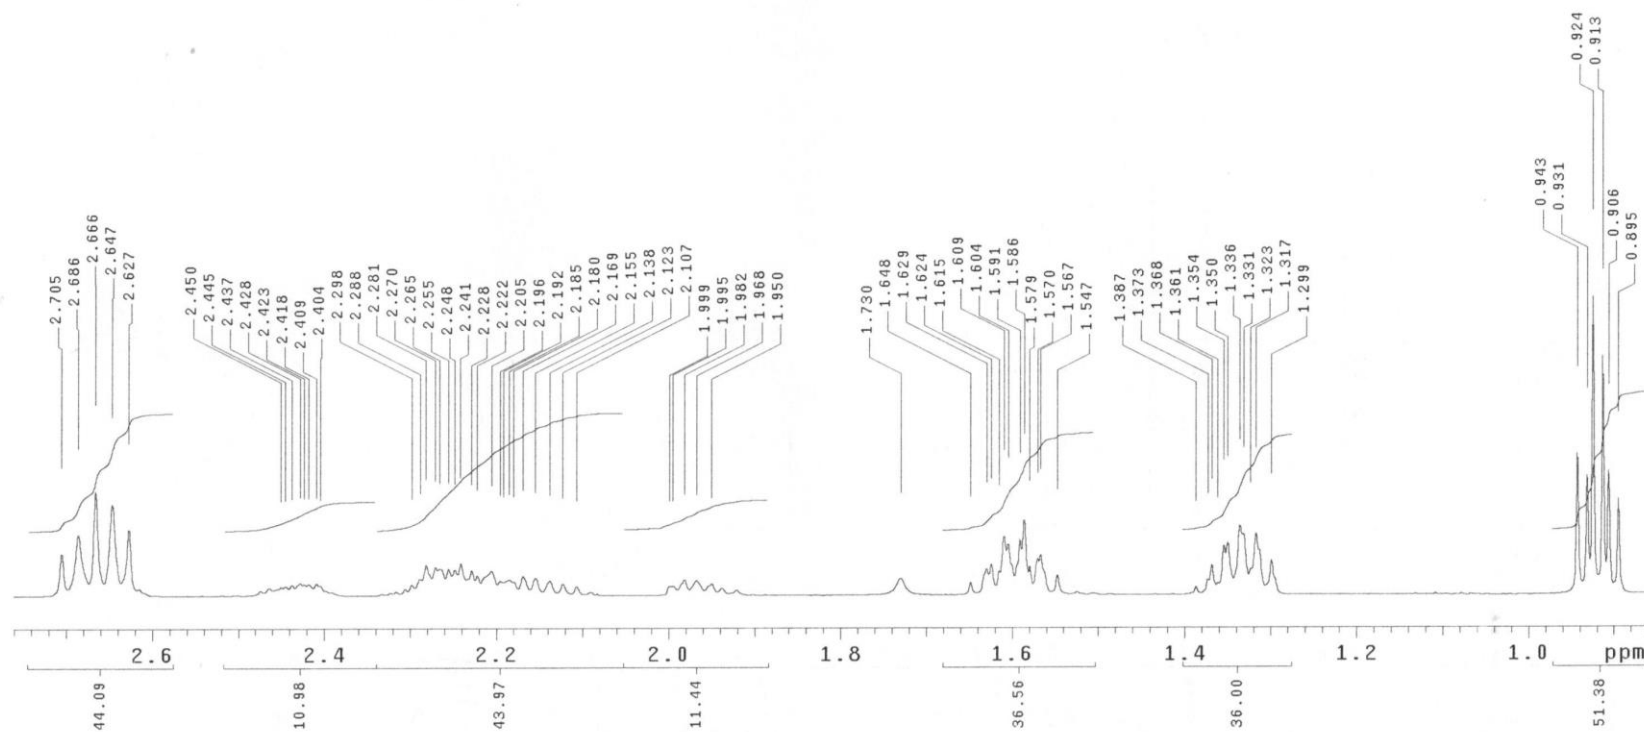

# Compound 5e (<sup>1</sup>H-NMR spectral data-3)

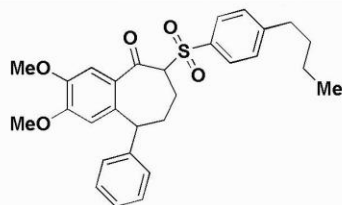

Compound 5e

<sup>1</sup>H NMR (400 MHz, CDCl<sub>3</sub>) spectra

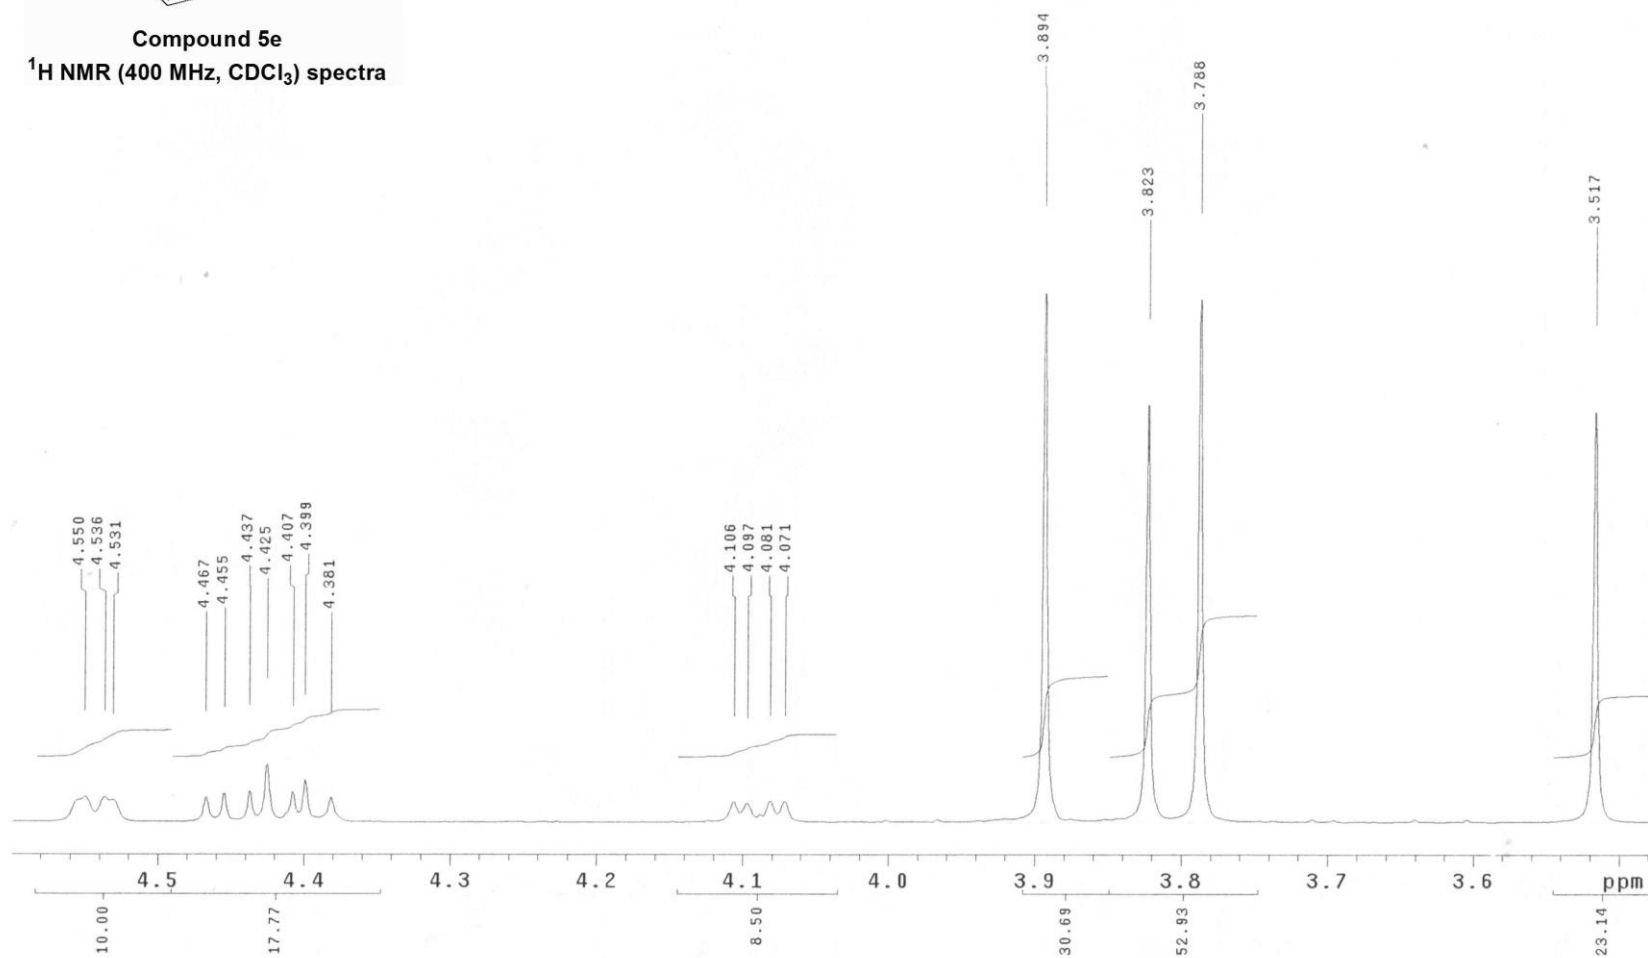

# Compound 5e (<sup>13</sup>C-NMR spectral data)

KSPbBuCBF

Pulse Sequence: s2pu1

UNITYplus-400 "unity400"

Date: Jan 14 2019

Solvent: CDCl<sub>3</sub>

Ambient temperature

Total 672 repetitions

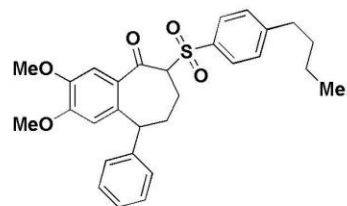

Compound 5e

<sup>13</sup>C NMR (100 MHz, CDCl<sub>3</sub>) spectra

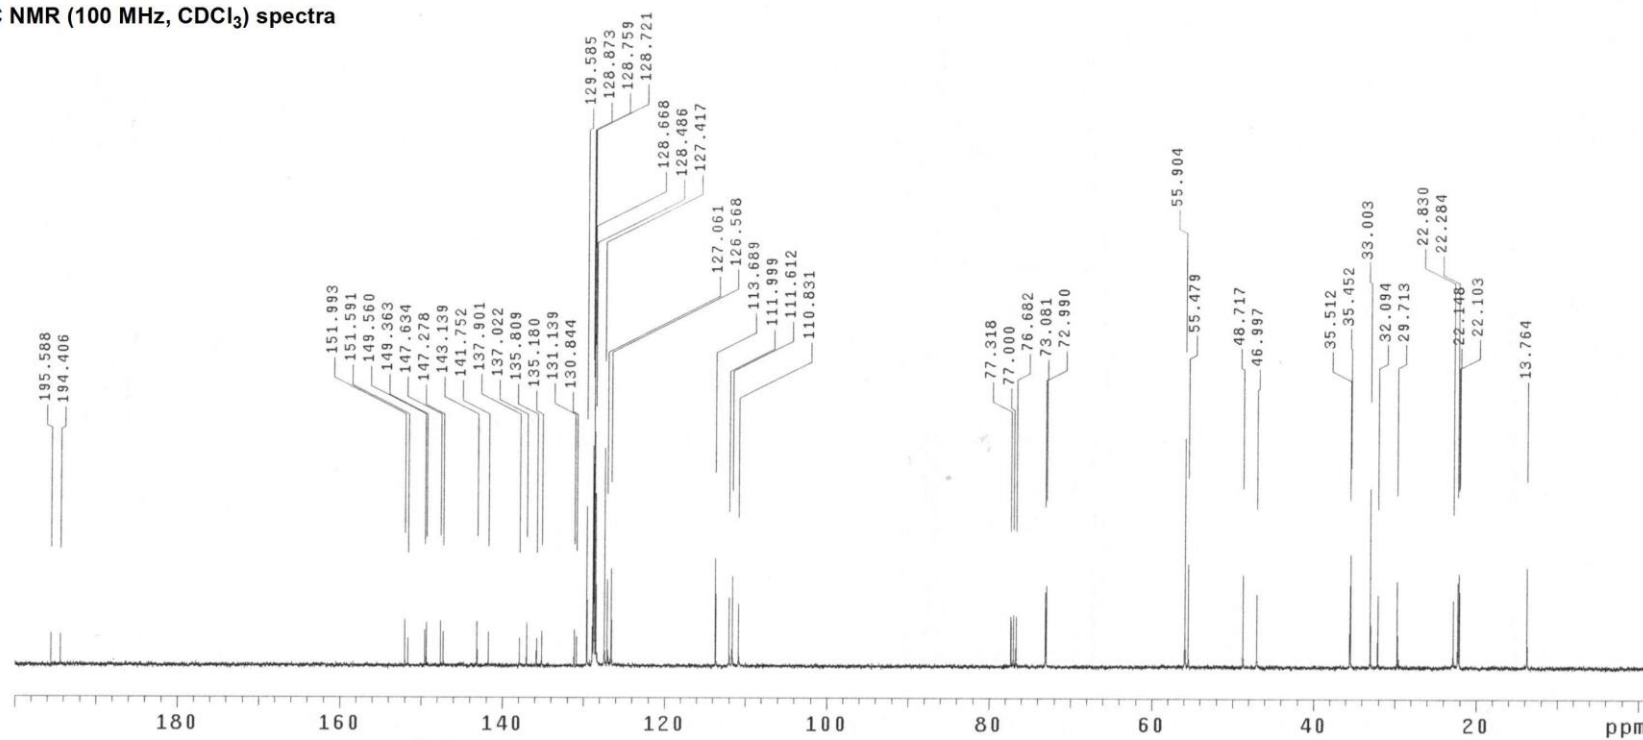

# Compound 5f (<sup>1</sup>H-NMR spectral data-1)

KSMSCBF

Pulse Sequence: s2pu1

UNITYplus-400 "unity400"

Date: Dec 17 2018

Solvent: CDCl<sub>3</sub>

Ambient temperature

Total 32 repetitions

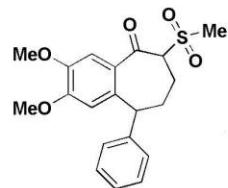

Compound 5f

<sup>1</sup>H NMR (400 MHz, CDCl<sub>3</sub>) spectra

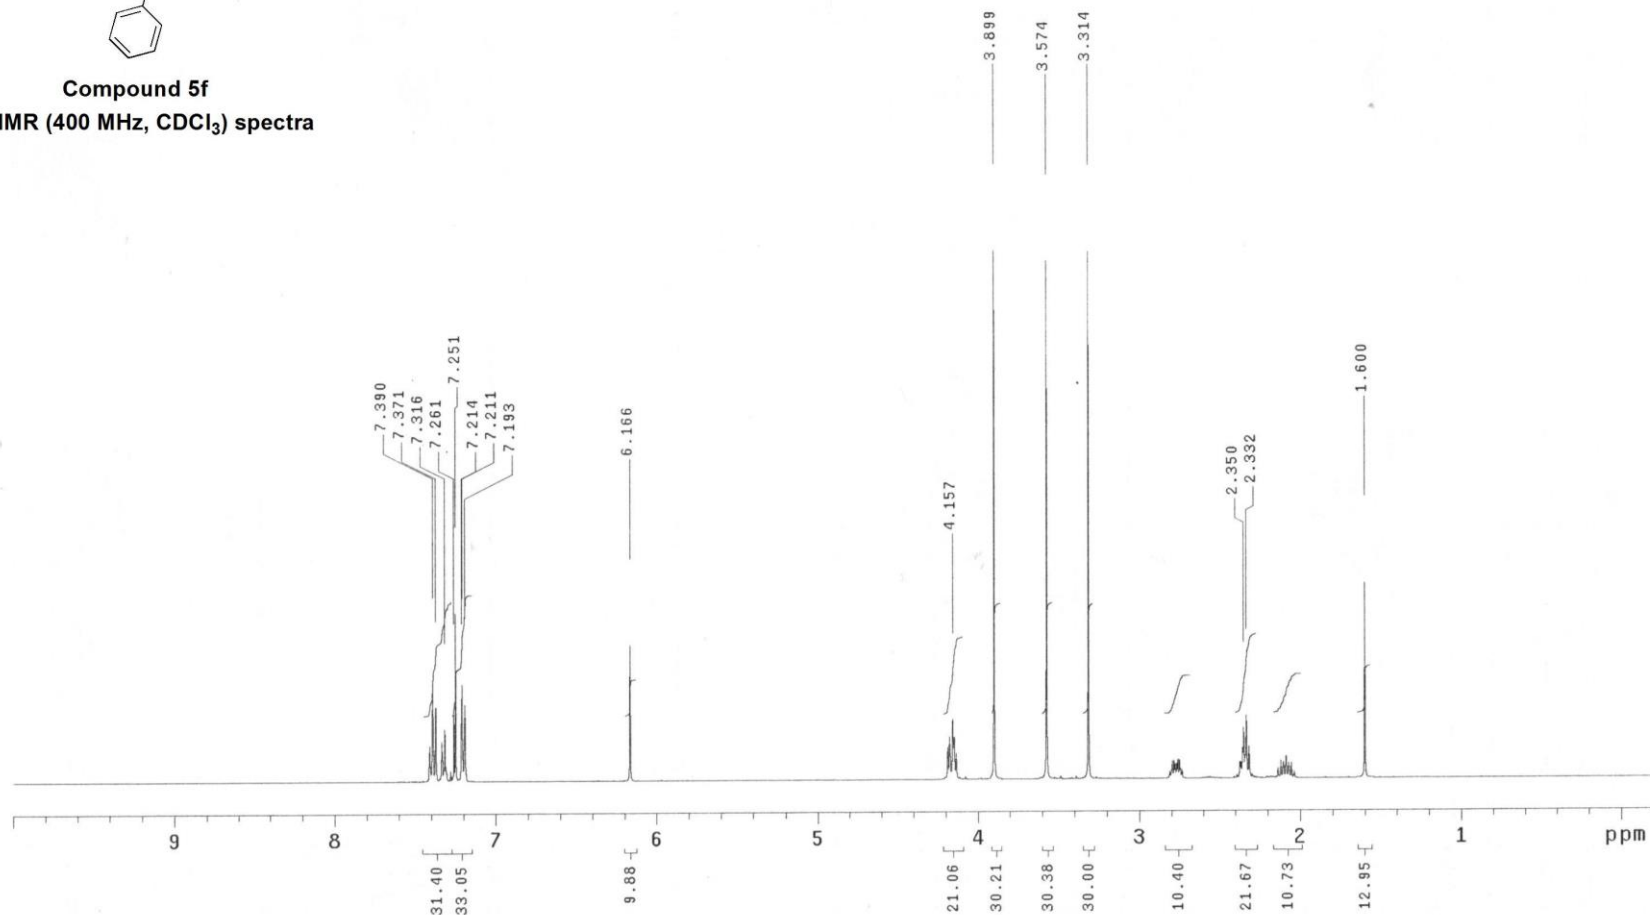

# Compound 5f (<sup>1</sup>H-NMR spectral data-2)

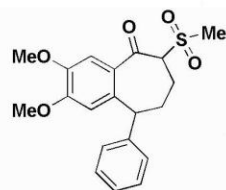

Compound 5f

<sup>1</sup>H NMR (400 MHz, CDCl<sub>3</sub>) spectra

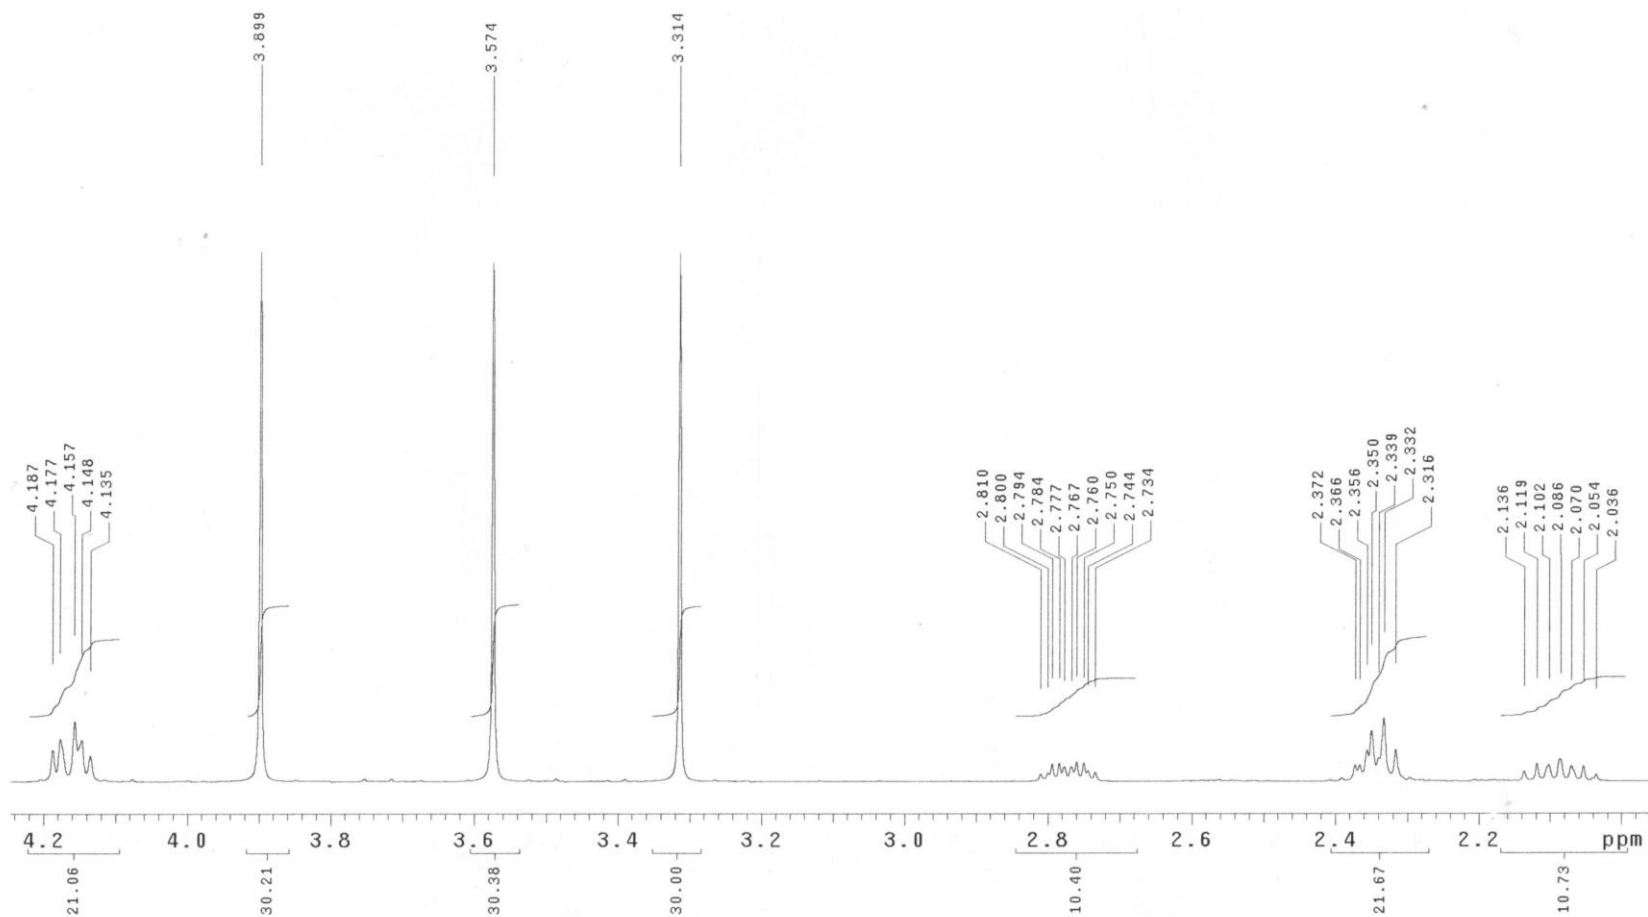

# Compound 5f (<sup>13</sup>C-NMR spectral data)

KSMSCBF

Pulse Sequence: s2pu1

UNITYplus-400 "unity400"

Date: Dec 17 2018

Solvent: CDCl<sub>3</sub>

Ambient temperature

Total 2464 repetitions

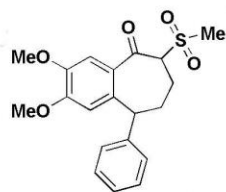

Compound 5f

<sup>13</sup>C NMR (100 MHz, CDCl<sub>3</sub>) spectra

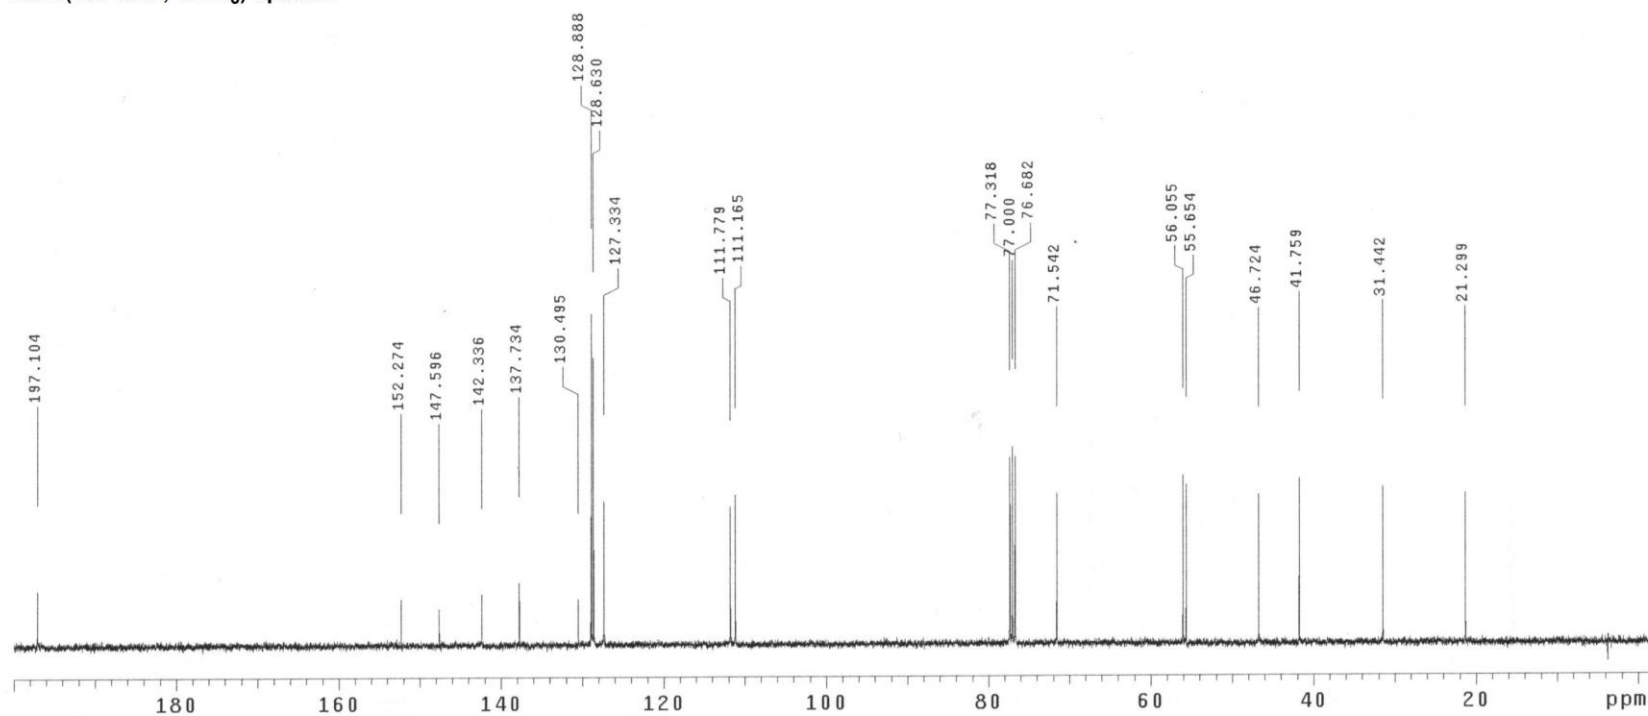

# Compound 5g (<sup>1</sup>H-NMR spectral data-1)

KSBuCBF

Pulse Sequence: s2pu1

UNITYplus-400 "unity400"

Date: Dec 21 2018

Solvent: CDCl<sub>3</sub>

Ambient temperature

Total 32 repetitions

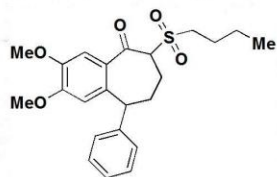

Compound 5g

<sup>1</sup>H NMR (400 MHz, CDCl<sub>3</sub>) spectra

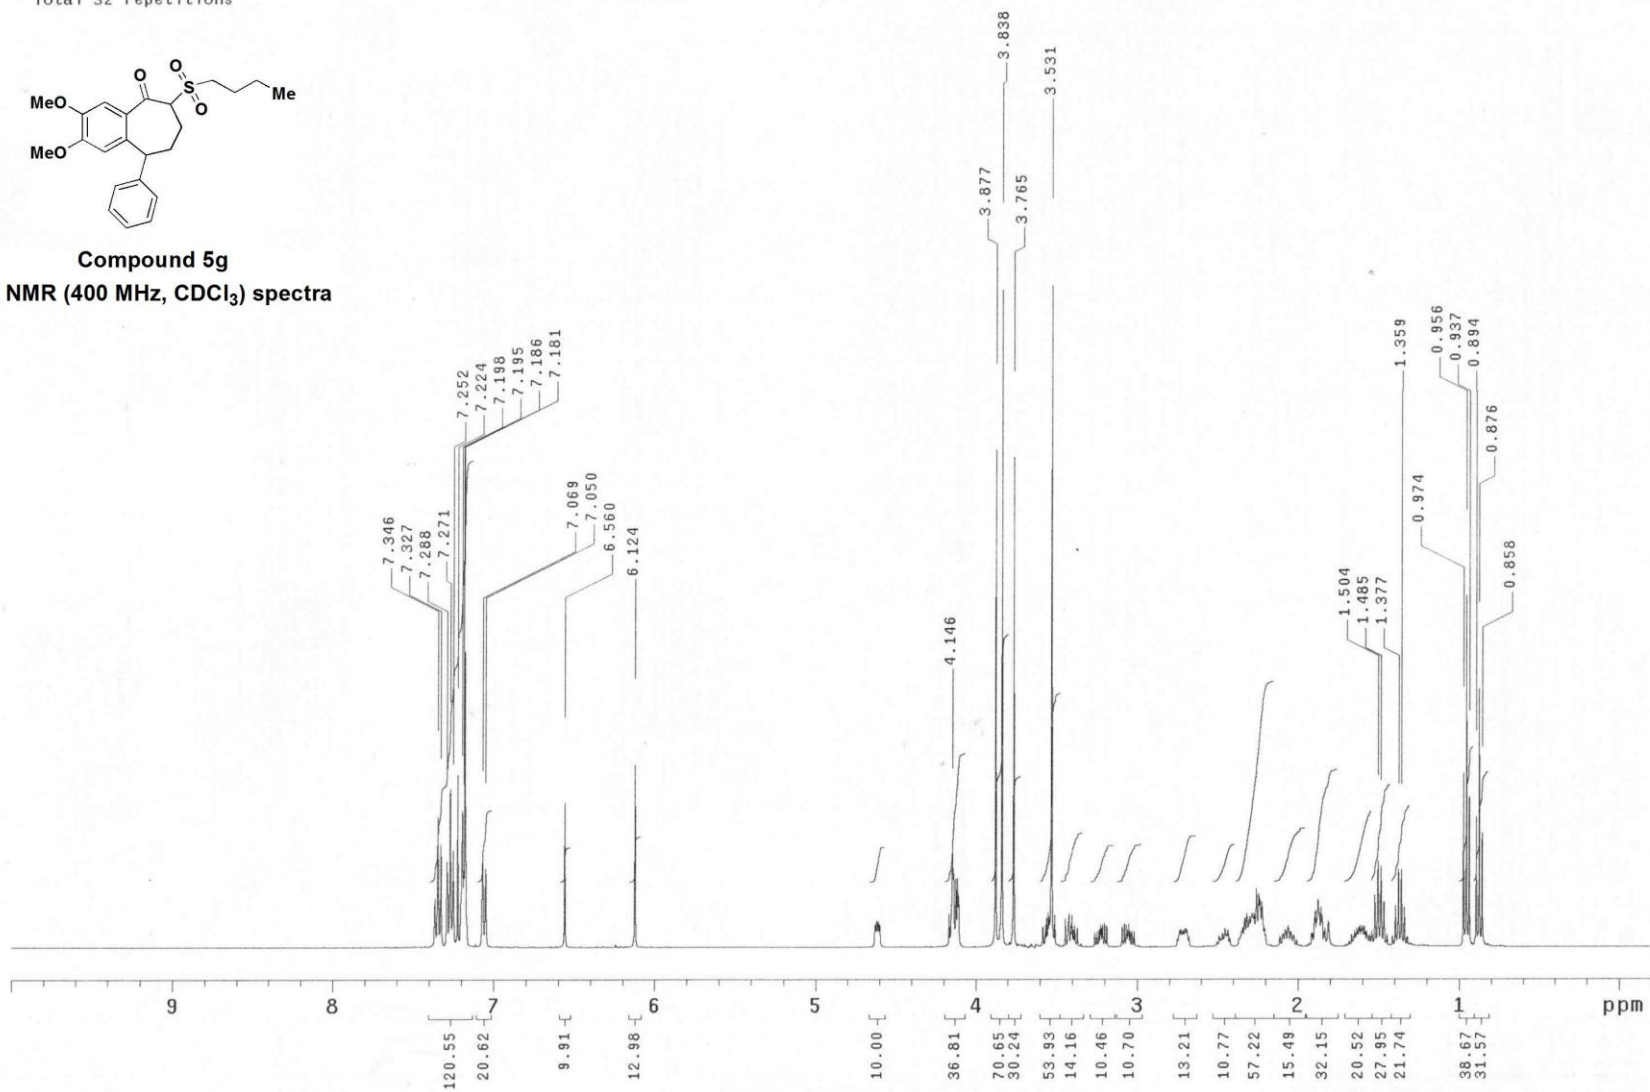

# Compound 5g (<sup>1</sup>H-NMR spectral data-2)

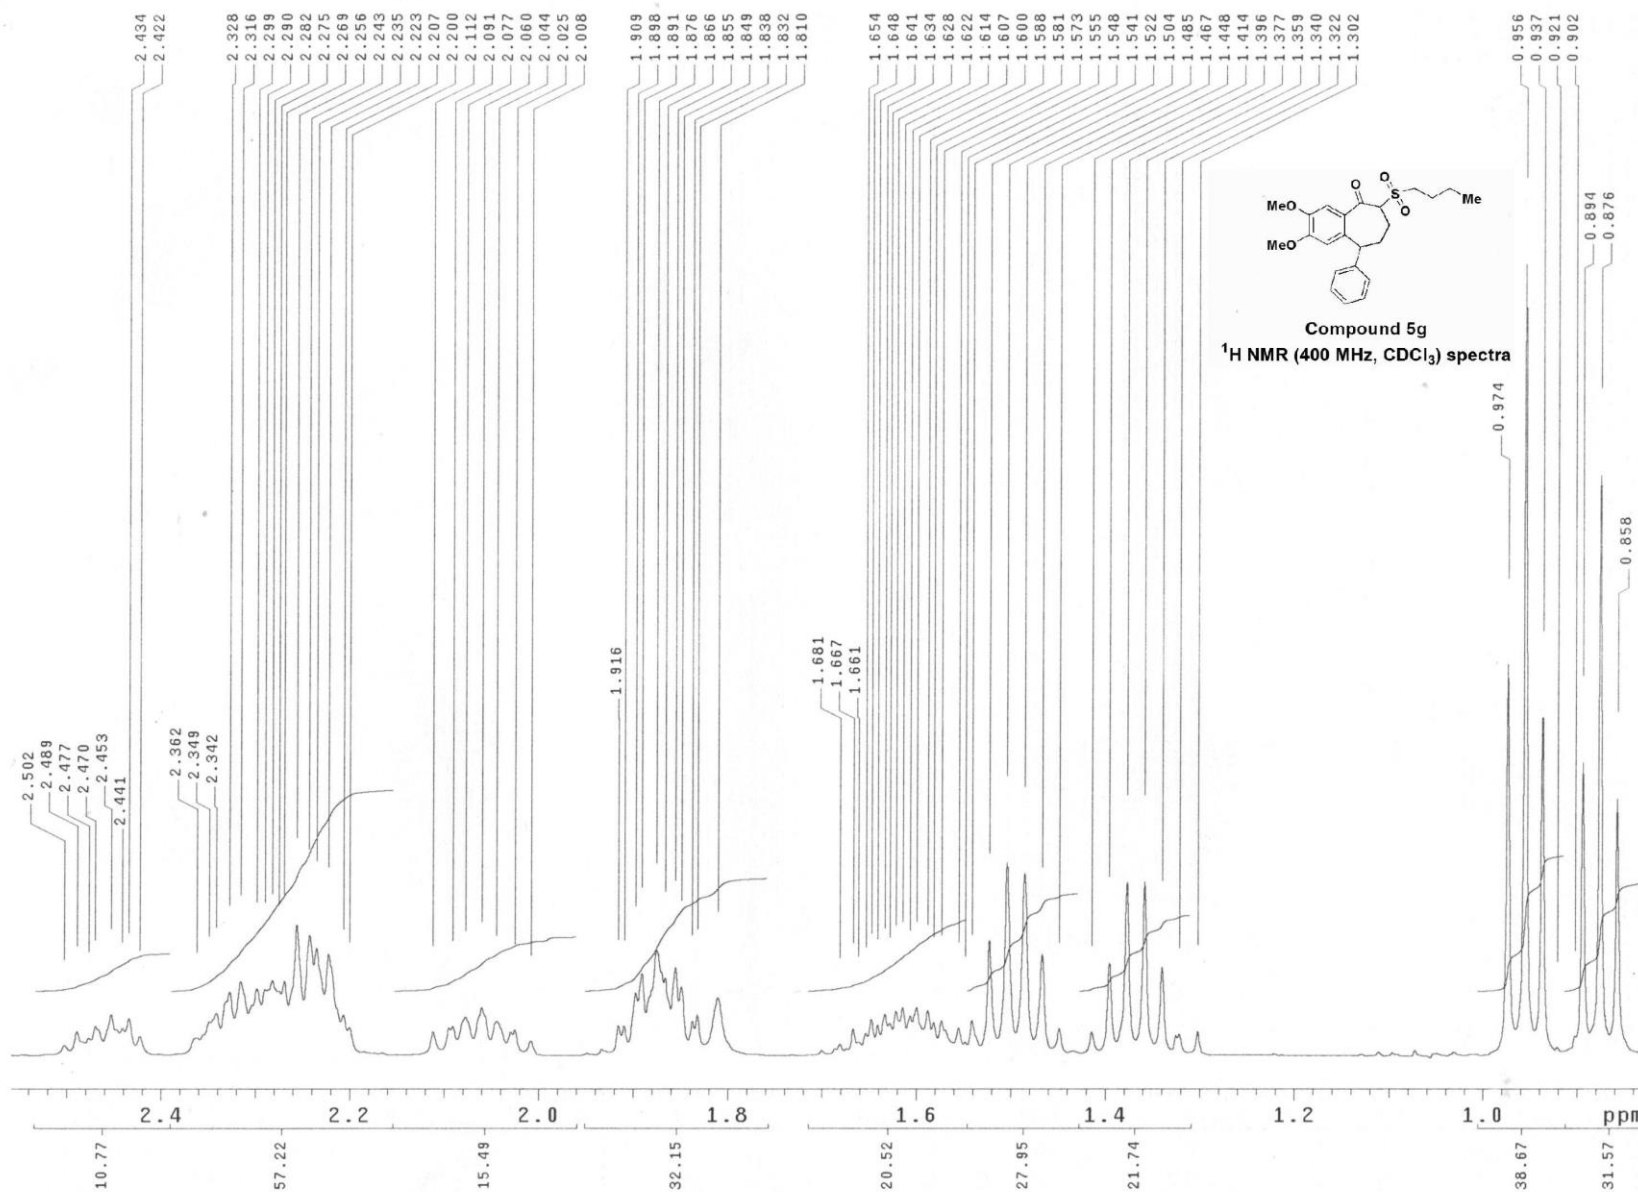

# Compound 5g (<sup>1</sup>H-NMR spectral data-3)

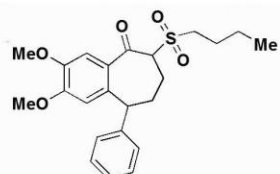

Compound 5g

<sup>1</sup>H NMR (400 MHz, CDCl<sub>3</sub>) spectra

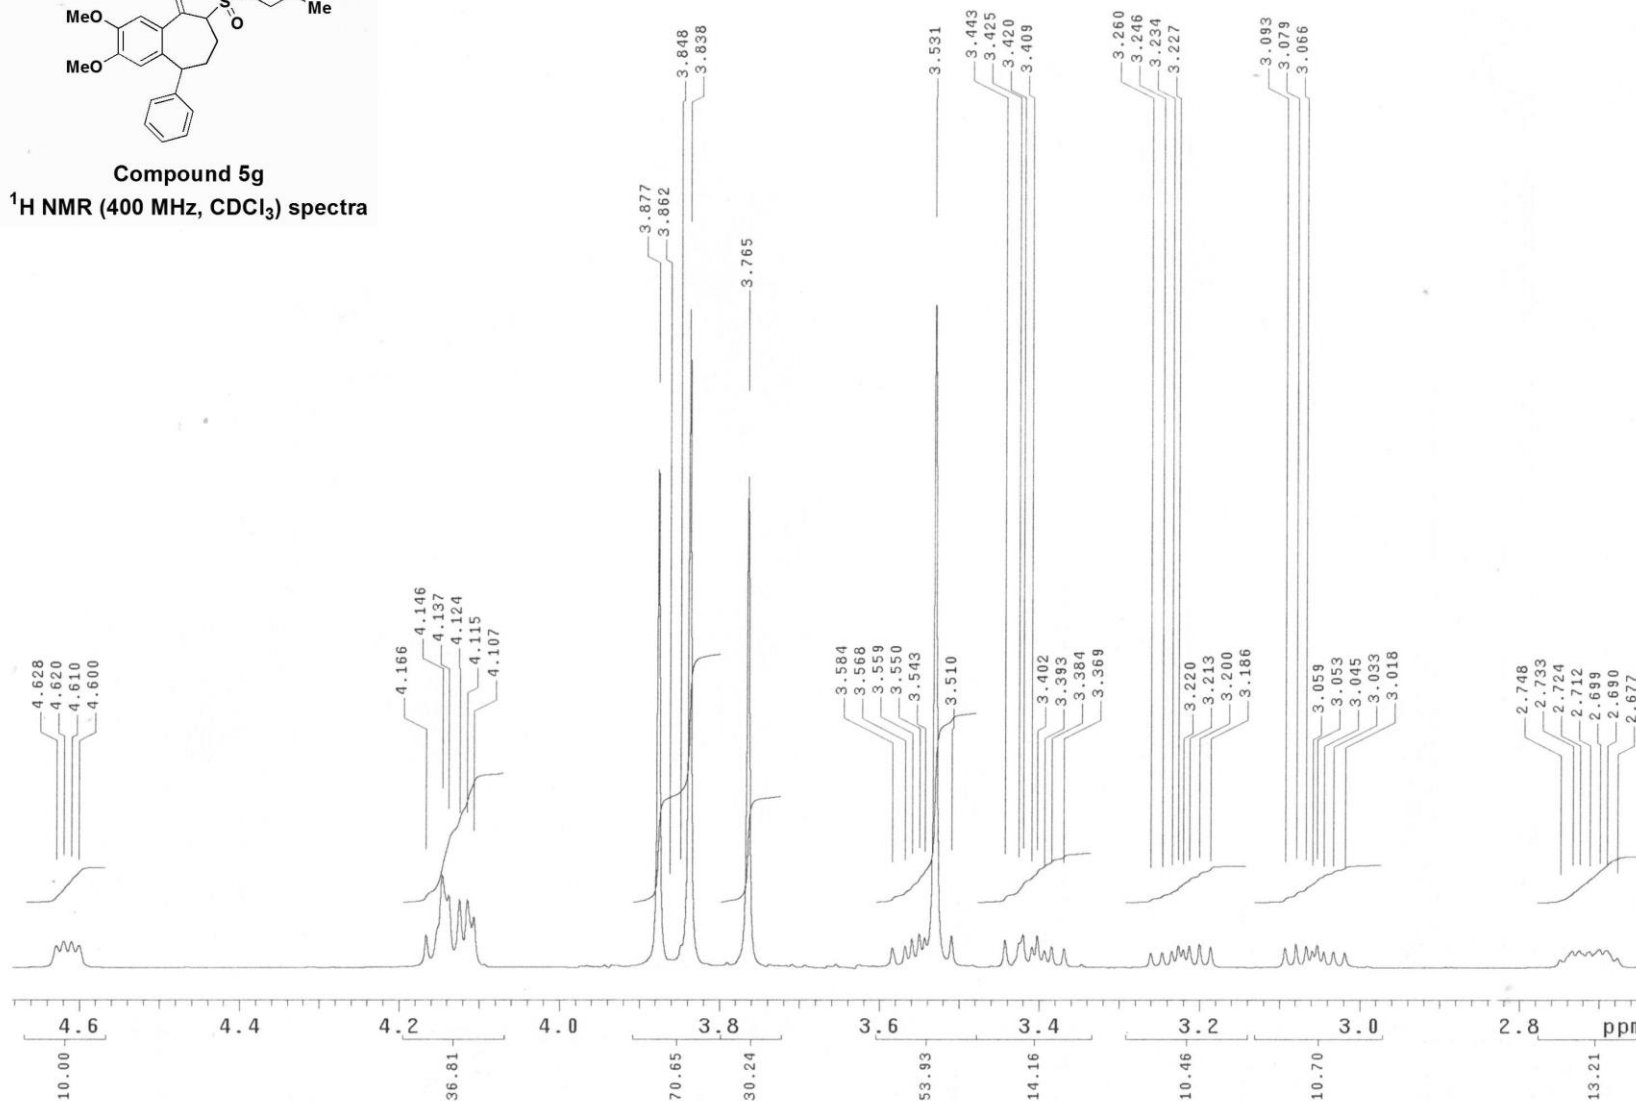

# Compound 5g (<sup>13</sup>C-NMR spectral data)

KSBUcBF

Pulse Sequence: s2pu1

UNITYplus-400 "unity400"

Date: Dec 21 2018

Solvent: CDCl<sub>3</sub>

Ambient temperature

Total 1392 repetitions

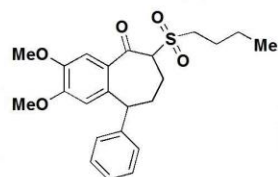

Compound 5g

<sup>13</sup>C NMR (100 MHz, CDCl<sub>3</sub>) spectra

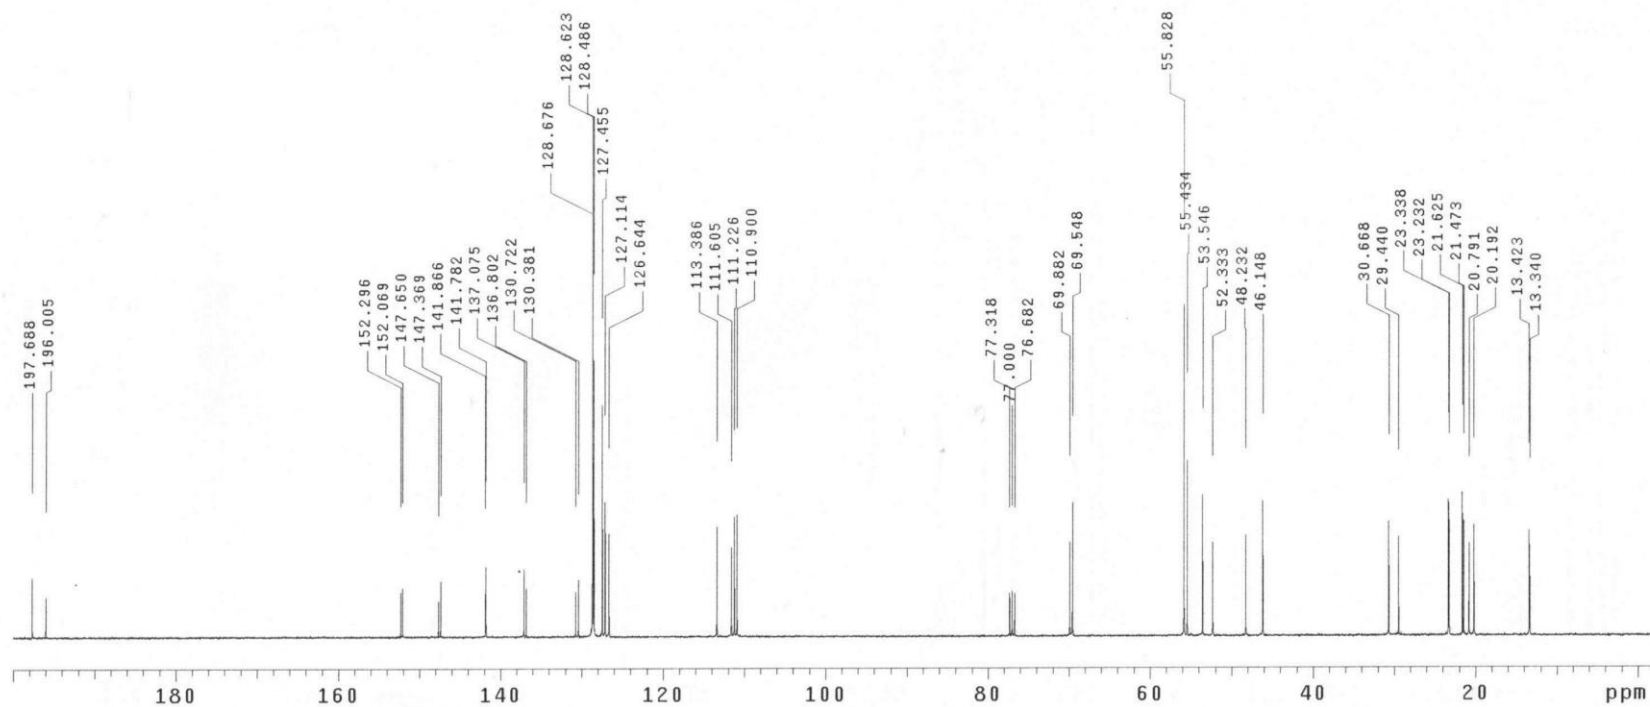

# Compound 5h (<sup>1</sup>H-NMR spectral data-1)

KSE1CBF

Pulse Sequence: s2pu1

UNITYplus-400 "unity400"

Date: Jan 16 2019

Solvent: CDCl<sub>3</sub>

Ambient temperature

Total 64 repetitions

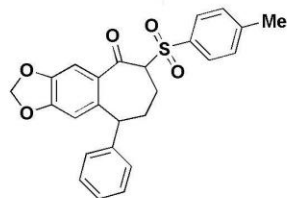

Compound 5h

<sup>1</sup>H NMR (400 MHz, CDCl<sub>3</sub>) spectra

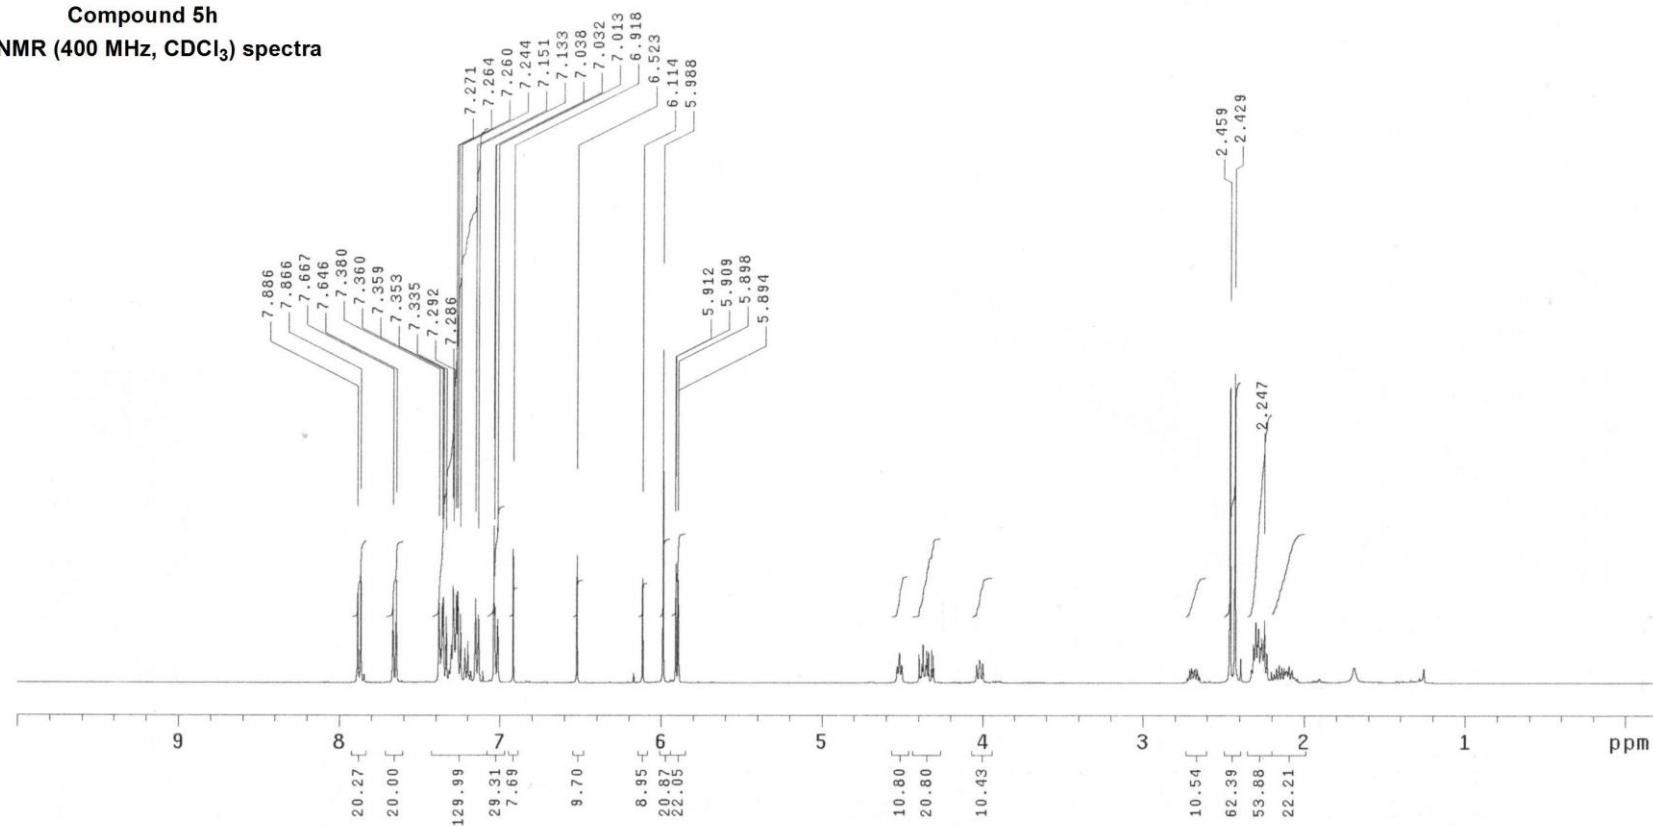

# Compound 5h (<sup>1</sup>H-NMR spectral data-2)

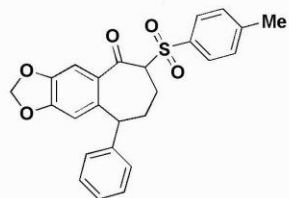

Compound 5h

<sup>1</sup>H NMR (400 MHz, CDCl<sub>3</sub>) spectra

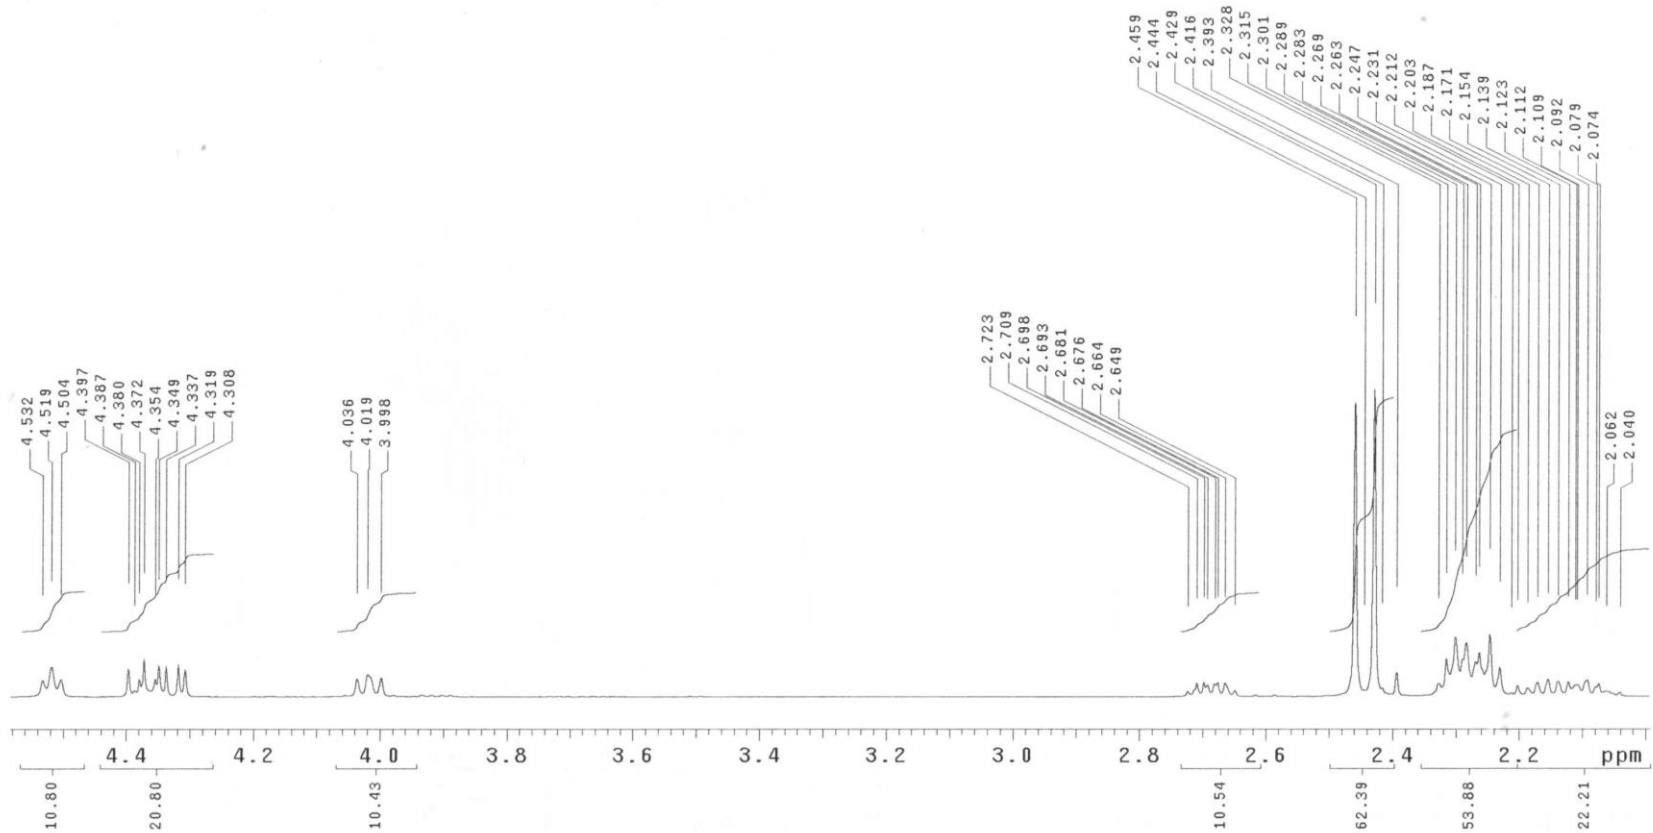

# Compound 5h (<sup>13</sup>C-NMR spectral data)

KSE1CBF

Pulse Sequence: s2pu1

UNITYplus-400 "unity400"

Date: Jan 16 2019

Solvent: CDCl<sub>3</sub>

Ambient temperature

Total 4096 repetitions

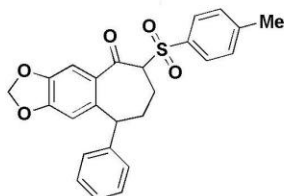

Compound 5h

<sup>13</sup>C NMR (100 MHz, CDCl<sub>3</sub>) spectra

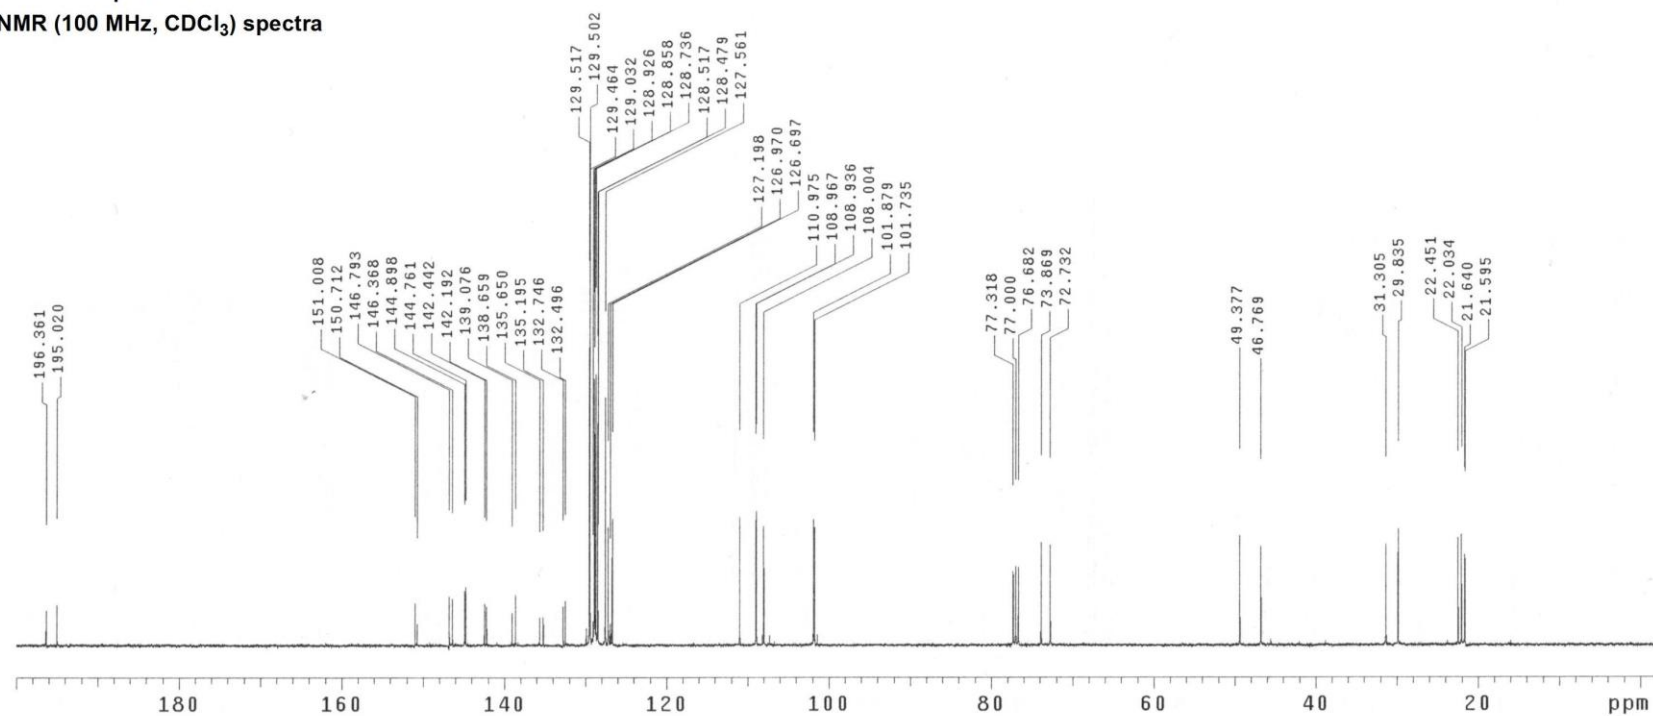

# Compound 5i (<sup>1</sup>H-NMR spectral data-1)

KSE8CBF

Pulse Sequence: s2pu1

UNITYplus-400 "unity400"

Date: Jan 29 2019

Solvent: CDCl<sub>3</sub>

Ambient temperature

Total 32 repetitions

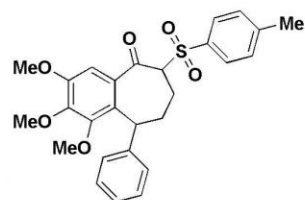

Compound 5i

<sup>1</sup>H NMR (400 MHz, CDCl<sub>3</sub>) spectra

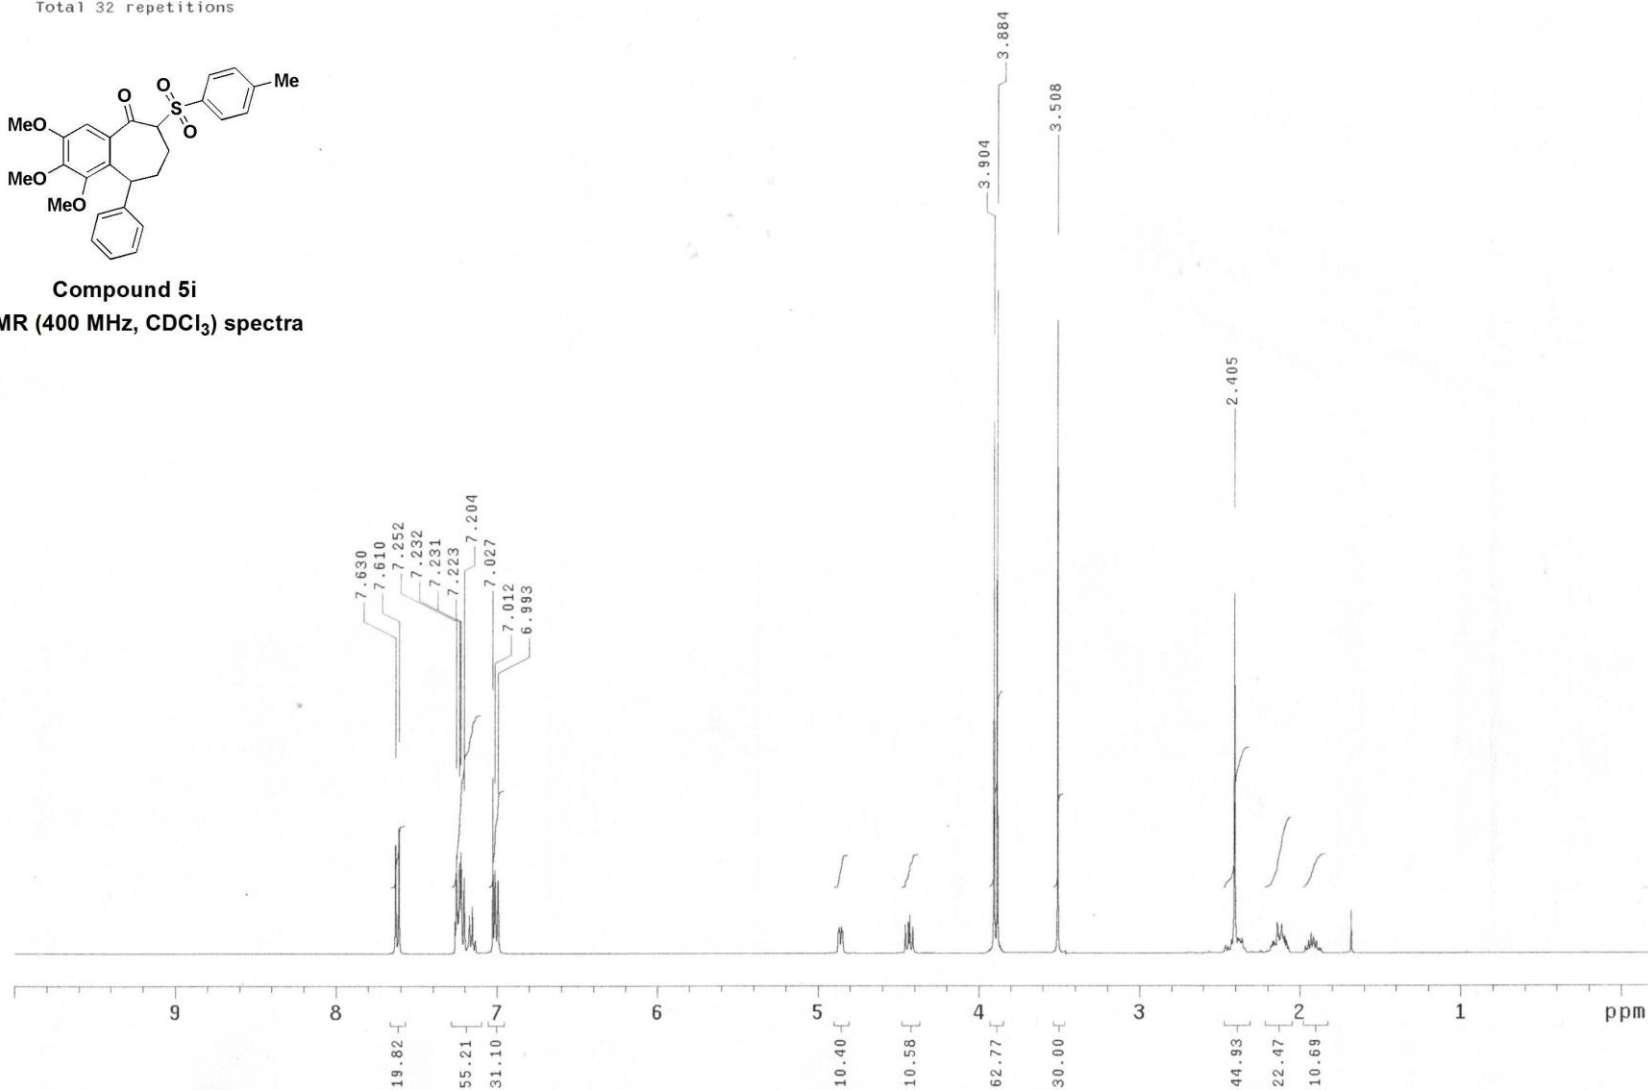

# Compound 5i (<sup>1</sup>H-NMR spectral data-2)

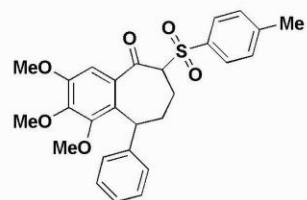

**Compound 5i**  
**<sup>1</sup>H NMR (400 MHz, CDCl<sub>3</sub>) spectra**

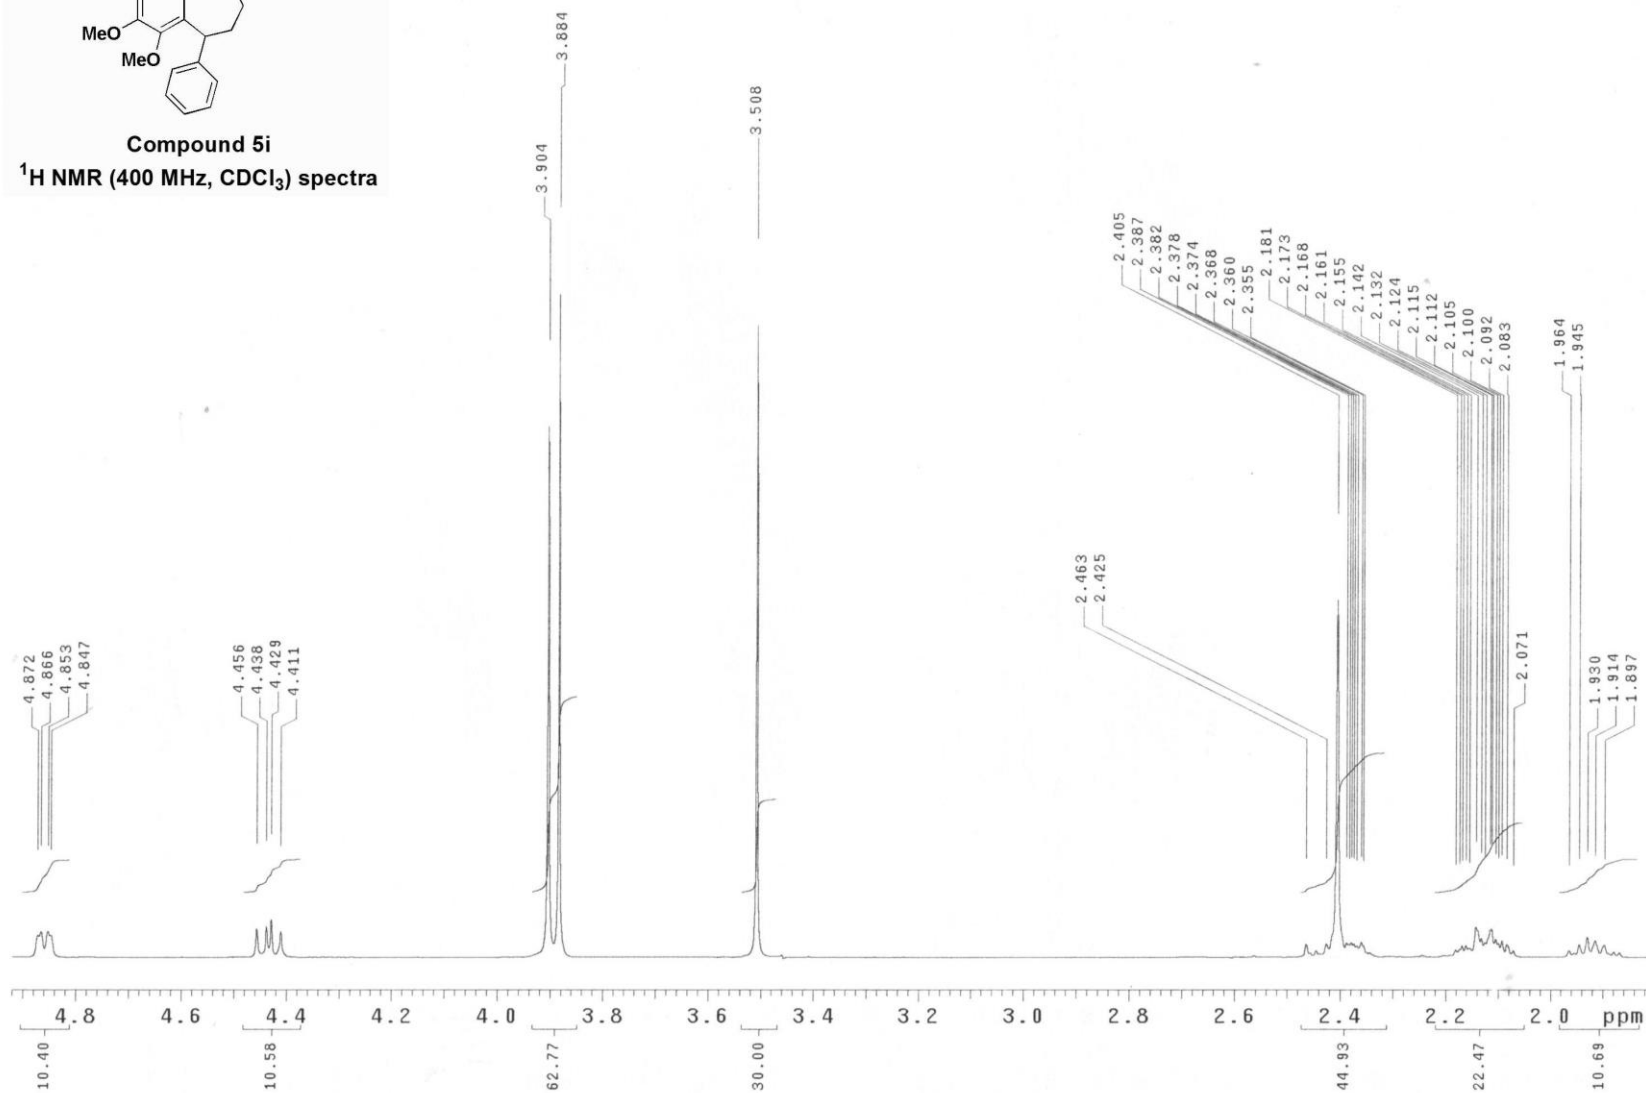

# Compound 5i (<sup>13</sup>C-NMR spectral data)

KSE8CBF

Pulse Sequence: s2pu1

UNITYplus-400 "unity400"

Date: Jan 29 2019

Solvent: CDCl<sub>3</sub>

Ambient temperature

Total 480 repetitions

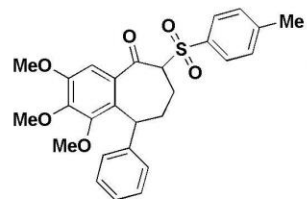

Compound 5i

<sup>13</sup>C NMR (100 MHz, CDCl<sub>3</sub>) spectra

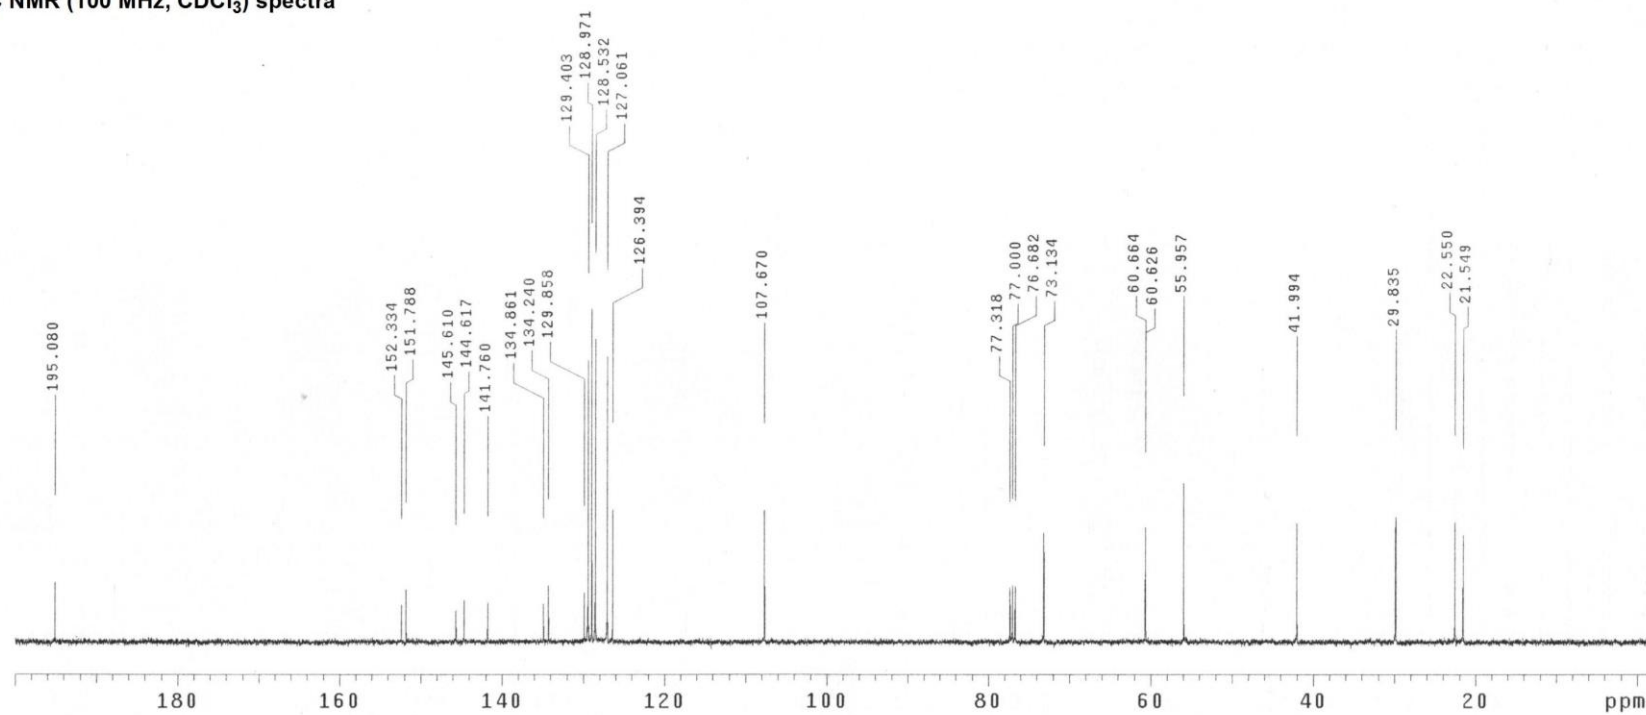

# Compound 5j (<sup>1</sup>H-NMR spectral data-1)

KS30BSCBF

Pulse Sequence: s2pul

UNITYplus-400 "unity400"

Date: Feb 19 2019

Solvent: CDCl<sub>3</sub>

Ambient temperature

Total 72 repetitions

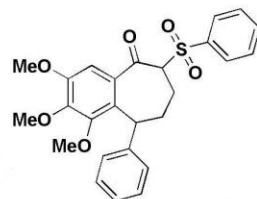

Compound 5j

<sup>1</sup>H NMR (400 MHz, CDCl<sub>3</sub>) spectra

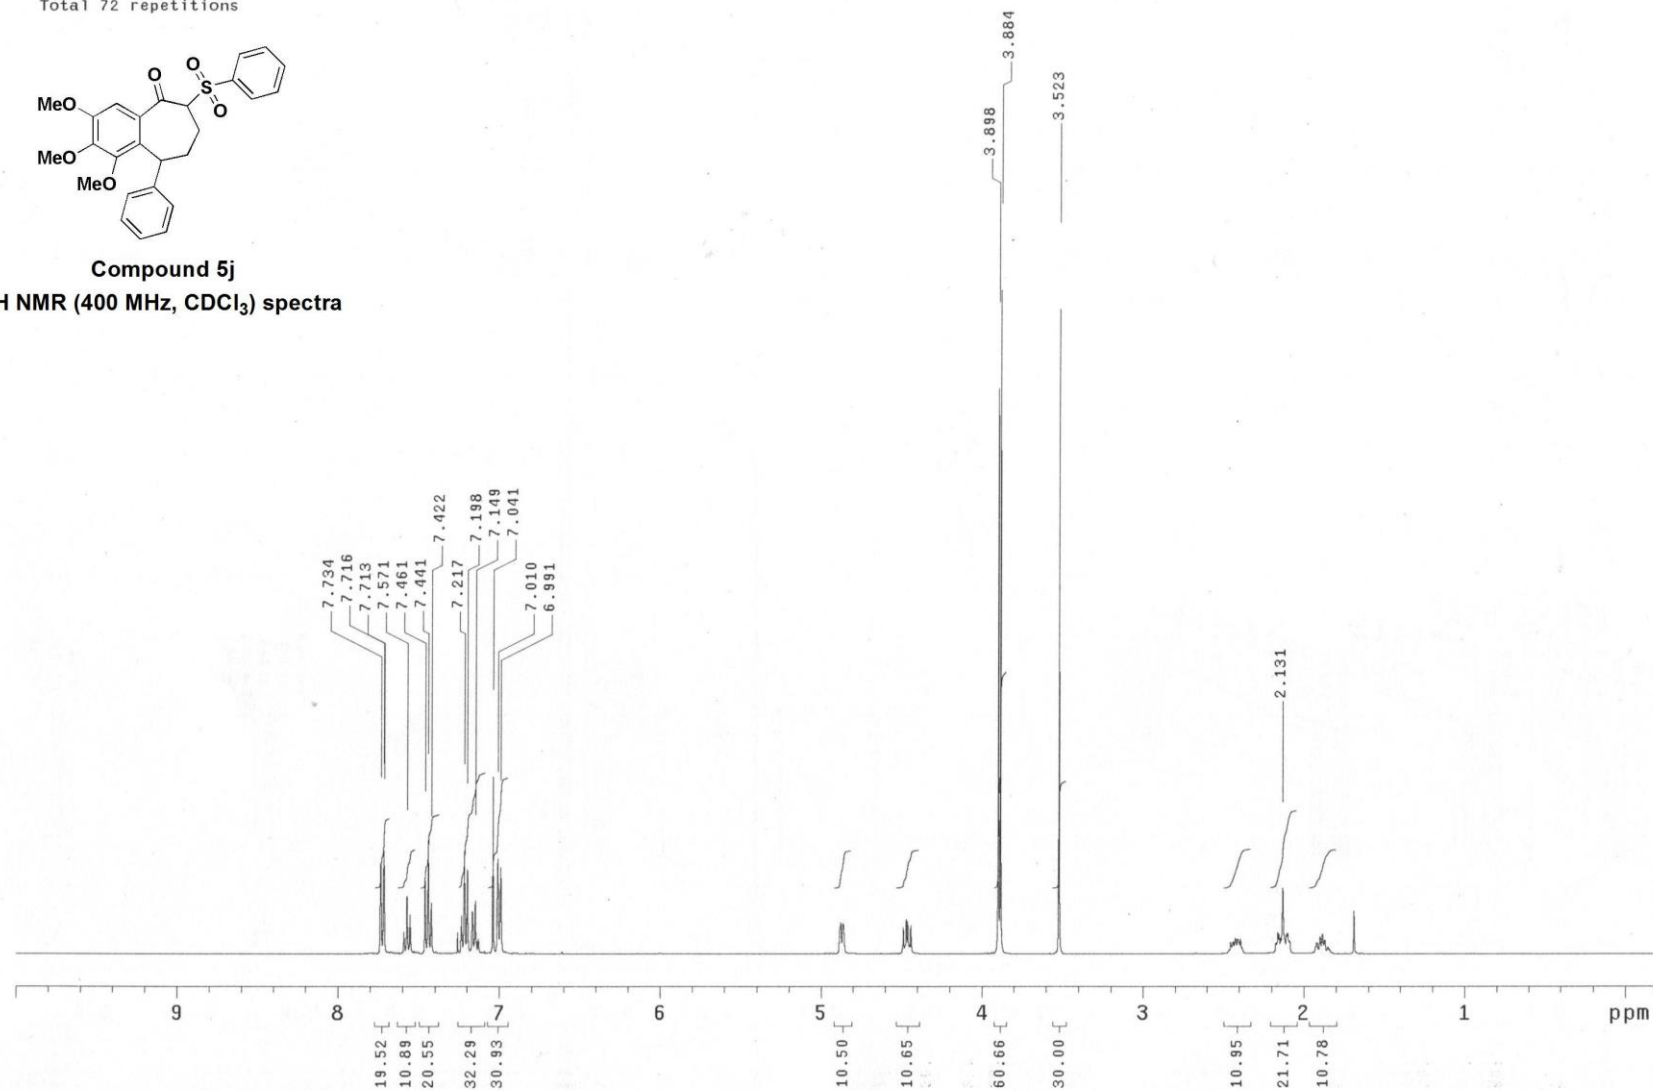

# Compound 5j (<sup>1</sup>H-NMR spectral data-2)

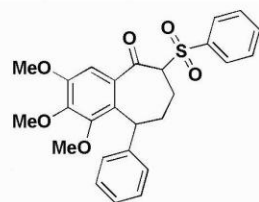

Compound 5j

<sup>1</sup>H NMR (400 MHz, CDCl<sub>3</sub>) spectra

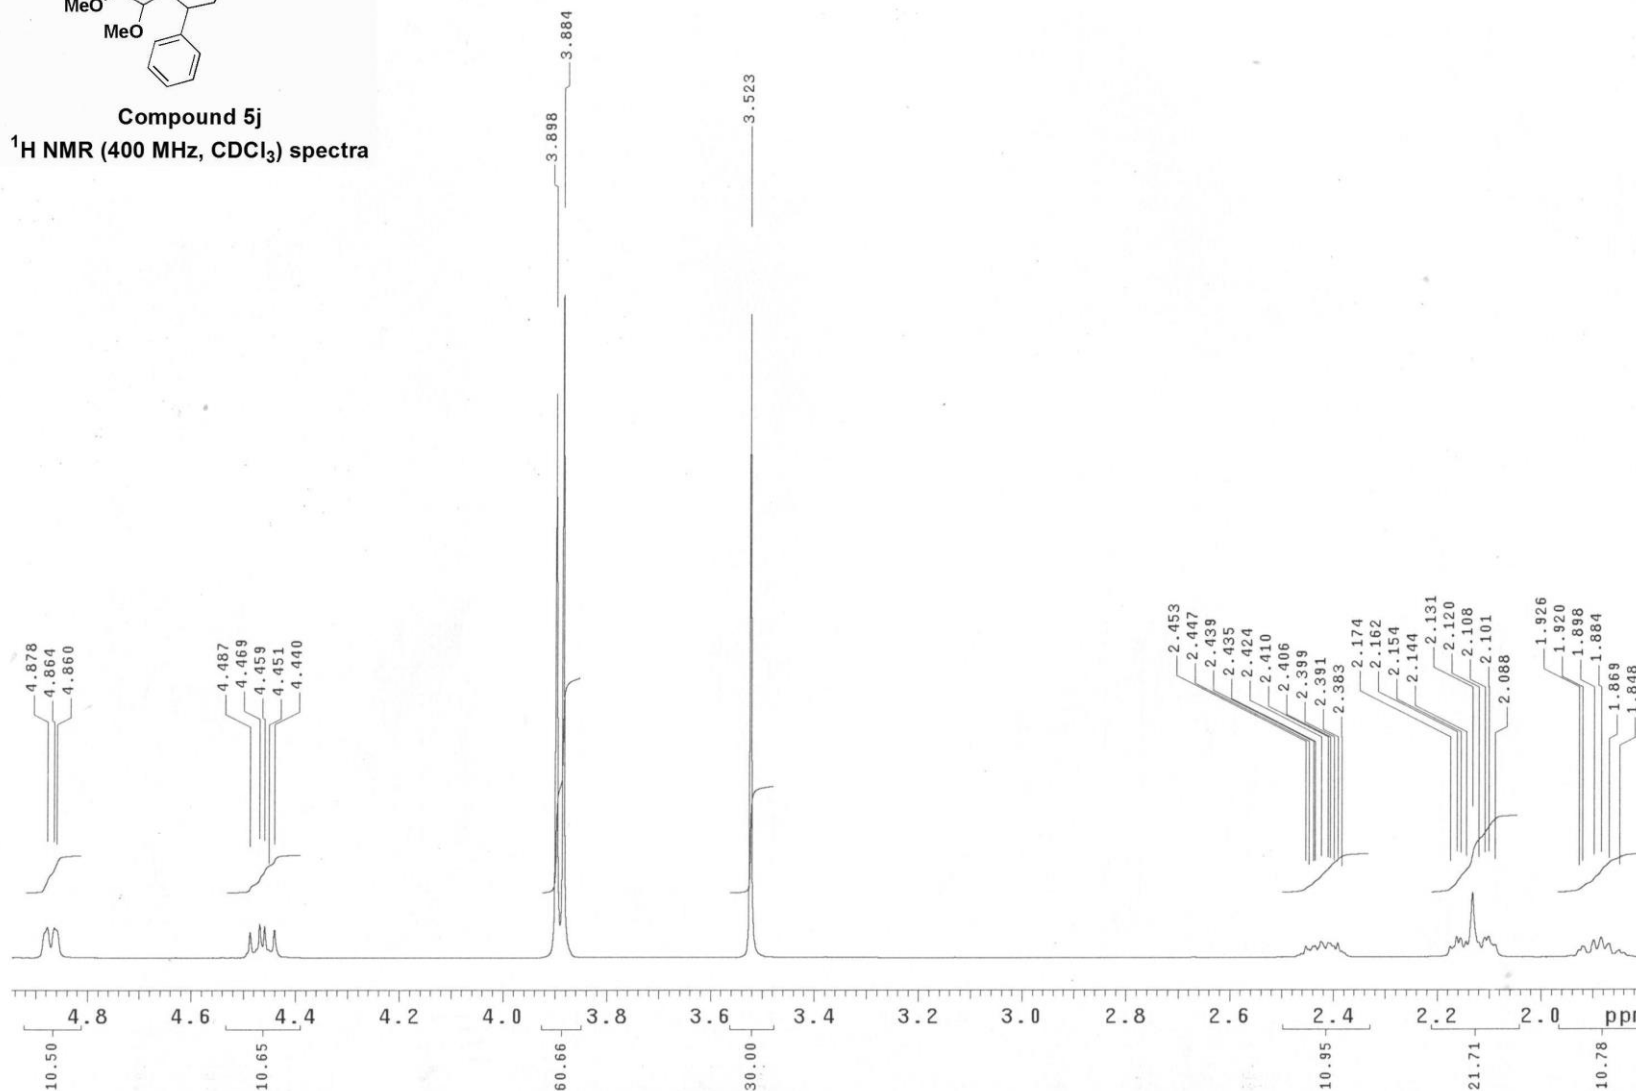

# Compound 5j ( $^{13}\text{C}$ -NMR spectral data)

KS30BSCBF

Pulse Sequence: s2pu1

UNITYplus-400 "unity400"

Date: Feb 19 2019

Solvent:  $\text{CDCl}_3$

Ambient temperature

Total 480 repetitions

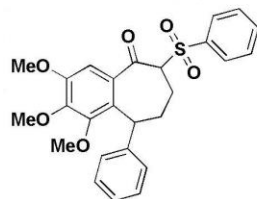

Compound 5j

$^{13}\text{C}$  NMR (100 MHz,  $\text{CDCl}_3$ ) spectra

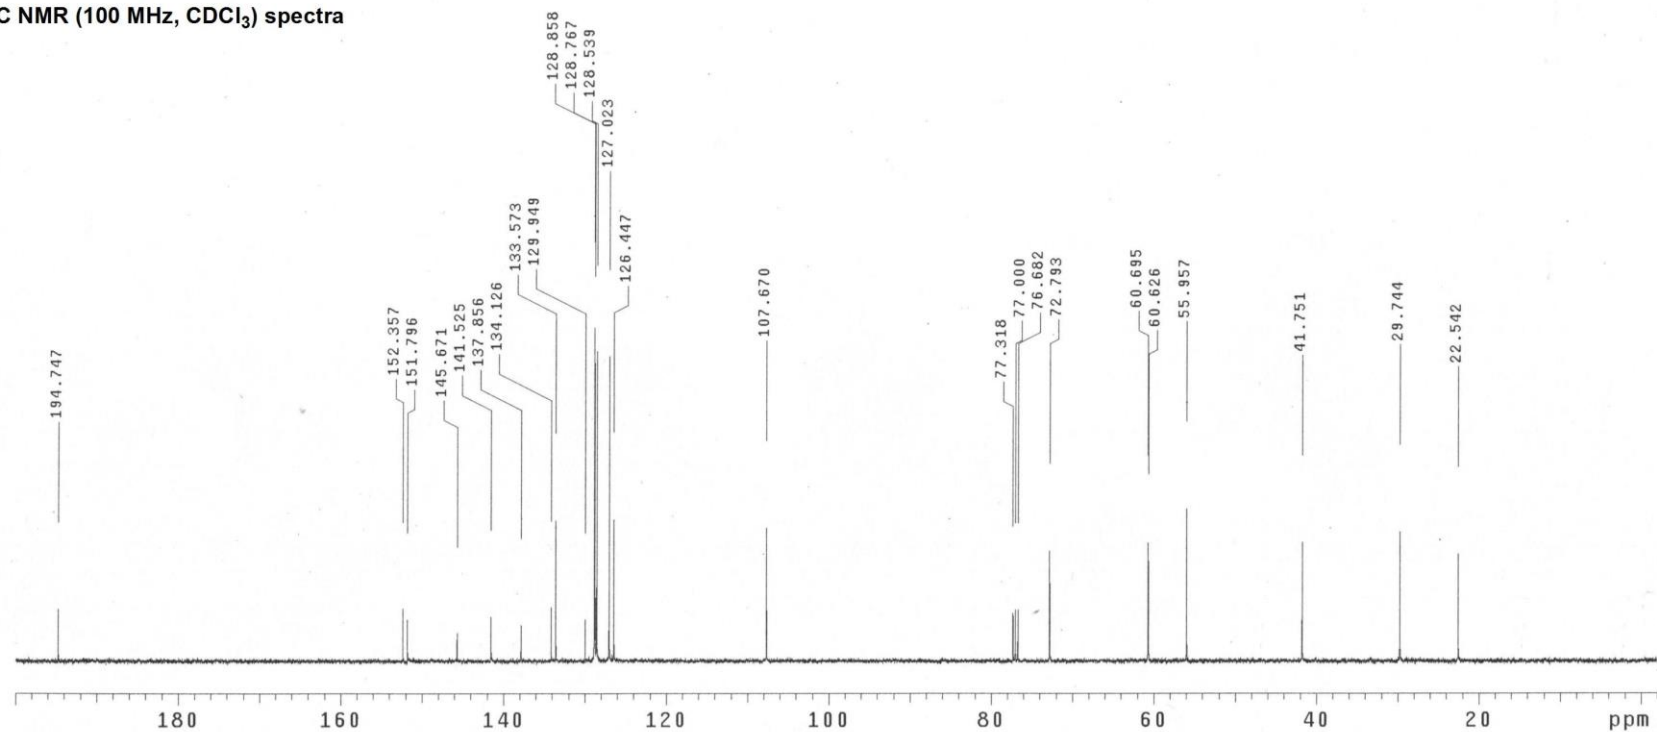

# Compound 5k (<sup>1</sup>H-NMR spectral data-1)

KS30MscBF

Pulse Sequence: s2pu1

UNITYplus-400 "unity400"

Date: Feb 13 2019

Solvent: CDCl<sub>3</sub>

Ambient temperature

Total 32 repetitions

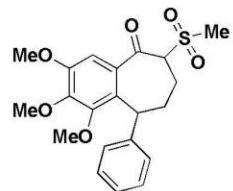

Compound 5k

<sup>1</sup>H NMR (400 MHz, CDCl<sub>3</sub>) spectra

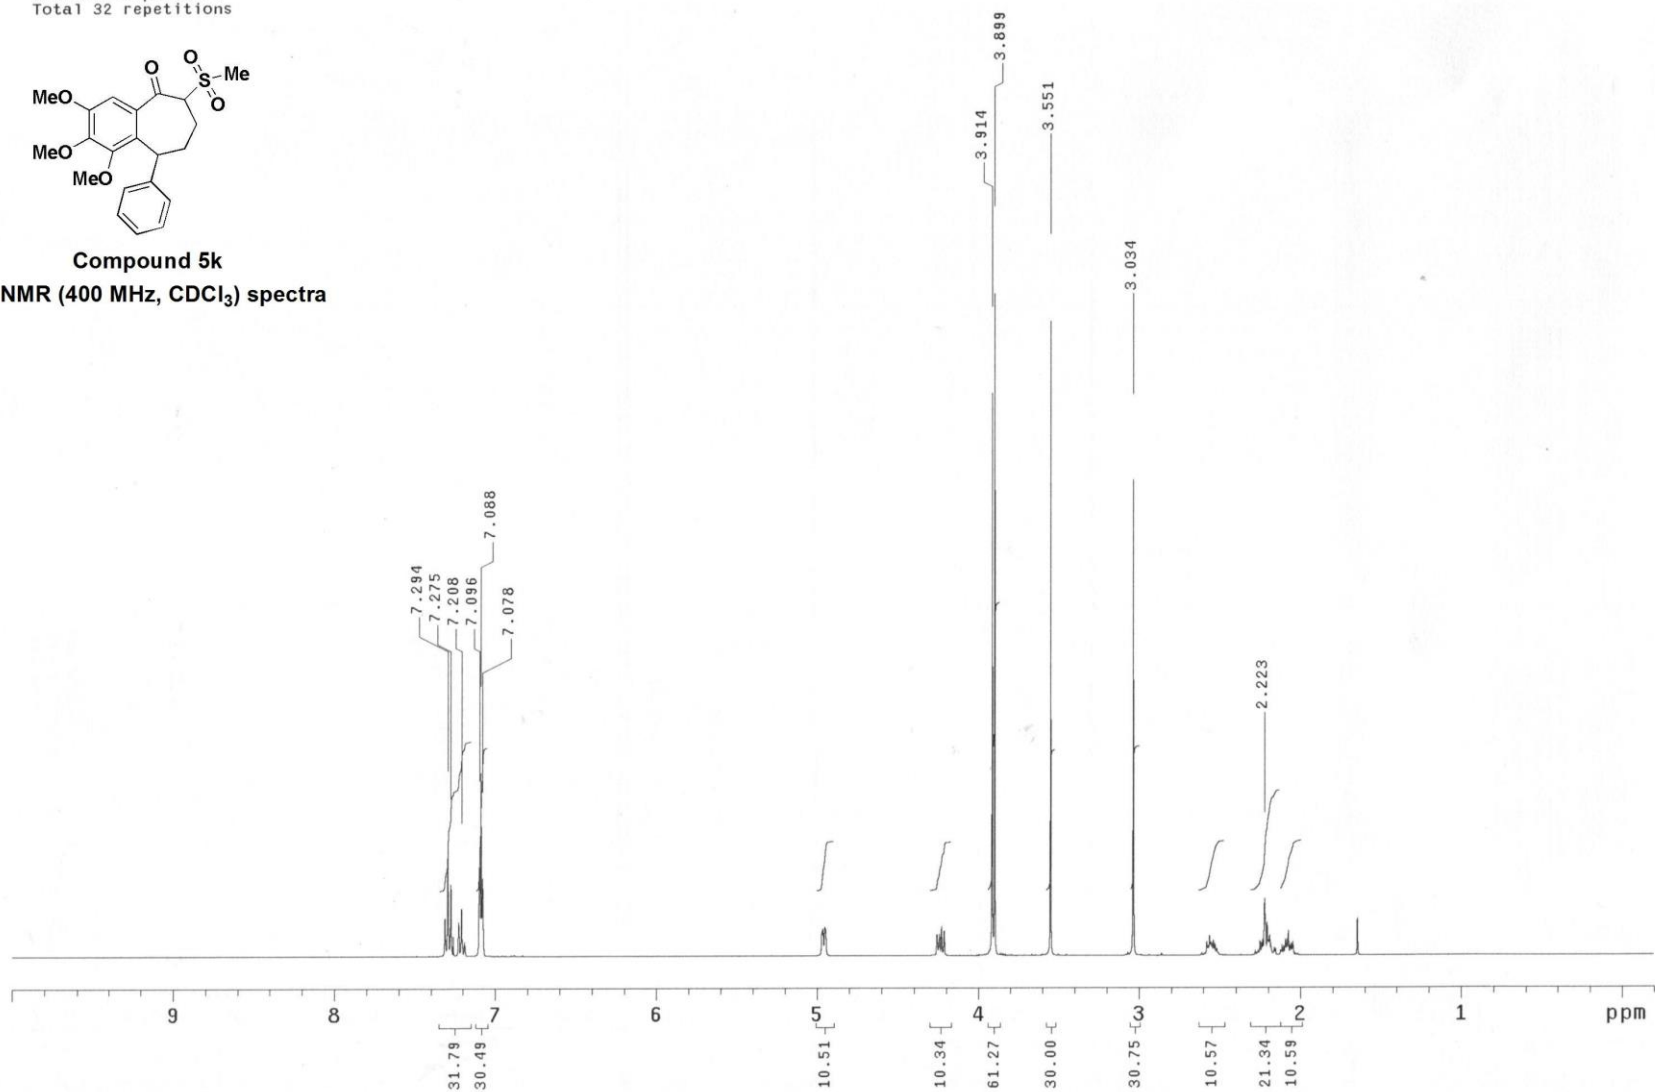

# Compound 5k (<sup>1</sup>H-NMR spectral data-2)

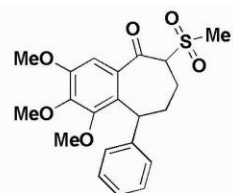

Compound 5k  
<sup>1</sup>H NMR (400 MHz, CDCl<sub>3</sub>) spectra

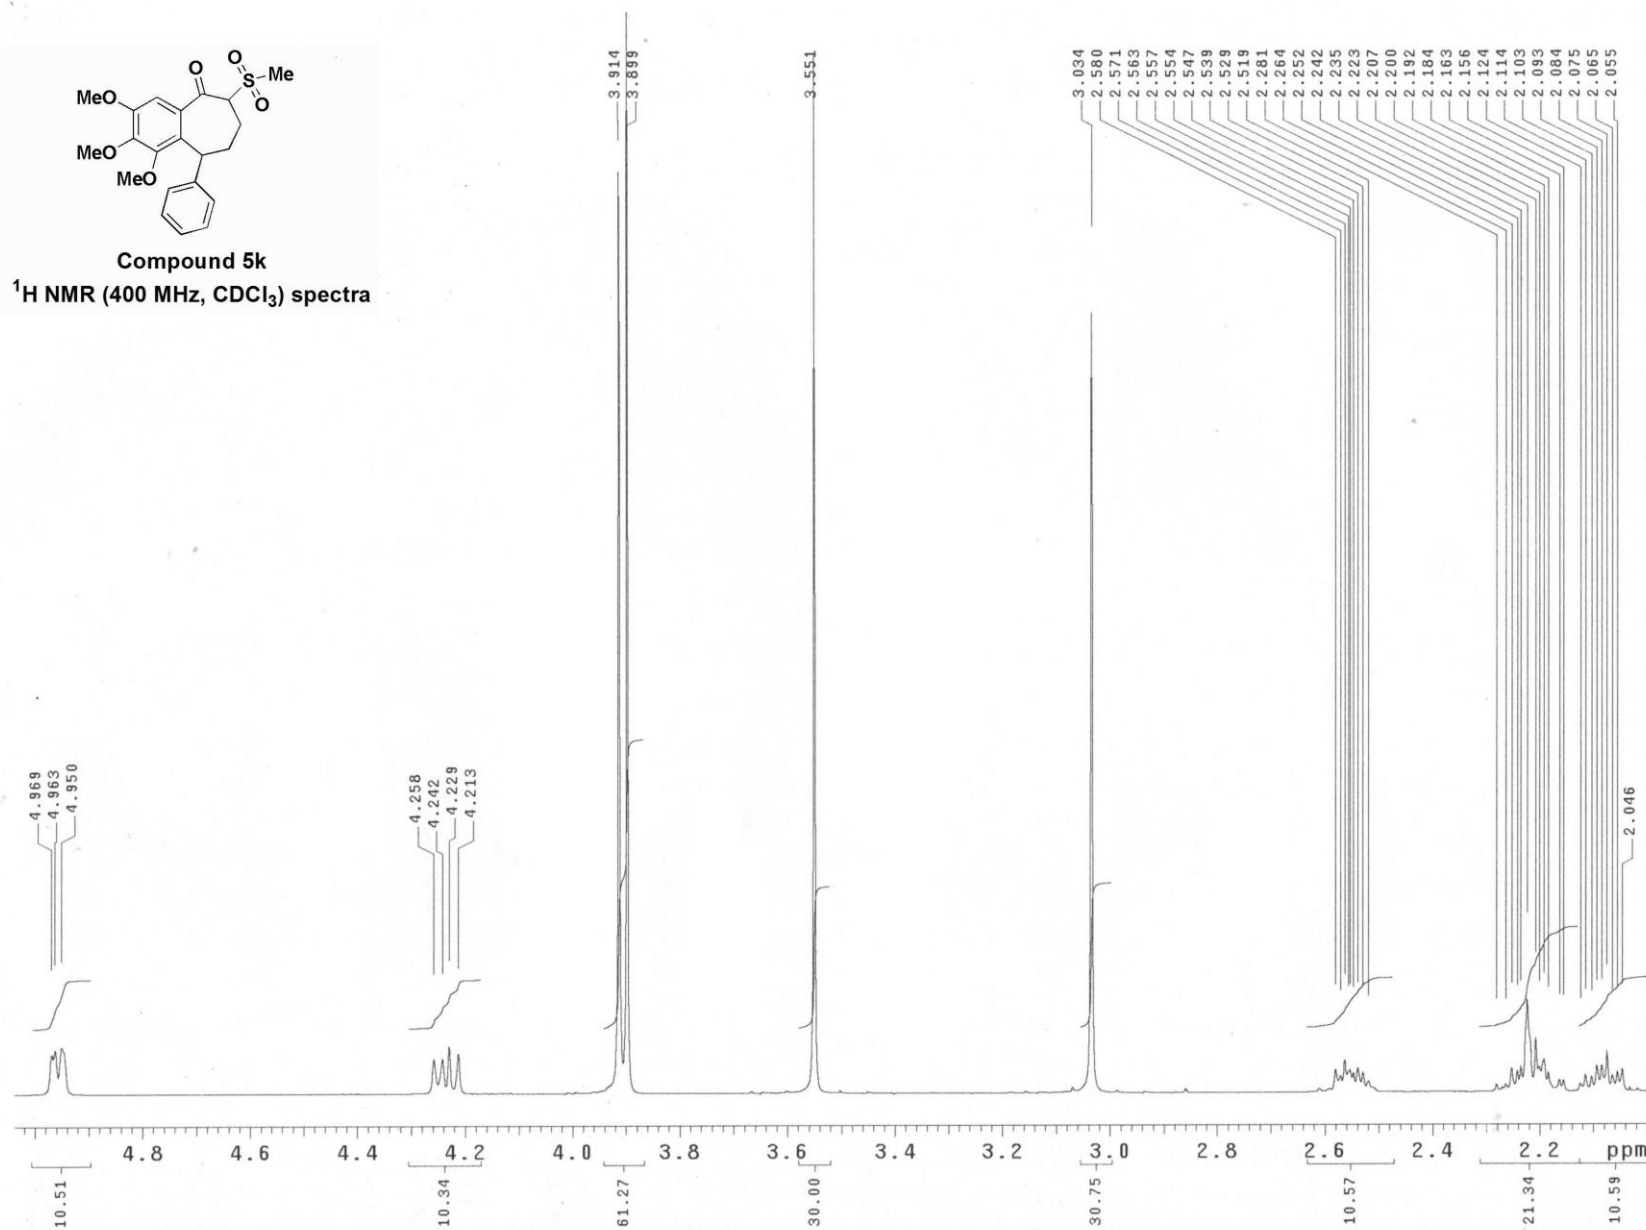

# Compound 5k (<sup>13</sup>C-NMR spectral data)

KS30MsCBF

Pulse Sequence: s2pu1

UNITYplus-400 "unity400"

Date: Feb 13 2019

Solvent: CDCl<sub>3</sub>

Ambient temperature

Total 576 repetitions

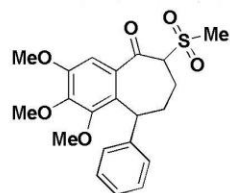

Compound 5k

<sup>13</sup>C NMR (100 MHz, CDCl<sub>3</sub>) spectra

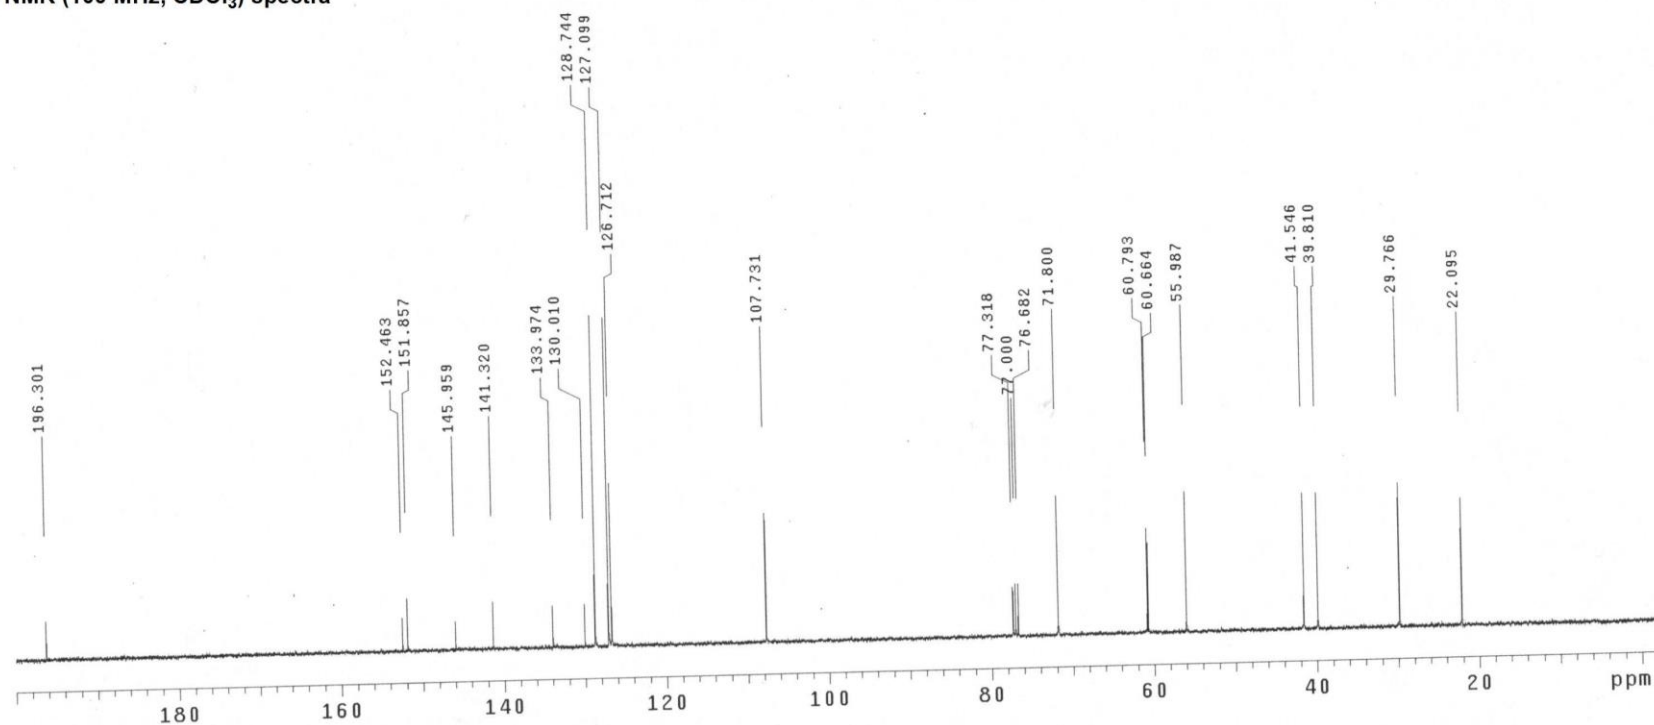

# Compound 5I (<sup>1</sup>H-NMR spectral data-1)

KSE2CBF

Pulse Sequence: s2pu1

UNITYplus-400 "unity400"

Date: Dec 3 2018

Solvent: CDCl<sub>3</sub>

Ambient temperature

Total 32 repetitions

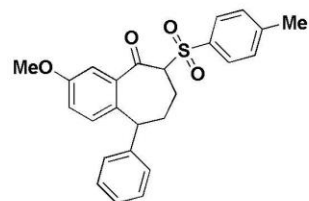

Compound 5I

<sup>1</sup>H NMR (400 MHz, CDCl<sub>3</sub>) spectra

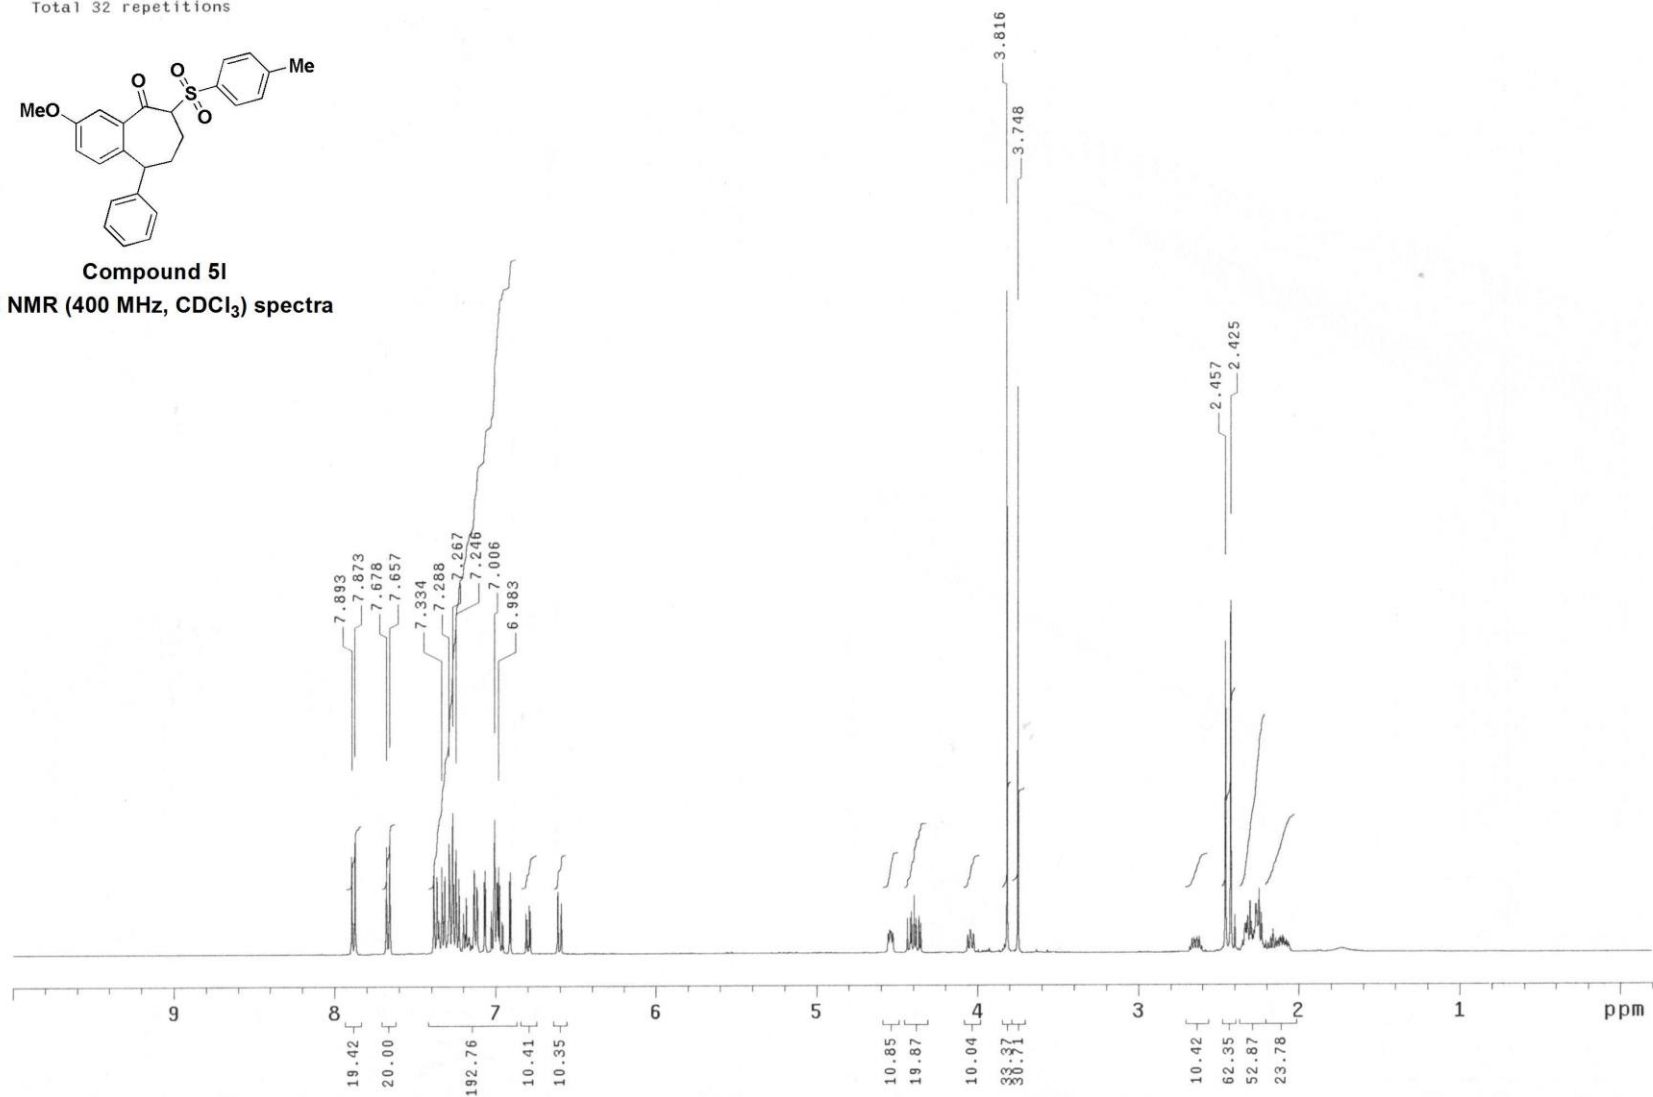

# Compound 5l (<sup>1</sup>H-NMR spectral data-2)

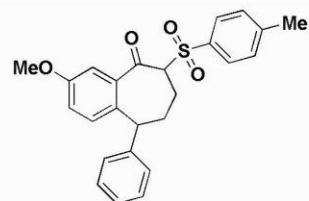

**Compound 5l**  
**<sup>1</sup>H NMR (400 MHz, CDCl<sub>3</sub>) spectra**

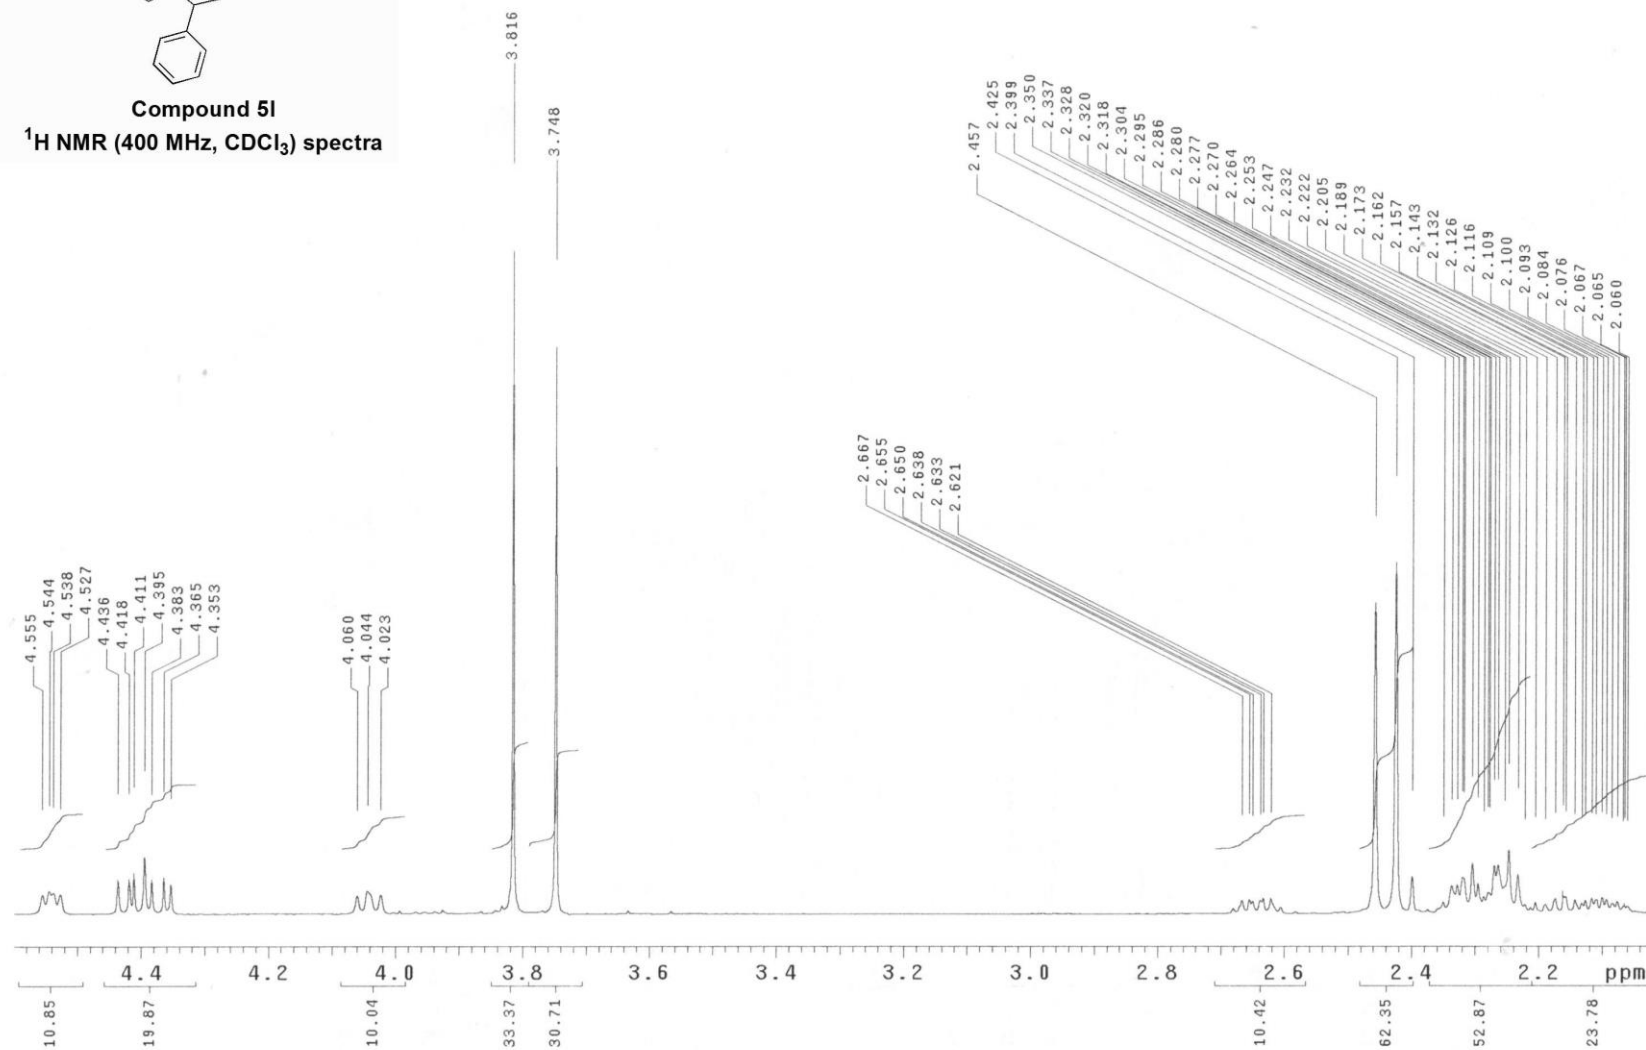

# Compound 5I (<sup>13</sup>C-NMR spectral data)

KSE2CBF

Pulse Sequence: s2pul

UNITYplus-400 "unity400"

Date: Dec 3 2018

Solvent: CDCl<sub>3</sub>

Ambient temperature

Total 544 repetitions

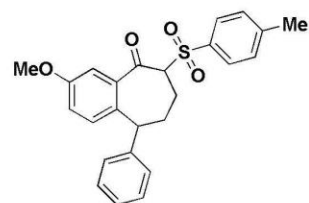

Compound 5I

<sup>13</sup>C NMR (100 MHz, CDCl<sub>3</sub>) spectra

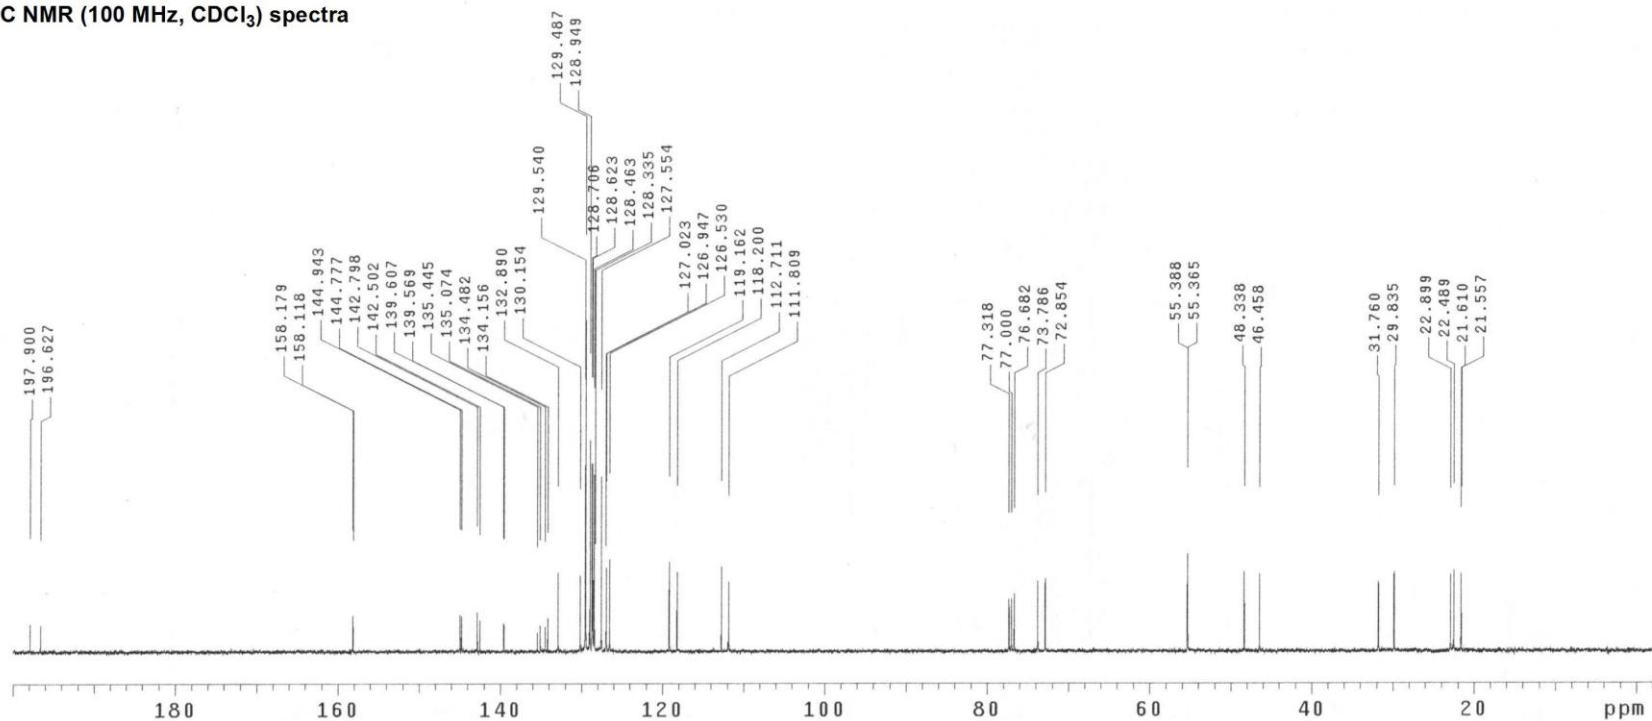

# Compound 6a (<sup>1</sup>H-NMR spectral data-1)

KSTsDBF

Pulse Sequence: s2pu1  
 UNITYplus-400 "unity400"  
 Date: Mar 4 2019  
 Solvent: CDCl<sub>3</sub>  
 Ambient temperature  
 Total 32 repetitions

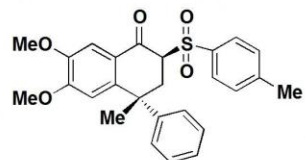

Compound 6a

<sup>1</sup>H NMR (400 MHz, CDCl<sub>3</sub>) spectra

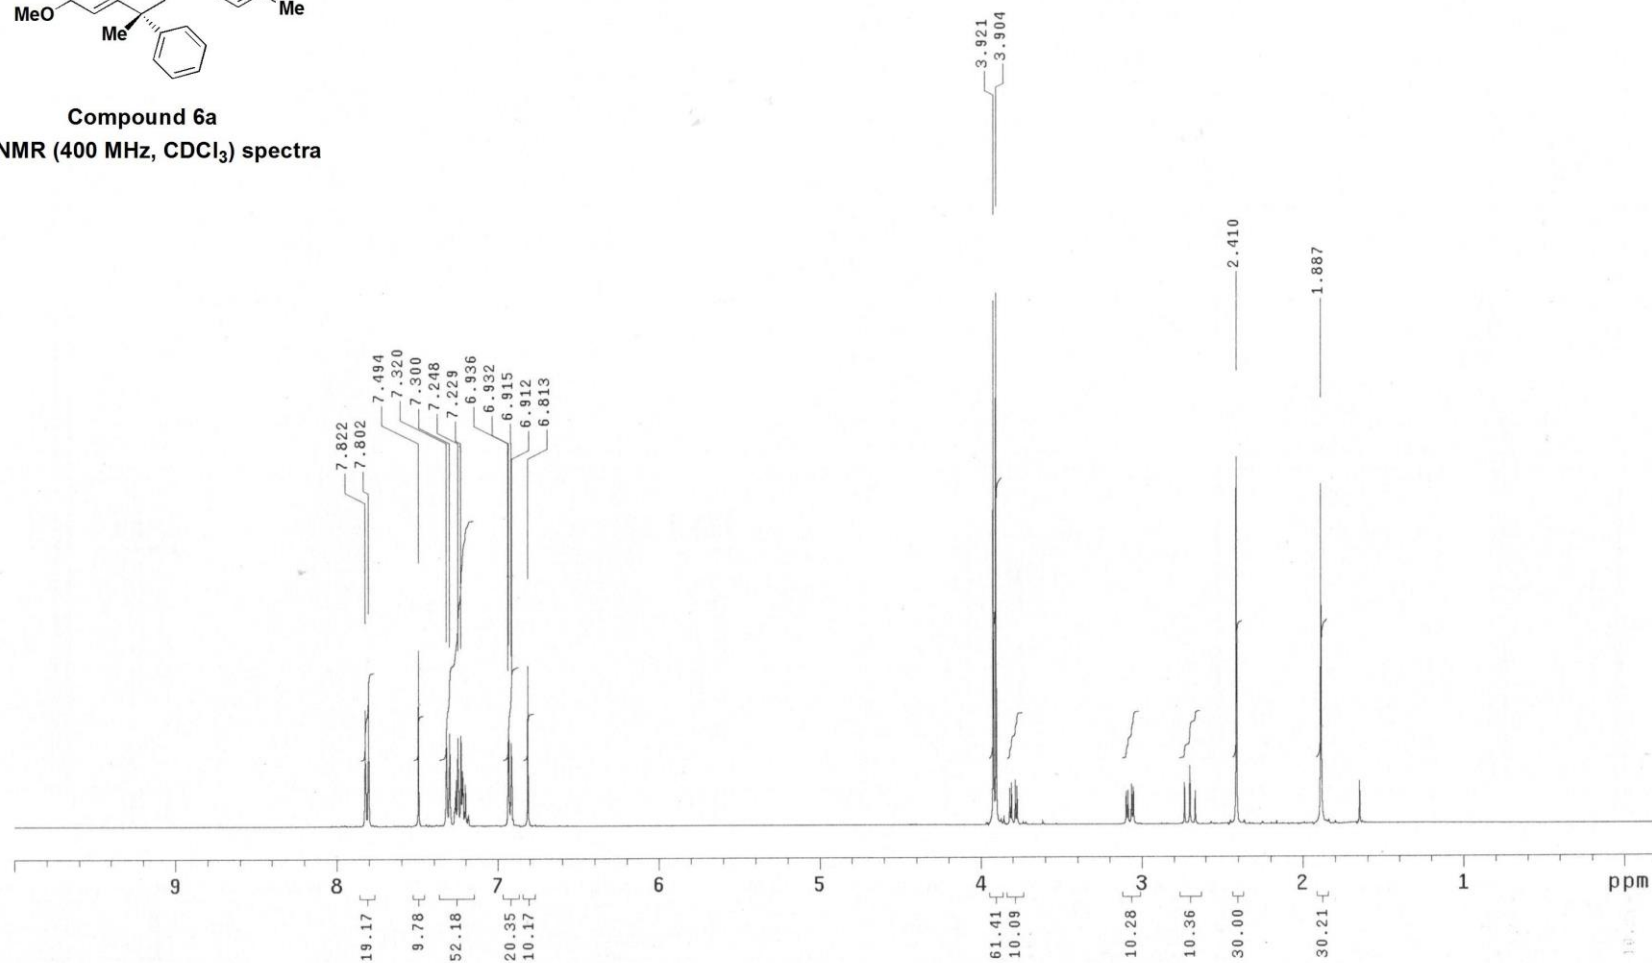

# Compound 6a (<sup>1</sup>H-NMR spectral data-2)

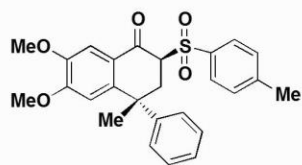

Compound 6a

<sup>1</sup>H NMR (400 MHz, CDCl<sub>3</sub>) spectra

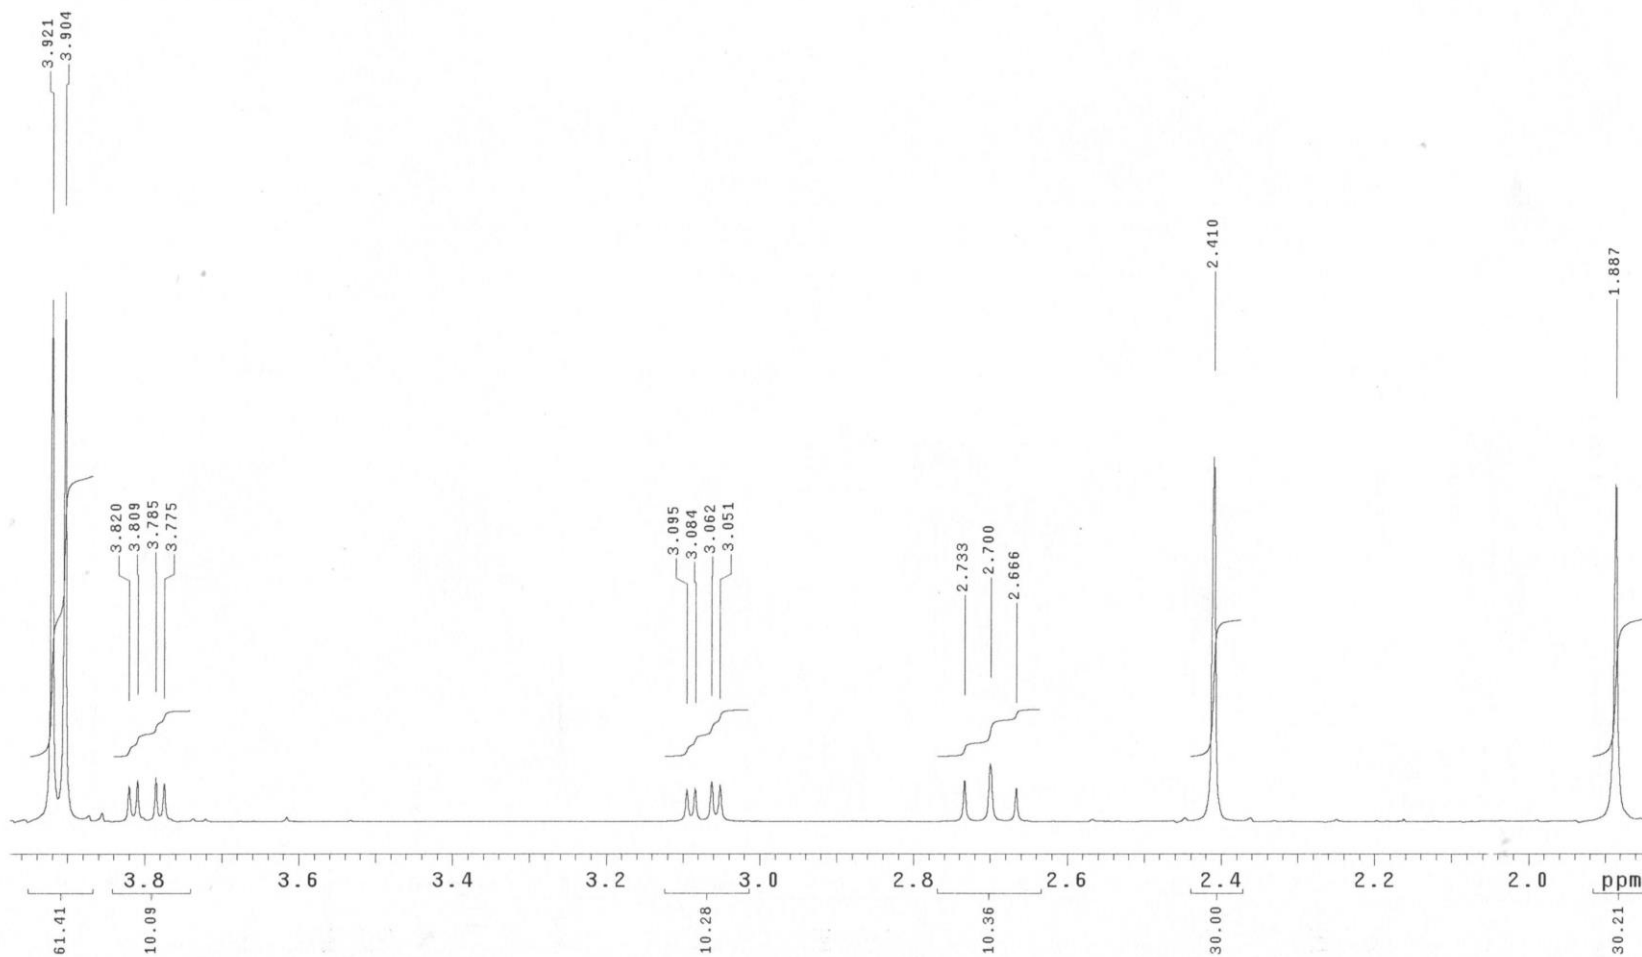

# Compound 6a (<sup>13</sup>C-NMR spectral data)

KSTsDBF

Pulse Sequence: s2pu1

UNITYplus-400 "unity400"

Date: Mar 4 2019

Solvent: CDCl<sub>3</sub>

Ambient temperature

Total 1024 repetitions

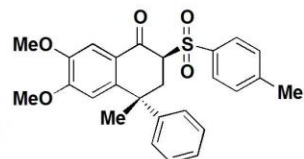

Compound 6a

<sup>13</sup>C NMR (100 MHz, CDCl<sub>3</sub>) spectra

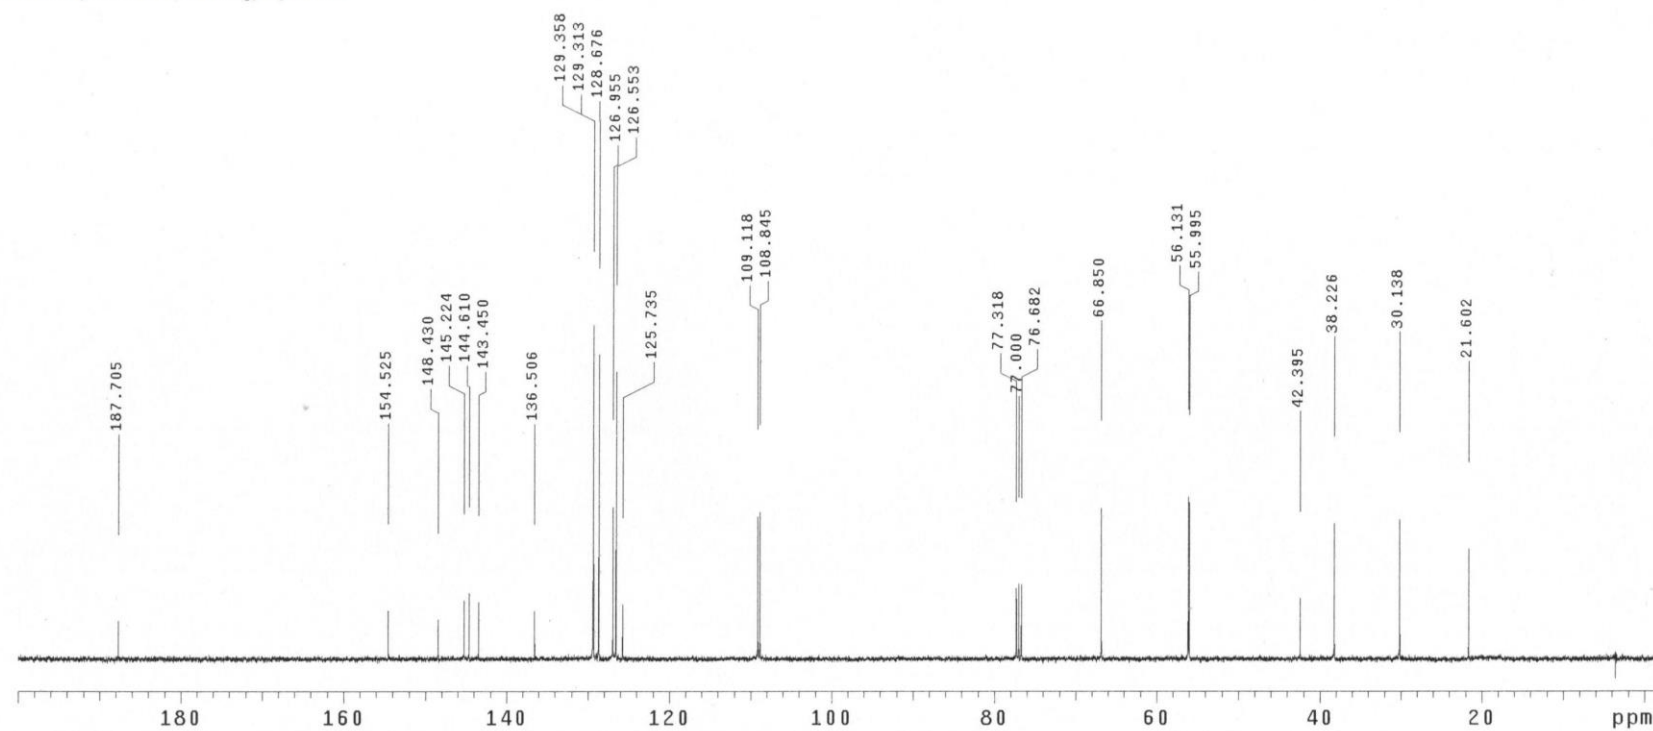

# Compound 6b (<sup>1</sup>H-NMR spectral data-1)

KSBSDBF

Pulse Sequence: s2pu1  
 UNITYplus-400 "unity400"  
 Date: Mar 14 2019  
 Solvent: CDCl<sub>3</sub>  
 Ambient temperature  
 Total 32 repetitions

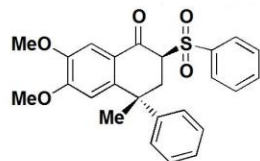

Compound 6b

<sup>1</sup>H NMR (400 MHz, CDCl<sub>3</sub>) spectra

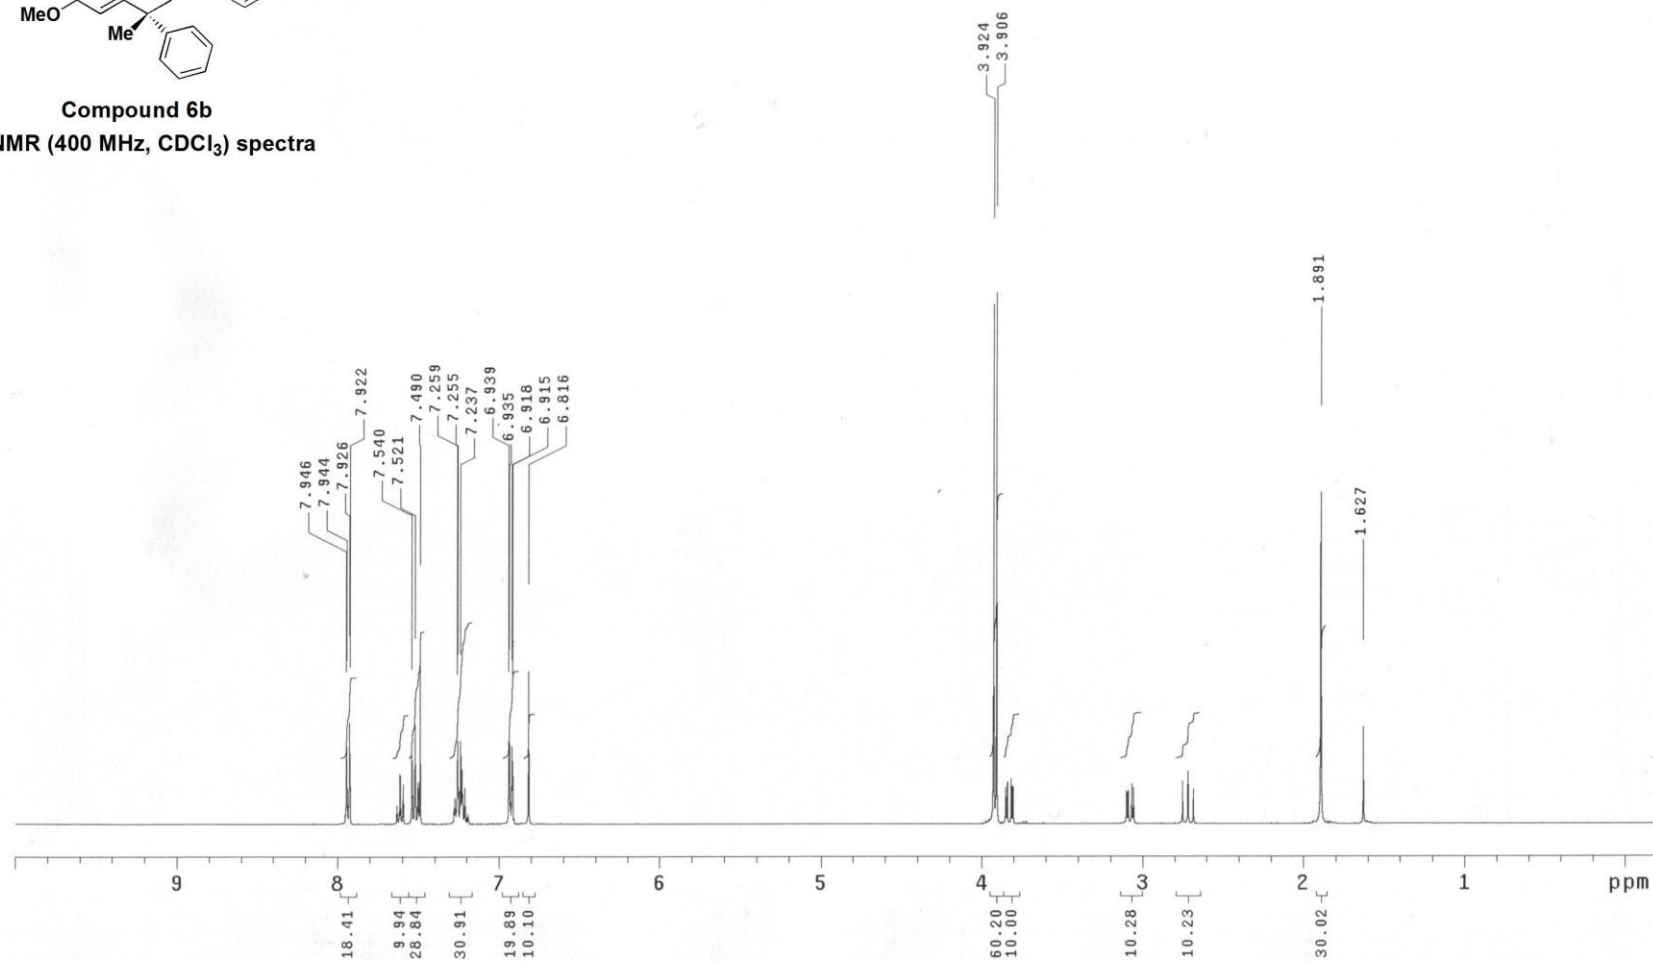

## Compound 6b (<sup>1</sup>H-NMR spectral data-2)

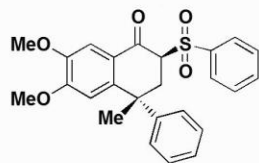

Compound 6b

<sup>1</sup>H NMR (400 MHz, CDCl<sub>3</sub>) spectra

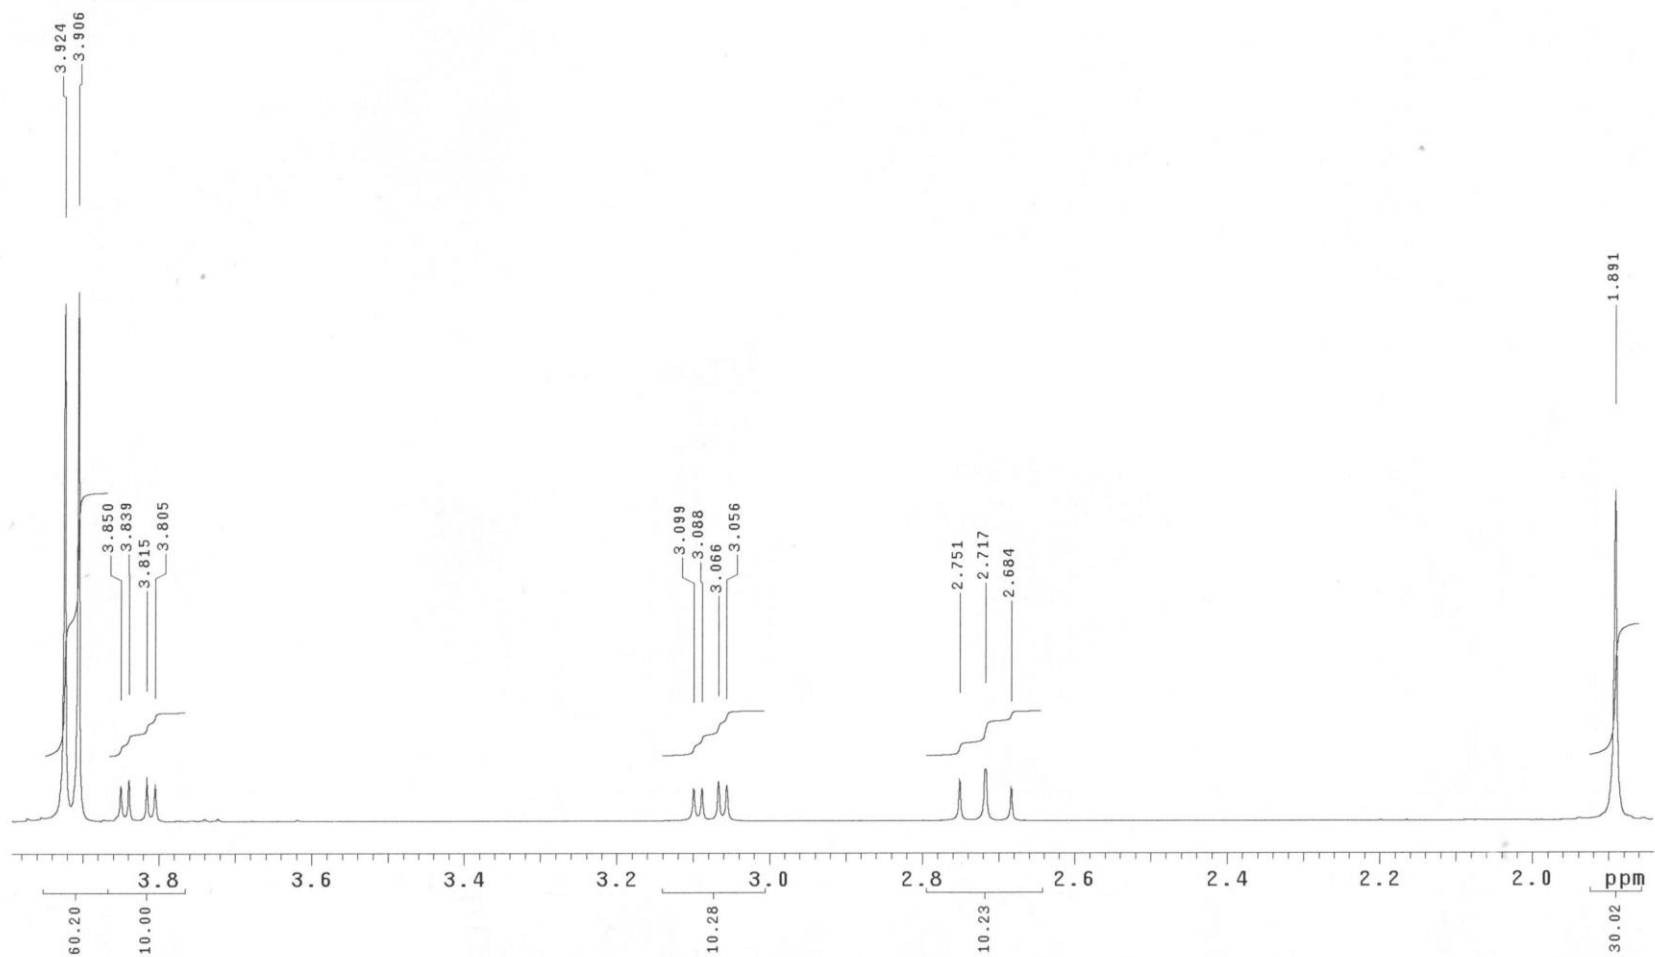

# Compound 6b ( $^{13}\text{C}$ -NMR spectral data)

KSBSDBF

Pulse Sequence: s2pu1  
UNITYplus-400 "unity400"  
Date: Mar 14 2019  
Solvent:  $\text{CDCl}_3$   
Ambient temperature  
Total 1712 repetitions

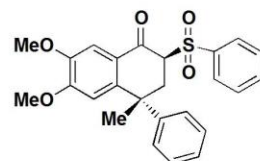

Compound 6b

$^{13}\text{C}$  NMR (100 MHz,  $\text{CDCl}_3$ ) spectra

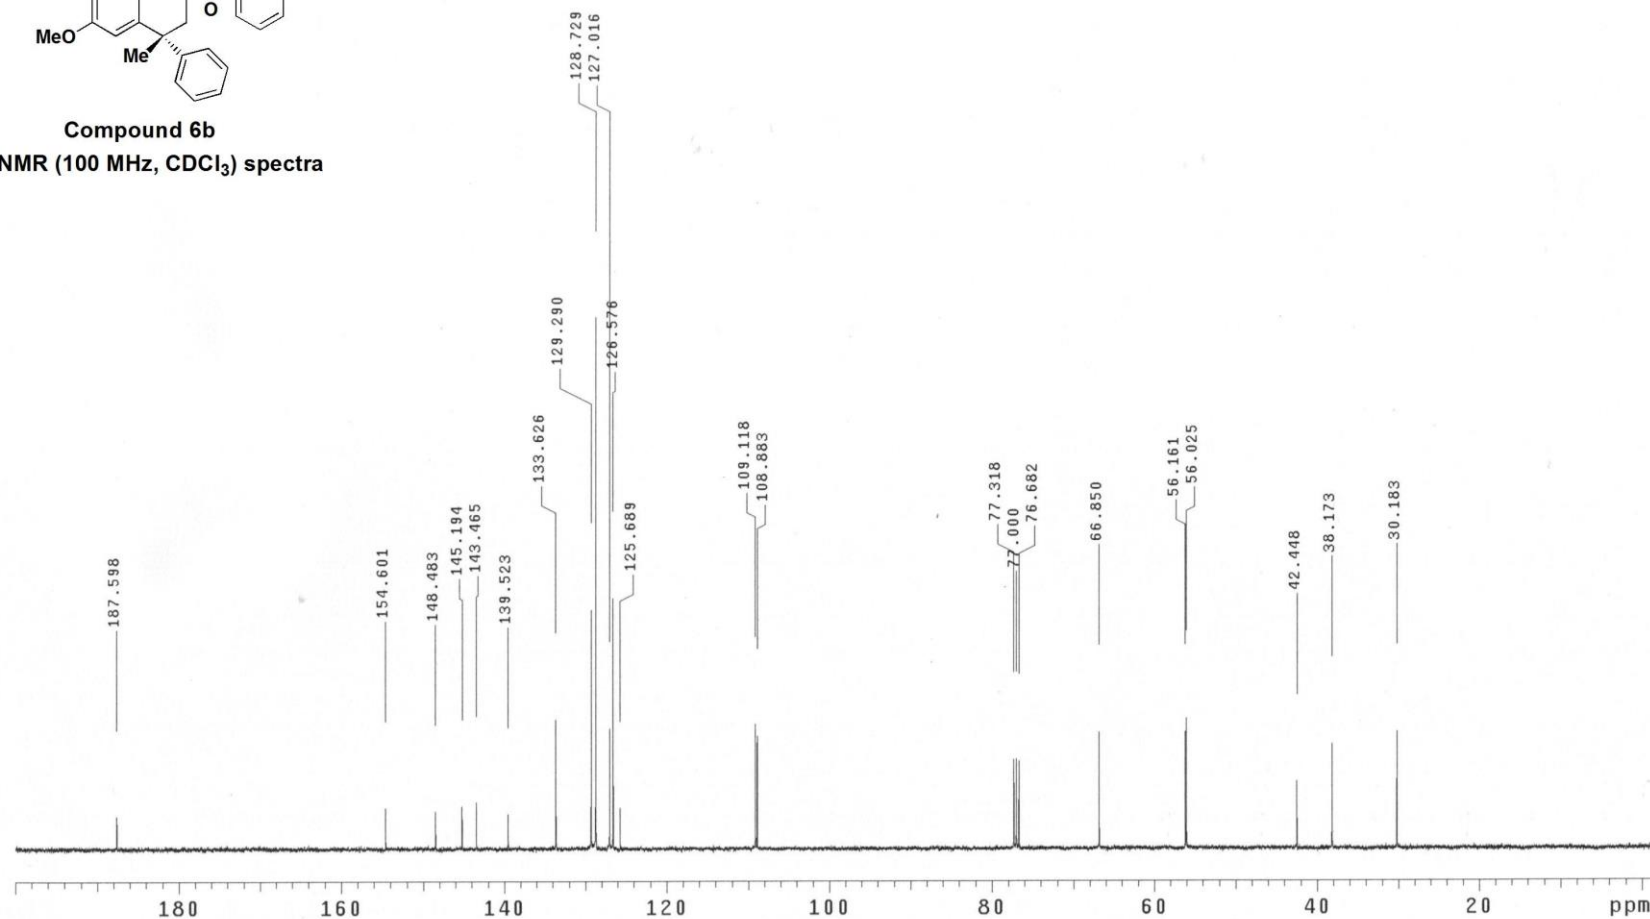

# Compound 6c (<sup>1</sup>H-NMR spectral data-1)

KSMSDBF

Pulse Sequence: s2pu1

UNITYplus-400 "unity400"

Date: Mar 22 2019

Solvent: CDCl<sub>3</sub>

Ambient temperature

Total 32 repetitions

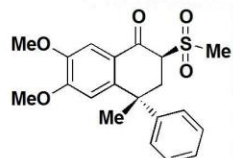

Compound 6c

<sup>1</sup>H NMR (400 MHz, CDCl<sub>3</sub>) spectra

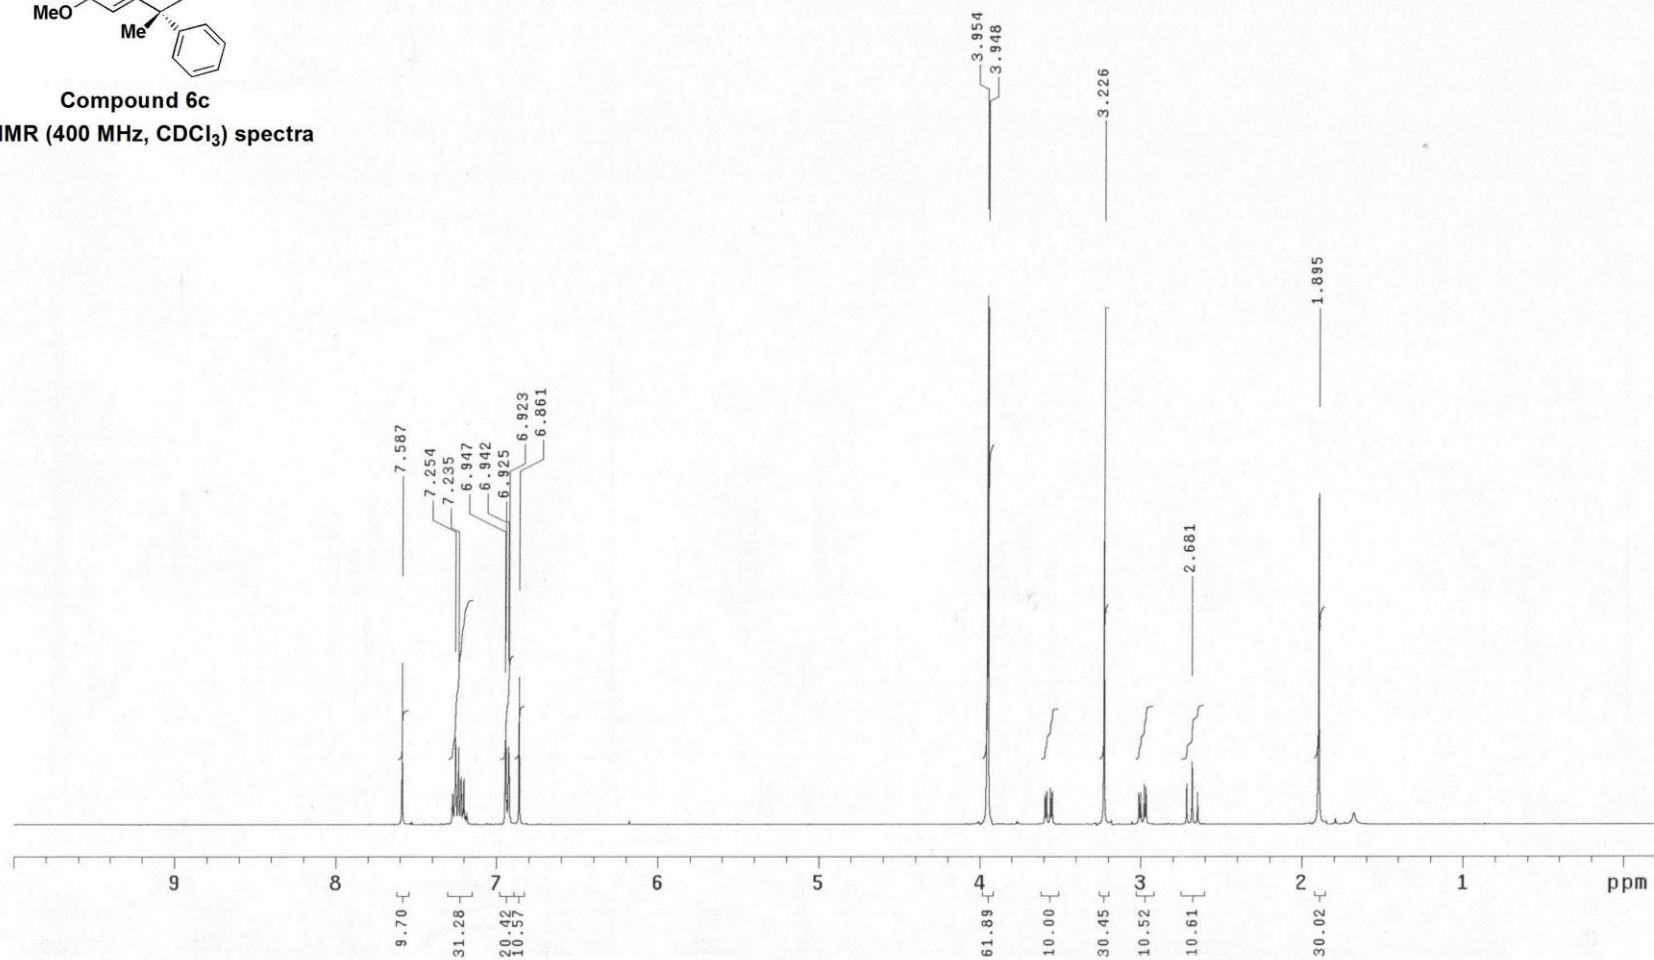

# Compound 6c (<sup>1</sup>H-NMR spectral data-2)

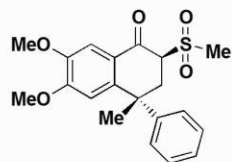

Compound 6c

<sup>1</sup>H NMR (400 MHz, CDCl<sub>3</sub>) spectra

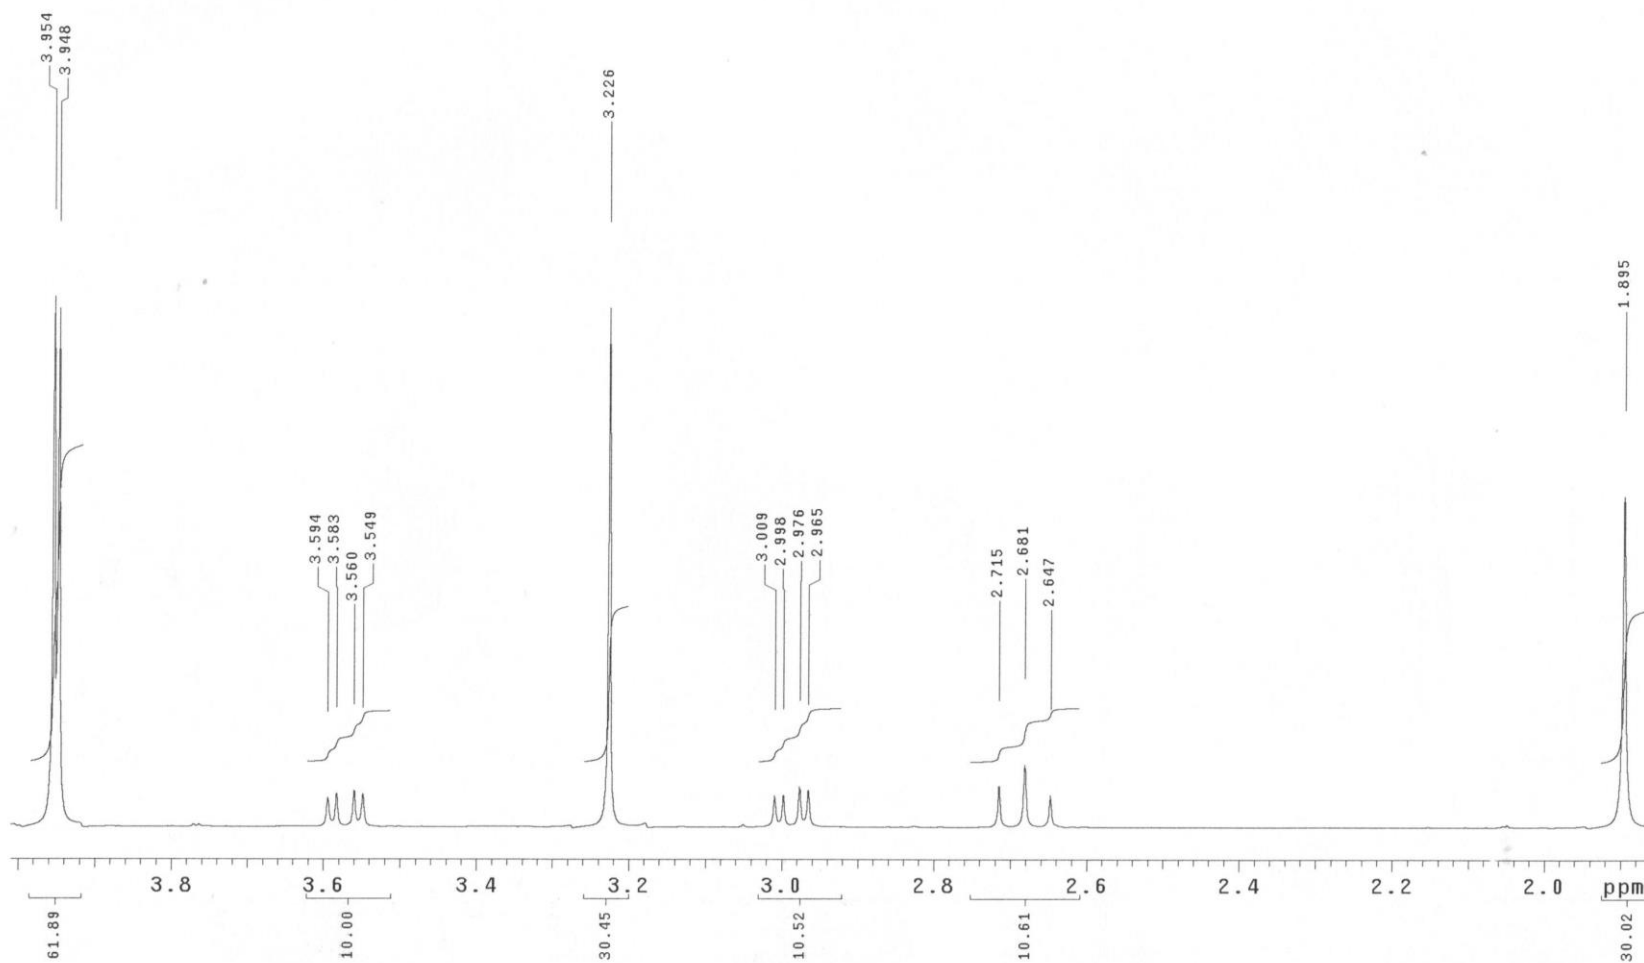

# Compound 6c ( $^{13}\text{C}$ -NMR spectral data)

KSMSDBF

Pulse Sequence: s2pu1

UNITYplus-400 "unity400"

Date: Mar 22 2019

Solvent:  $\text{CDCl}_3$

Ambient temperature

Total 432 repetitions

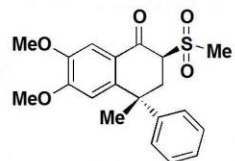

Compound 6c

$^{13}\text{C}$  NMR (100 MHz,  $\text{CDCl}_3$ ) spectra

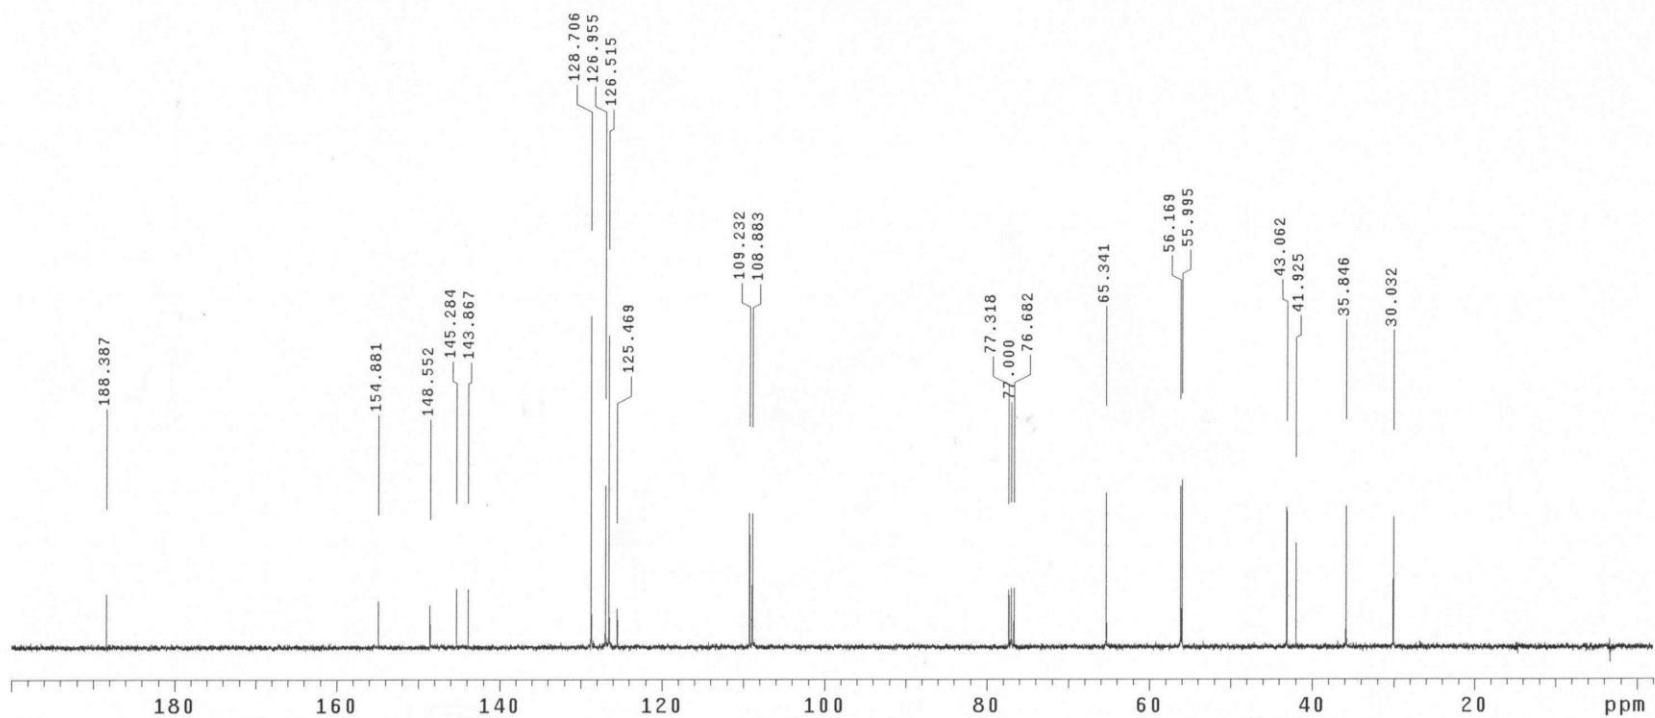

# Compound 6d (<sup>1</sup>H-NMR spectral data-1)

KSmMeDBF

Pulse Sequence: s2pu1

UNITYplus-400 "unity400"

Date: Mar 18 2019

Solvent: CDCl<sub>3</sub>

Ambient temperature

Total 32 repetitions

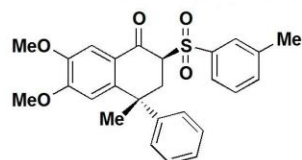

Compound 6d

<sup>1</sup>H NMR (400 MHz, CDCl<sub>3</sub>) spectra

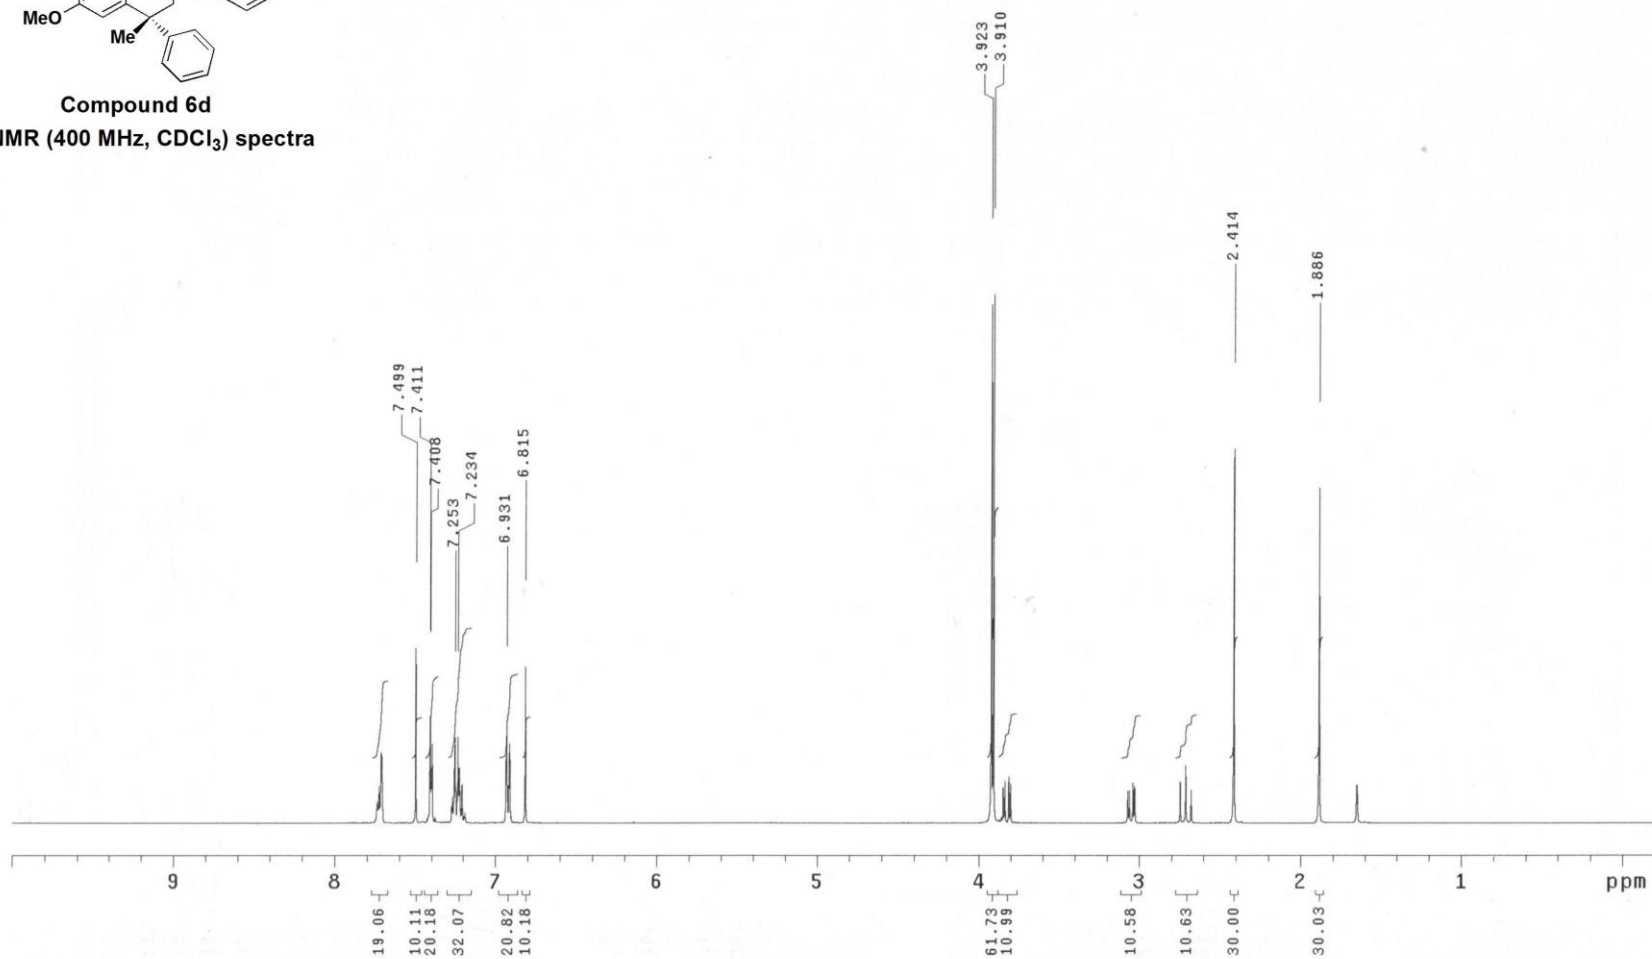

# Compound 6d (<sup>1</sup>H-NMR spectral data-2)

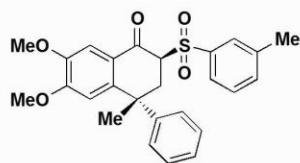

Compound 6d

<sup>1</sup>H NMR (400 MHz, CDCl<sub>3</sub>) spectra

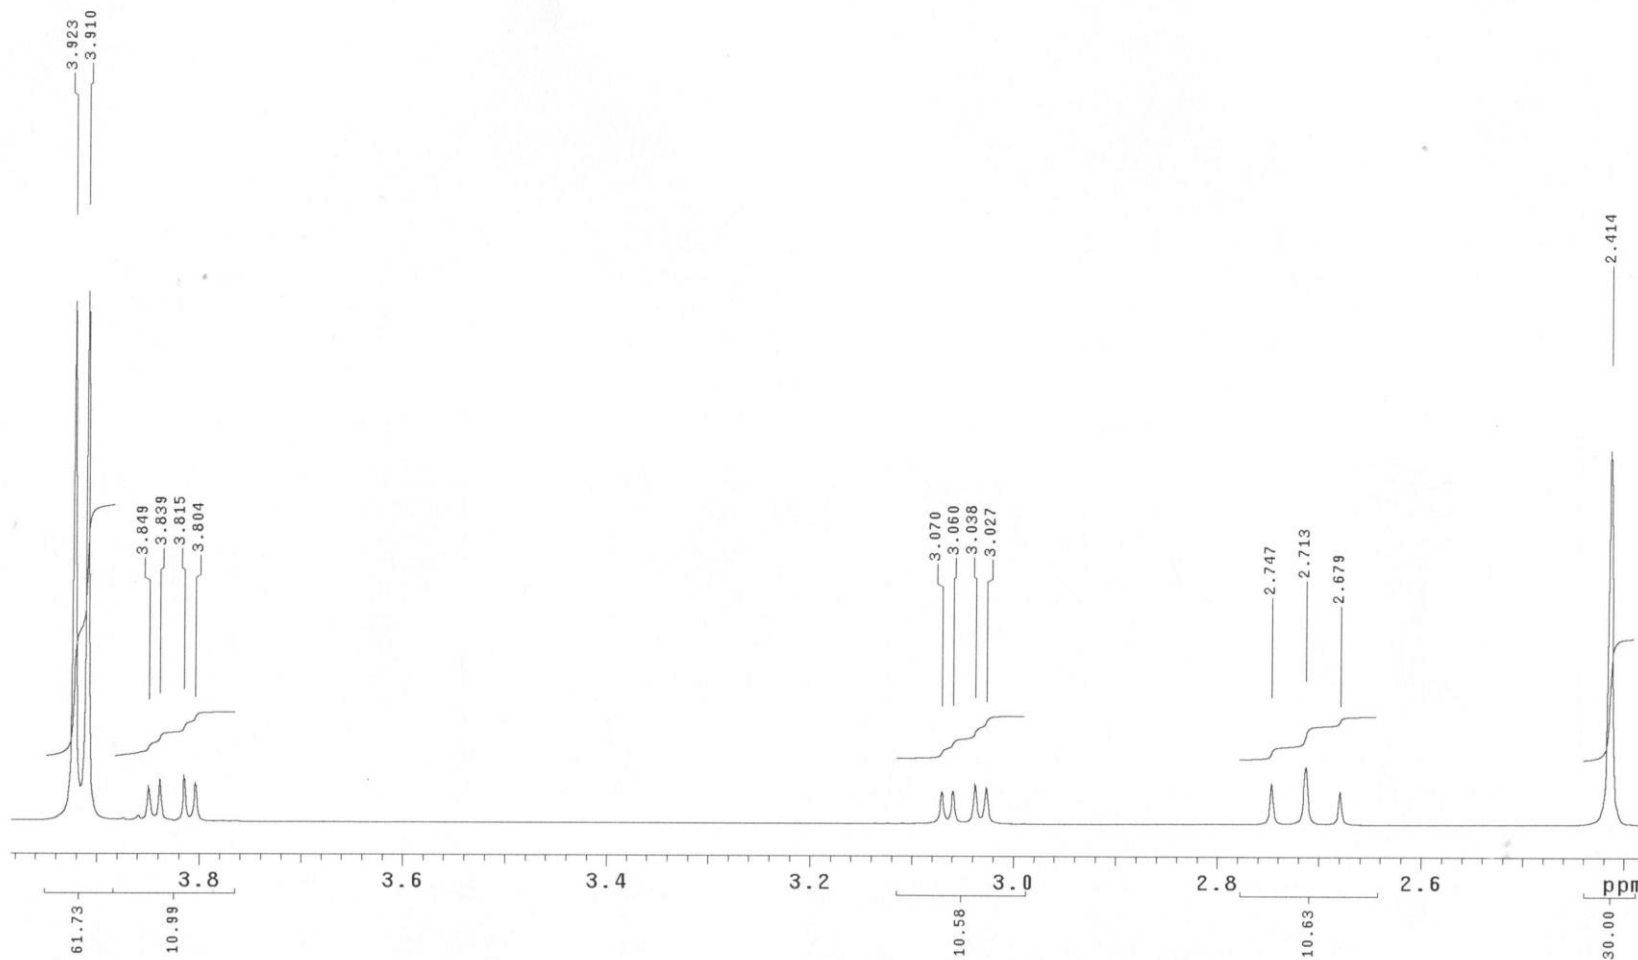

# Compound 6d ( $^{13}\text{C}$ -NMR spectral data)

KSmMeDBF

Pulse Sequence: s2pu1

UNITYplus-400 "unity400"

Date: Mar 18 2019

Solvent:  $\text{CDCl}_3$

Ambient temperature

Total 1024 repetitions

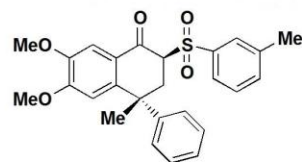

Compound 6d

$^{13}\text{C}$  NMR (100 MHz,  $\text{CDCl}_3$ ) spectra

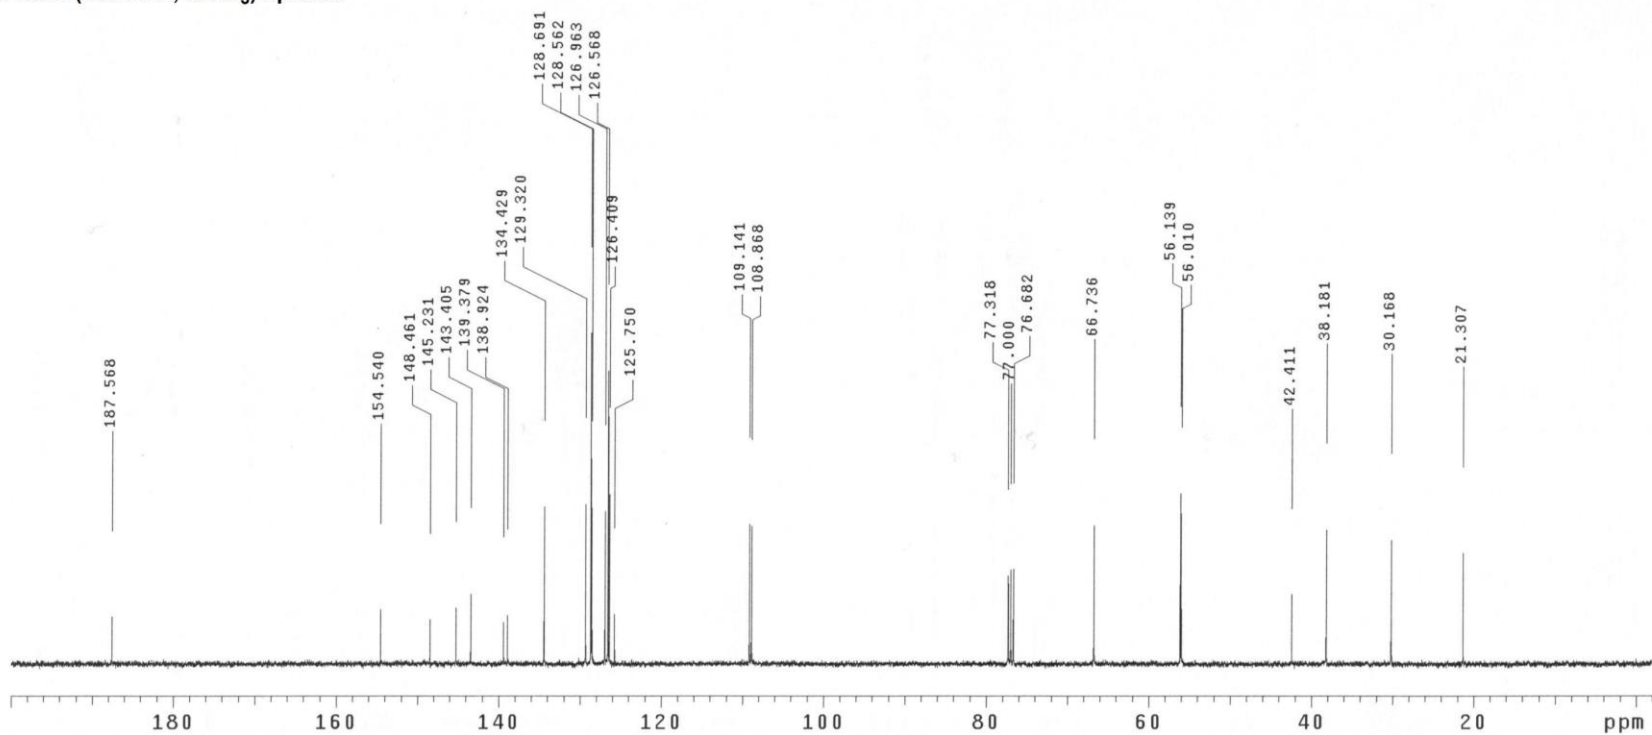

# Compound 6e (<sup>1</sup>H-NMR spectral data-1)

KS3Me0BF

Pulse Sequence: s2pu1

UNITYplus-400 "unity400"

Date: Mar 11 2019

Solvent: CDCl<sub>3</sub>

Ambient temperature

Total 32 repetitions

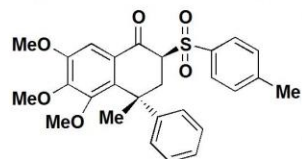

Compound 6e

<sup>1</sup>H NMR (400 MHz, CDCl<sub>3</sub>) spectra

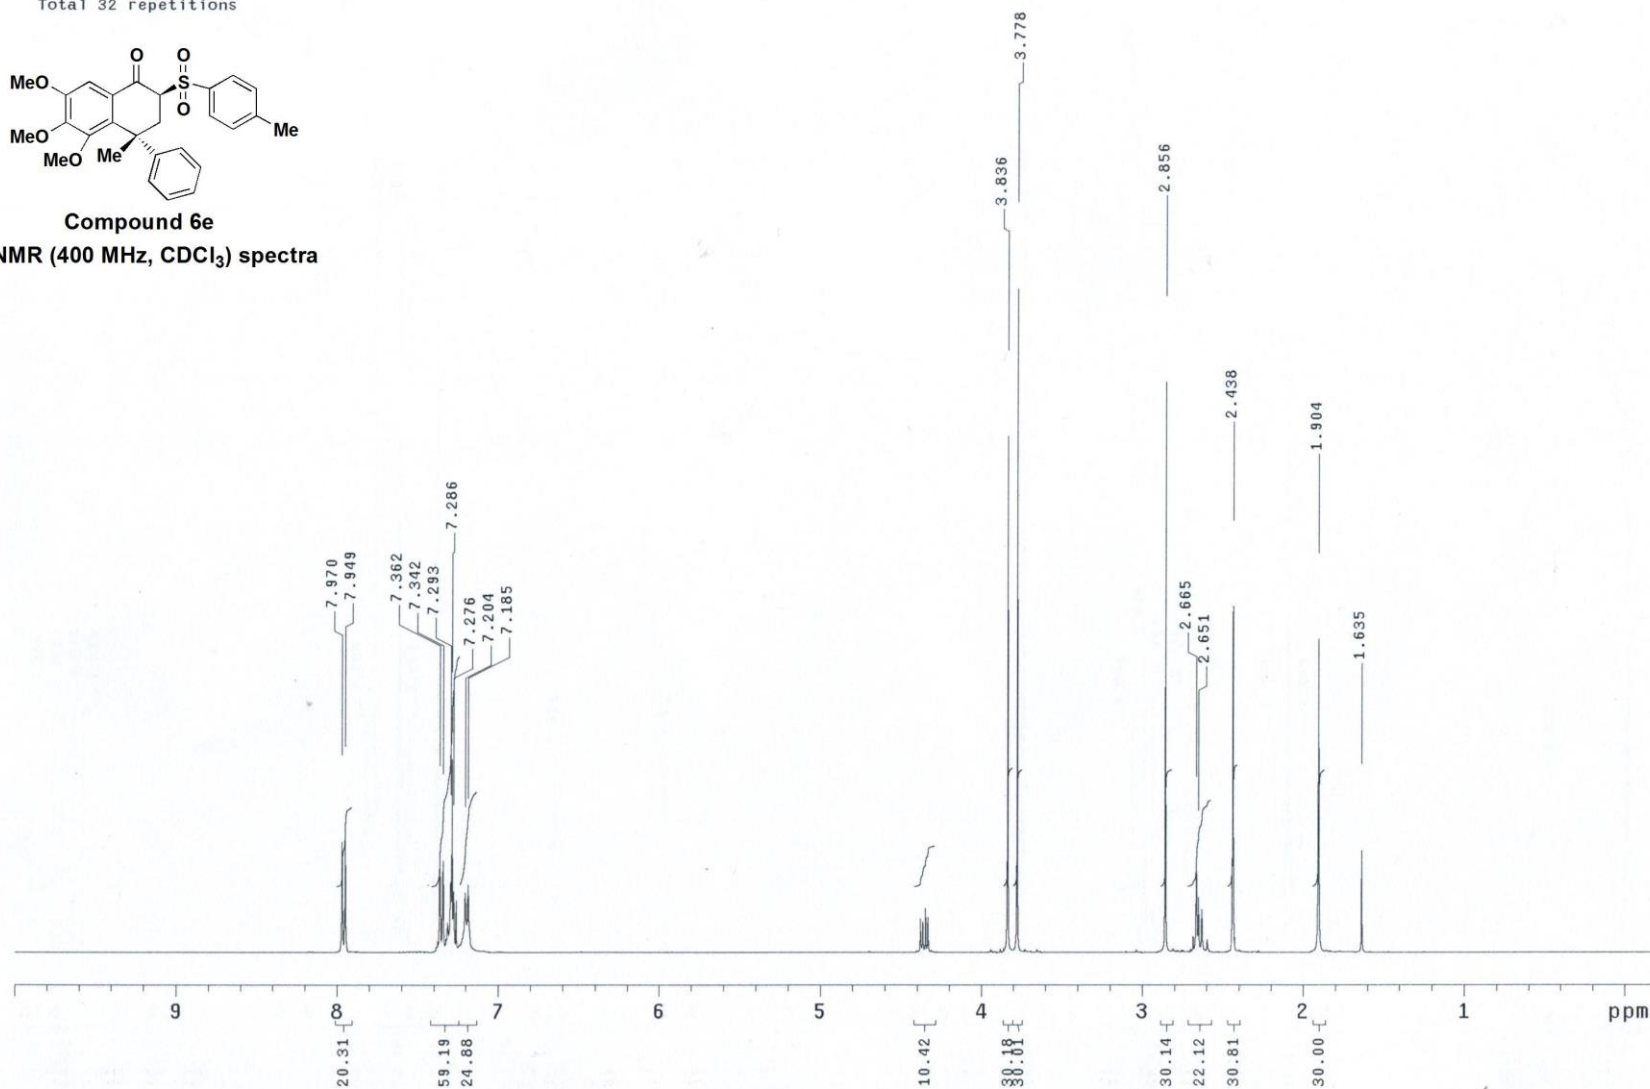

# Compound 6e (<sup>1</sup>H-NMR spectral data-2)

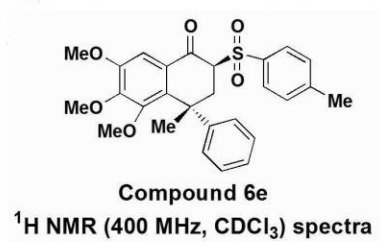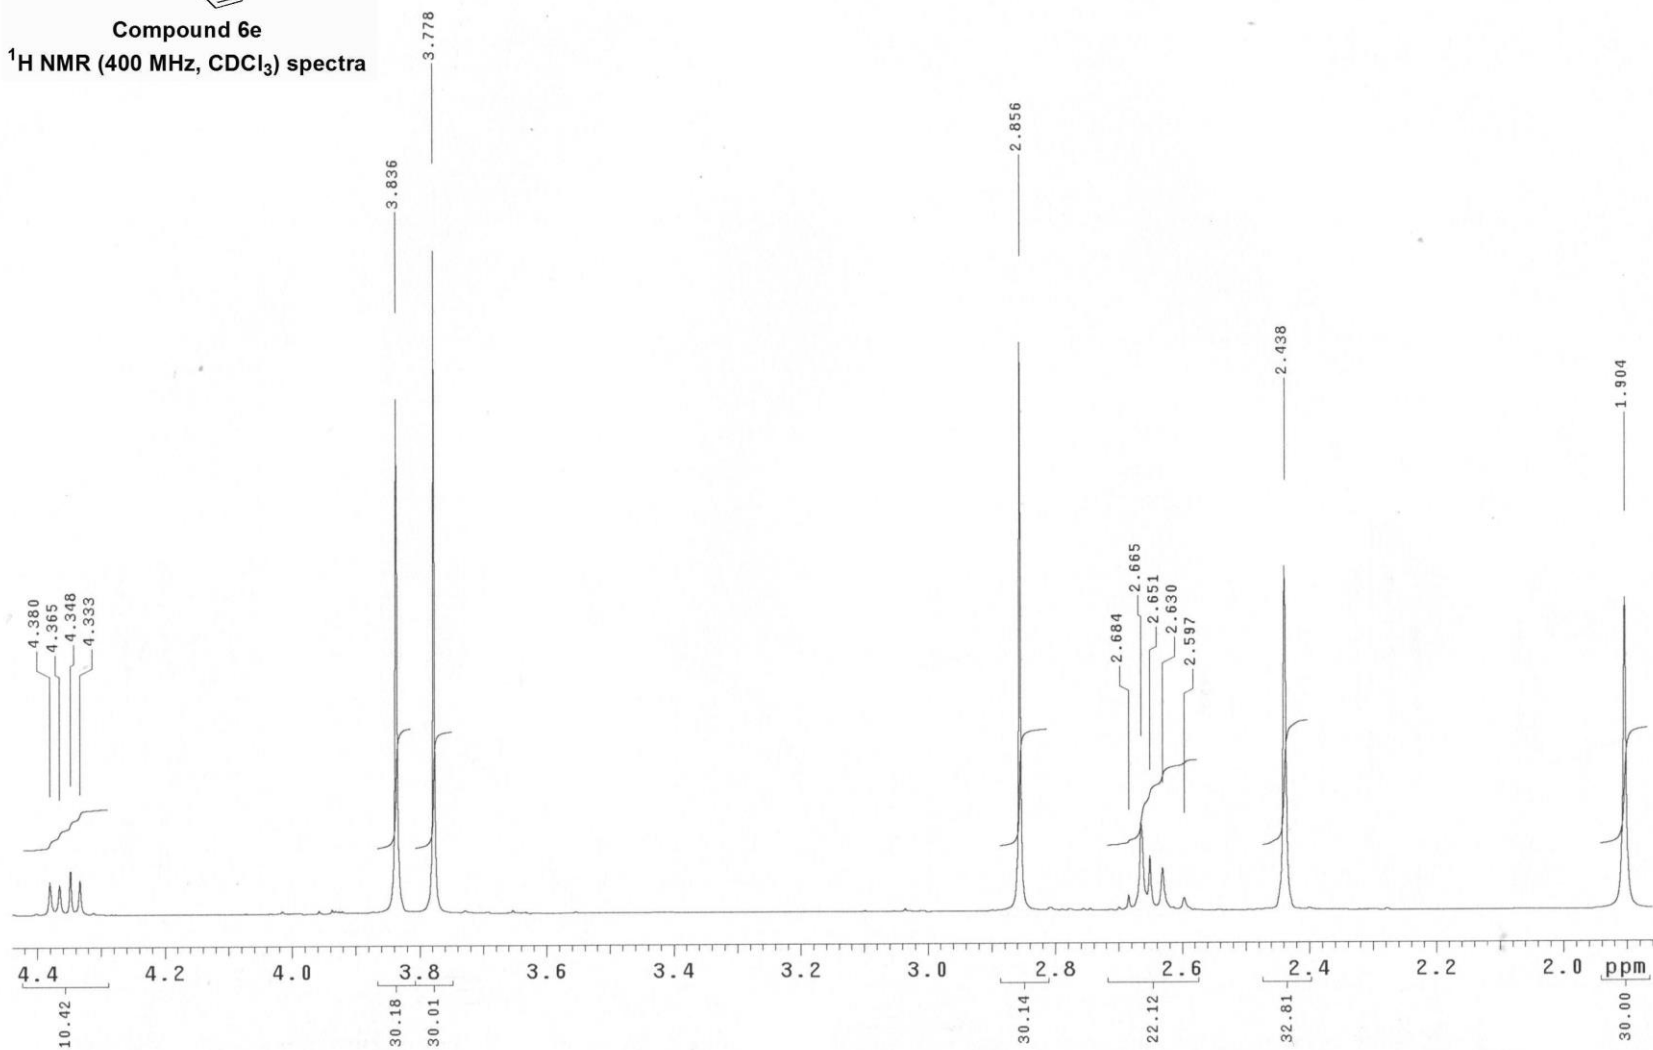

# Compound 6e (<sup>13</sup>C-NMR spectral data)

KS3Me0BF

Pulse Sequence: s2pu1  
 UNITYplus-400 "unity400"  
 Date: Mar 11 2019  
 Solvent: CDCl<sub>3</sub>  
 Ambient temperature  
 Total 640 repetitions

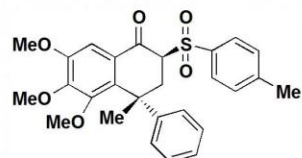

Compound 6e

<sup>13</sup>C NMR (100 MHz, CDCl<sub>3</sub>) spectra

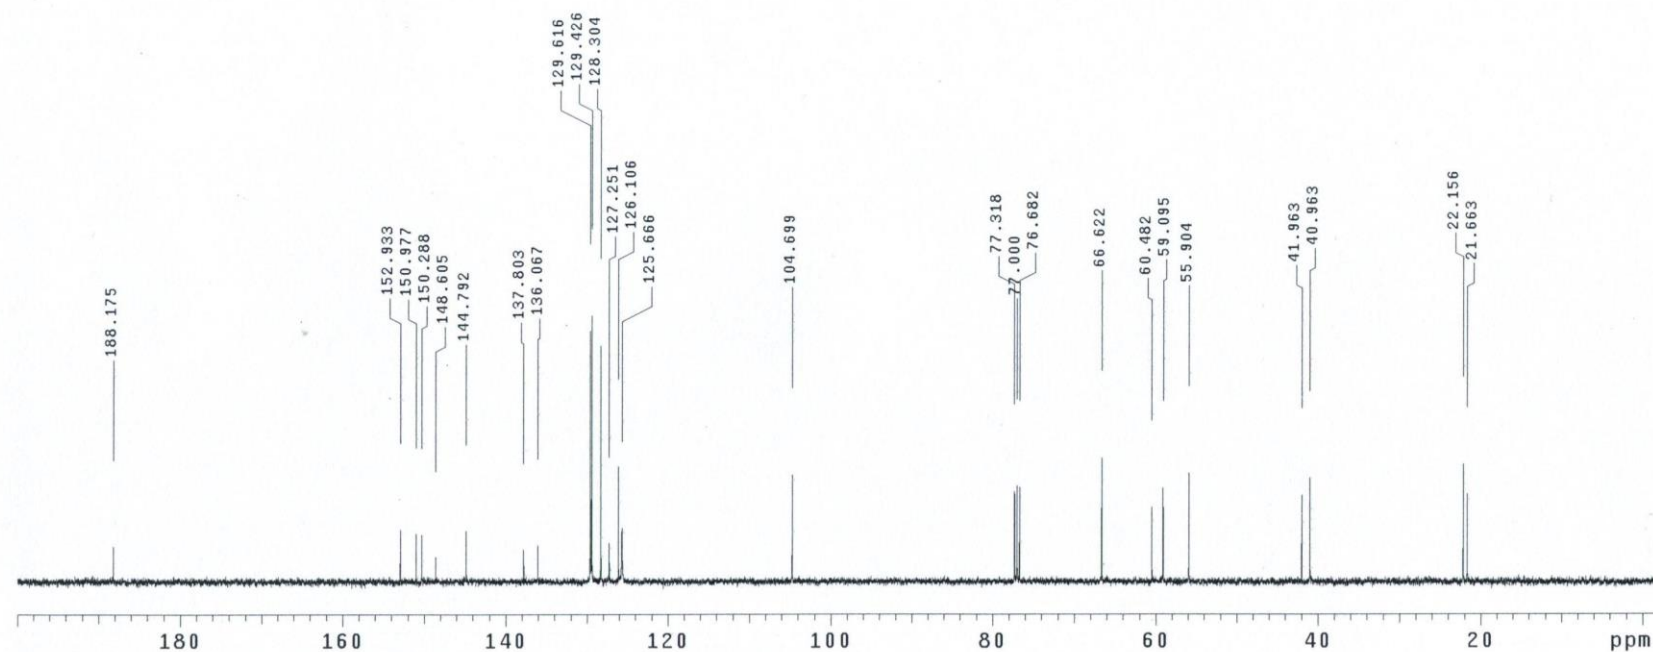

# Compound 7a (<sup>1</sup>H-NMR spectral data-1)

KSTScrBF

Pulse Sequence: s2pu1

UNITYplus-400 "unity400"

Date: Jan 17 2019

Solvent: CDCl<sub>3</sub>

Ambient temperature

Total 32 repetitions

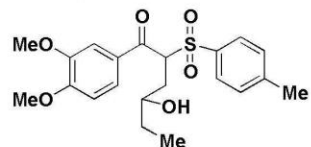

Compound 7a

<sup>1</sup>H NMR (400 MHz, CDCl<sub>3</sub>) spectra

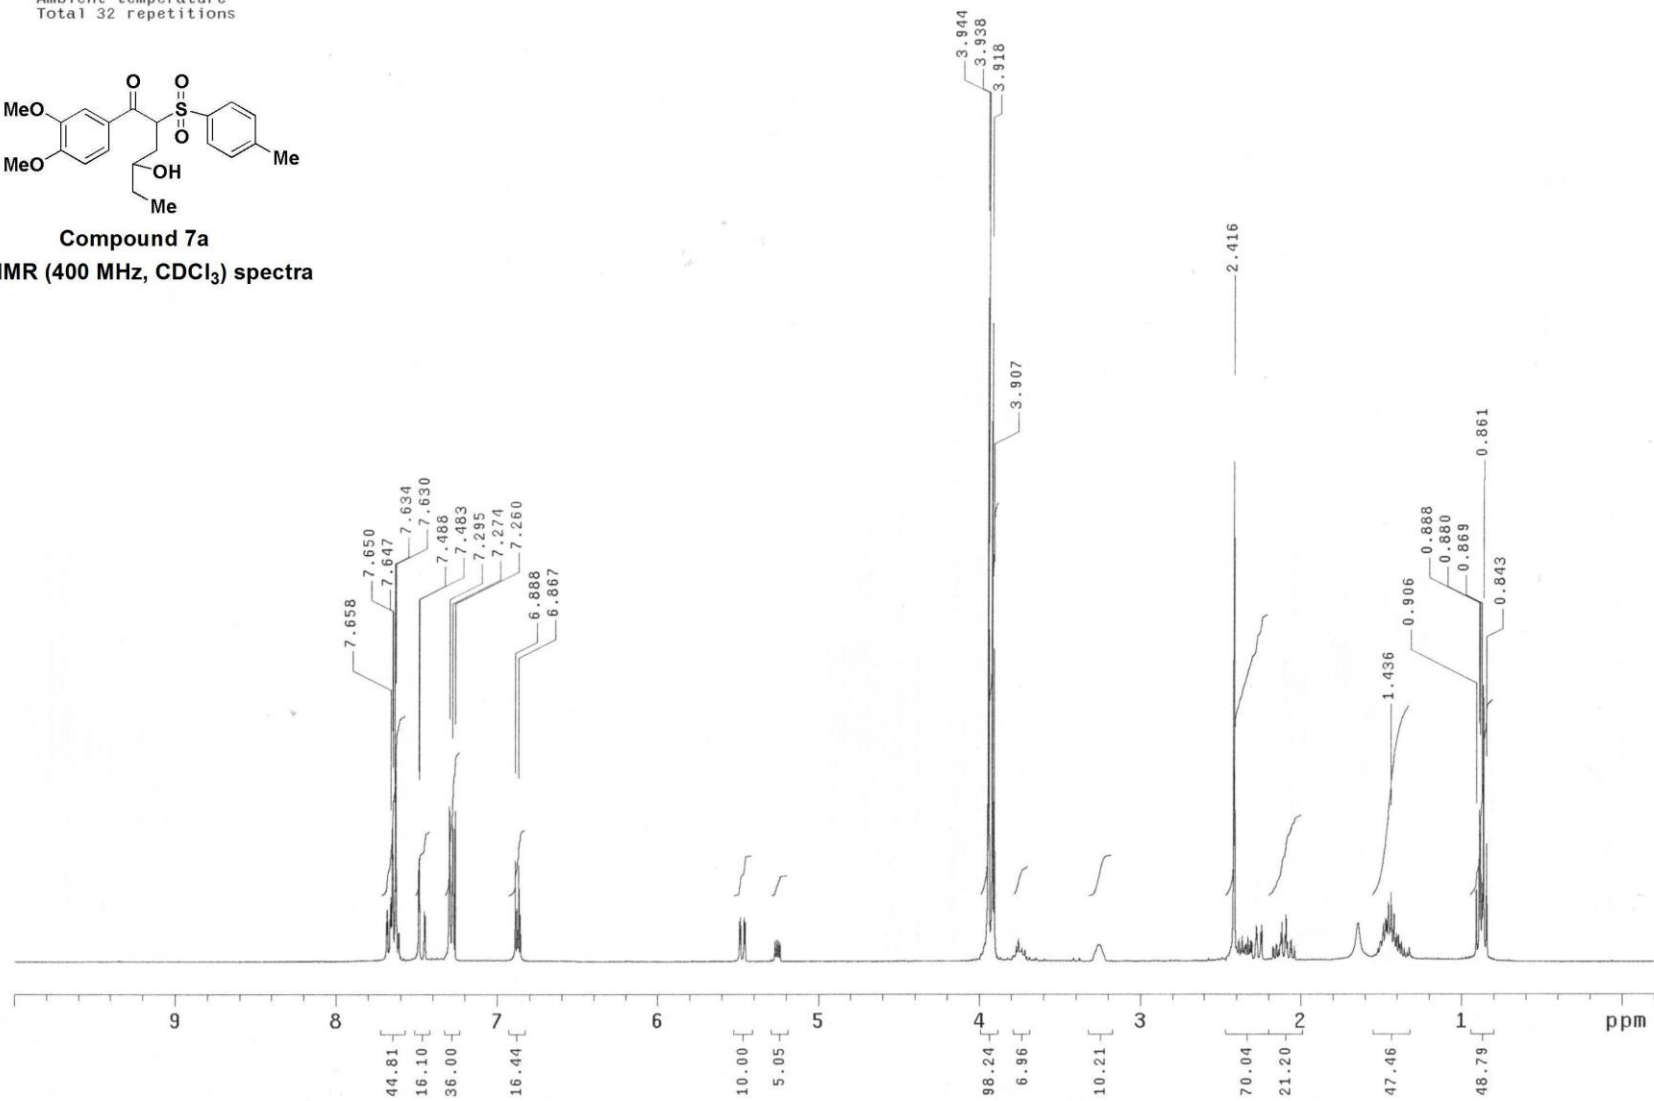

# Compound 7a (<sup>1</sup>H-NMR spectral data-2)

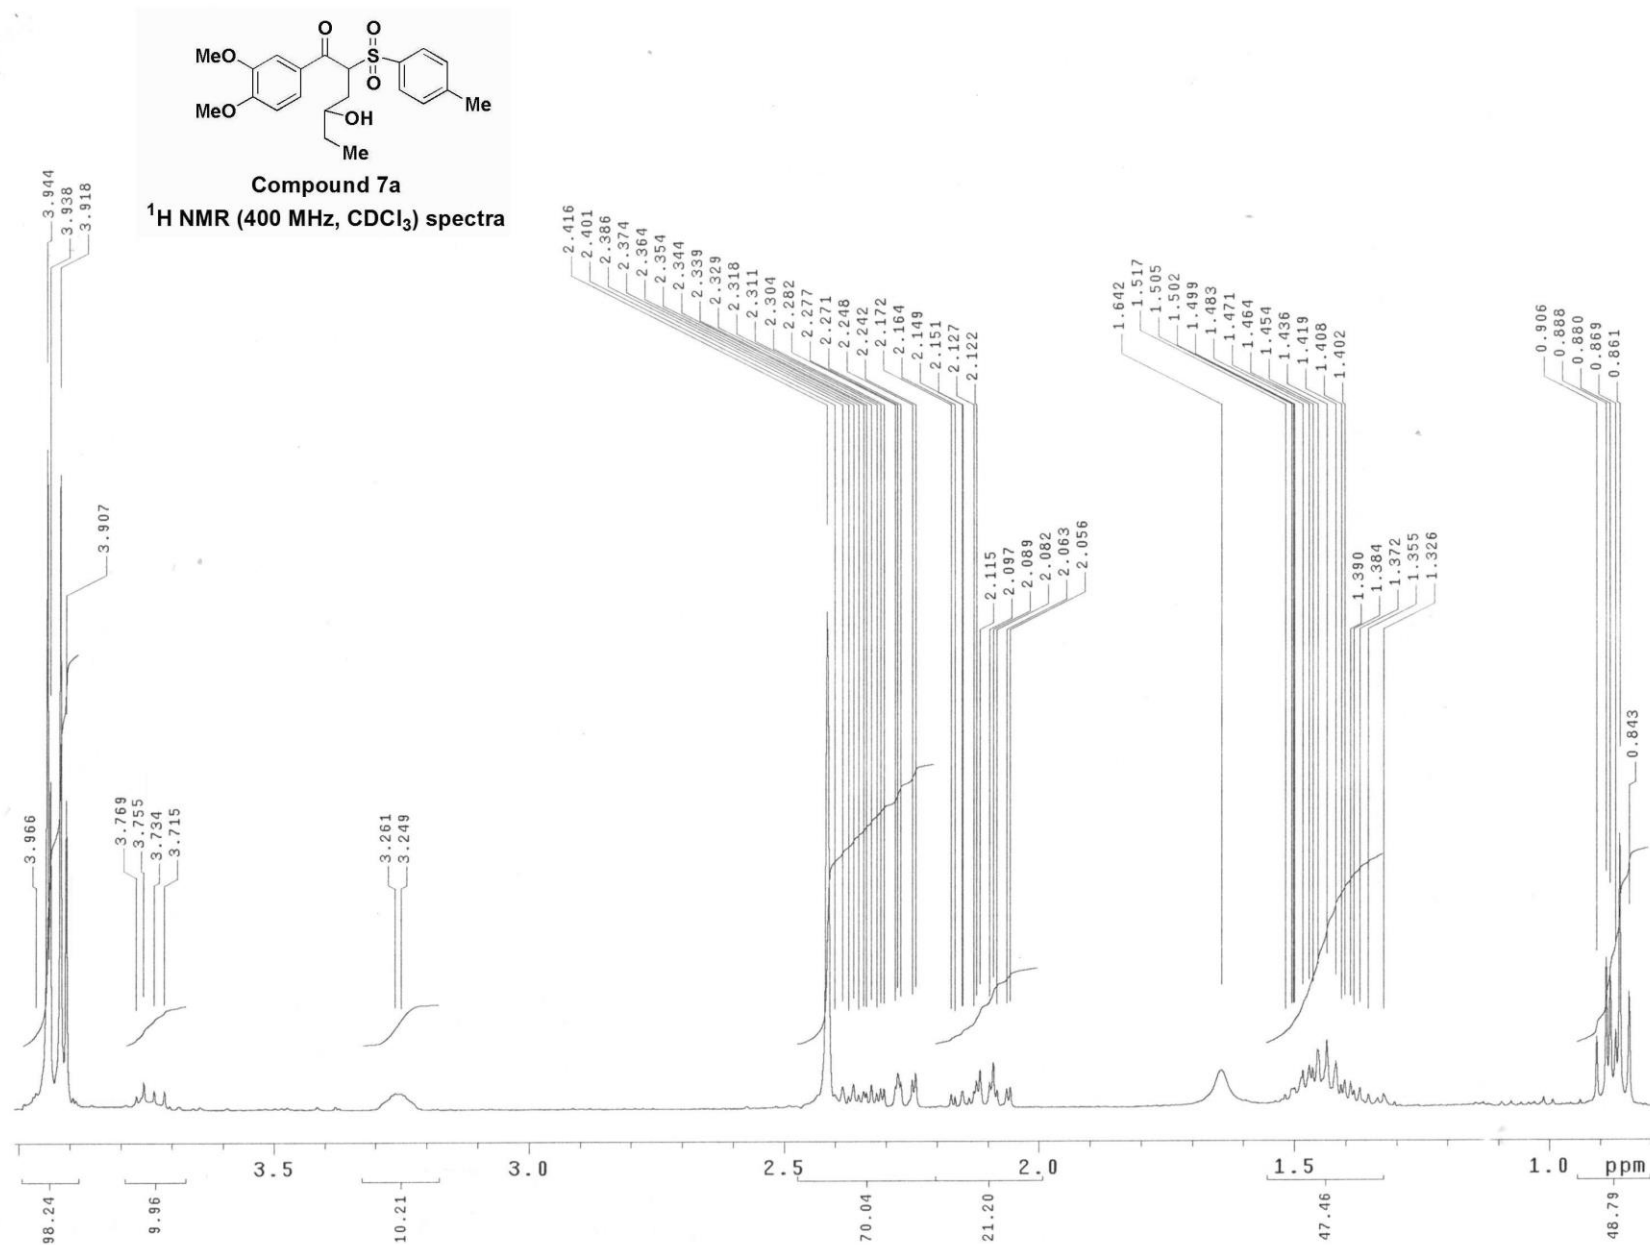

# Compound 7a (<sup>1</sup>H-NMR spectral data-3)

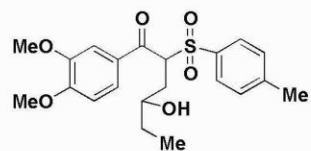

Compound 7a

<sup>1</sup>H NMR (400 MHz, CDCl<sub>3</sub>) spectra

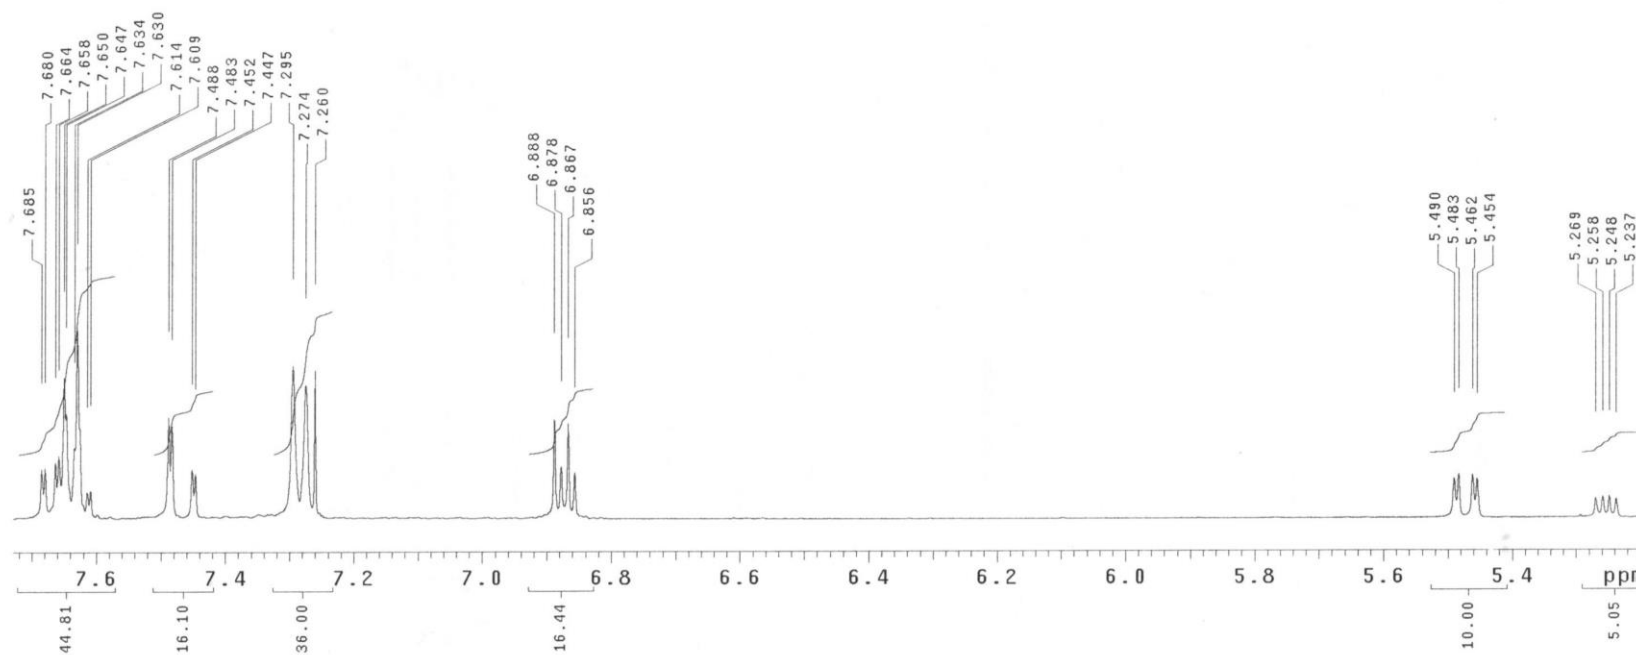

# Compound 7a (<sup>13</sup>C-NMR spectral data)

KSTSCrBF

Pulse Sequence: s2pu1  
 UNITYplus-400 "unity400"  
 Date: Jan 17 2019  
 Solvent: CDCl<sub>3</sub>  
 Ambient temperature  
 Total 32000 repetitions

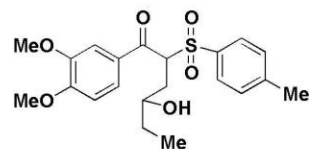

Compound 7a

<sup>13</sup>C NMR (100 MHz, CDCl<sub>3</sub>) spectra

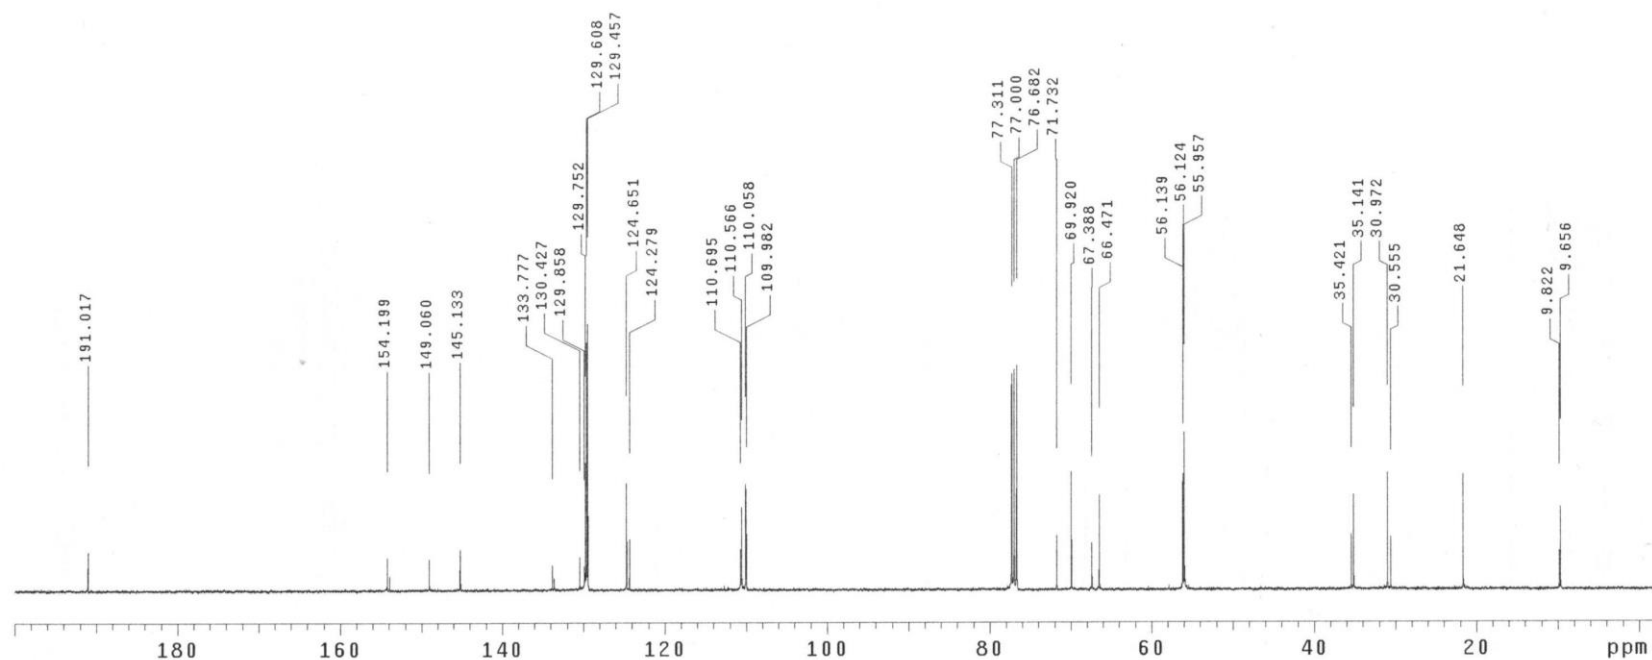

# Compound 7b (<sup>1</sup>H-NMR spectral data-1)

KSFCrBF

Pulse Sequence: s2pu1  
 UNITYplus-400 "unity400"  
 Date: Dec 27 2018  
 Solvent: CDCl<sub>3</sub>  
 Ambient temperature  
 Total 32 repetitions

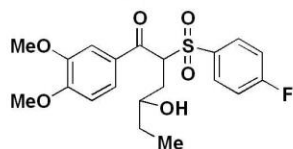

Compound 7b

<sup>1</sup>H NMR (400 MHz, CDCl<sub>3</sub>) spectra

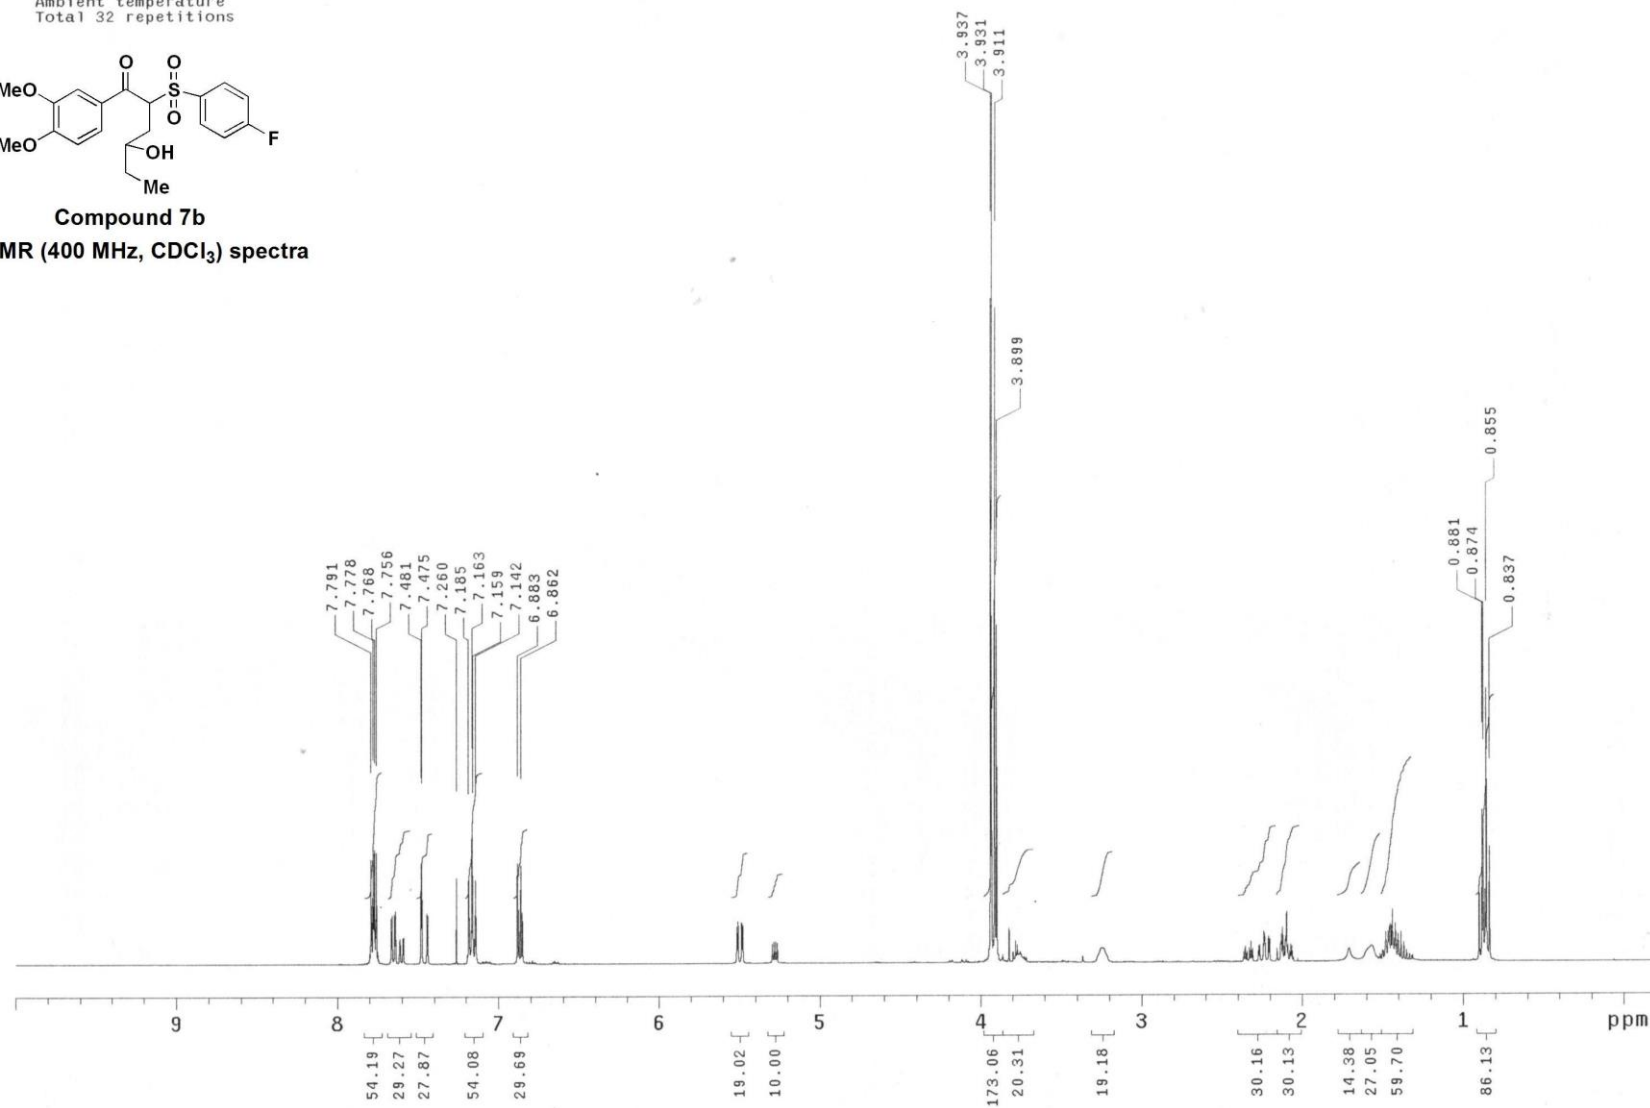

# Compound 7b (<sup>1</sup>H-NMR spectral data-2)

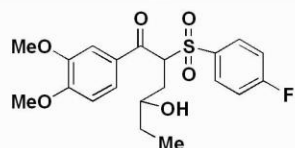

Compound 7b

<sup>1</sup>H NMR (400 MHz, CDCl<sub>3</sub>) spectra

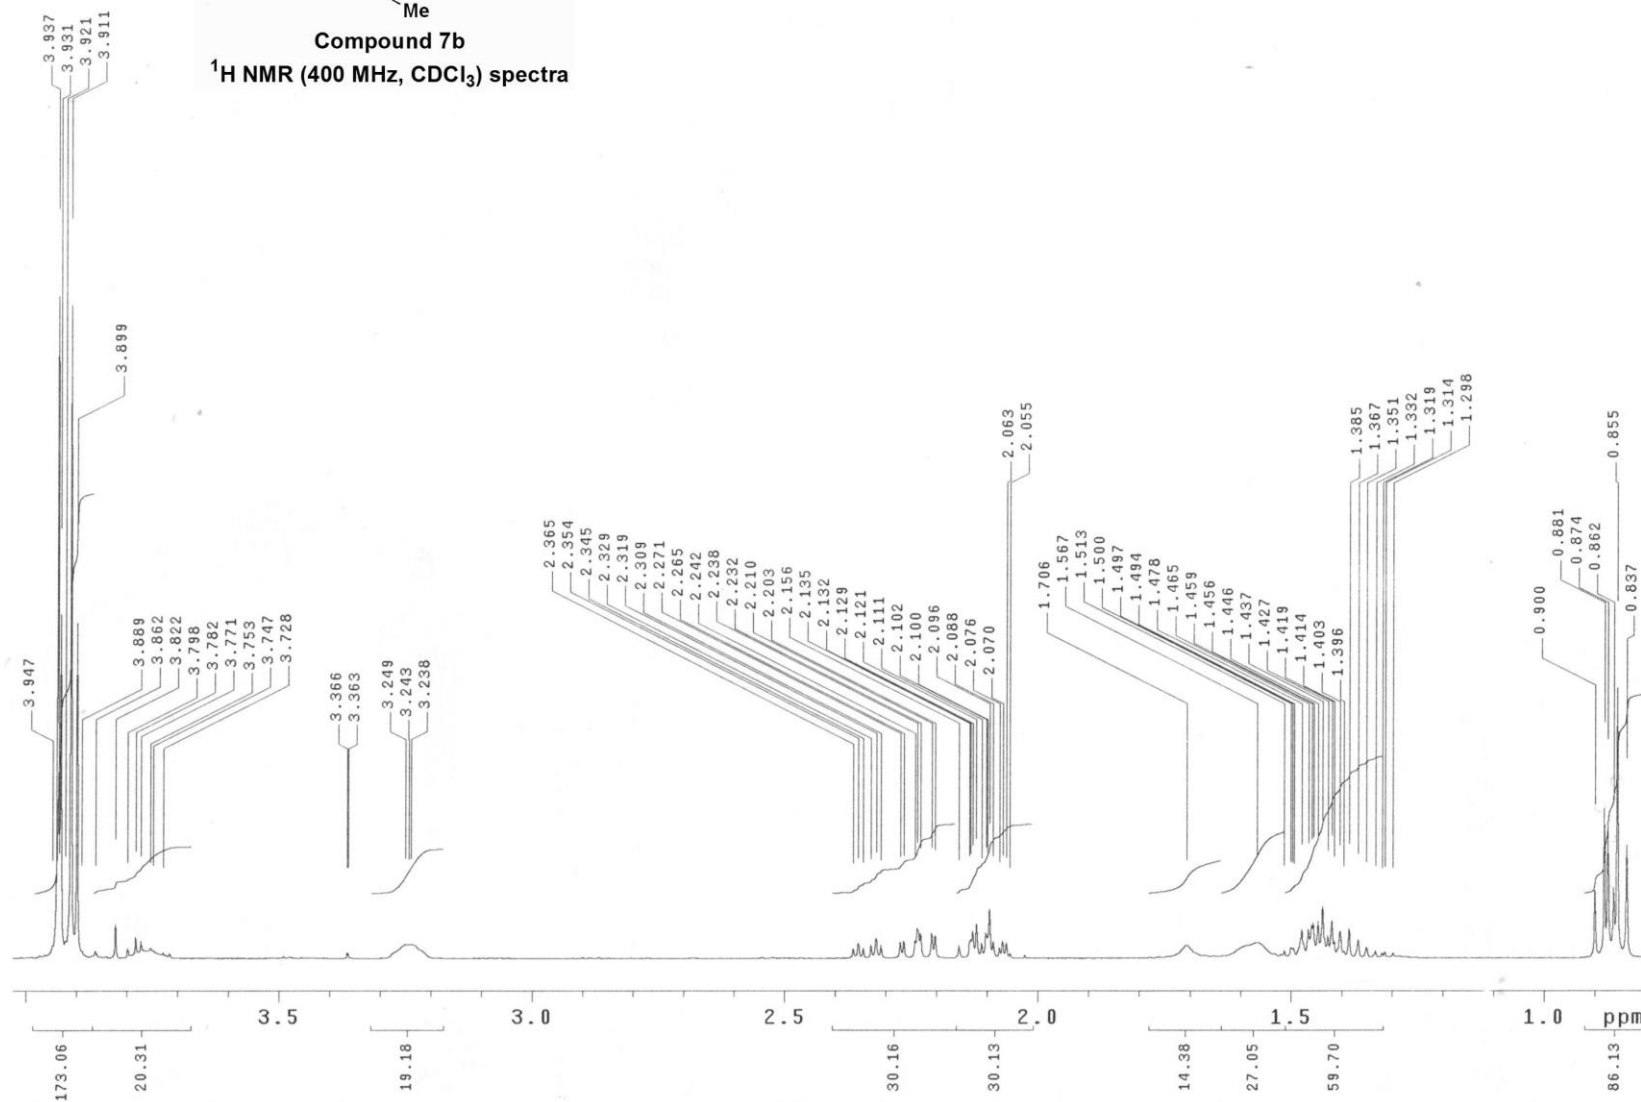

# Compound 7b (<sup>1</sup>H-NMR spectral data-3)

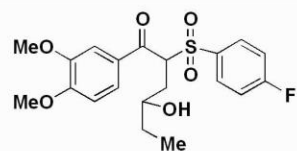

Compound 7b

<sup>1</sup>H NMR (400 MHz, CDCl<sub>3</sub>) spectra

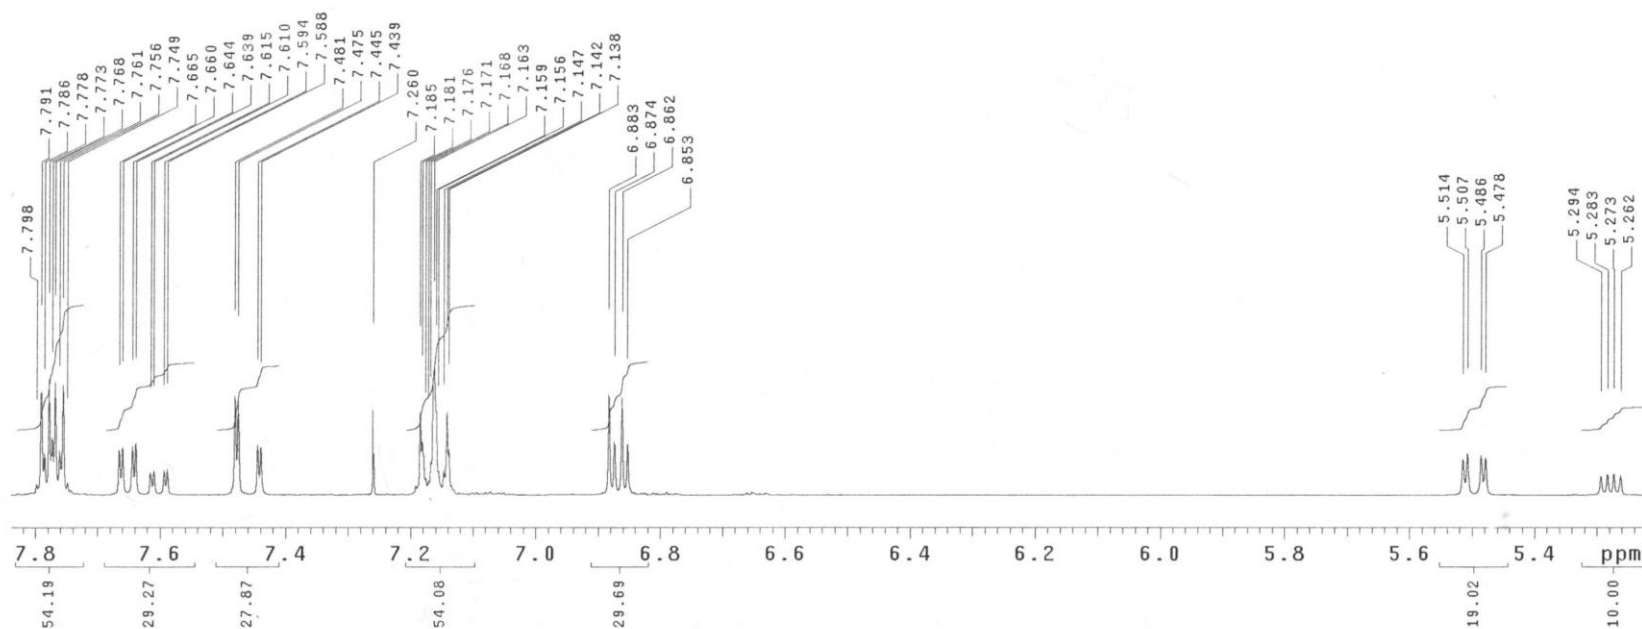

# Compound 7b (<sup>13</sup>C-NMR spectral data)

KSFCrBF

Pulse Sequence: s2pu1  
 UNITYplus-400 "unity400"  
 Date: Dec 27 2018  
 Solvent: CDCl<sub>3</sub>  
 Ambient temperature  
 Total 1024 repetitions

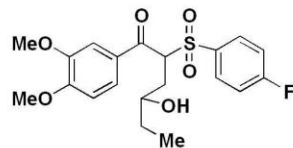

Compound 7b

<sup>13</sup>C NMR (100 MHz, CDCl<sub>3</sub>) spectra

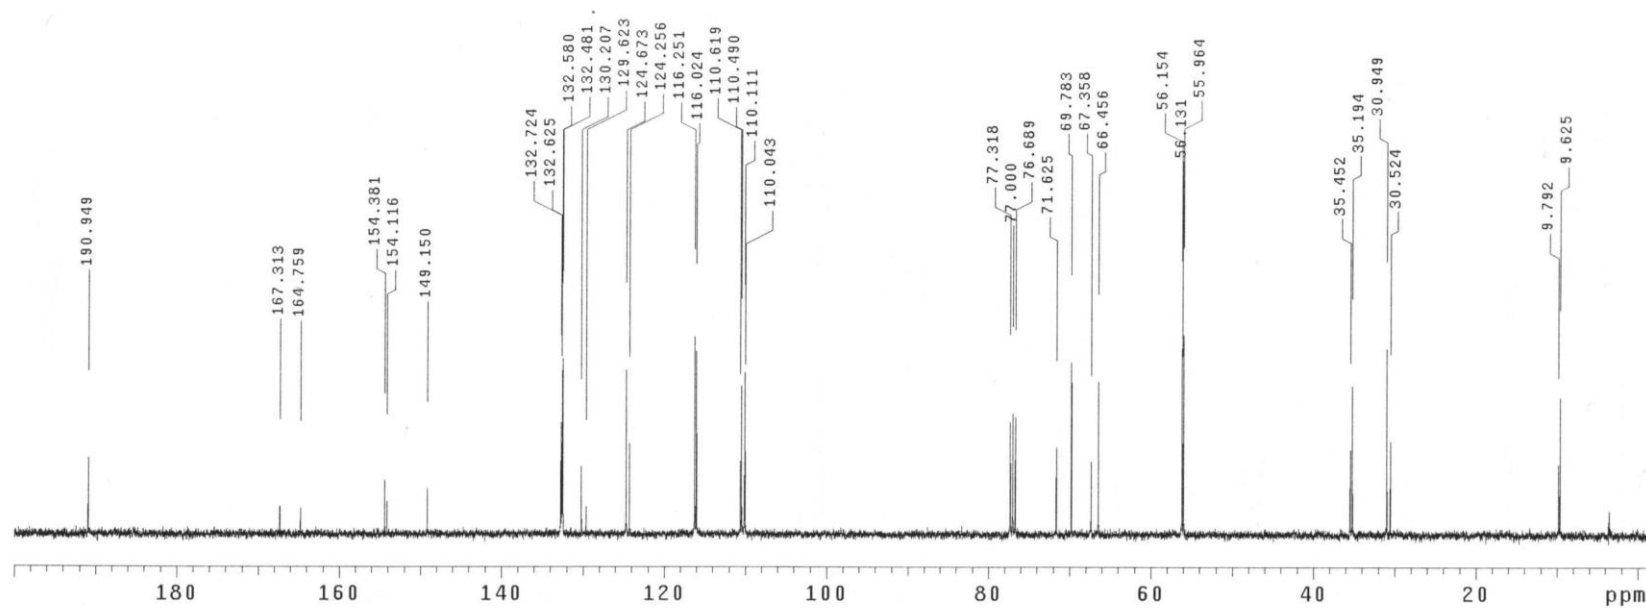

# Compound 7c (<sup>1</sup>H-NMR spectral data-1)

KSOMeCrBF

Pulse Sequence: s2pu1

UNITYplus-400 "unity400"

Date: Jan 14 2019

Solvent: CDCl<sub>3</sub>

Ambient temperature

Total 32 repetitions

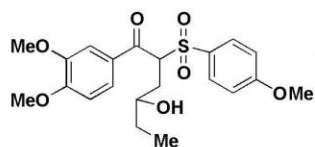

Compound 7c

<sup>1</sup>H NMR (400 MHz, CDCl<sub>3</sub>) spectra

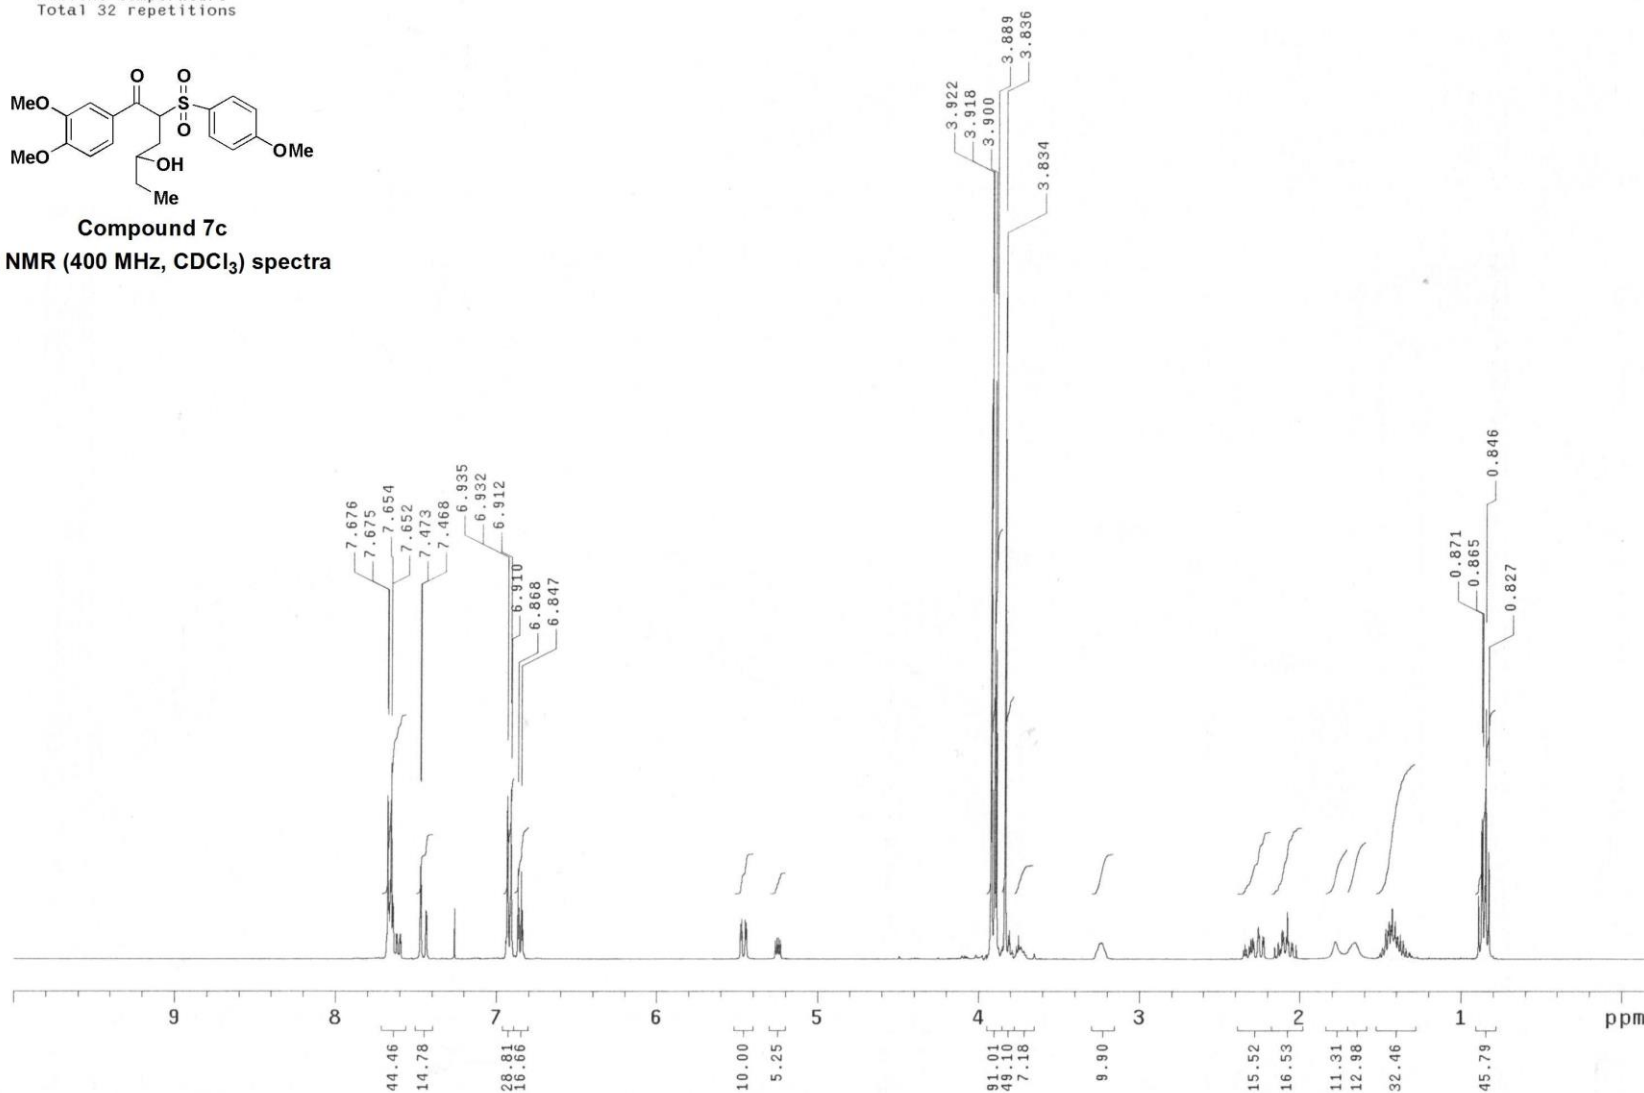

# Compound 7c (<sup>1</sup>H-NMR spectral data-2)

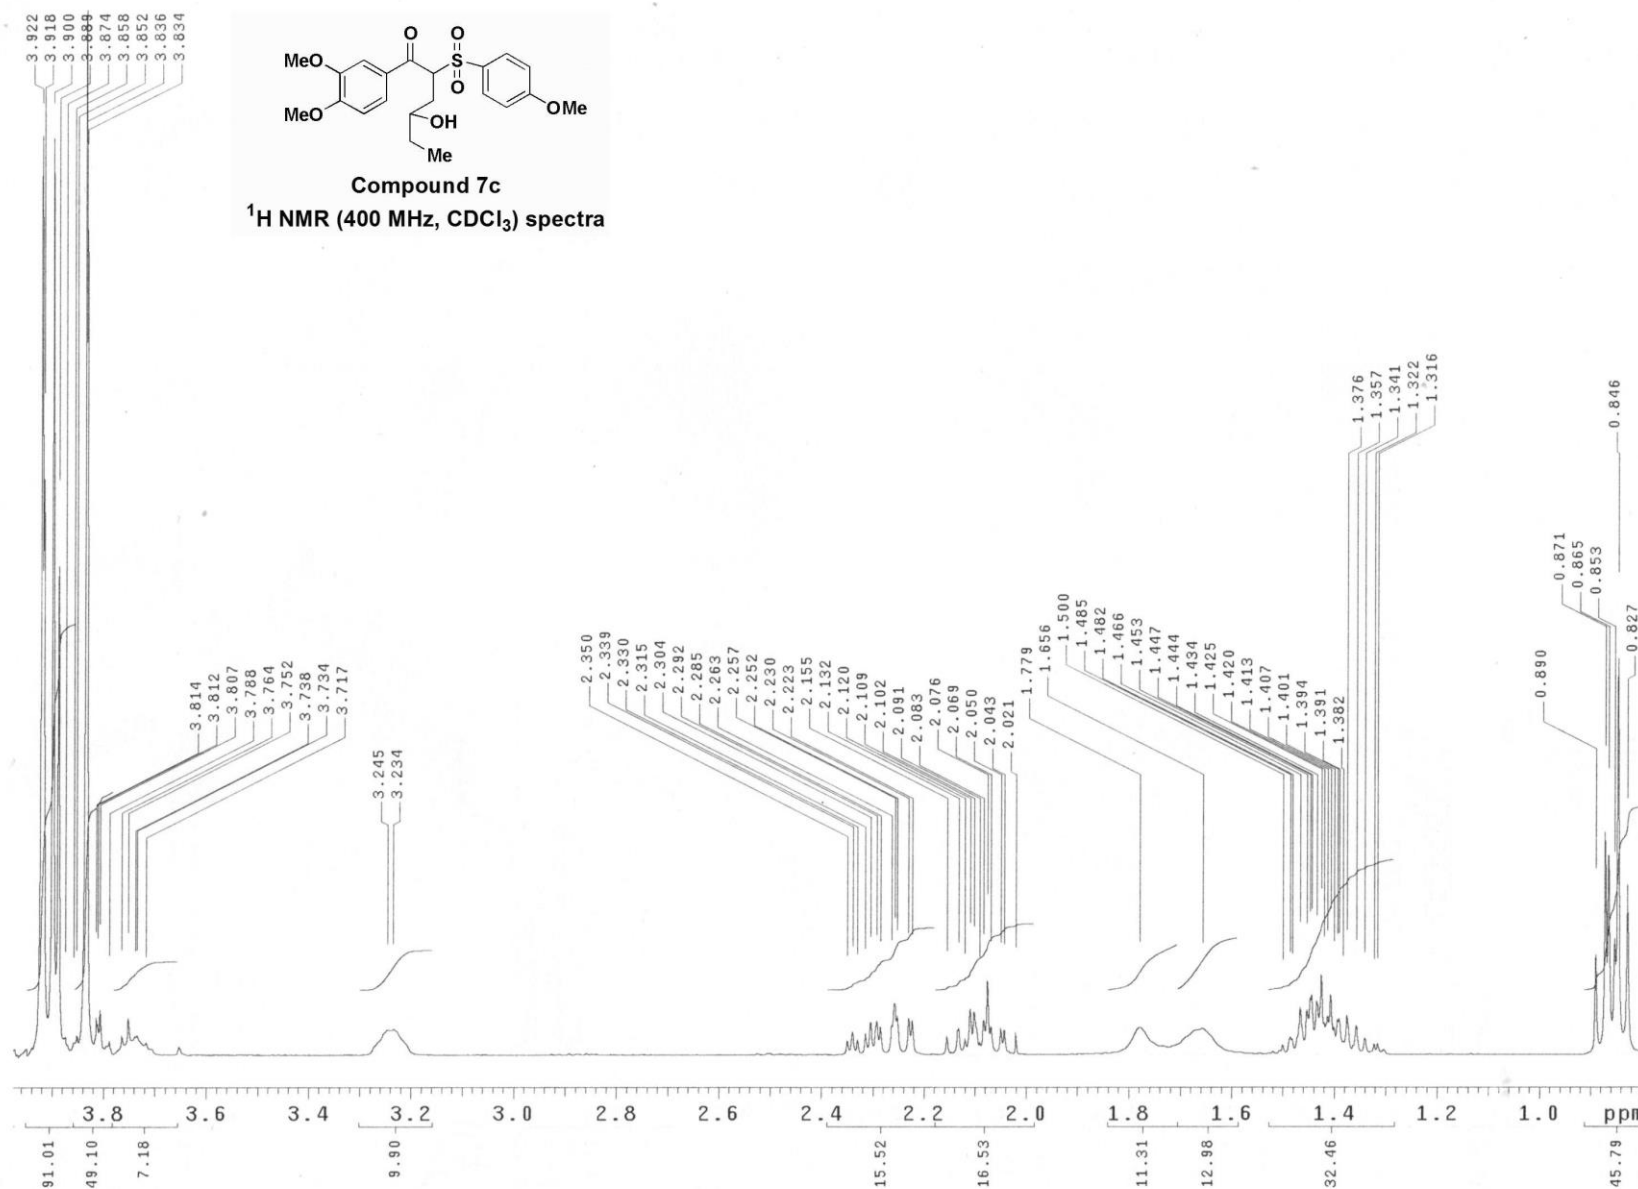

# Compound 7c (<sup>1</sup>H-NMR spectral data-3)

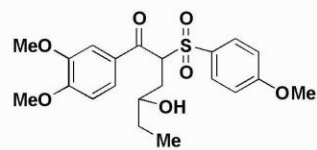

Compound 7c

<sup>1</sup>H NMR (400 MHz, CDCl<sub>3</sub>) spectra

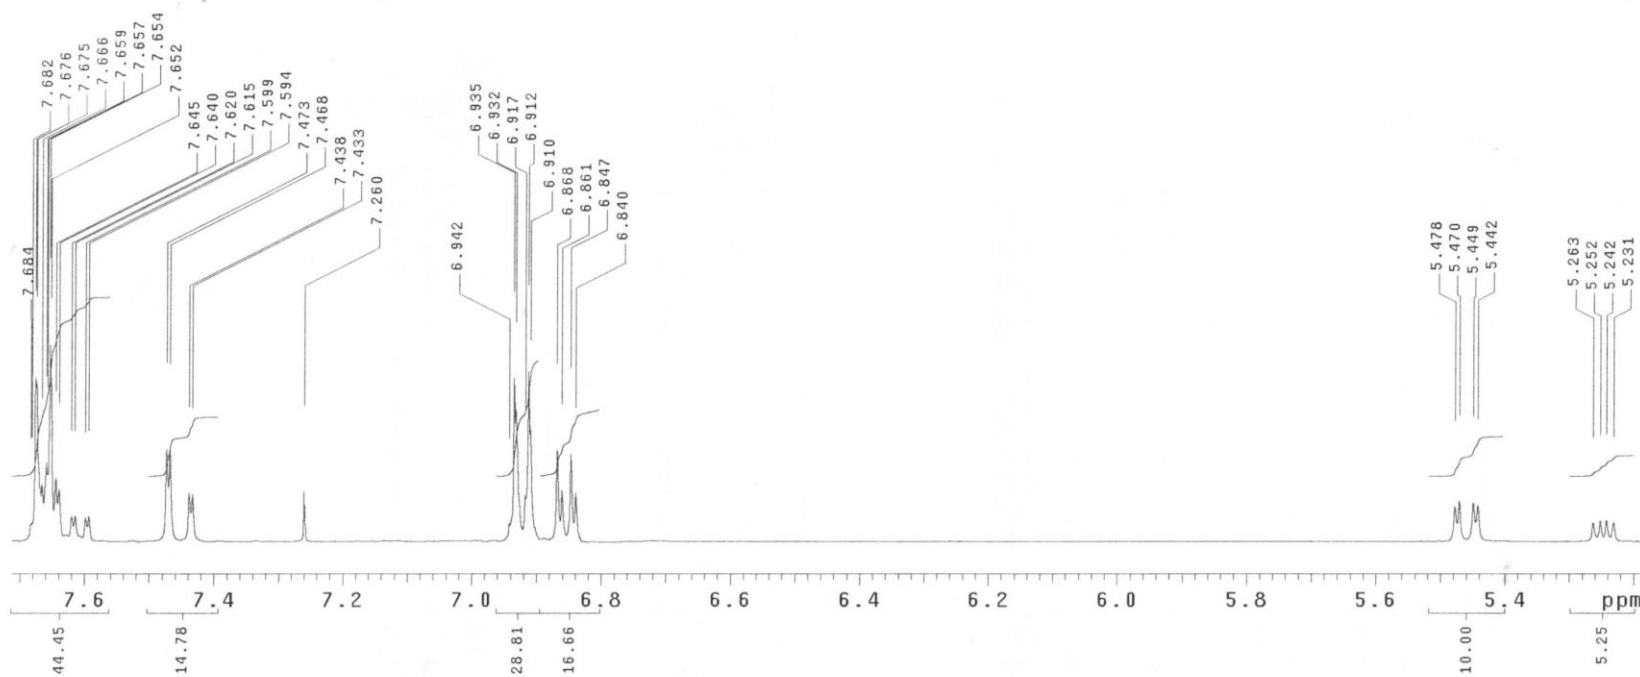

# Compound 7c (<sup>13</sup>C-NMR spectral data)

KSOMeCrBF

Pulse Sequence: s2pu1

UNITYplus-400 "unity400"

Date: Jan 14 2019

Solvent: CDCl<sub>3</sub>

Ambient temperature

Total 1056 repetitions

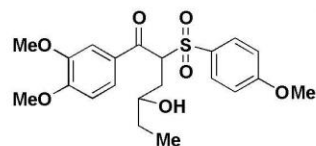

Compound 7c

<sup>13</sup>C NMR (100 MHz, CDCl<sub>3</sub>) spectra

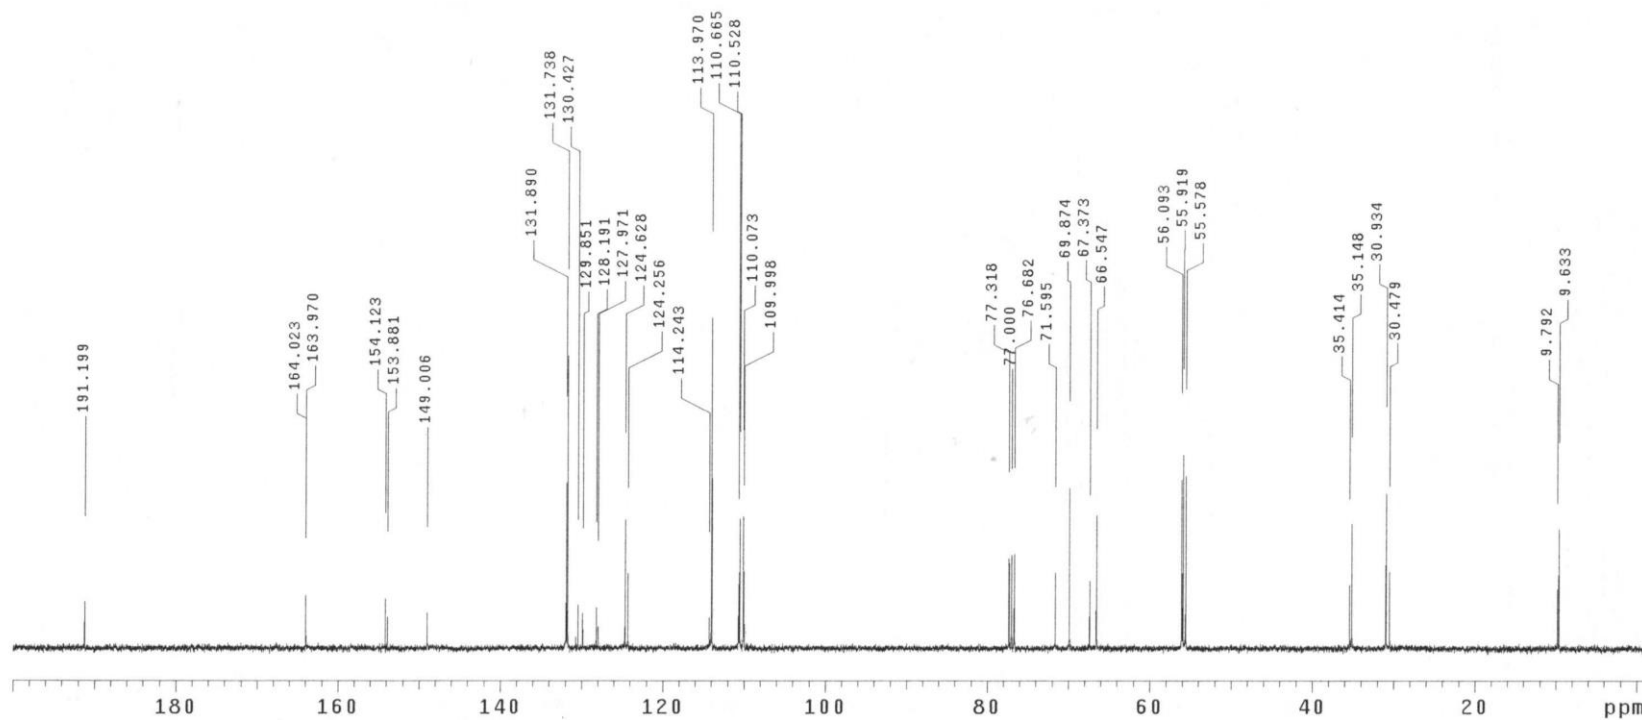

# Compound 7d (<sup>1</sup>H-NMR spectral data-1)

KSPbBuCrBF

Pulse Sequence: s2pu1

UNITYplus-400 "unity400"

Date: Jan 11 2019

Solvent: CDCl<sub>3</sub>

Ambient temperature

Total 32 repetitions

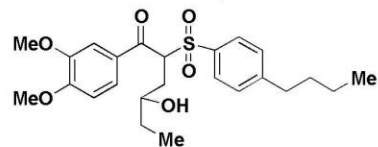

Compound 7d

<sup>1</sup>H NMR (400 MHz, CDCl<sub>3</sub>) spectra

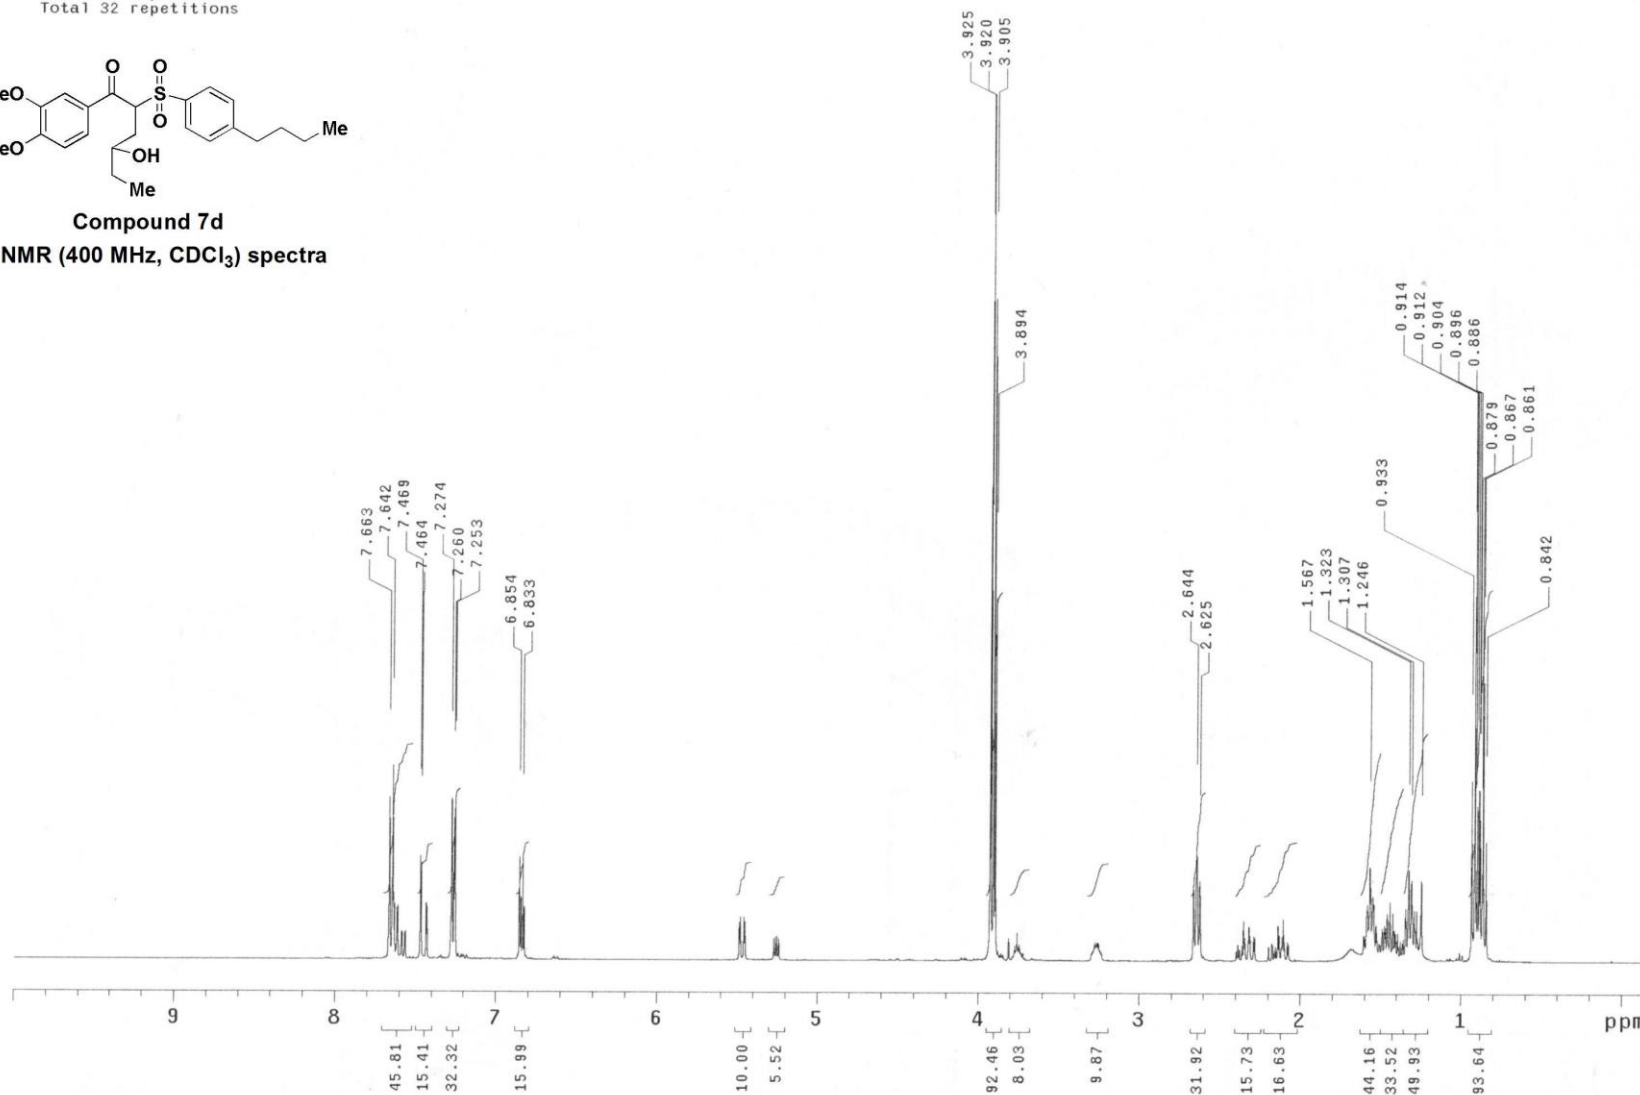

# Compound 7d (<sup>1</sup>H-NMR spectral data-2)

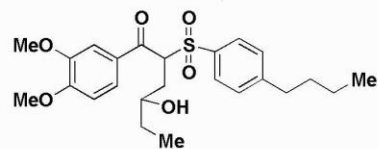

Compound 7d

<sup>1</sup>H NMR (400 MHz, CDCl<sub>3</sub>) spectra

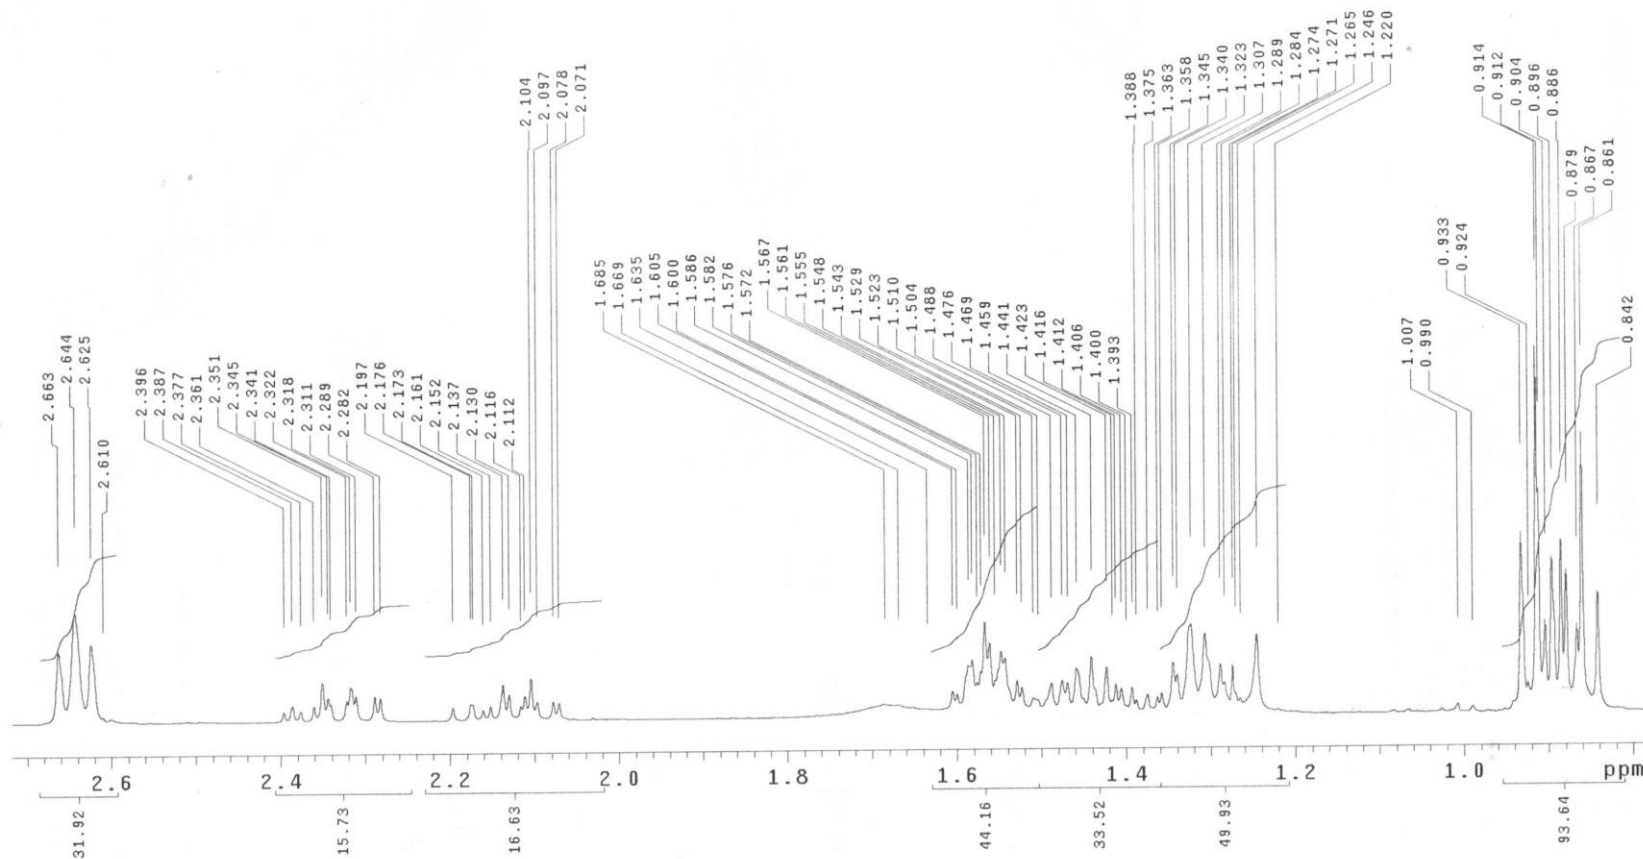

# Compound 7d (<sup>1</sup>H-NMR spectral data-3)

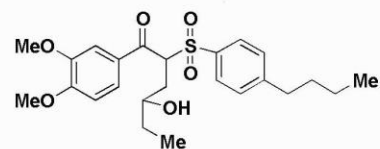

Compound 7d

<sup>1</sup>H NMR (400 MHz, CDCl<sub>3</sub>) spectra

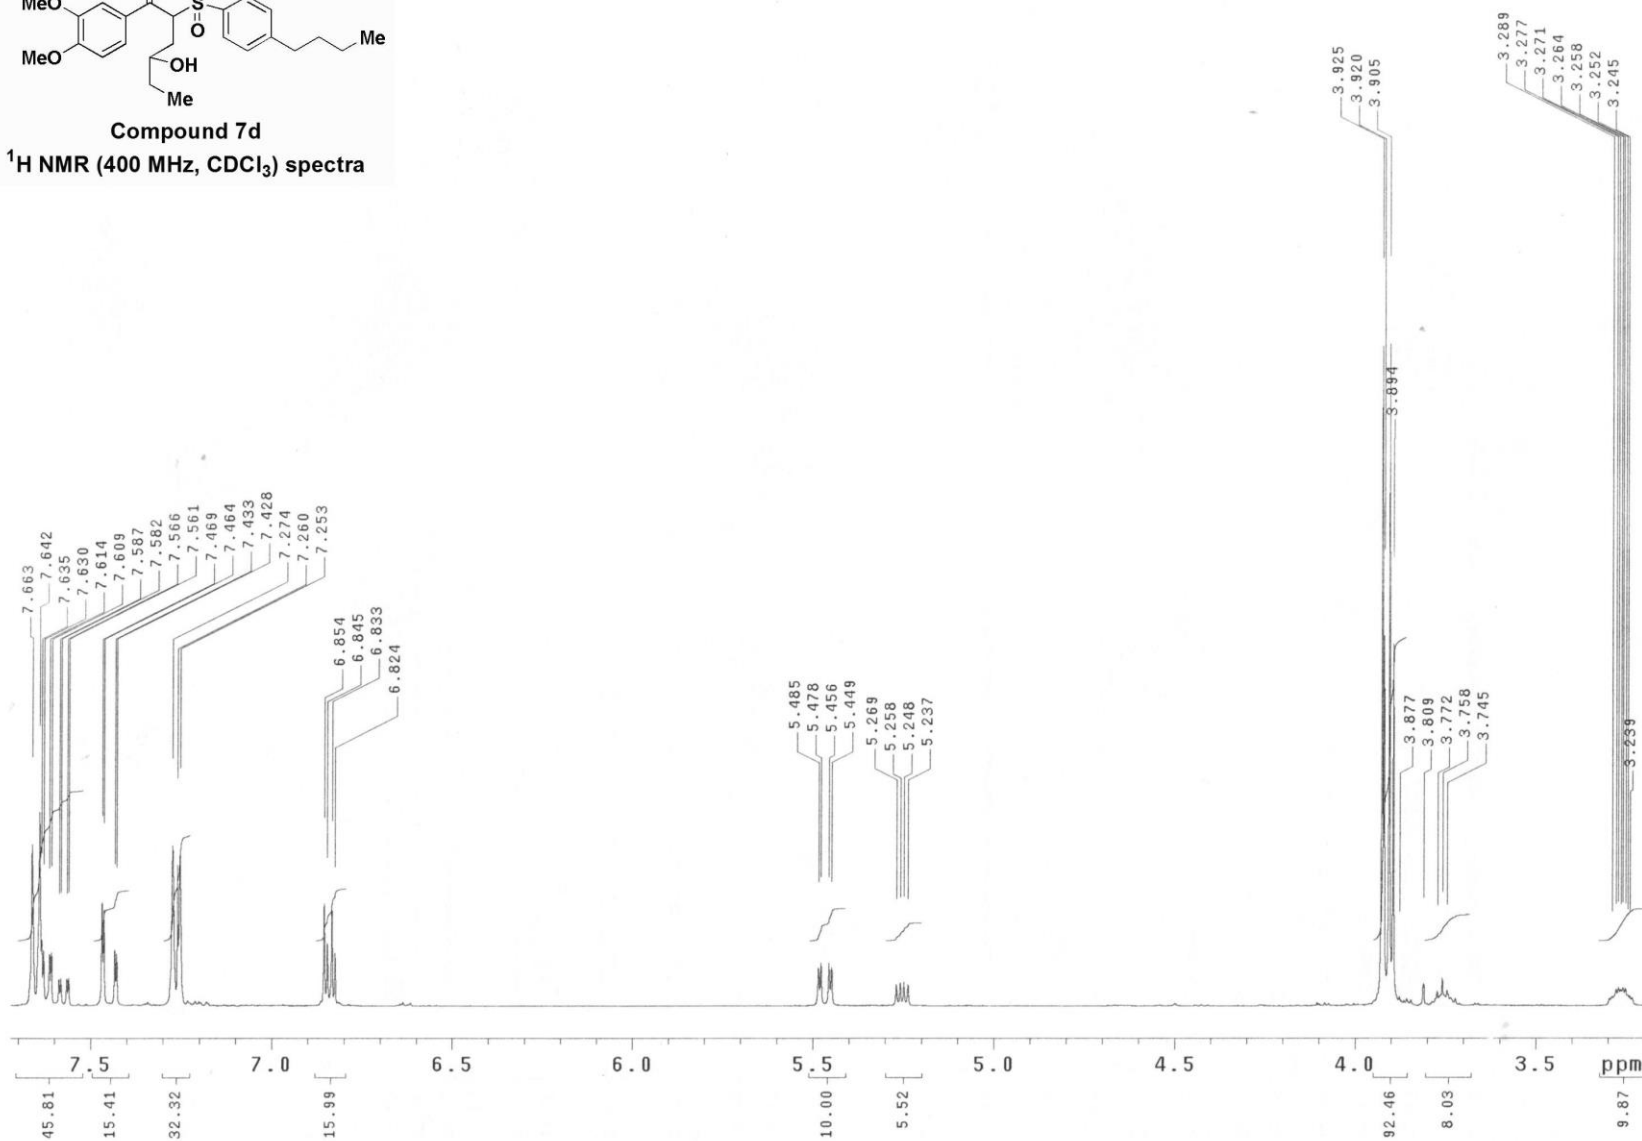

# Compound 7d (<sup>13</sup>C-NMR spectral data)

KSPbBuCrBF

Pulse Sequence: s2pu1

UNITYplus-400 "unity400"

Date: Jan 11 2019

Solvent: CDCl<sub>3</sub>

Ambient temperature

Total 1280 repetitions

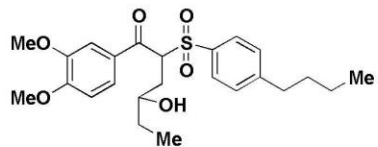

Compound 7d

<sup>13</sup>C NMR (100 MHz, CDCl<sub>3</sub>) spectra

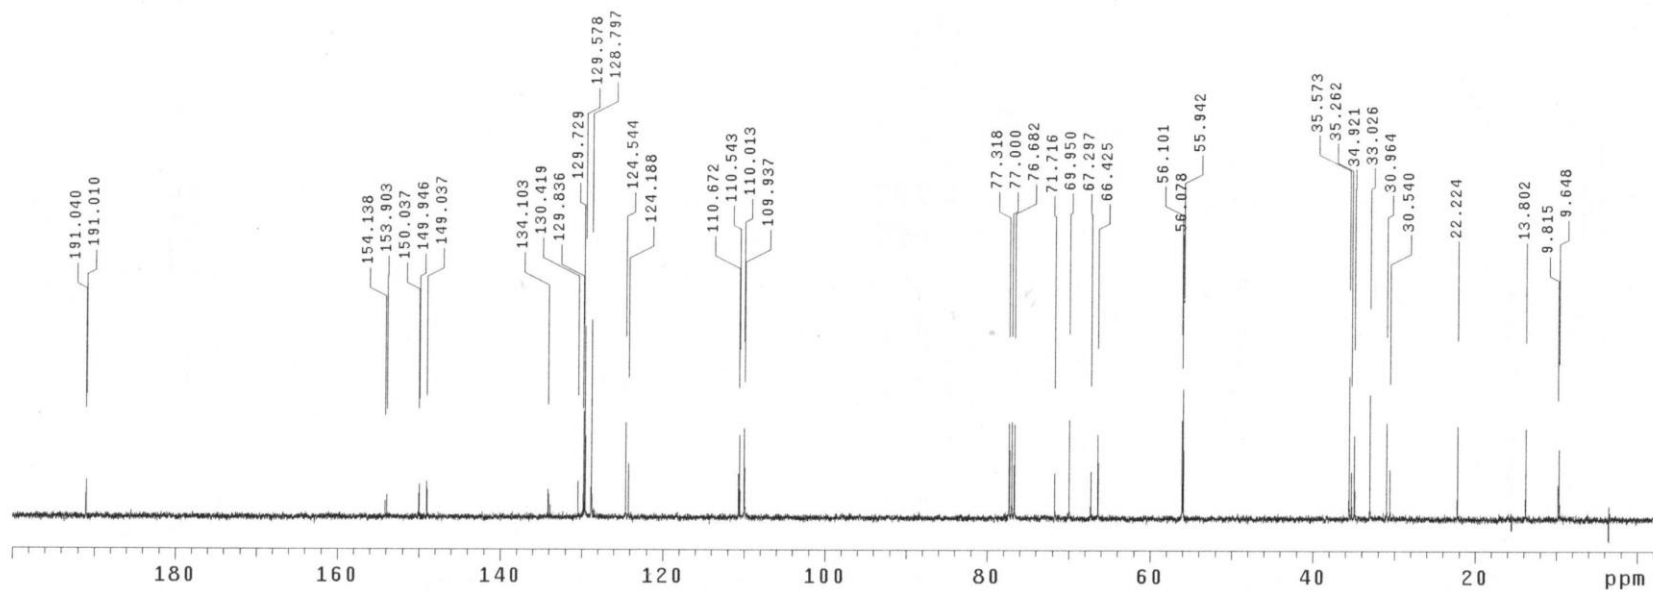

# Compound 10a (<sup>1</sup>H-NMR spectral data-1)

Kuo1009

Pulse Sequence: s2pu1

UNITYplus-400 "unity400"

Date: Nov 6 2015

Solvent: CDCl<sub>3</sub>

Ambient temperature

Total 64 repetitions

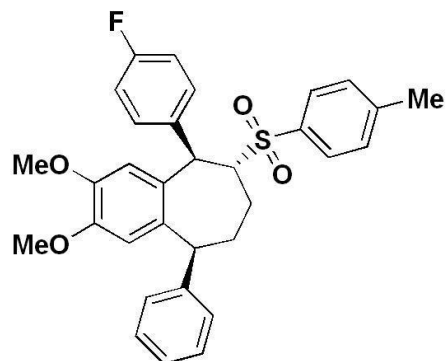

Compound 10a

<sup>1</sup>H NMR (400 MHz, CDCl<sub>3</sub>) spectra

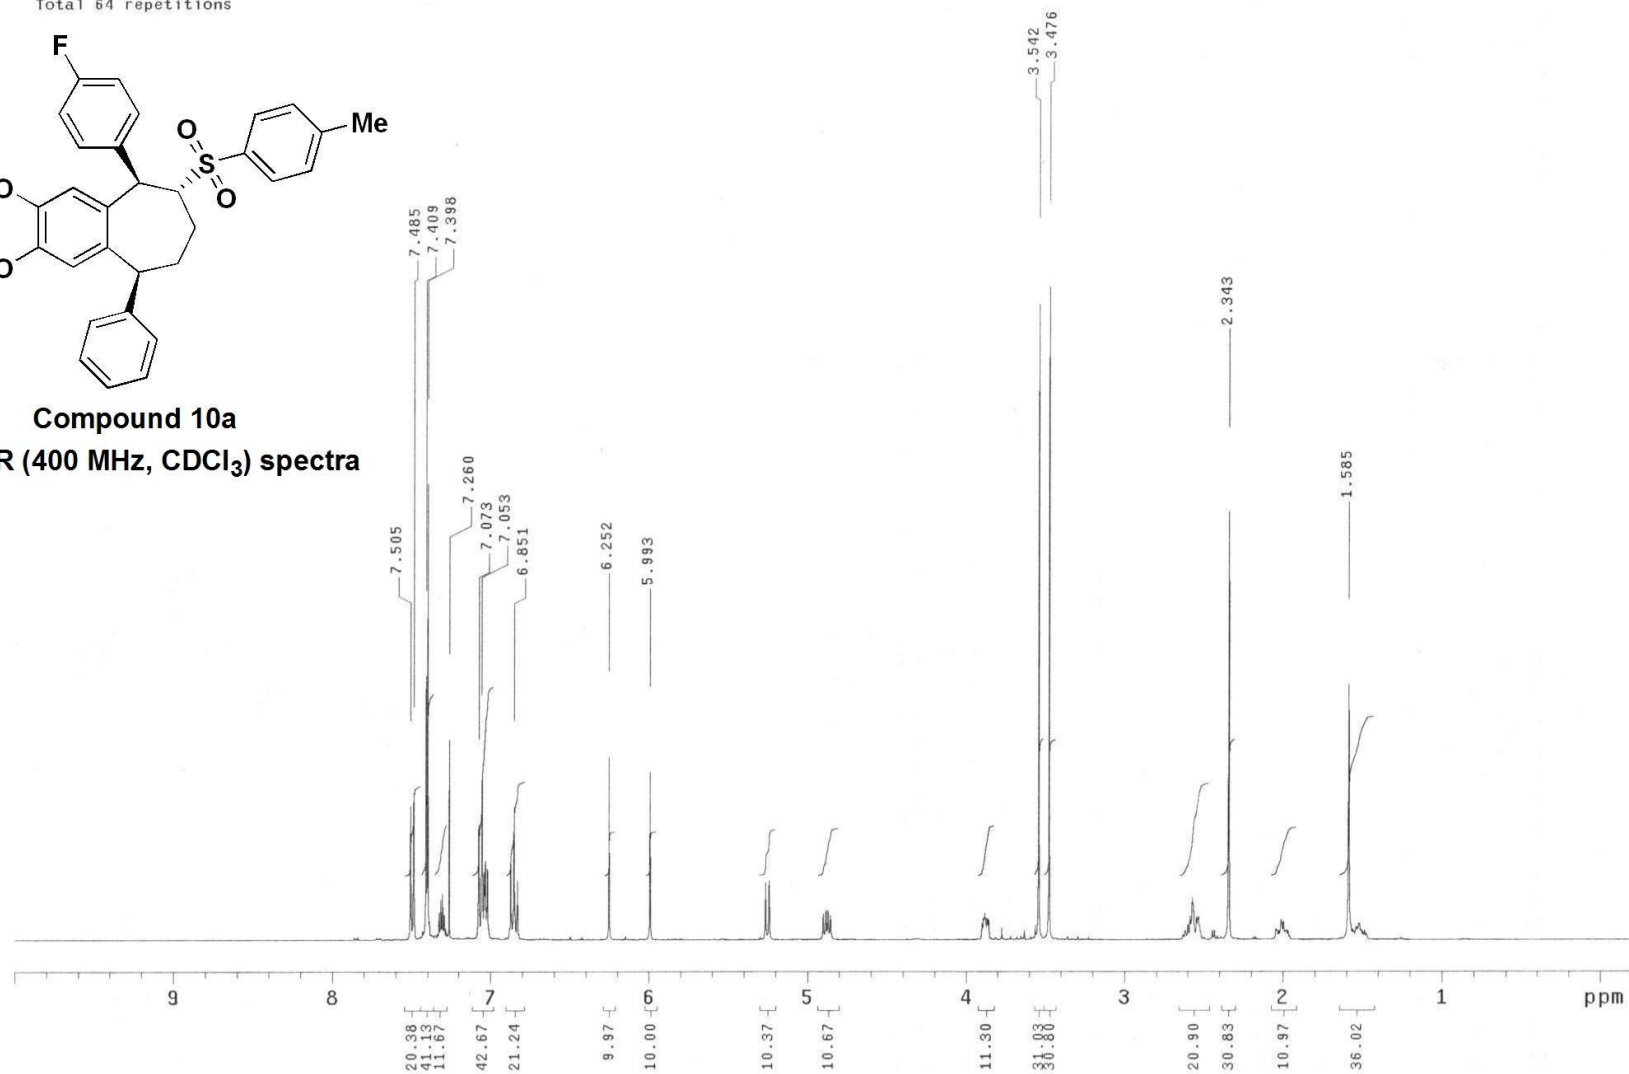

## Compound 10a (<sup>1</sup>H-NMR spectral data-2)

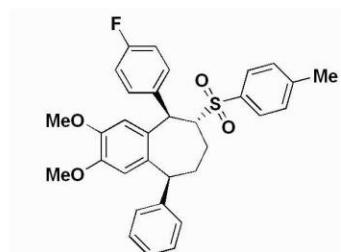

Compound 10a

<sup>1</sup>H NMR (400 MHz, CDCl<sub>3</sub>) spectra

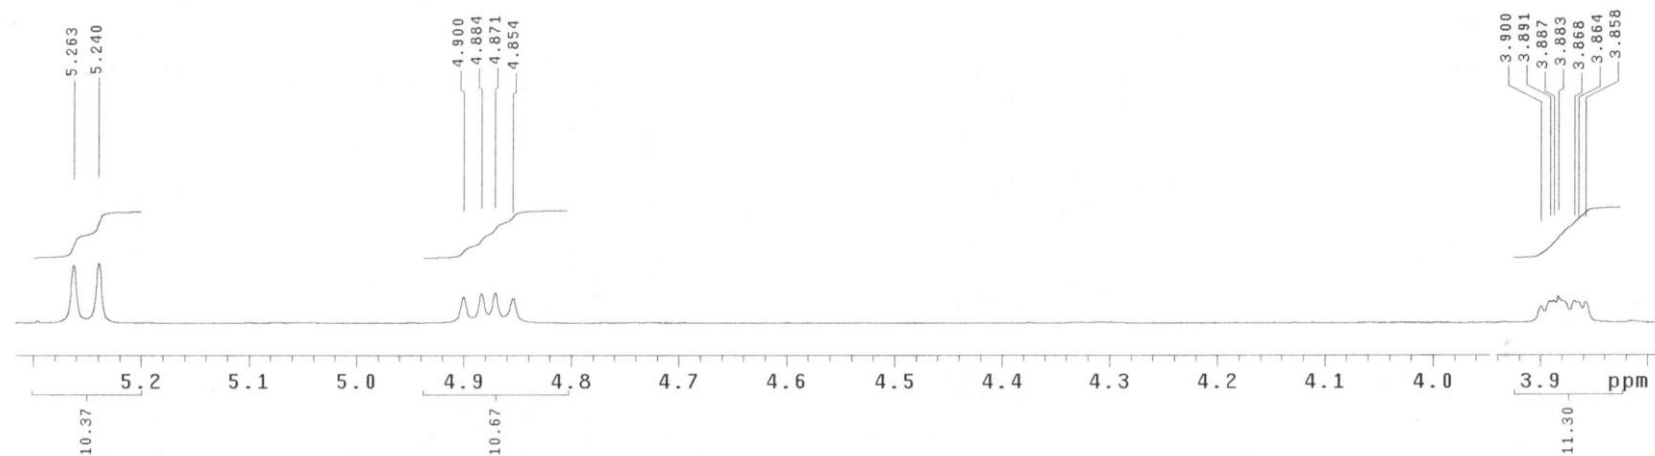

# Compound 10a (<sup>1</sup>H-NMR spectral data-3)

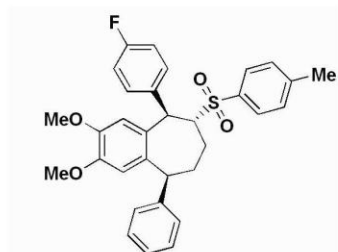

Compound 10a

<sup>1</sup>H NMR (400 MHz, CDCl<sub>3</sub>) spectra

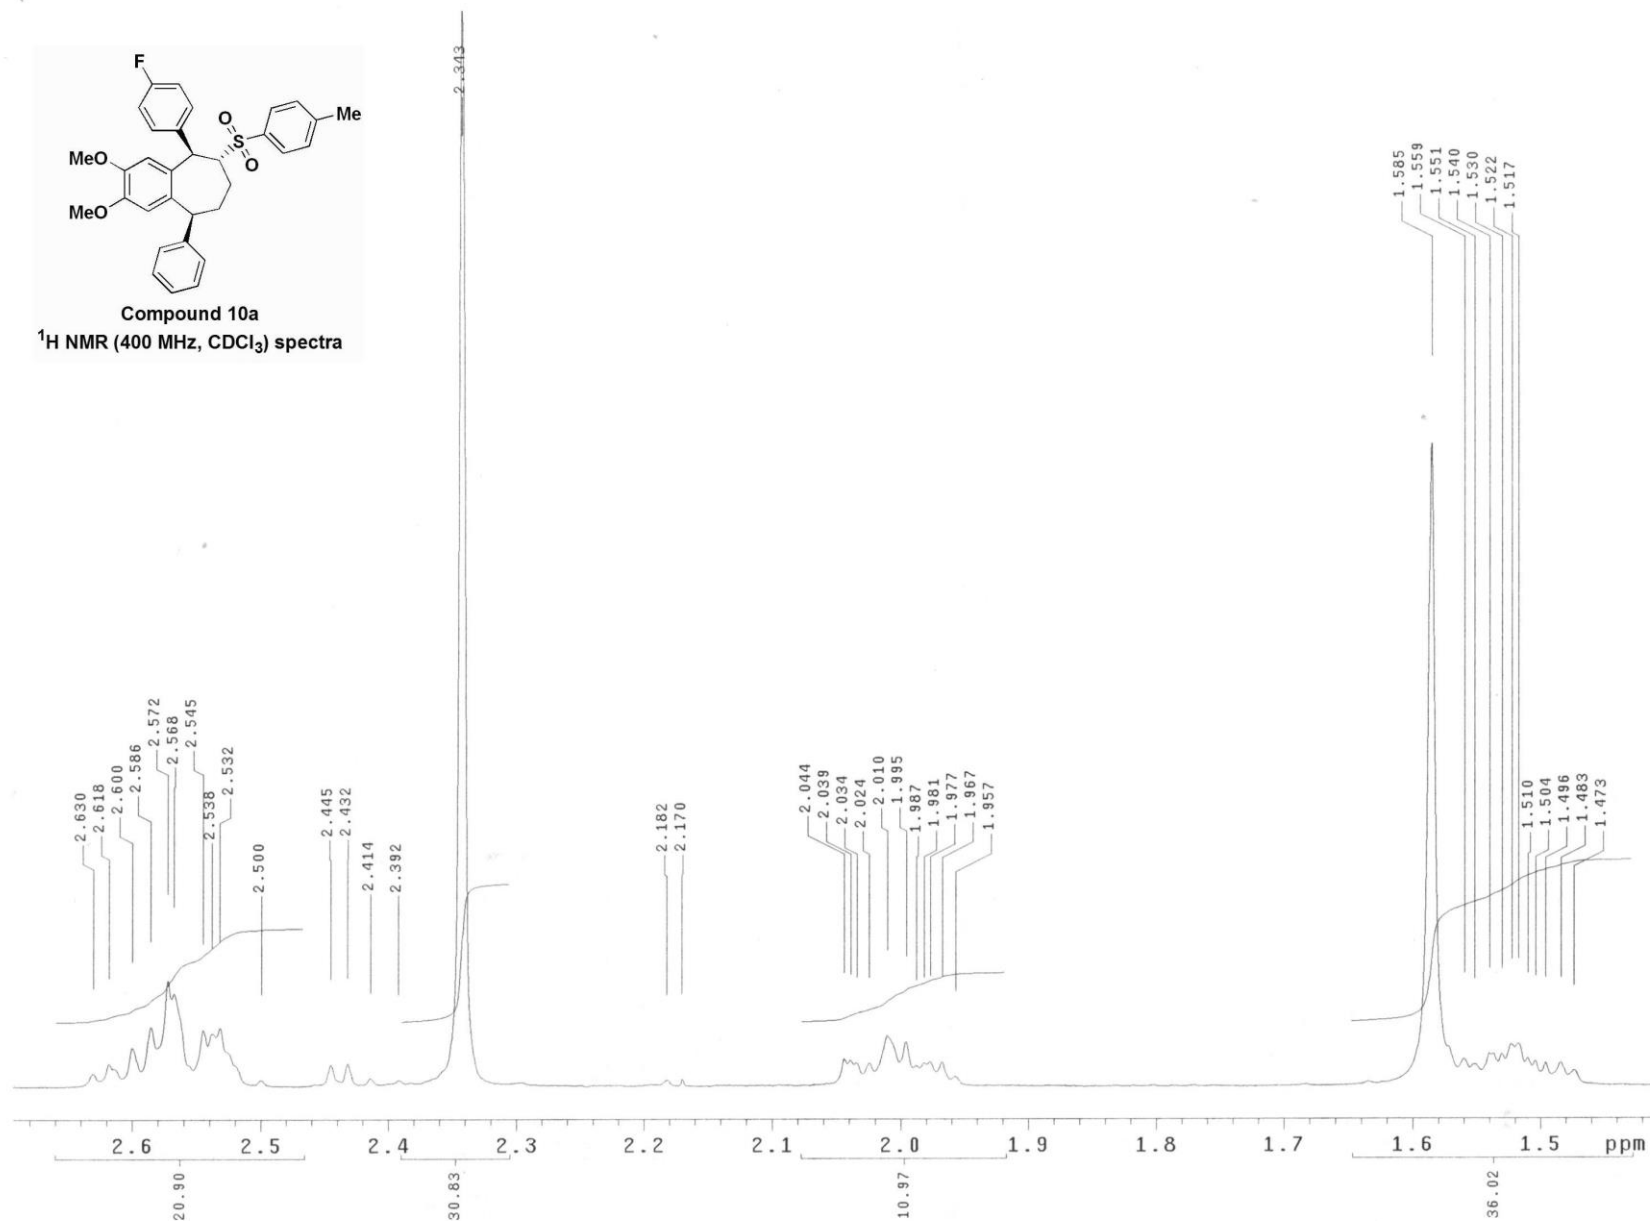

# Compound 10a (<sup>13</sup>C-NMR spectral data)

Kuo1009

Pulse Sequence: s2pu1  
UNITYplus-400 "unity400"  
Date: Nov 6 2015  
Solvent: CDCl<sub>3</sub>  
Ambient temperature  
Total 5024 repetitions

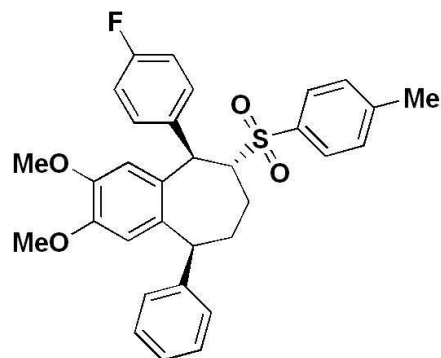

Compound 10a

<sup>13</sup>C NMR (100 MHz, CDCl<sub>3</sub>) spectra

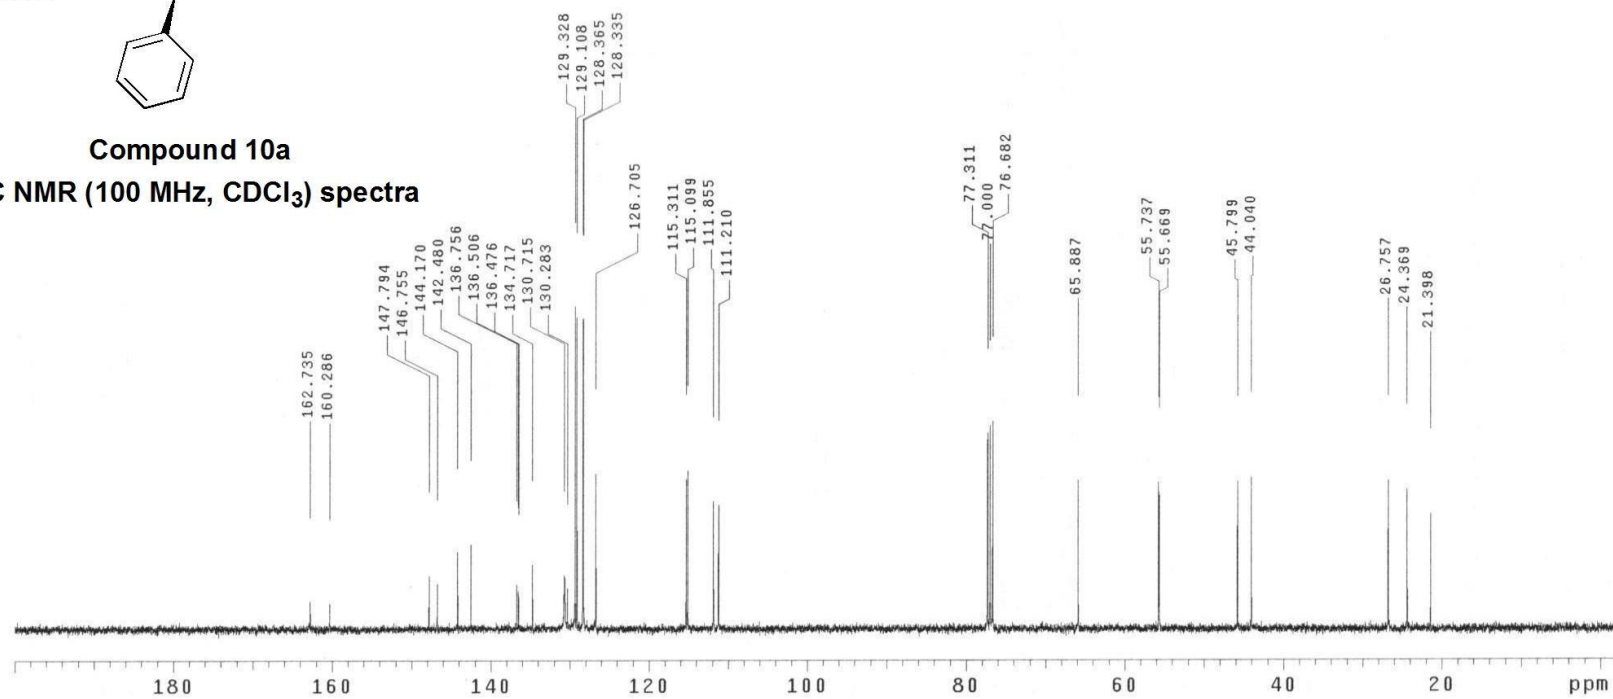

# Compound 10b (<sup>1</sup>H-NMR spectral data-1)

KS10b

Pulse Sequence: s2pu1

UNITYplus-400 "unity400"

Date: May 4 2020

Solvent: CDCl<sub>3</sub>

Ambient temperature

Total 32 repetitions

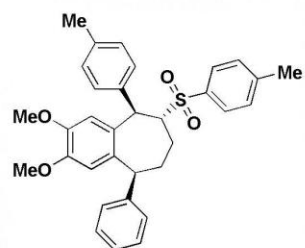

Compound 10b

<sup>1</sup>H NMR (400 MHz, CDCl<sub>3</sub>) spectra

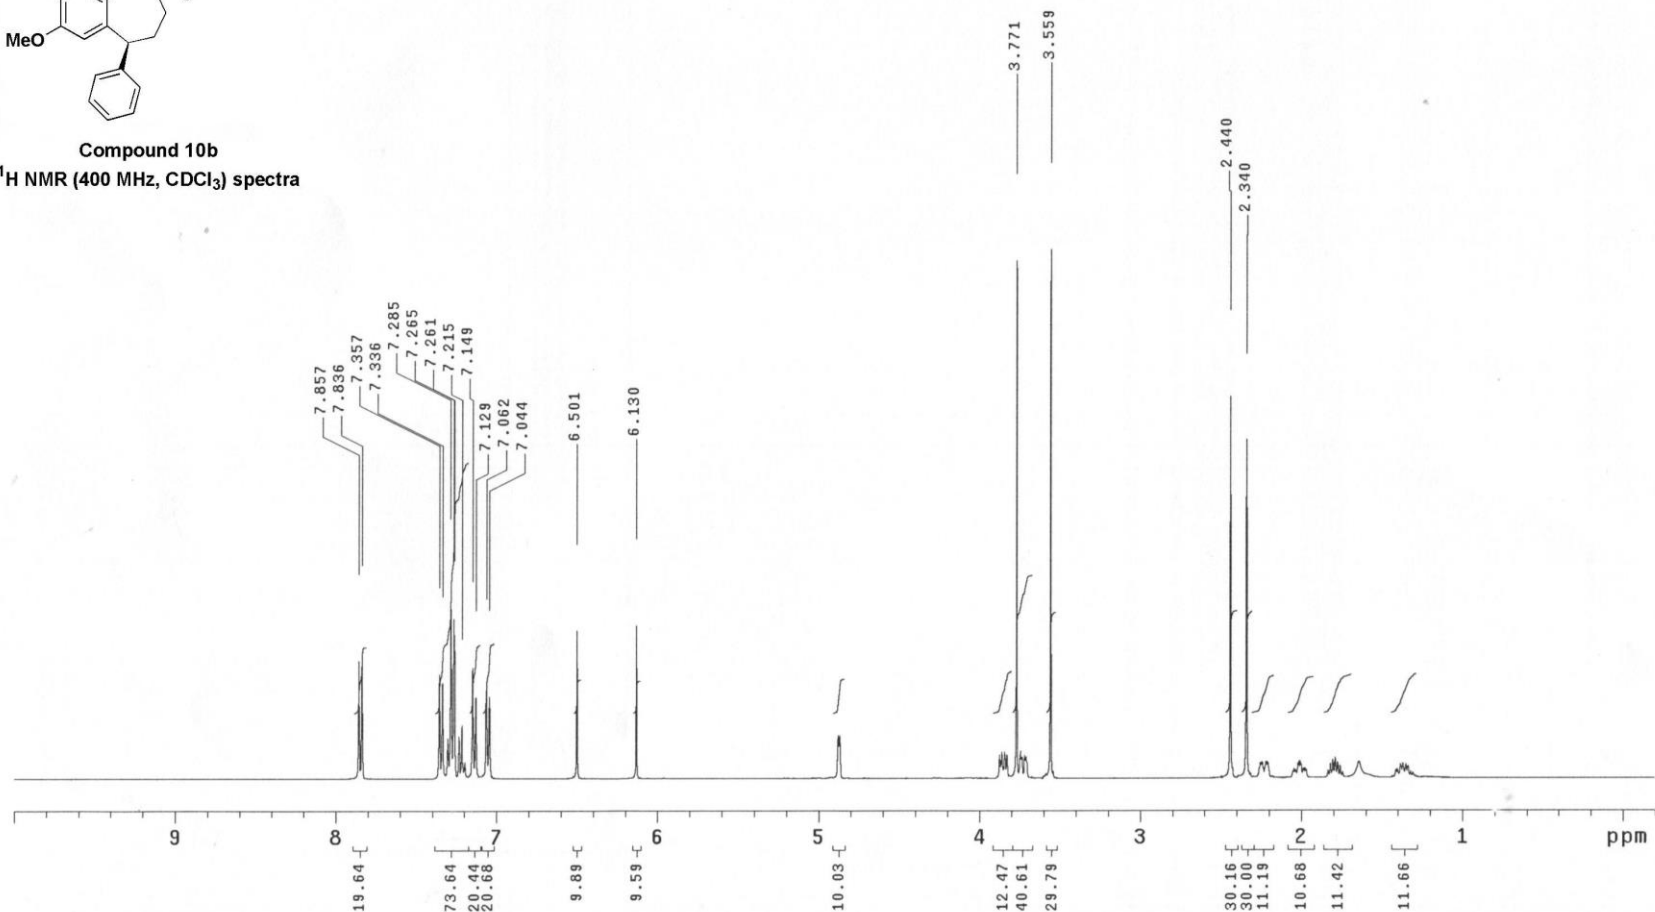

# Compound 10b (<sup>1</sup>H-NMR spectral data-2)

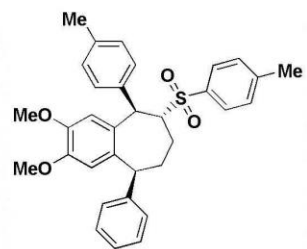

Compound 10b

<sup>1</sup>H NMR (400 MHz, CDCl<sub>3</sub>) spectra

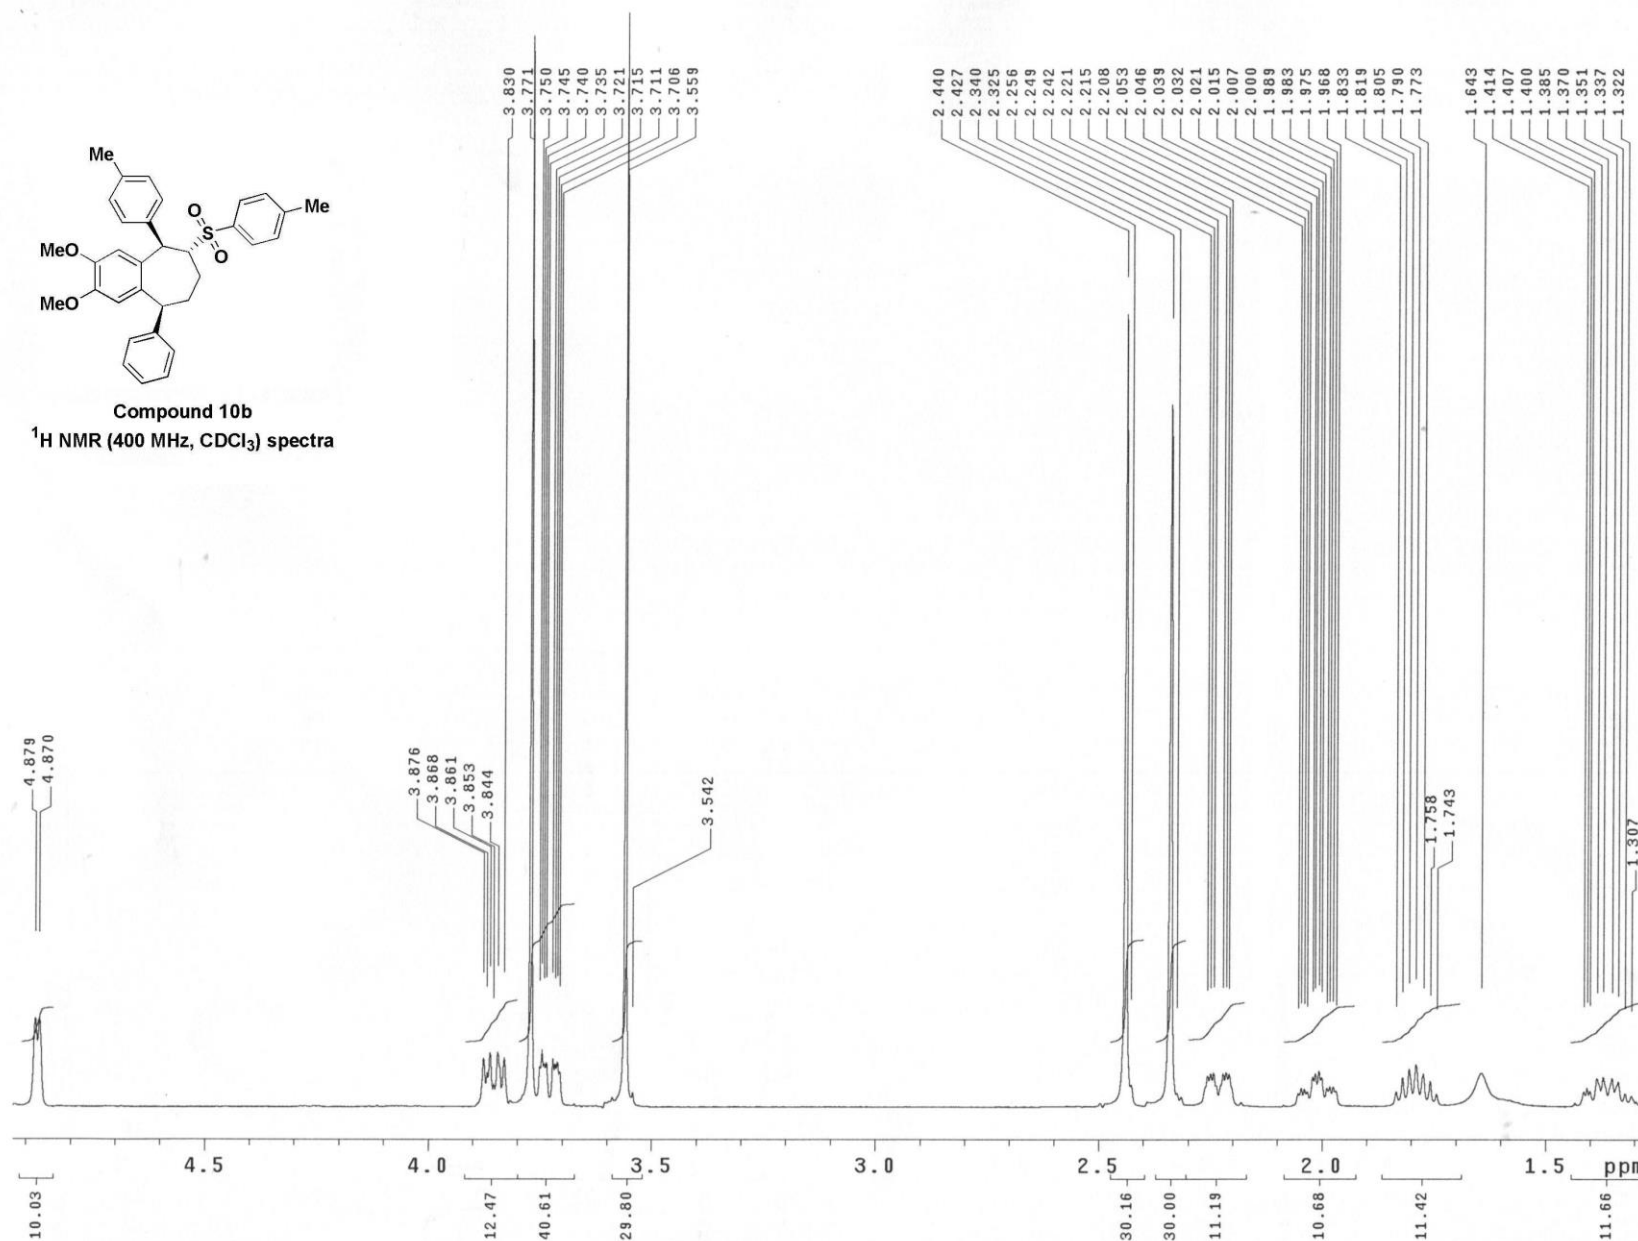

# Compound 10b (<sup>13</sup>C-NMR spectral data)

KS10b

Pulse Sequence: s2pu1

UNITYplus-400 "unity400"

Date: May 4 2020

Solvent: CDCl<sub>3</sub>

Ambient temperature

Total 1600 repetitions

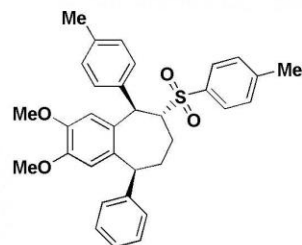

Compound 10b

<sup>13</sup>C NMR (100 MHz, CDCl<sub>3</sub>) spectra

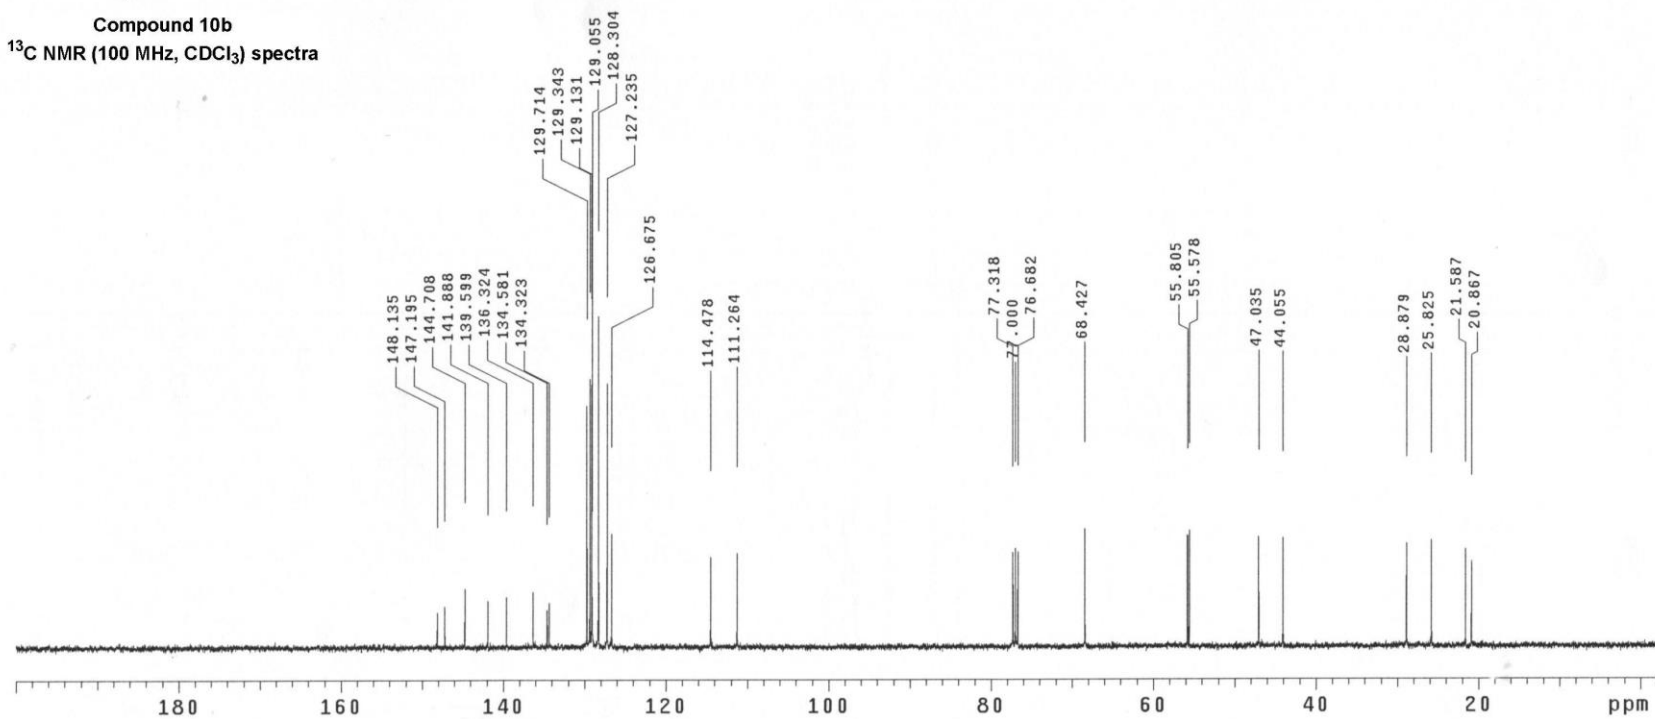

# Compound 10c (<sup>1</sup>H-NMR spectral data-1)

Kuo0904

Pulse Sequence: s2pul

UNITYplus-400 "unity400"

Date: Sep 14 2015

Solvent: CDCl<sub>3</sub>

Ambient temperature

Total 80 repetitions

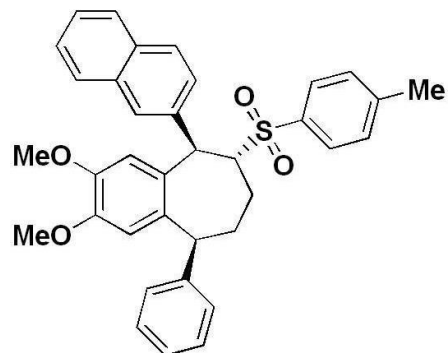

Compound 10c

<sup>1</sup>H NMR (400 MHz, CDCl<sub>3</sub>) spectra

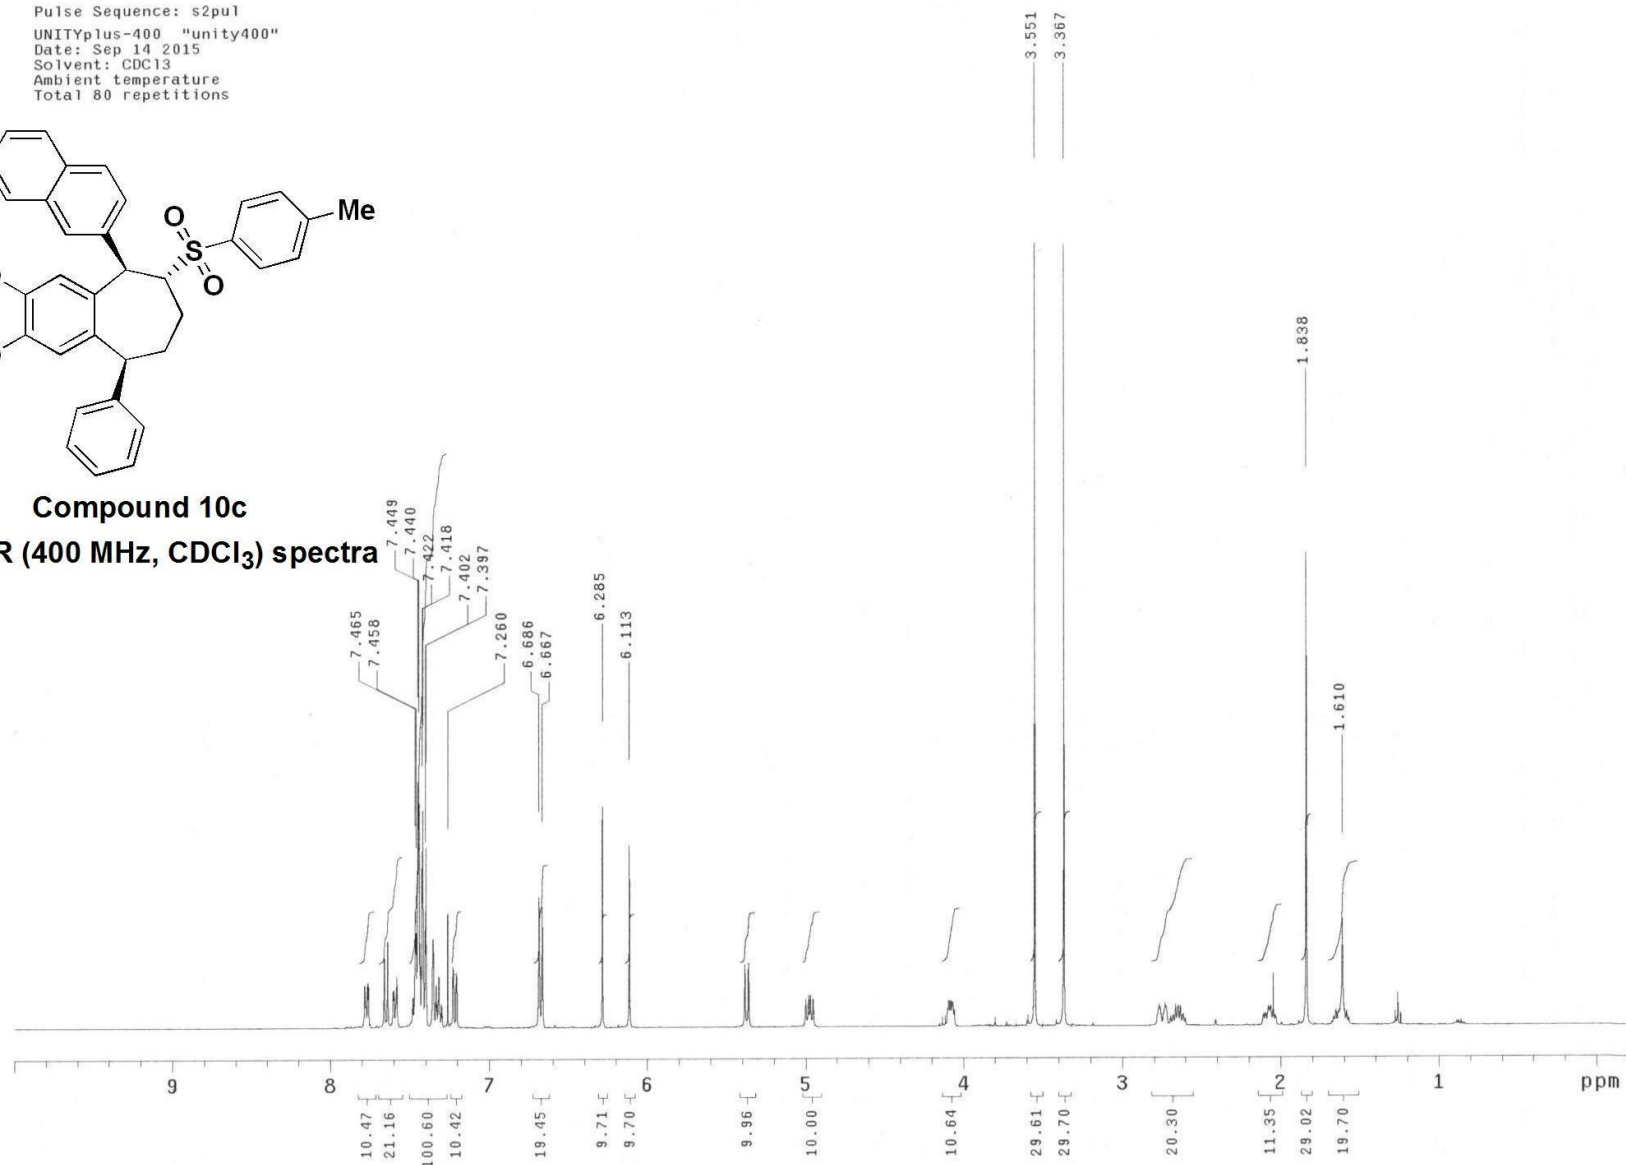

# Compound 10c (<sup>1</sup>H-NMR spectral data-2)

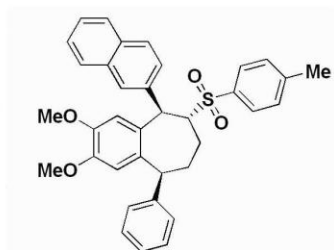

Compound 10c  
<sup>1</sup>H NMR (400 MHz, CDCl<sub>3</sub>) spectra

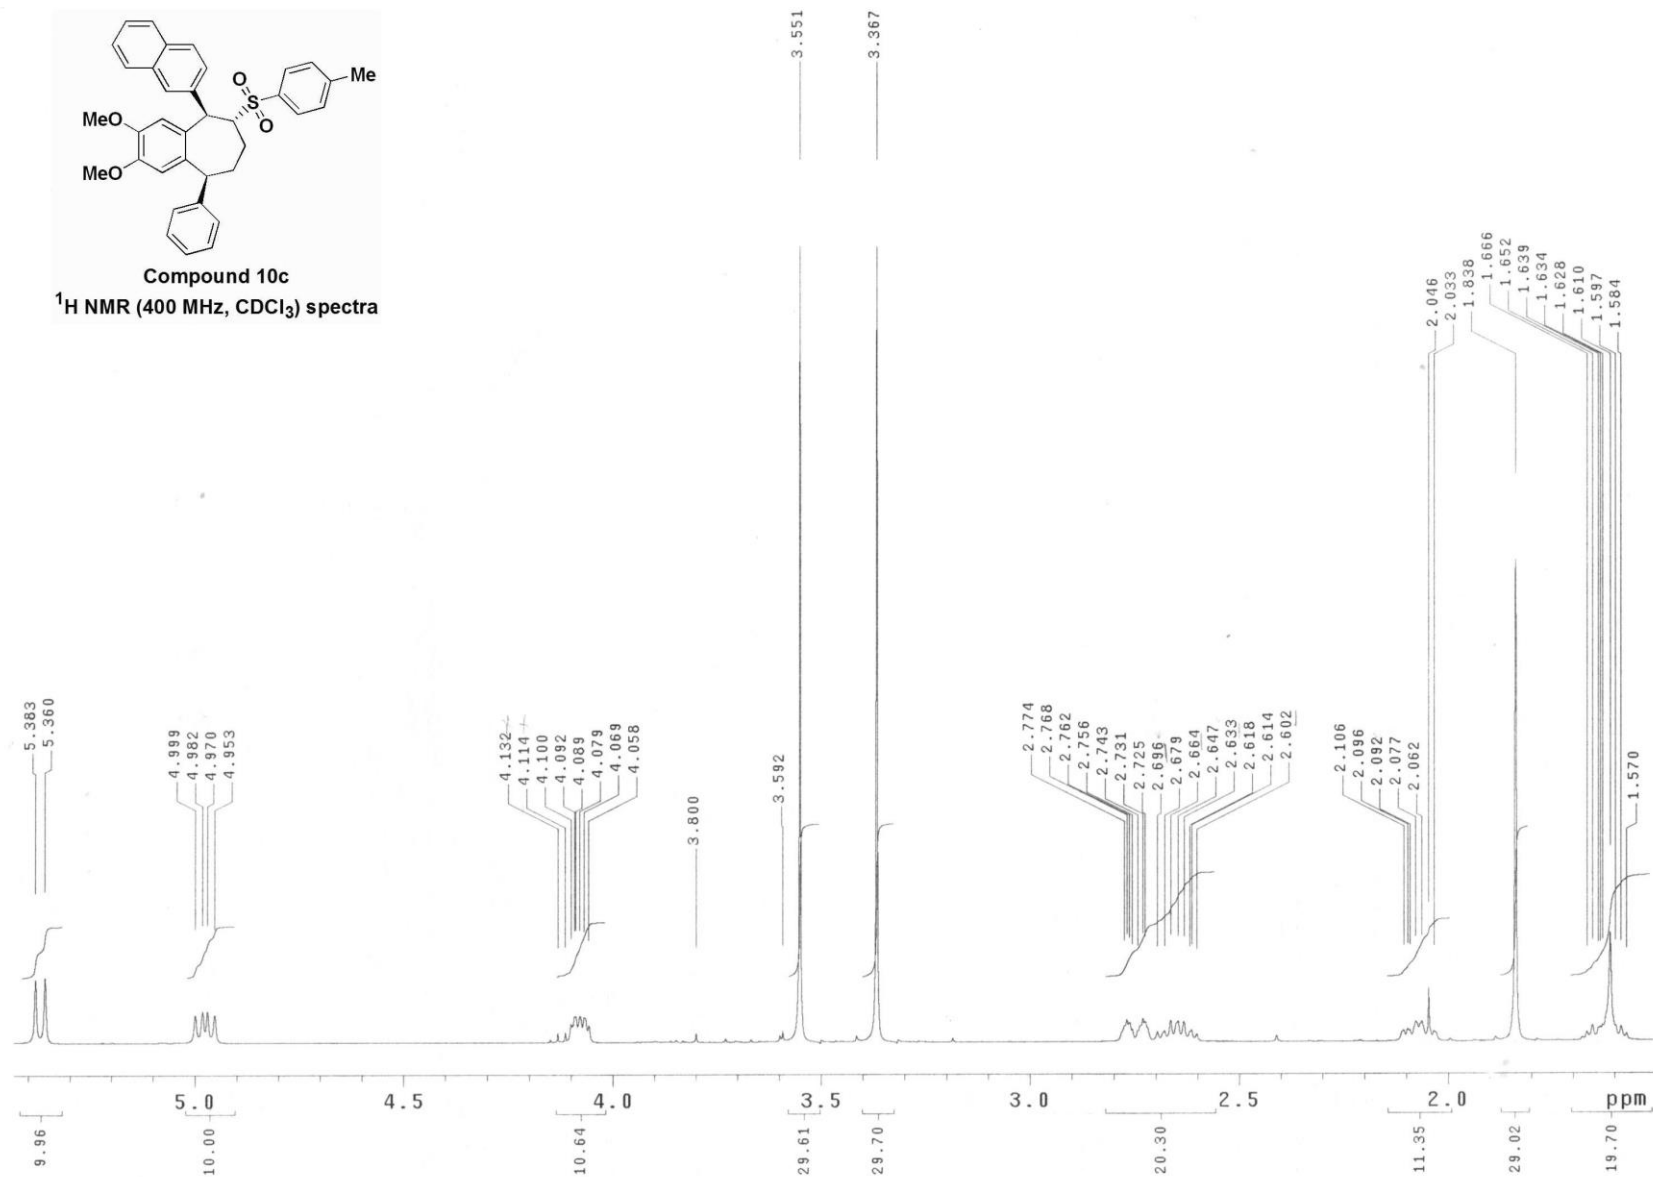

# Compound 10c (<sup>13</sup>C-NMR spectral data)

Kuo0904

Pulse Sequence: s2pul  
UNITYplus-400 "unity400"  
Date: Sep 14 2015  
Solvent: CDCl<sub>3</sub>  
Ambient temperature  
Total 12800 repetitions

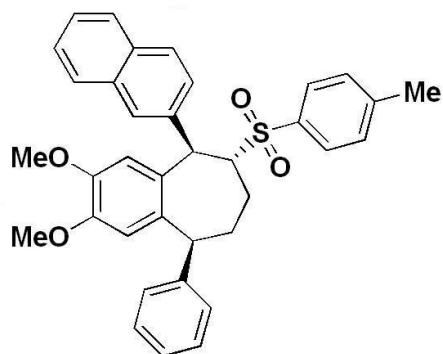

Compound 10c

<sup>13</sup>C NMR (100 MHz, CDCl<sub>3</sub>) spectra

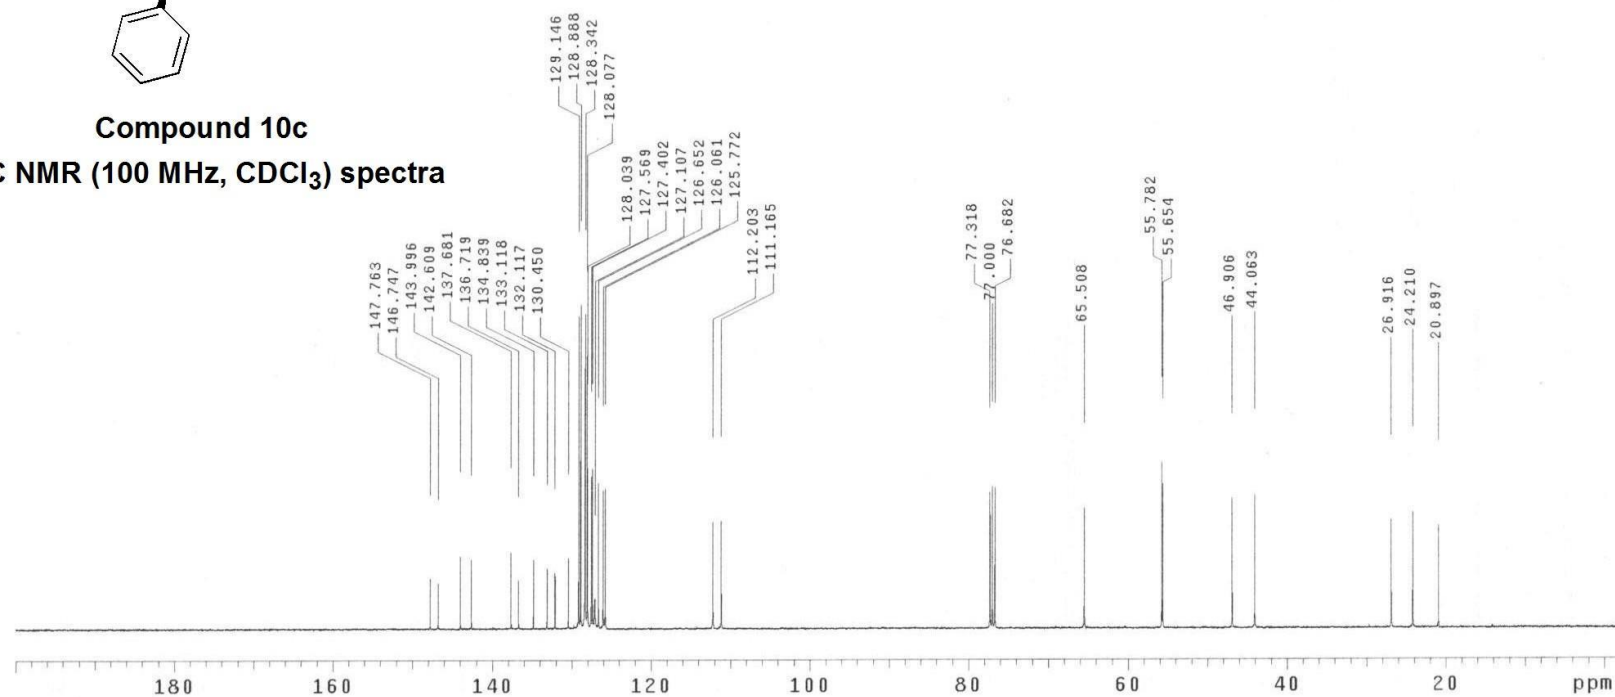

## X-ray crystal data of compound 5a (CCDC 1915762)

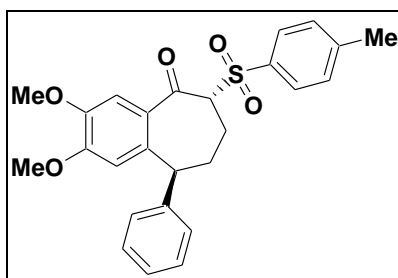

**Sample preparation** : A solution of compound **5a** (30 mg) in CH<sub>2</sub>Cl<sub>2</sub> (10 mL) was placed in a tube (10 mL). EtOAc (2 mL) was added slowly to the vial with a dropper. The vial was closed with little cotton and kept at room temperature for 2 days. Then, colorless prisms were observed.

**Crystal measurement** : X-ray crystal structures were determined with a Bruker Enraf-Nonius single-crystal diffractometer (CAD4, Kappa CCD). Thermal ellipsoids are drawn at 50% probability level.

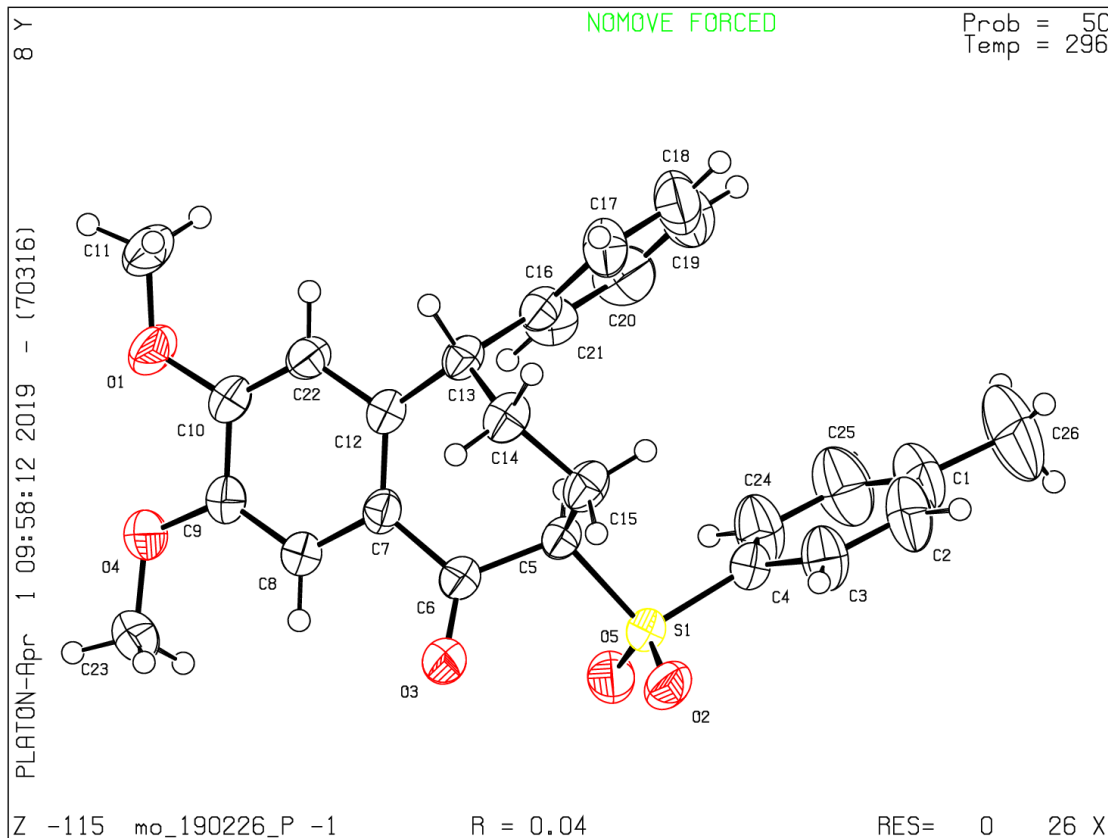

|                                   |                                                  |                               |
|-----------------------------------|--------------------------------------------------|-------------------------------|
| Empirical formula                 | C <sub>26</sub> H <sub>26</sub> O <sub>5</sub> S |                               |
| Formula weight                    | 450.53                                           |                               |
| Temperature                       | 296(2) K                                         |                               |
| Wavelength                        | 0.71073 Å                                        |                               |
| Crystal system                    | Triclinic                                        |                               |
| Space group                       | P-1                                              |                               |
| Unit cell dimensions              | a = 8.6479(4) Å                                  | $\alpha = 114.461(2)^\circ$ . |
|                                   | b = 11.7181(6) Å                                 | $\beta = 90.355(3)^\circ$ .   |
|                                   | c = 12.4402(7) Å                                 | $\gamma = 96.581(3)^\circ$ .  |
| Volume                            | 1137.93(10) Å <sup>3</sup>                       |                               |
| Z                                 | 2                                                |                               |
| Density (calculated)              | 1.315 Mg/m <sup>3</sup>                          |                               |
| Absorption coefficient            | 0.177 mm <sup>-1</sup>                           |                               |
| F(000)                            | 476                                              |                               |
| Crystal size                      | 0.24 x 0.20 x 0.19 mm <sup>3</sup>               |                               |
| Theta range for data collection   | 1.802 to 26.452°.                                |                               |
| Index ranges                      | -10 ≤ h ≤ 10, -13 ≤ k ≤ 14, -15 ≤ l ≤ 15         |                               |
| Reflections collected             | 28716                                            |                               |
| Independent reflections           | 4674 [R(int) = 0.0331]                           |                               |
| Completeness to theta = 25.242°   | 100.0 %                                          |                               |
| Absorption correction             | Semi-empirical from equivalents                  |                               |
| Max. and min. transmission        | 0.7454 and 0.7128                                |                               |
| Refinement method                 | Full-matrix least-squares on F <sup>2</sup>      |                               |
| Data / restraints / parameters    | 4674 / 0 / 292                                   |                               |
| Goodness-of-fit on F <sup>2</sup> | 1.039                                            |                               |
| Final R indices [I > 2σ(I)]       | R1 = 0.0434, wR2 = 0.1020                        |                               |
| R indices (all data)              | R1 = 0.0662, wR2 = 0.1136                        |                               |
| Extinction coefficient            | n/a                                              |                               |
| Largest diff. peak and hole       | 0.223 and -0.289 e.Å <sup>-3</sup>               |                               |

## X-ray crystal data of compound 5b (CCDC 1915763)

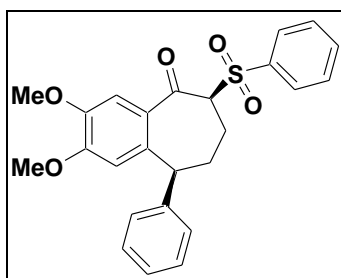

**Sample preparation** : A solution of compound **5b** (30 mg) in CH<sub>2</sub>Cl<sub>2</sub> (10 mL) was placed in a tube (10 mL). EtOAc (2 mL) was added slowly to the vial with a dropper. The vial was closed with little cotton and kept at room temperature for 2 days. Then, colorless prisms were observed.

**Crystal measurement** : X-ray crystal structures were determined with a Bruker Enraf-Nonius single-crystal diffractometer (CAD4, Kappa CCD). Thermal ellipsoids are drawn at 50% probability level.

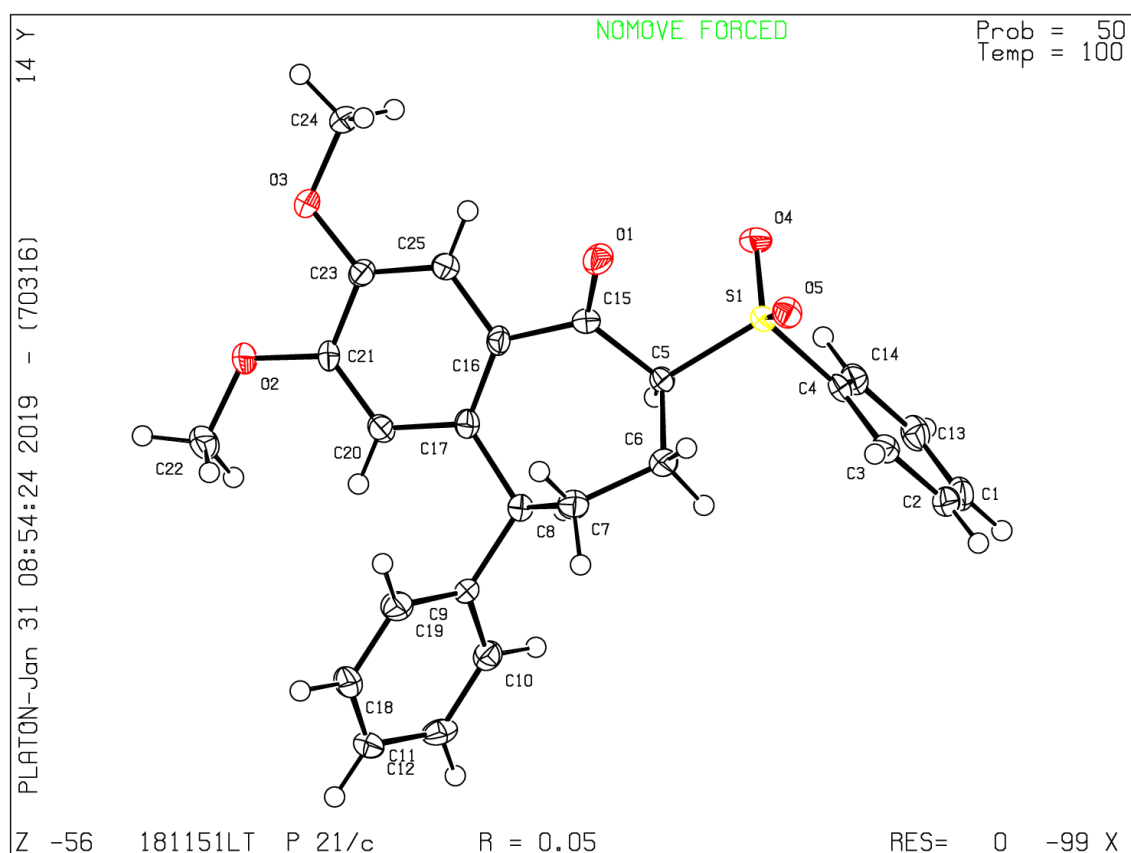

|                                   |                                                                                                            |
|-----------------------------------|------------------------------------------------------------------------------------------------------------|
| Empirical formula                 | C <sub>25</sub> H <sub>24</sub> O <sub>5</sub> S                                                           |
| Formula weight                    | 436.50                                                                                                     |
| Temperature                       | 100(2) K                                                                                                   |
| Wavelength                        | 0.71073 Å                                                                                                  |
| Crystal system                    | Monoclinic                                                                                                 |
| Space group                       | P 21/c                                                                                                     |
| Unit cell dimensions              | a = 12.2830(19) Å      α = 90°.<br>b = 19.038(4) Å      β = 107.381(9)°.<br>c = 9.2274(14) Å      γ = 90°. |
| Volume                            | 2059.2(6) Å <sup>3</sup>                                                                                   |
| Z                                 | 4                                                                                                          |
| Density (calculated)              | 1.408 Mg/m <sup>3</sup>                                                                                    |
| Absorption coefficient            | 0.194 mm <sup>-1</sup>                                                                                     |
| F(000)                            | 920                                                                                                        |
| Crystal size                      | 0.10 x 0.08 x 0.08 mm <sup>3</sup>                                                                         |
| Theta range for data collection   | 1.737 to 26.458°.                                                                                          |
| Index ranges                      | -15 ≤ h ≤ 15, -22 ≤ k ≤ 23, -11 ≤ l ≤ 11                                                                   |
| Reflections collected             | 14957                                                                                                      |
| Independent reflections           | 4226 [R(int) = 0.0578]                                                                                     |
| Completeness to theta = 25.242°   | 100.0 %                                                                                                    |
| Absorption correction             | Semi-empirical from equivalents                                                                            |
| Max. and min. transmission        | 0.7454 and 0.6271                                                                                          |
| Refinement method                 | Full-matrix least-squares on F <sup>2</sup>                                                                |
| Data / restraints / parameters    | 4226 / 0 / 282                                                                                             |
| Goodness-of-fit on F <sup>2</sup> | 1.034                                                                                                      |
| Final R indices [I > 2σ(I)]       | R1 = 0.0471, wR2 = 0.1017                                                                                  |
| R indices (all data)              | R1 = 0.0745, wR2 = 0.1146                                                                                  |
| Extinction coefficient            | n/a                                                                                                        |
| Largest diff. peak and hole       | 0.441 and -0.461 e.Å <sup>-3</sup>                                                                         |

## X-ray crystal data of compound 6a (CCDC 1915765)

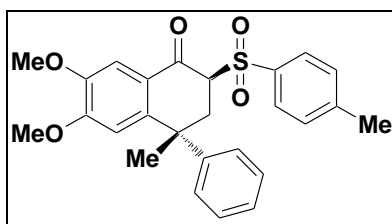

**Sample preparation** : A solution of compound **6a** (30 mg) in  $\text{CH}_2\text{Cl}_2$  (10 mL) was placed in a tube (10 mL). EtOAc (2 mL) was added slowly to the vial with a dropper. The vial was closed with little cotton and kept at room temperature for 2 days. Then, colorless prisms were observed.

**Crystal measurement** : X-ray crystal structures were determined with a Bruker Enraf-Nonius single-crystal diffractometer (CAD4, Kappa CCD). Thermal ellipsoids are drawn at 50% probability level.

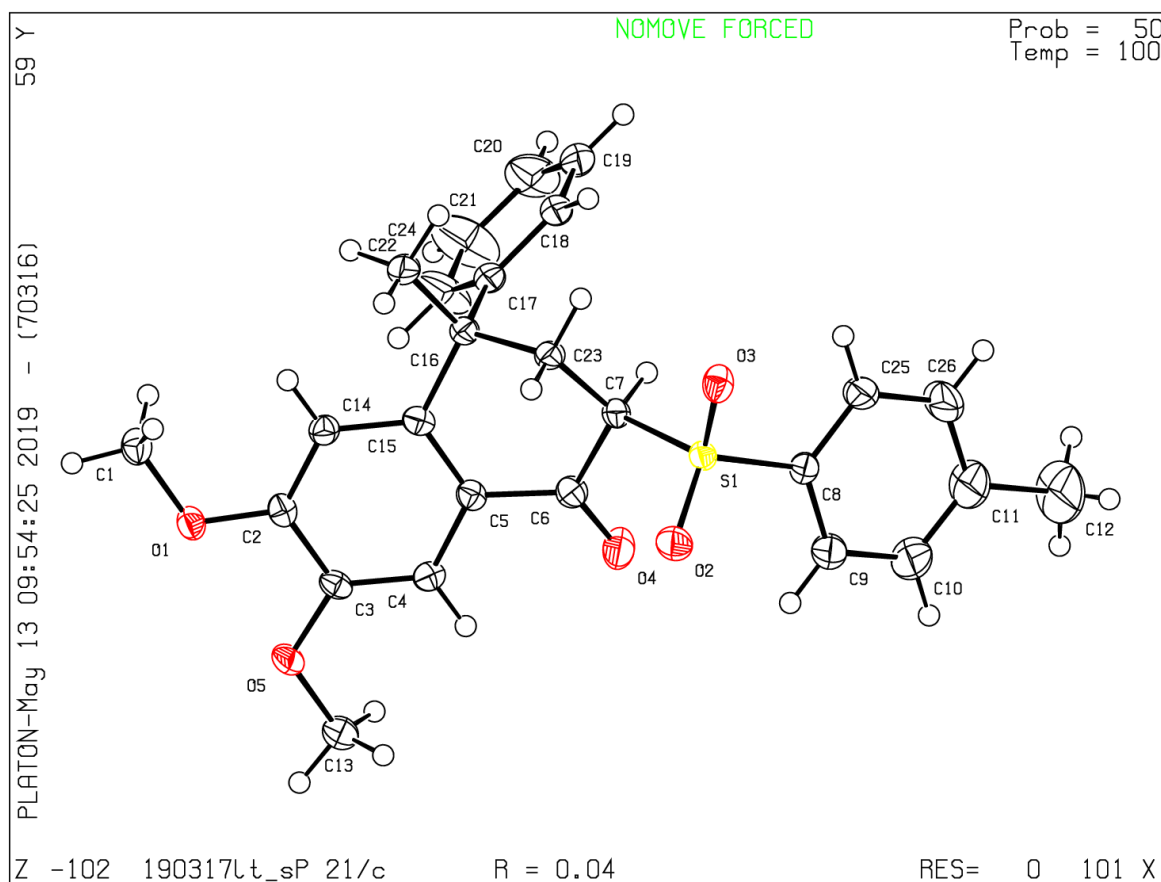

|                                   |                                                                                                           |
|-----------------------------------|-----------------------------------------------------------------------------------------------------------|
| Empirical formula                 | C <sub>26</sub> H <sub>26</sub> O <sub>5</sub> S                                                          |
| Formula weight                    | 450.53                                                                                                    |
| Temperature                       | 100(2) K                                                                                                  |
| Wavelength                        | 0.71073 Å                                                                                                 |
| Crystal system                    | Monoclinic                                                                                                |
| Space group                       | P2 <sub>1</sub> /c                                                                                        |
| Unit cell dimensions              | a = 17.4857(9) Å      α = 90°.<br>b = 9.6877(5) Å      β = 118.713(3)°.<br>c = 17.1467(9) Å      γ = 90°. |
| Volume                            | 2547.4(2) Å <sup>3</sup>                                                                                  |
| Z                                 | 4                                                                                                         |
| Density (calculated)              | 1.175 Mg/m <sup>3</sup>                                                                                   |
| Absorption coefficient            | 0.159 mm <sup>-1</sup>                                                                                    |
| F(000)                            | 952                                                                                                       |
| Crystal size                      | 0.10 x 0.08 x 0.03 mm <sup>3</sup>                                                                        |
| Theta range for data collection   | 2.376 to 26.419°.                                                                                         |
| Index ranges                      | -21 ≤ h ≤ 21, -12 ≤ k ≤ 12, -21 ≤ l ≤ 21                                                                  |
| Reflections collected             | 22006                                                                                                     |
| Independent reflections           | 5222 [R(int) = 0.0316]                                                                                    |
| Completeness to theta = 25.242°   | 100.0 %                                                                                                   |
| Absorption correction             | Semi-empirical from equivalents                                                                           |
| Max. and min. transmission        | 0.7454 and 0.7144                                                                                         |
| Refinement method                 | Full-matrix least-squares on F <sup>2</sup>                                                               |
| Data / restraints / parameters    | 5222 / 0 / 293                                                                                            |
| Goodness-of-fit on F <sup>2</sup> | 1.032                                                                                                     |
| Final R indices [I > 2σ(I)]       | R1 = 0.0395, wR2 = 0.0935                                                                                 |
| R indices (all data)              | R1 = 0.0524, wR2 = 0.1009                                                                                 |
| Extinction coefficient            | n/a                                                                                                       |
| Largest diff. peak and hole       | 0.372 and -0.379 e.Å <sup>-3</sup>                                                                        |

## X-ray crystal data of compound 10c (CCDC 1915767)

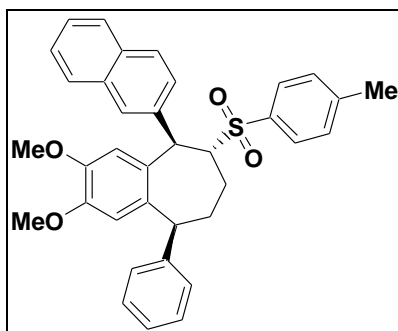

**Sample preparation** : A solution of compound **10c** (30 mg) in CH<sub>2</sub>Cl<sub>2</sub> (10 mL) was placed in a tube (10 mL). EtOAc (2 mL) was added slowly to the vial with a dropper. The vial was closed with little cotton and kept at room temperature for 2 days. Then, colorless prisms were observed.

**Crystal measurement** : X-ray crystal structures were determined with a Bruker Enraf-Nonius single-crystal diffractometer (CAD4, Kappa CCD). Thermal ellipsoids are drawn at 50% probability level.

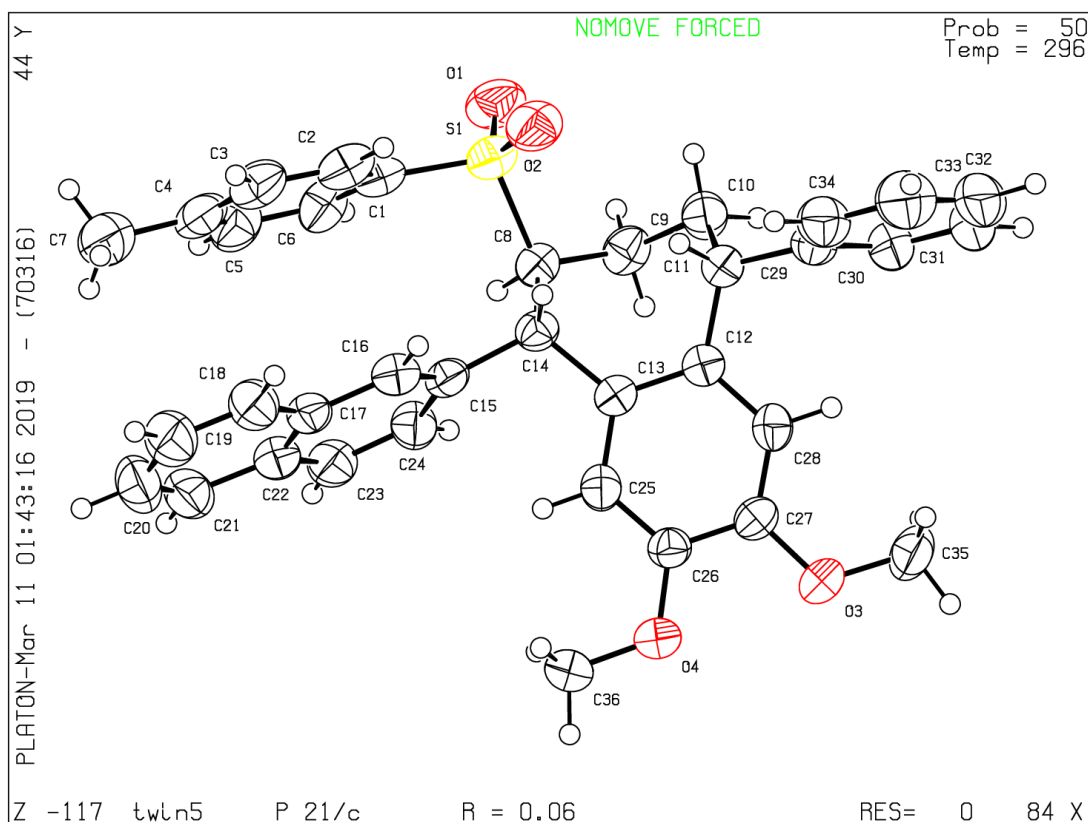

|                                   |                                                  |                              |
|-----------------------------------|--------------------------------------------------|------------------------------|
| Empirical formula                 | C <sub>36</sub> H <sub>34</sub> O <sub>4</sub> S |                              |
| Formula weight                    | 562.69                                           |                              |
| Temperature                       | 296(2) K                                         |                              |
| Wavelength                        | 0.71073 Å                                        |                              |
| Crystal system                    | Monoclinic                                       |                              |
| Space group                       | P 21/c                                           |                              |
| Unit cell dimensions              | a = 15.699(4) Å                                  | $\alpha = 90^\circ$ .        |
|                                   | b = 7.434(2) Å                                   | $\beta = 98.529(16)^\circ$ . |
|                                   | c = 24.908(8) Å                                  | $\gamma = 90^\circ$ .        |
| Volume                            | 2874.6(14) Å <sup>3</sup>                        |                              |
| Z                                 | 4                                                |                              |
| Density (calculated)              | 1.300 Mg/m <sup>3</sup>                          |                              |
| Absorption coefficient            | 0.153 mm <sup>-1</sup>                           |                              |
| F(000)                            | 1192                                             |                              |
| Crystal size                      | 0.18 x 0.15 x 0.06 mm <sup>3</sup>               |                              |
| Theta range for data collection   | 1.312 to 25.146°.                                |                              |
| Index ranges                      | -18 ≤ h ≤ 18, 0 ≤ k ≤ 8, 0 ≤ l ≤ 29              |                              |
| Reflections collected             | 5423                                             |                              |
| Independent reflections           | 5423 [R(int) = 0.0753]                           |                              |
| Completeness to theta = 25.000°   | 100.0 %                                          |                              |
| Absorption correction             | Semi-empirical from equivalents                  |                              |
| Max. and min. transmission        | 0.9484 and 0.5049                                |                              |
| Refinement method                 | Full-matrix least-squares on F <sup>2</sup>      |                              |
| Data / restraints / parameters    | 5423 / 0 / 374                                   |                              |
| Goodness-of-fit on F <sup>2</sup> | 1.047                                            |                              |
| Final R indices [I > 2σ(I)]       | R1 = 0.0641, wR2 = 0.1662                        |                              |
| R indices (all data)              | R1 = 0.1166, wR2 = 0.1989                        |                              |
| Extinction coefficient            | n/a                                              |                              |
| Largest diff. peak and hole       | 0.339 and -0.291 e.Å <sup>-3</sup>               |                              |
